# Supplementary material for: High-throughput screening of chemicals as functional substitutes using structure-based classification models
Source: Royal Society of Chemistry journal article supplement (doi:10.1039/c6gc02744j), 2016-12-20
Supplement: c6gc02744j1.pdf [file c6gc02744j1.pdf]

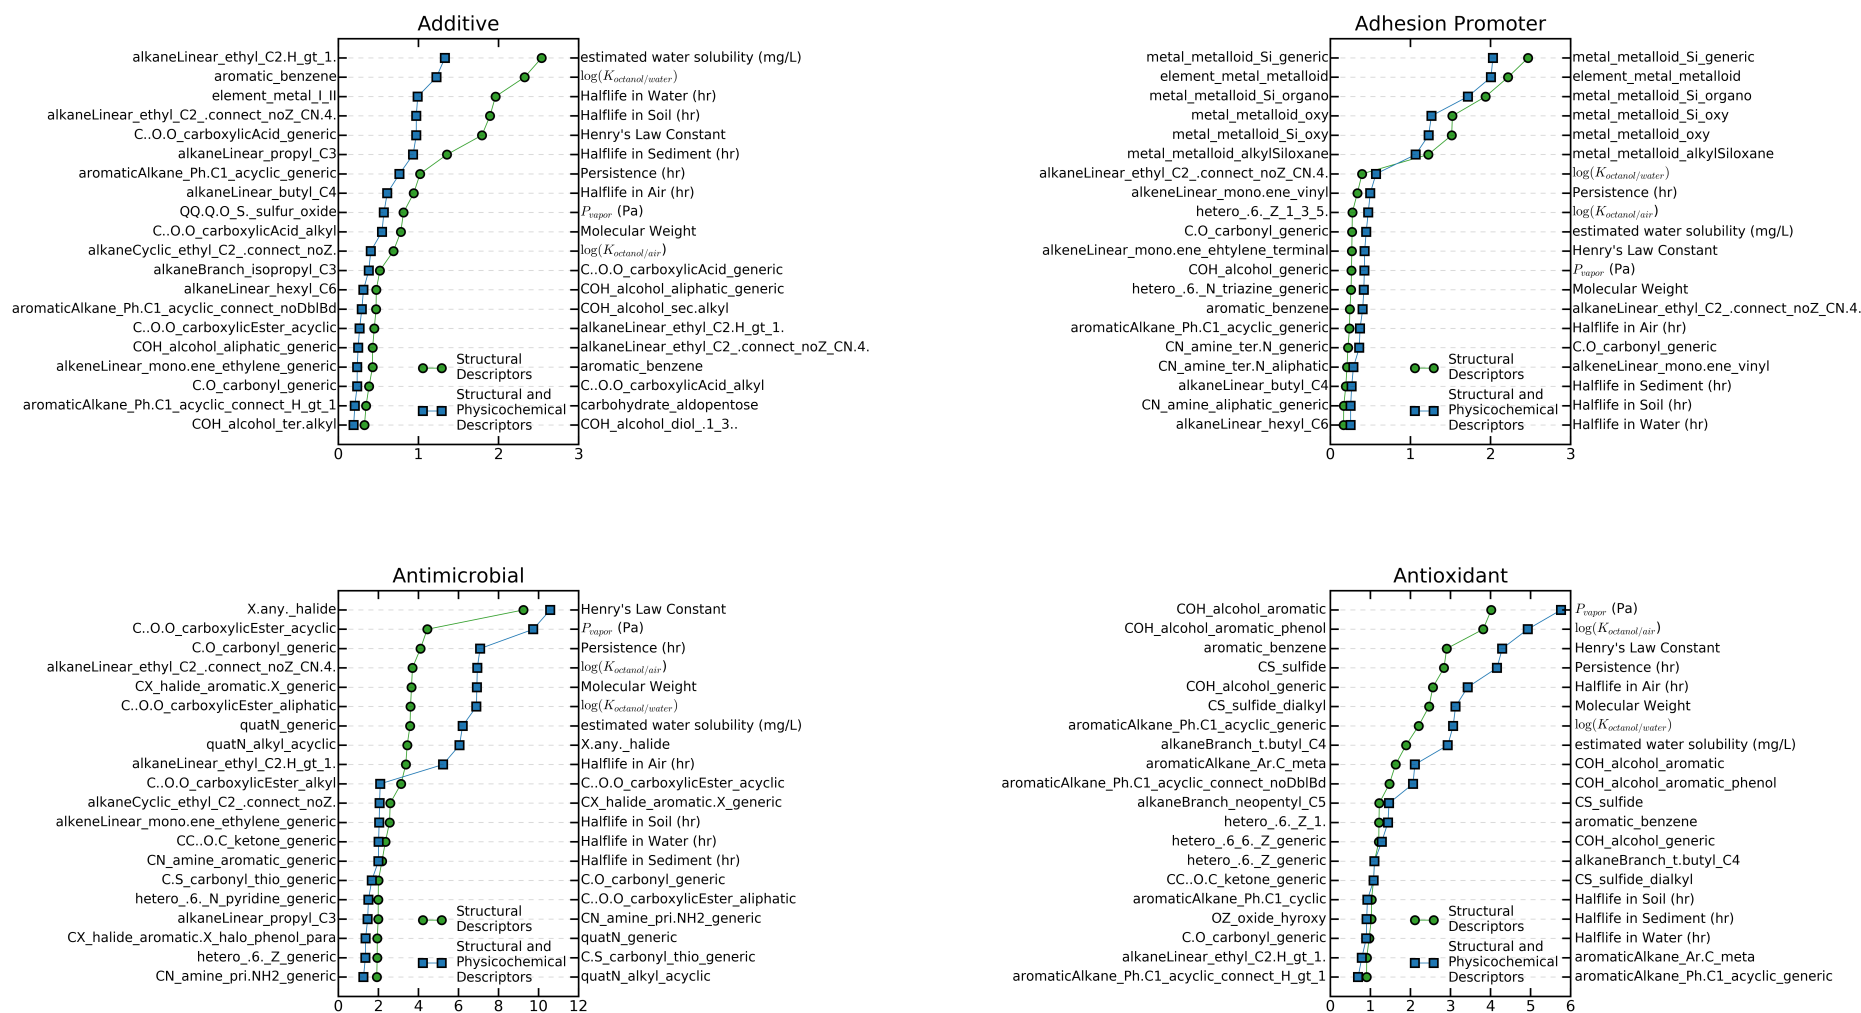

SI Figure 1: Most important variables for additive, adhesion promoter, antimicrobial, and antioxidant QSUR models.

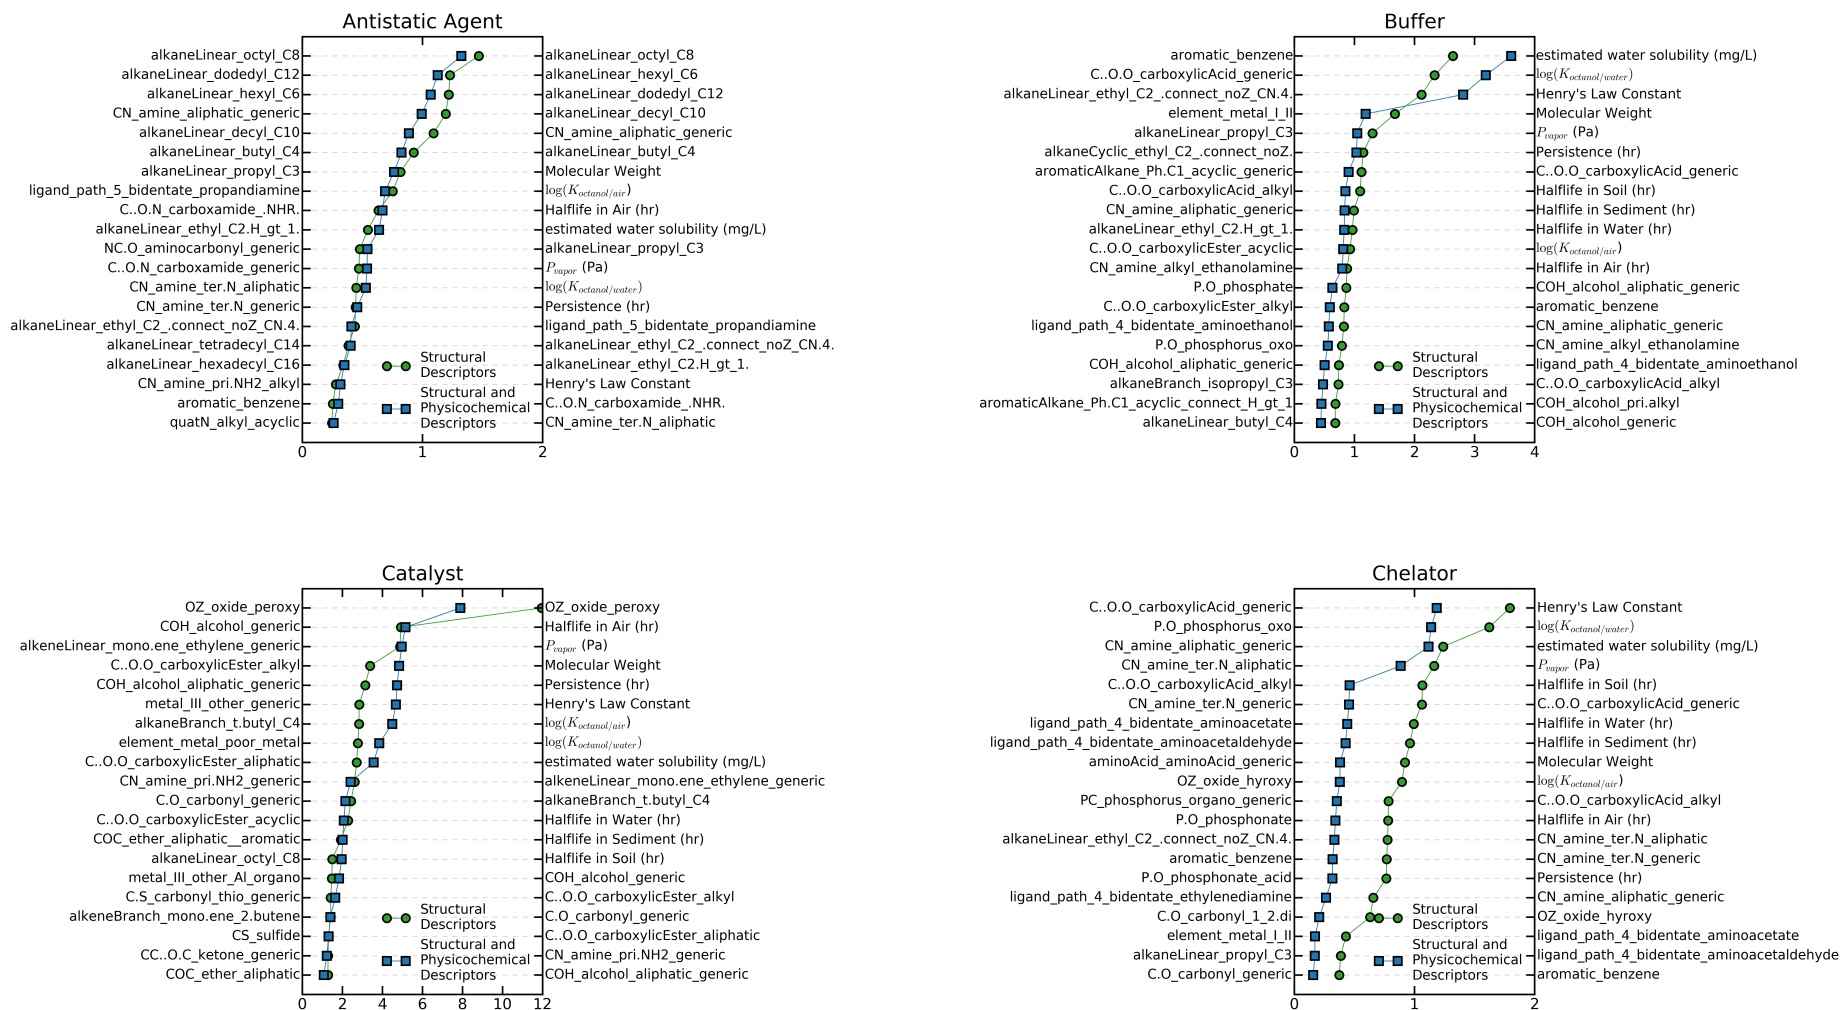

SI Figure 2: Most important variables for antistatic agent, buffer, catalyst, and chelator QSUR models.

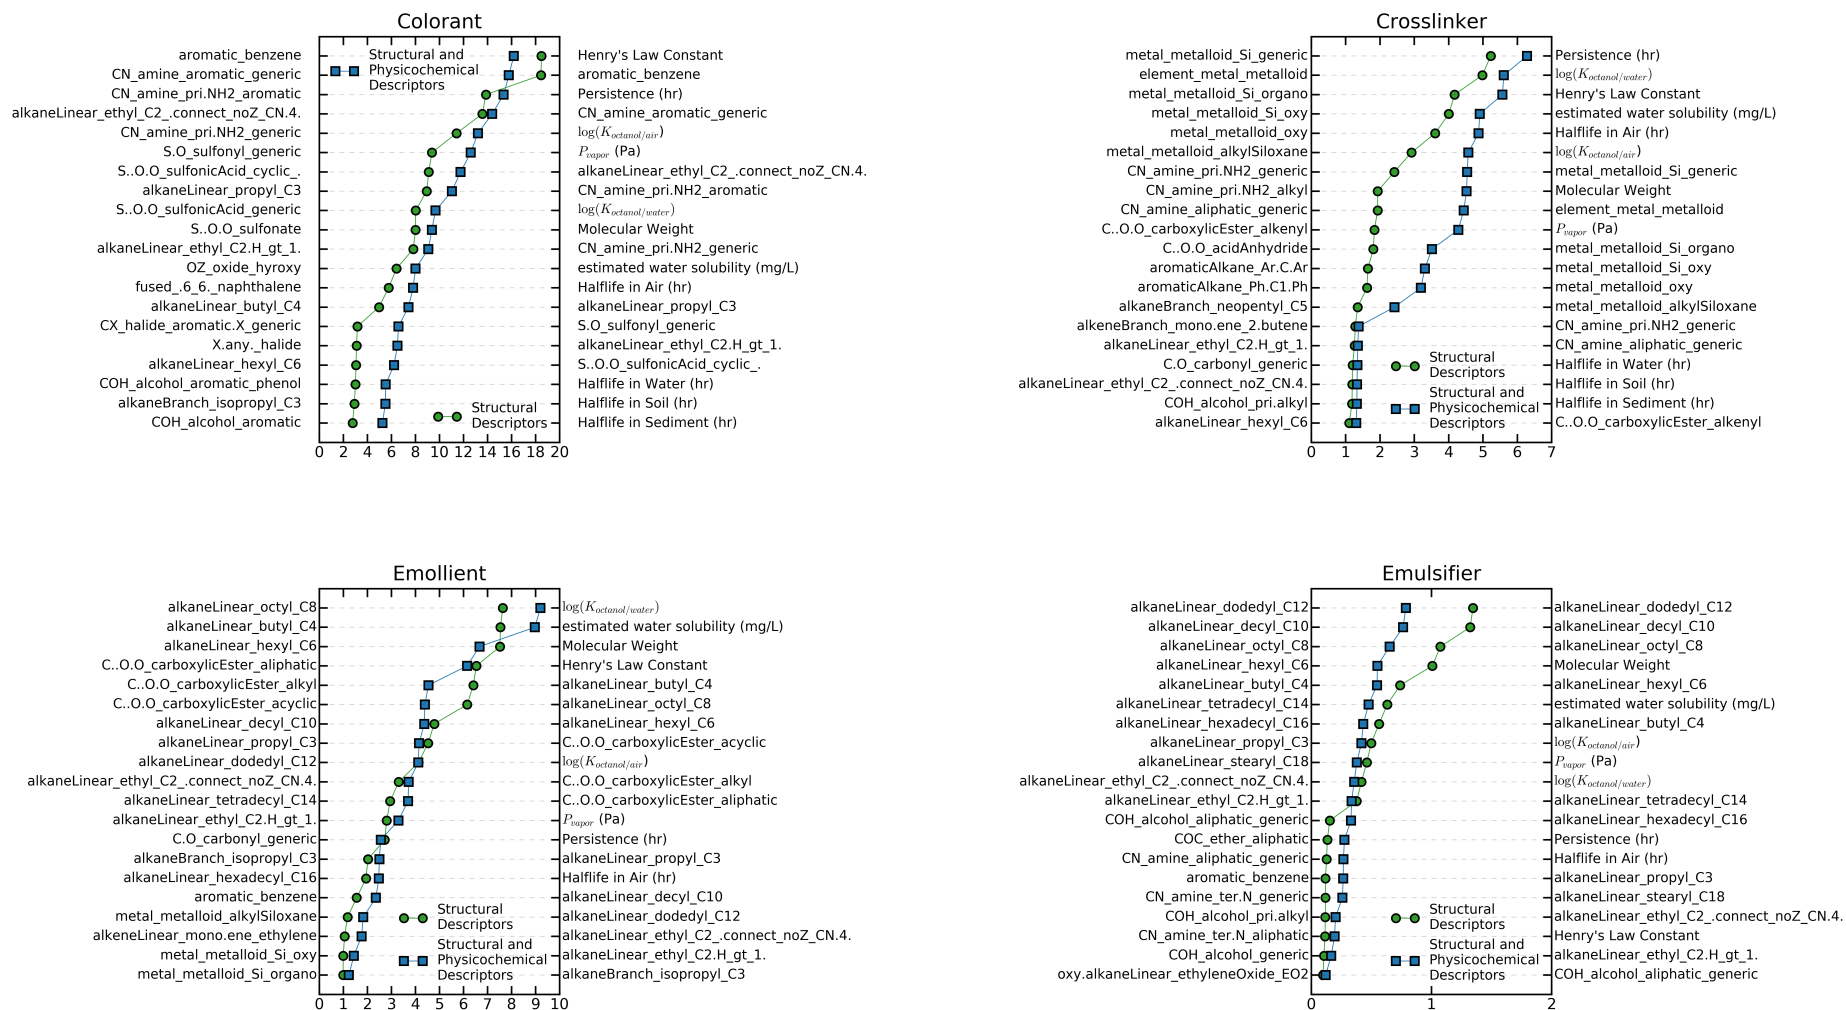

SI Figure 3: Most important variables for colorant, crosslinker, emollient, and emulsifier QSUR models.

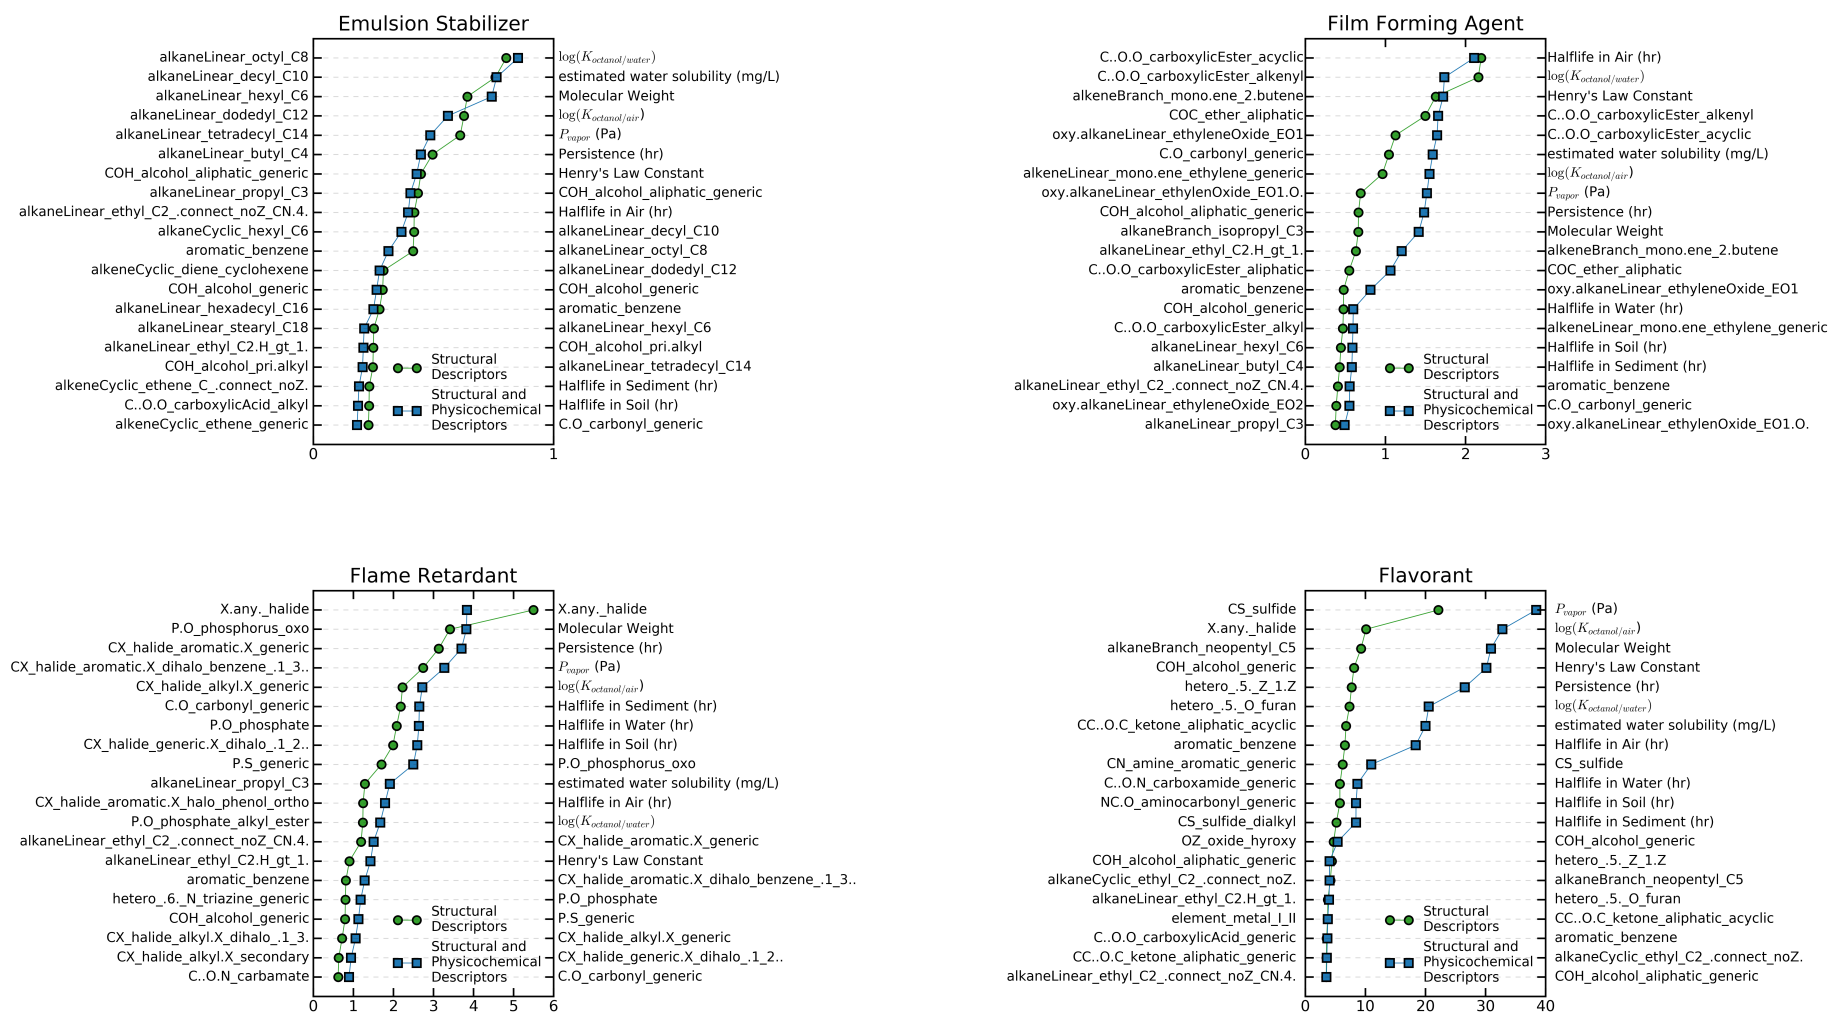

SI Figure 4: Most important variables for emulsion stabilizer, film forming agent, flame retardant, and flavorant QSUR models.



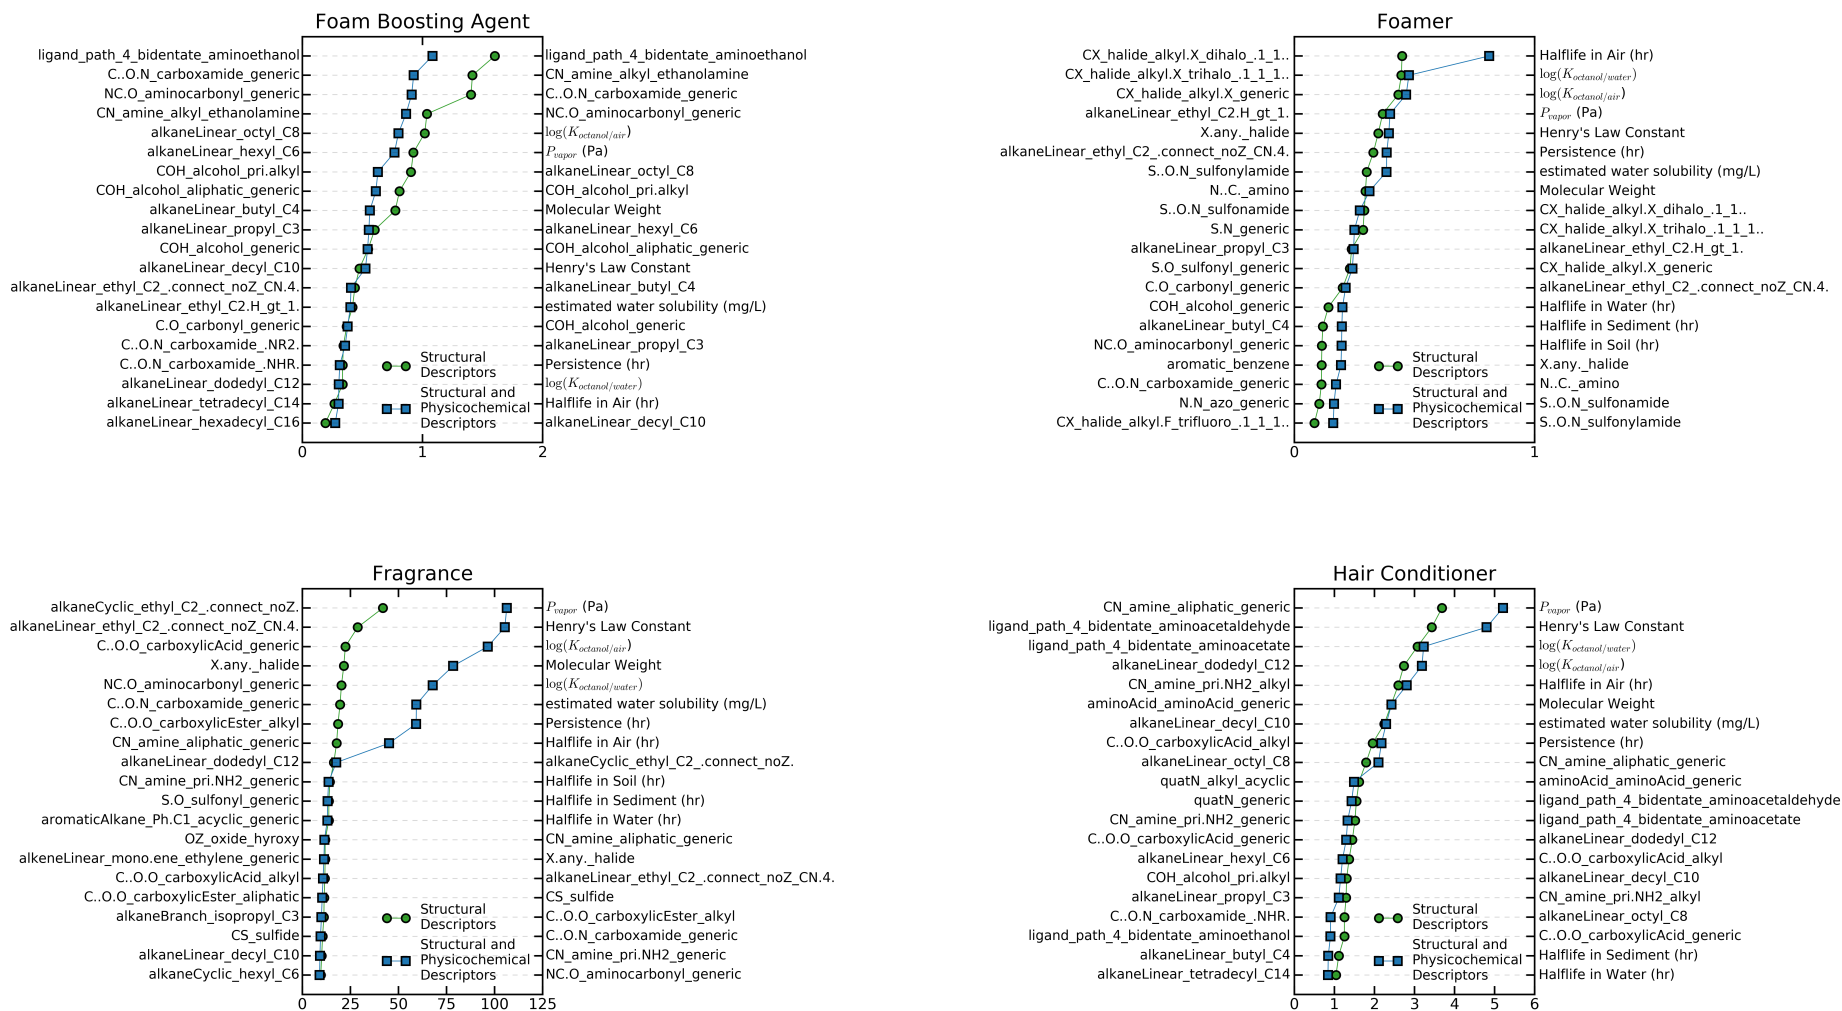

SI Figure 5: Most important variables for foam boosting agent, foamer, fragrance, and hair conditioner QSUR models.

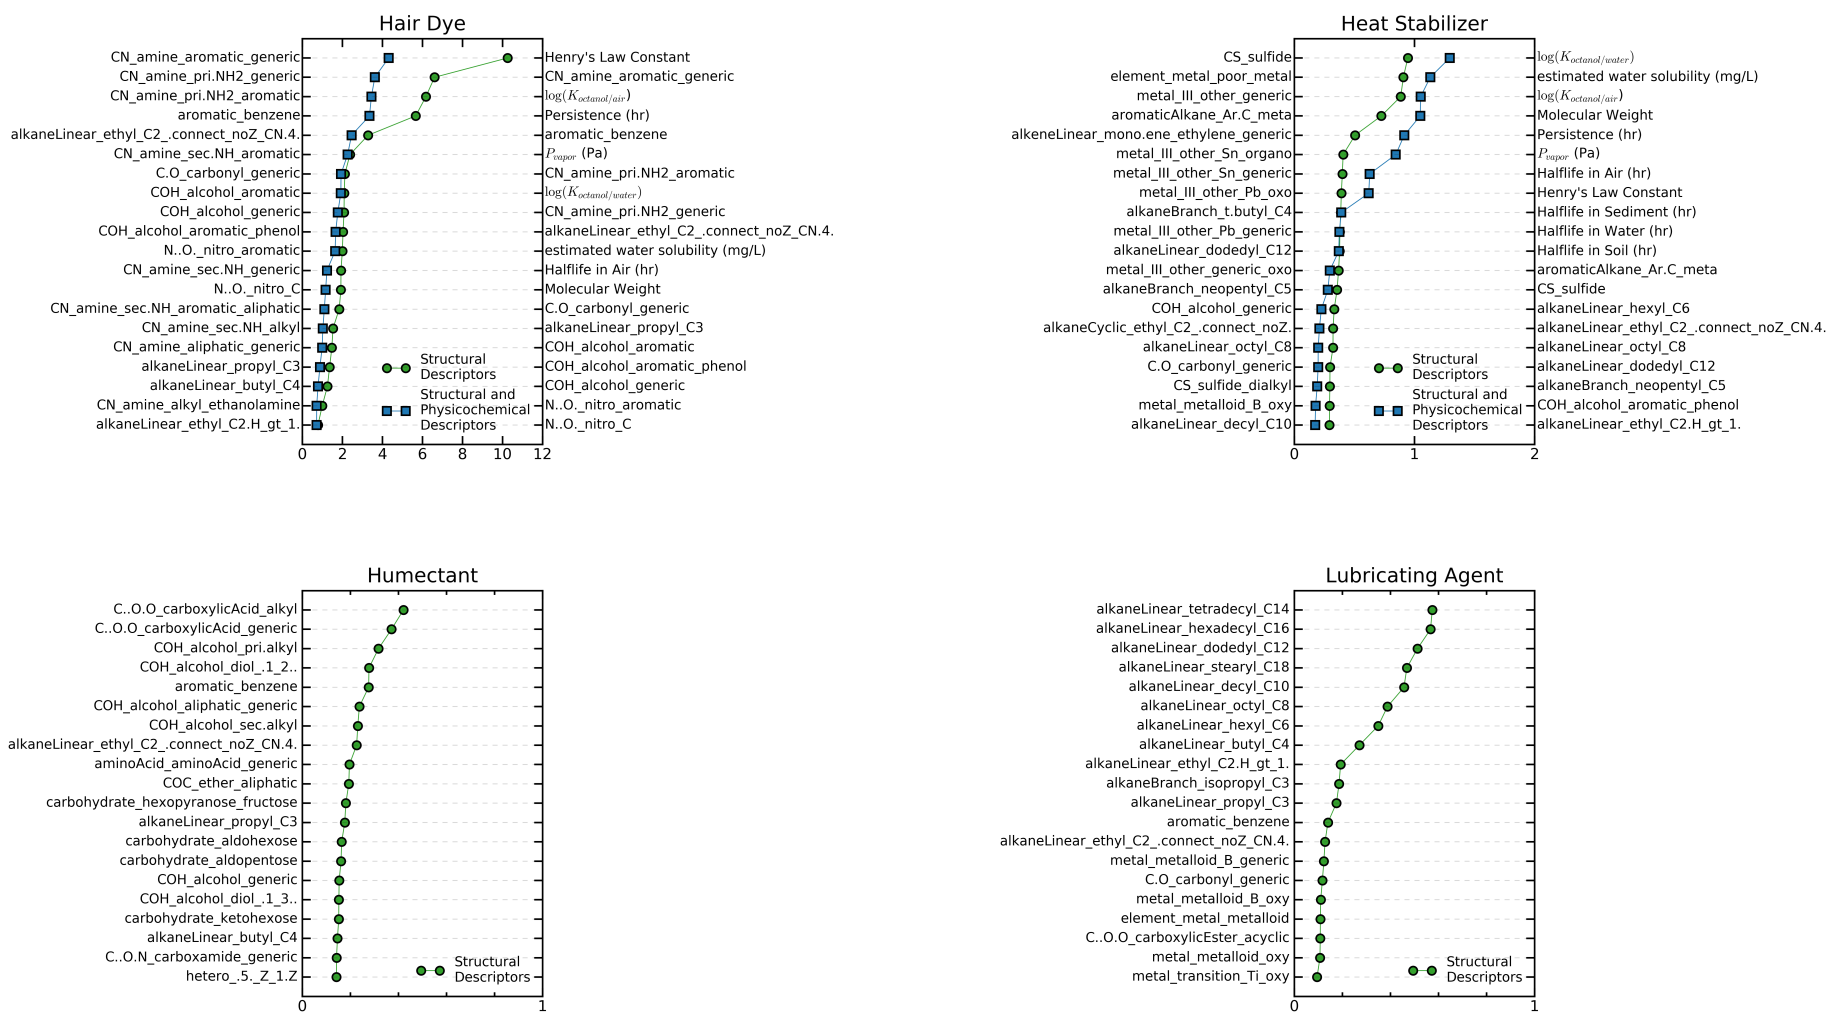

SI Figure 6: Most important variables for hair dye, heat stabilizer, humectant, and lubricating agent QSUR models.

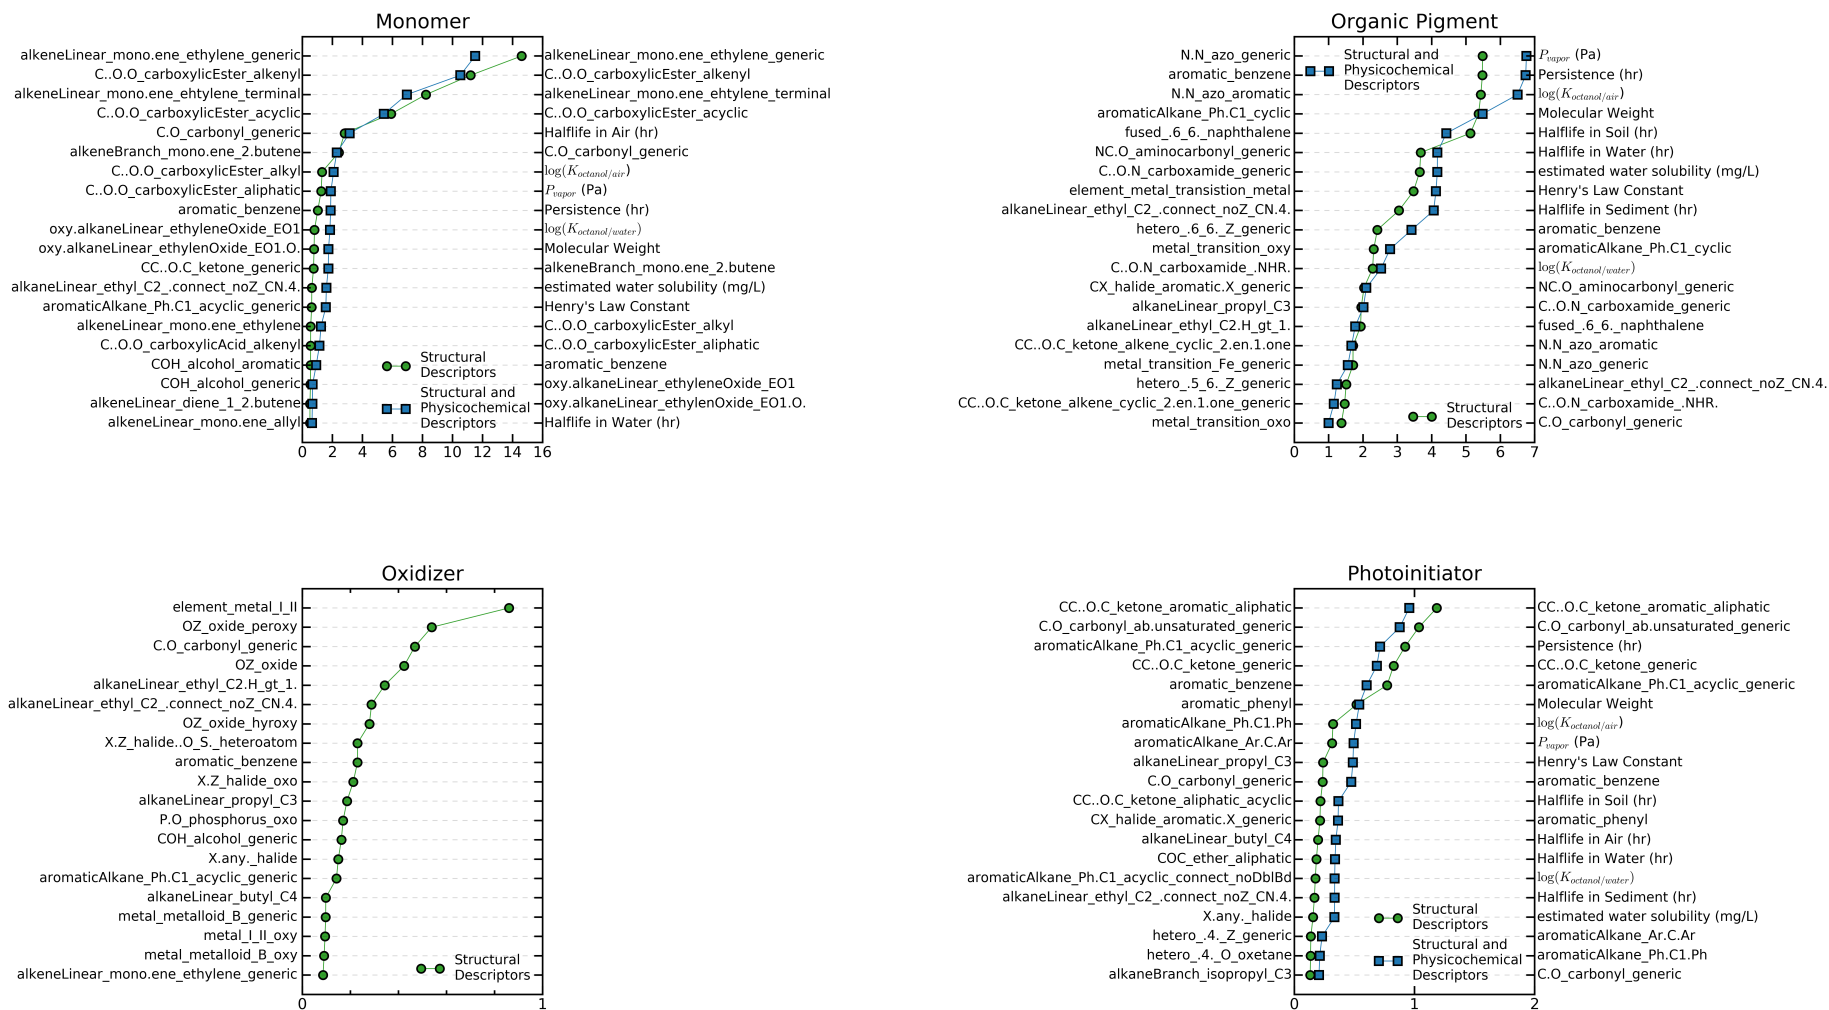

SI Figure 7: Most important variables for valid monomer, organic pigment, oxidizer, and photoinitiator QSUR models.

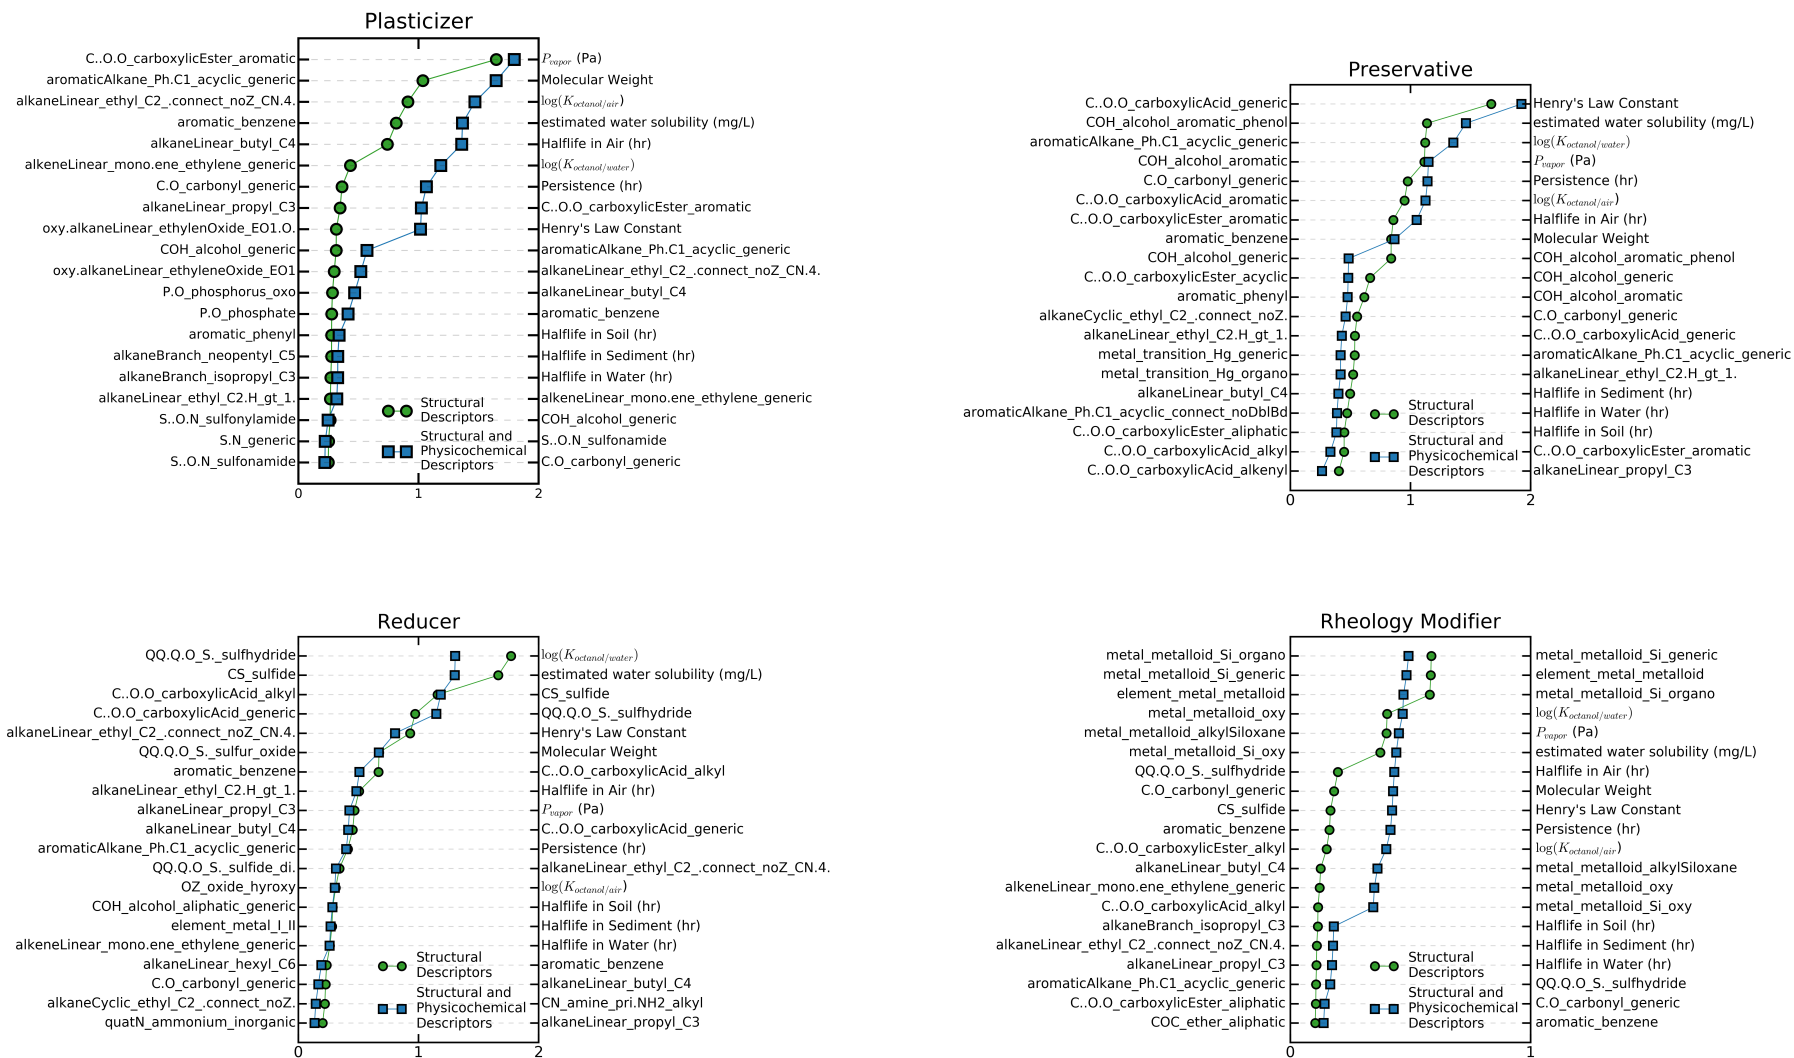

SI Figure 8: Most important variables for plasticizer, preservative, reducer, and rheology modifier QSUR models.

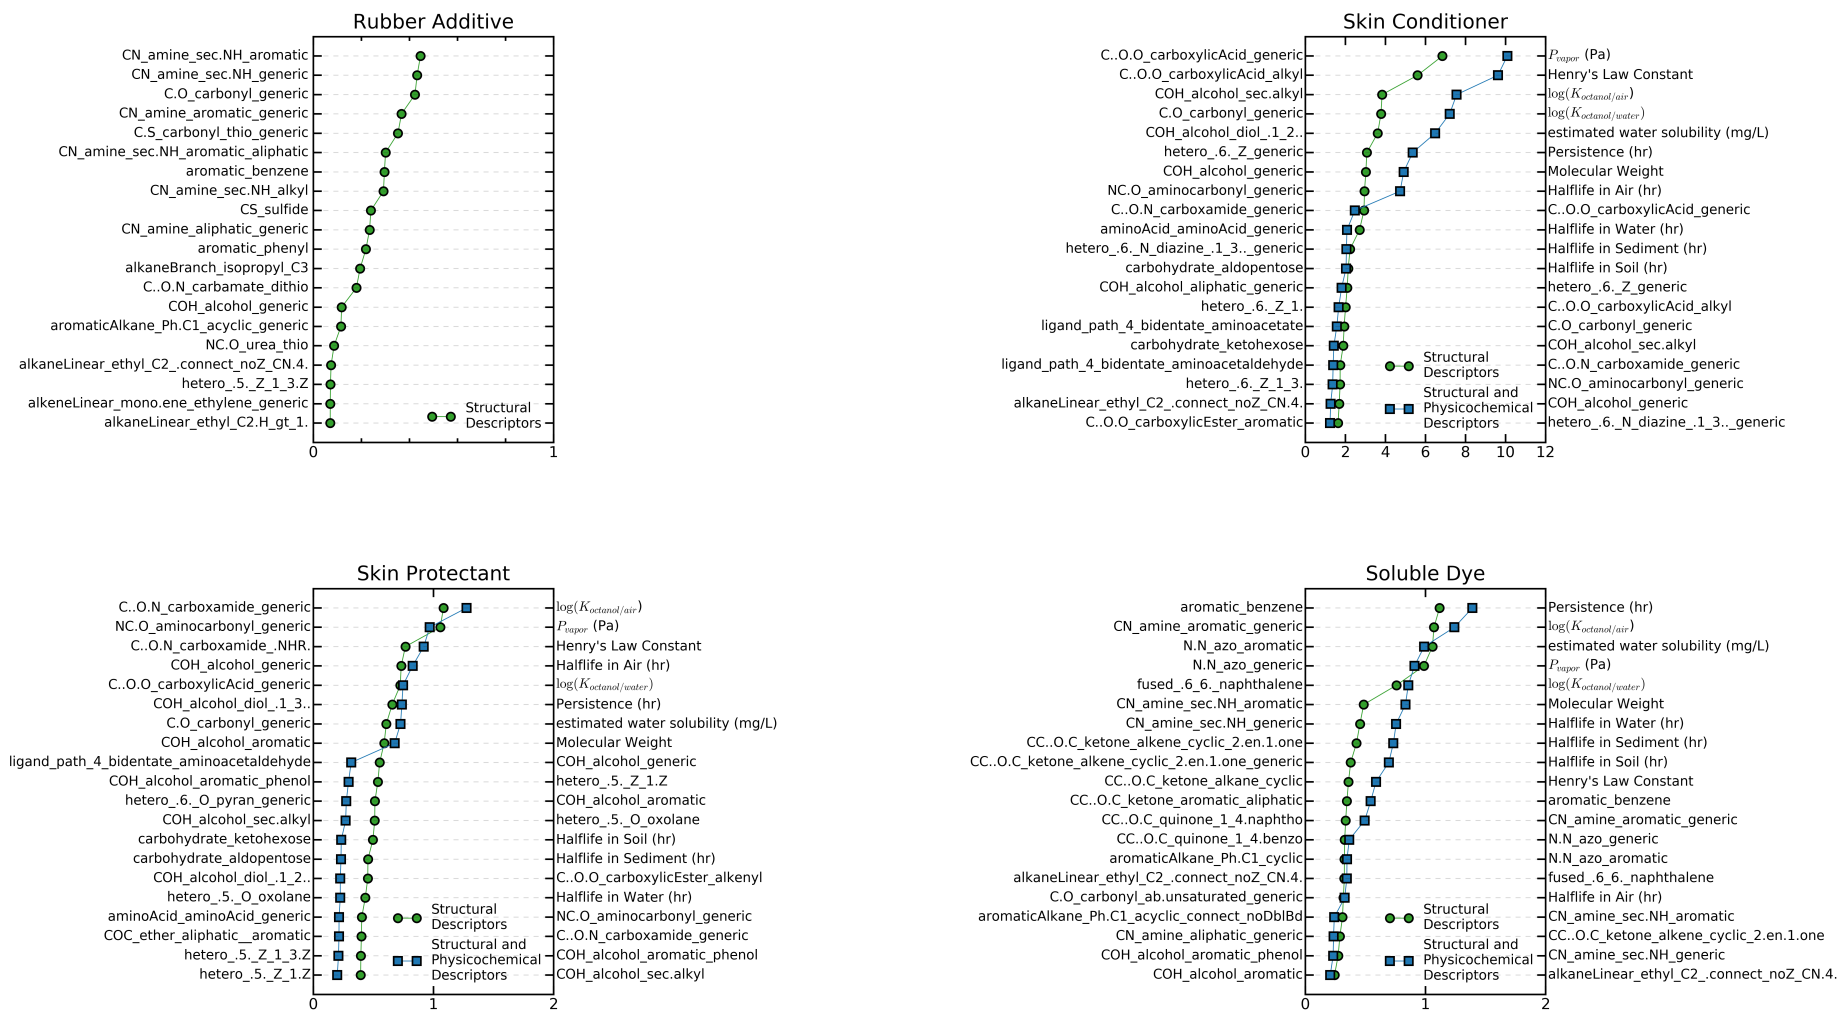

SI Figure 9: Most important variables for rubber additive, skin conditioner, skin protectant, and soluble dye QSUR models.

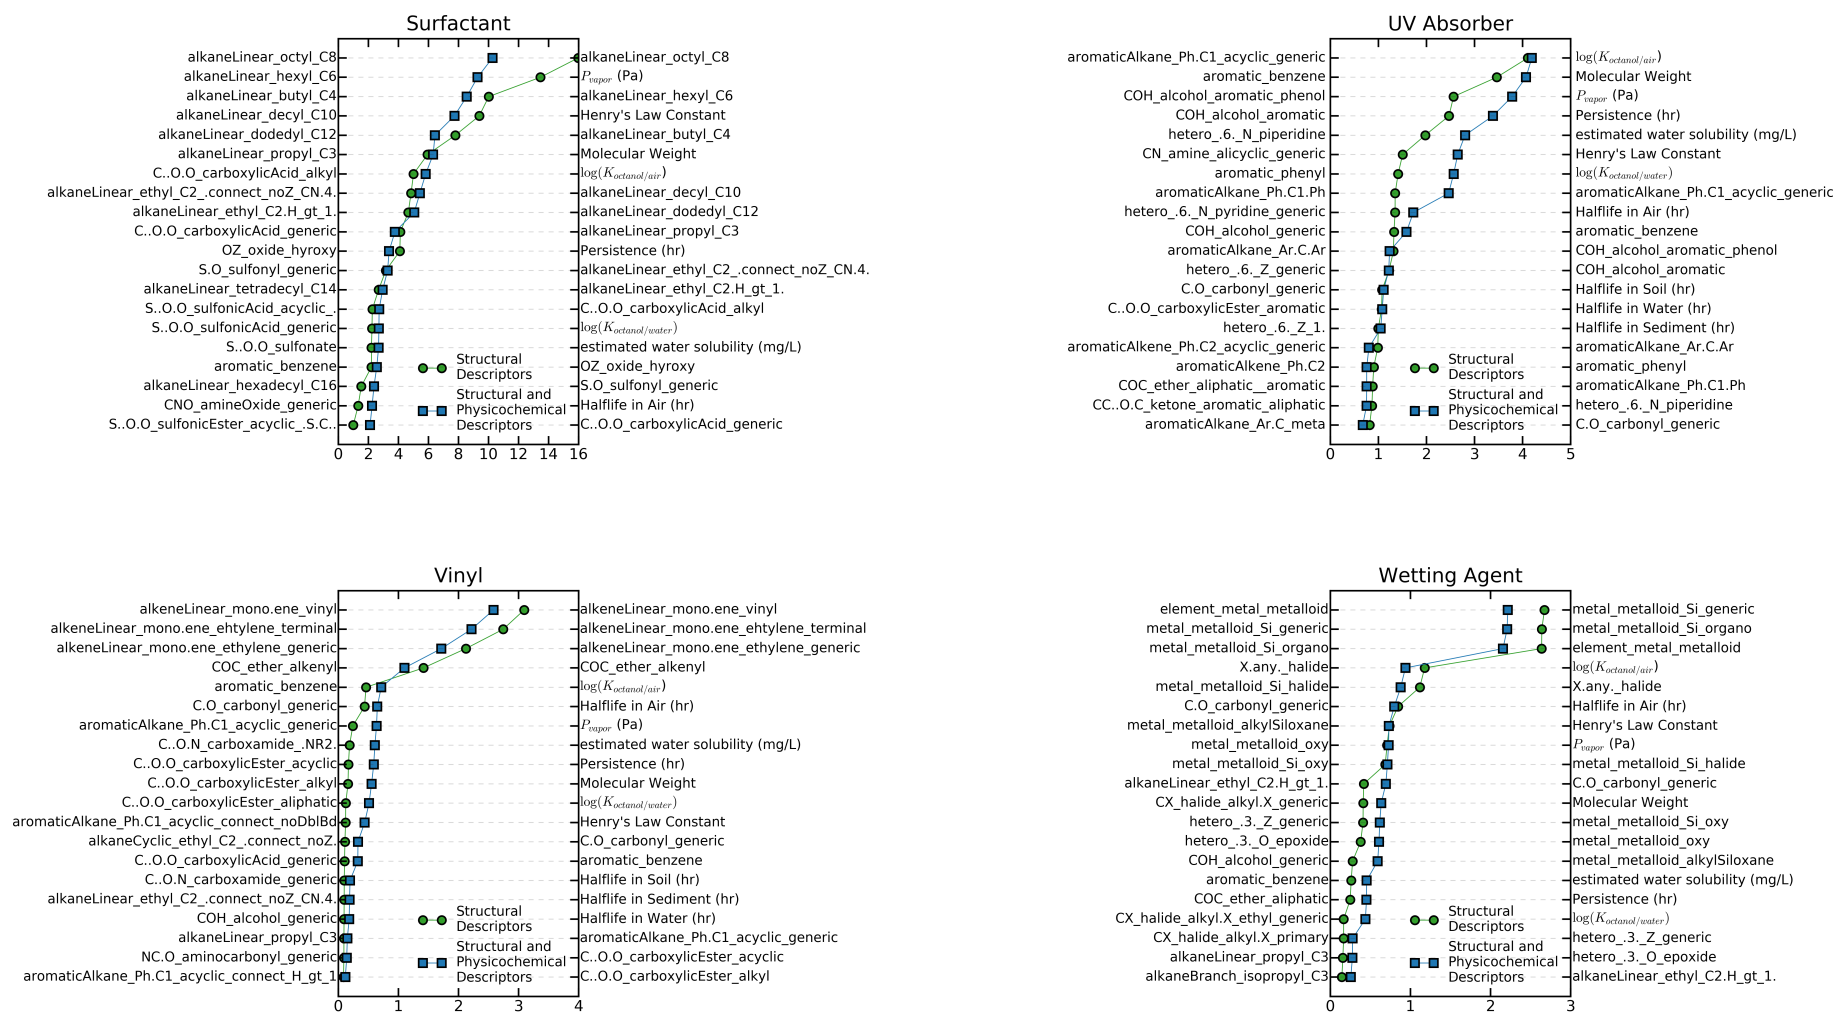

SI Figure 10: Most important variables for surfactant, UV absorber, vinyl, and wetting agent QSUR models.



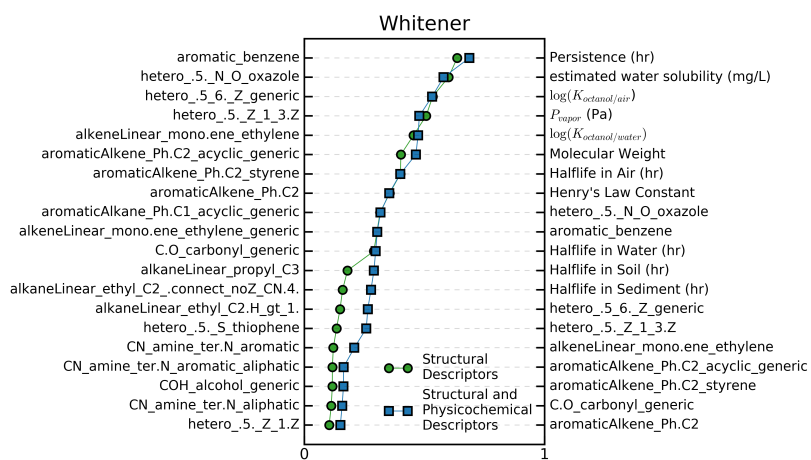

SI Figure 11: Most important variables for whitener QSUR model.
