# Supplementary material for: High-throughput screening of chemicals as functional substitutes using structure-based classification models
Source: Royal Society of Chemistry journal article supplement (doi:10.1039/c6gc02744j), 2016-12-20
Supplement: c6gc02744j2.xlsx [file c6gc02744j2.xlsx]

## Sheet: SI Table 1
casrn	chemical_name	reported_functions	heirarchical_cluster_number	harmonized_function	structure_smiles_2d_qsar
50-14-6	Ergocalciferol	skin conditioner	1	skin conditioner	CC(C)C(C)\C=C\C(C)C1CCC2\C(CCCC12C)=C\C=C1\CC(O)CCC1=C
50-69-1	D-Ribose	skin conditioner|humectant	1	skin conditioner	OCC(O)C(O)C(O)C=O
50-89-5	Thymidine	skin conditioner	1	skin conditioner	CC1=CN(C2CC(O)C(CO)O2)C(=O)NC1=O
53-84-9	Nadide	skin conditioner	1	skin conditioner	NC(=O)c1ccc[n+](c1)C1OC(COP(O)(=O)OP(O)(=O)OCC2OC(C(O)C2O)n2cnc3c(N)ncnc23)C(O)C1O
54-47-7	Pyridoxal phosphate	skin conditioner	1	skin conditioner	CC1=C(O)C(C=O)=C(COP(O)(O)=O)C=N1
56-65-5	Adenosine triphosphate	skin conditioner	1	skin conditioner	Nc1ncnc2n(cnc12)C1OC(COP(O)(=O)OP(O)(=O)OP(O)(O)=O)C(O)C1O
56-69-9		skin conditioner	1	skin conditioner
56-86-0	L-Glutamic acid	humectant|hair conditioner|antistatic agent	1	skin conditioner	NC(CCC(O)=O)C(O)=O
57-00-1	Creatine	skin conditioner	1	skin conditioner	CN(CC(O)=O)C(N)=N
57-87-4		skin conditioner	1	skin conditioner
58-55-9	Theophylline	tonic|skin conditioner	1	skin conditioner	CN1C2=C(NC=N2)C(=O)N(C)C1=O
58-61-7	Adenosine	skin conditioner	1	skin conditioner	Nc1ncnc2n(cnc12)C1OC(CO)C(O)C1O
59-23-4	Galactose	skin conditioner	1	skin conditioner	OCC1OC(O)C(O)C(O)C1O
59-30-3	Folic acid	skin conditioner	1	skin conditioner	NC1=NC(=O)c2nc(CNc3ccc(cc3)C(=O)NC(CCC(O)=O)C(O)=O)cnc2N1
60-27-5	Creatinine	skin conditioner	1	skin conditioner	CN1CC(=O)NC1=N
60-81-1	Phlorizin	skin conditioner	1	skin conditioner	OCC1OC(Oc2cc(O)cc(O)c2C(=O)CCc2ccc(O)cc2)C(O)C(O)C1O
60-92-4	cAMP	skin conditioner	1	skin conditioner	Nc1ncnc2n(cnc12)C1OC2COP(O)(=O)OC2C1O
61-19-8	Adenosine-5-phosphate	skin conditioner	1	skin conditioner	Nc1ncnc2n(cnc12)C1OC(COP(O)(O)=O)C(O)C1O
63-42-3	Lactose	skin conditioner|humectant	1	skin conditioner	OCC1OC(OC2C(O)C(O)C(O)OC2CO)C(O)C(O)C1O
65-71-4	Thymine	skin conditioner	1	skin conditioner	CC1C=NC(=O)NC1=O
65-82-7		skin conditioner	1	skin conditioner
65-86-1	Orotic acid	skin conditioner	1	skin conditioner	OC(=O)C1=CC(O)=NC(O)=N1
66-22-8	Uracil	skin conditioner	1	skin conditioner	O=C1CC=NC(=O)N1
68-19-9		skin conditioner	1	skin conditioner
68-26-8	Retinol	skin conditioner	1	skin conditioner	C\C(=C/CO)\C=C\C=C(/C)\C=C\C1=C(C)CCCC1(C)C
69-79-4	Maltose	skin conditioner|moisturizer|masking agent	1	skin conditioner	OCC1OC(OC2C(O)C(O)C(O)OC2CO)C(O)C(O)C1O
69-89-6	Xanthine	skin conditioner	1	skin conditioner	O=C1NC2=C(NC=N2)C(=O)N1
70-26-8		skin conditioner	1	skin conditioner
71-00-1	Histidine	skin conditioner|humectant|flavorant|antistatic agent	1	skin conditioner	NC(Cc1cnc[nH]1)C(O)=O
71-30-7	Cytosine	skin conditioner	1	skin conditioner	NC1=NC(=O)N=CC1
71-44-3	1,4-Butanediamine, N,N'-bis(3-aminopropyl)-	skin conditioner	1	skin conditioner	NCCCNCCCCNCCCN
73-24-5	Adenine	skin conditioner	1	skin conditioner	NC1=NC=NC2=C1N=CN2
79-81-2	Retinol palmitate	skin conditioner	1	skin conditioner	CCCCCCCCCCCCCCCC(=O)OC\C=C(/C)\C=C\C=C(/C)\C=C\C1=C(C)CCCC1(C)C
80-73-9	N,N'-Dimethylimidazolidinone	skin conditioner|humectant|hair conditioner	1	skin conditioner	CN1CCN(C)C1=O
85-32-5	5'-Guanylic acid	skin conditioner|humectant|flavorant|emollient	1	skin conditioner	NC1=Nc2c(ncn2C2OC(COP(O)(O)=O)C(O)C2O)C(=O)N1
87-51-4	Indole-3-acetic acid	skin conditioner	1	skin conditioner	OC(=O)CC1=CNC2=C1C=CC=C2
87-89-8	myo-Inositol	humectant|hair conditioner|antistatic agent	1	skin conditioner	OC1C(O)C(O)C(O)C(O)C1O
87-99-0	Xylitol	skin conditioner|humectant	1	skin conditioner	OCC(O)C(O)C(O)CO
89-73-6	Salicylhydroxamic acid	skin conditioner|chelator	1	skin conditioner	ONC(=O)C1=C(O)C=CC=C1
93-03-8	Benzenemethanol, 3,4-dimethoxy-	skin conditioner	1	skin conditioner	COC1=C(OC)C=C(CO)C=C1
94-44-0	Benzyl nicotinate	skin conditioner|antistatic agent	1	skin conditioner	O=C(OCC1=CC=CC=C1)C1=CN=CC=C1
98-88-4	Benzoyl chloride	skin conditioner	1	skin conditioner	ClC(=O)C1=CC=CC=C1
99-06-9	3-Hydroxybenzoic acid	skin conditioner	1	skin conditioner	OC(=O)C1=CC(O)=CC=C1
99-18-3		skin conditioner	1	skin conditioner
99-26-3		skin conditioner	1	skin conditioner
100-26-5	2,5-Pyridinedicarboxylic acid	skin conditioner	1	skin conditioner	OC(=O)C1=CC=C(N=C1)C(O)=O
102-37-4		skin conditioner	1	skin conditioner
103-90-2	Acetaminophen	skin conditioner	1	skin conditioner	CC(=O)NC1=CC=C(O)C=C1
107-43-7	Betaine	viscosity controlling agent|skin conditioner|humectant|hair conditioner|antistatic agent	1	skin conditioner	C[N+](C)(C)CC(O)=O
107-46-0	Hexamethyldisiloxane	skin conditioner|antifoaming agent	1	skin conditioner	C[Si](C)(C)O[Si](C)(C)C
107-51-7	Octamethyltrisiloxane	skin conditioner|antifoaming agent	1	skin conditioner	C[Si](C)(C)O[Si](C)(C)O[Si](C)(C)C
107-97-1	N-Methylglycine	skin conditioner	1	skin conditioner	CNCC(O)=O
112-86-7	(13Z)-Docos-13-enoic acid	skin conditioner	1	skin conditioner	CCCCCCCC\C=C\CCCCCCCCCCCC(O)=O
113-24-6	Sodium pyruvate	skin conditioner	1	skin conditioner	CC(=O)C(O)=O
115-84-4	2-Butyl-2-ethyl-1,3-propanediol	skin conditioner|humectant|diol	1	skin conditioner	CCCCC(CC)(CO)CO
116-31-4	Retinal	skin conditioner	1	skin conditioner	C\C(\C=C\C=C(/C)\C=C\C1=C(C)CCCC1(C)C)=C/C=O
117-68-0		skin conditioner|humectant|emollient	1	skin conditioner
118-00-3		skin conditioner|opacifier	1	skin conditioner
126-19-2		skin conditioner	1	skin conditioner
127-40-2	Lutein	skin conditioner	1	skin conditioner	C\C(\C=C\C=C(/C)\C=C\C1C(C)=CC(O)CC1(C)C)=C/C=C/C=C(\C)/C=C/C=C(\C)/C=C/C1=C(C)CC(O)CC1(C)C
127-47-9	Retinol acetate	skin conditioner	1	skin conditioner	CC(=O)OC\C=C(/C)\C=C\C=C(/C)\C=C\C1=C(C)CCCC1(C)C
130-40-5		skin conditioner	1	skin conditioner
131-99-7	Inosinic acid	skin conditioner|humectant|emollient	1	skin conditioner	OC1C(COP(O)(O)=O)CC(C1O)n1cnc2c1N=CNC2=O
138-52-3		skin conditioner	1	skin conditioner
138-59-0	Shikimic acid	skin conditioner|odor eliminator|antidandruff	1	skin conditioner	OC1CC(=CC(O)C1O)C(O)=O
141-01-5	Ferrous fumarate	skin conditioner	1	skin conditioner	OC(=O)\C=C\C(O)=O
142-71-2		skin conditioner	1	skin conditioner
150-19-6	3-Methoxyphenol	skin conditioner|flavorant	1	skin conditioner	COC1=CC=CC(O)=C1
154-87-0	Cocarboxylase chloride	skin conditioner	1	skin conditioner	CC1=C(CCOP(O)(=O)OP(O)(O)=O)SC=[N+]1CC1=CN=C(C)N=C1N
299-28-5		skin conditioner|oral care|humectant	1	skin conditioner
302-95-4	Sodium deoxycholate	skin conditioner	1	skin conditioner	CC(CCC(O)=O)C1CCC2C3CCC4CC(O)CCC4(C)C3CC(O)C12C
303-43-5		skin conditioner	1	skin conditioner
304-17-6	N-Isopropylphthalimide	skin conditioner	1	skin conditioner	CC(C)N1C(=O)C2=C(C=CC=C2)C1=O
305-01-1	Esculetin	skin conditioner	1	skin conditioner	OC1=C(O)C=C2C=CC(=O)OC2=C1
305-84-0		skin conditioner	1	skin conditioner
306-91-2	Tetracosafluorotetradecahydrophenanthrene	solvent|skin conditioner	1	skin conditioner	FC1(F)C(F)(F)C(F)(F)C2(F)C(F)(C1(F)F)C(F)(F)C(F)(F)C1(F)C(F)(F)C(F)(F)C(F)(F)C(F)(F)C21F
321-14-2	Benzoic acid, 5-chloro-2-hydroxy-	skin conditioner	1	skin conditioner	OC(=O)C1=C(O)C=CC(Cl)=C1
353-09-3	Guanidinopropionic acid	skin conditioner	1	skin conditioner	NC(N)=NCCC(O)=O
372-75-8		skin conditioner	1	skin conditioner
444-27-9	Timonacic	skin conditioner	1	skin conditioner	OC(=O)C1CSCN1
446-72-0	Genistein	skin conditioner	1	skin conditioner	OC1=CC=C(C=C1)C1=COC2=C(C(O)=CC(O)=C2)C1=O
471-53-4	Glycyrrhetinic acid	skin conditioner	1	skin conditioner	CC1(C)C(O)CCC2(C)C1CCC1(C)C2C(=O)C=C2C3CC(C)(CCC3(C)CCC12C)C(O)=O
472-11-7		skin conditioner	1	skin conditioner
472-15-1		skin conditioner	1	skin conditioner
472-61-7		skin conditioner	1	skin conditioner
473-98-3		skin conditioner	1	skin conditioner
475-81-0	D-Glaucine	skin conditioner	1	skin conditioner	COc1cc2CC3N(C)CCc4cc(OC)c(OC)c(-c2cc1OC)c34
476-32-4		skin conditioner	1	skin conditioner
476-66-4	Ellagic acid	skin conditioner	1	skin conditioner	OC1=CC2=C3C(OC(=O)C4=CC(O)=C(O)C(OC2=O)=C34)=C1O
477-32-7		skin conditioner	1	skin conditioner
477-90-7	Bergenin	skin conditioner	1	skin conditioner	COc1c(O)cc2C(=O)OC3C(O)C(O)C(CO)OC3c2c1O
479-18-5	Dyphylline	skin conditioner	1	skin conditioner	CN1C2=C(N(CC(O)CO)C=N2)C(=O)N(C)C1=O
479-66-3		skin conditioner	1	skin conditioner
480-40-0	Chrysin	skin conditioner	1	skin conditioner	OC1=CC2=C(C(O)=C1)C(=O)C=C(O2)C1=CC=CC=C1
480-41-1	Naringenin	skin conditioner	1	skin conditioner	OC1=CC=C(C=C1)C1CC(=O)C2=C(O1)C=C(O)C=C2O
484-12-8	Osthole	skin conditioner	1	skin conditioner	COC1=C(CC=C(C)C)C2=C(C=CC(=O)O2)C=C1
486-35-1	Daphnetin	skin conditioner	1	skin conditioner	OC1=C(O)C2=C(C=CC(=O)O2)C=C1
490-79-9	Benzoic acid, 2,5-dihydroxy-	skin conditioner	1	skin conditioner	OC(=O)C1=C(O)C=CC(O)=C1
491-70-3	Luteolin	skin conditioner	1	skin conditioner	OC1=CC(O)=C2C(=O)C=C(OC2=C1)C1=CC(O)=C(O)C=C1
498-40-8	L-Alanine, 3-sulfo-	skin conditioner	1	skin conditioner	NC(CS(O)(=O)=O)C(O)=O
499-89-8	Thujic acid	skin conditioner	1	skin conditioner	CC1(C)C=CC=C(C=C1)C(O)=O
508-02-1	Oleanic acid	skin conditioner	1	skin conditioner
512-69-6	Raffinose	skin conditioner	1	skin conditioner	OCC1OC(CO)(OC2OC(COC3OC(CO)C(O)C(O)C3O)C(O)C(O)C2O)C(O)C1O
517-88-4		skin conditioner	1	skin conditioner
518-34-3		skin conditioner	1	skin conditioner
518-82-1	Emodin	skin conditioner	1	skin conditioner	CC1=CC(O)=C2C(=O)C3=C(O)C=C(O)C=C3C(=O)C2=C1
520-33-2	Hesperetin	skin conditioner|flavorant|antioxidant	1	skin conditioner	COc1ccc(cc1O)C1CC(=O)c2c(O)cc(O)cc2O1
521-13-1		skin conditioner	1	skin conditioner
525-79-1	Kinetin	skin conditioner	1	skin conditioner	C(NC1=C2N=CN=C2N=CN1)C1=CC=CO1
529-05-5	Chamazulene	skin conditioner	1	skin conditioner	CCC1=CC2=C(C)C=CC2=C(C)C=C1
532-43-4	Thiamine nitrate	skin conditioner	1	skin conditioner	CC1=C(CCO)SC=[N+]1CC1=CN=C(C)N=C1N
533-75-5	Tropolone	skin conditioner	1	skin conditioner	O=C1CC=CC=CC1=O
537-32-6		skin conditioner|moisturizer|humectant	1	skin conditioner
537-55-3	N-Acetyl-L-tyrosine	tanning agent|skin conditioner	1	skin conditioner	CC(=O)NC(Cc1ccc(O)cc1)C(O)=O
553-60-6	3-Pyridinecarboxylic acid, 1-methylethyl ester	skin conditioner|flavorant	1	skin conditioner	CC(C)OC(=O)C1=CC=CN=C1
582-46-7		skin conditioner	1	skin conditioner
584-03-2	1,2-Butanediol	viscosity controlling agent|solvent|skin conditioner|humectant	1	skin conditioner	CCC(O)CO
584-85-0		skin conditioner|humectant|antioxidant	1	skin conditioner
585-86-4	Lactitol	skin conditioner|humectant	1	skin conditioner	OCC(O)C(O)C(OC1OC(CO)C(O)C(O)C1O)C(O)CO
617-73-2		skin conditioner	1	skin conditioner
621-23-8	1,3,5-Trimethoxybenzene	skin conditioner	1	skin conditioner	COC1=CC(OC)=CC(OC)=C1
623-05-2	4-Hydroxybenzenemethanol	skin conditioner|flavorant	1	skin conditioner	OCC1=CC=C(O)C=C1
623-96-1	Carbonic acid, dipropyl ester	skin conditioner	1	skin conditioner	CCCOC(=O)OCCC
629-54-9	Palmitamide	skin conditioner	1	skin conditioner	CCCCCCCCCCCCCCCC(N)=O
631-88-9		skin conditioner	1	skin conditioner
631-89-0		skin conditioner	1	skin conditioner
638-23-3	S-(Carboxymethyl)-L-cysteine	skin conditioner|antiseborrheic	1	skin conditioner	NC(CSCC(O)=O)C(O)=O
652-37-9	Acephylline	skin conditioner	1	skin conditioner	CN1C2=C(N(CC(O)=O)C=N2)C(=O)N(C)C1=O
752-13-6		skin conditioner	1	skin conditioner
752-56-7	Riboflavin tetrabutyrate	skin conditioner	1	skin conditioner	CCCC(=O)OCC(OC(=O)CCC)C(OC(=O)CCC)C(CN1C2=NC(=O)NC(=O)C2=Nc2cc(C)c(C)cc12)OC(=O)CCC
765-01-5		skin conditioner	1	skin conditioner
816-94-4	1,2-Distearoyl-sn-3-phosphacholine	skin conditioner	1	skin conditioner	CCCCCCCCCCCCCCCCCC(=O)OCC(COP(O)(=O)OCC[N+](C)(C)C)OC(=O)CCCCCCCCCCCCCCCCC
831-61-8	Benzoic acid, 3,4,5-trihydroxy-, ethyl ester	skin conditioner	1	skin conditioner	CCOC(=O)C1=CC(O)=C(O)C(O)=C1
840-65-3	Dimethyl 2,6-naphthalenedicarboxylate	skin conditioner	1	skin conditioner	COC(=O)C1=CC2=C(C=C1)C=C(C=C2)C(=O)OC
910-31-6		skin conditioner	1	skin conditioner
922-50-9		skin conditioner	1	skin conditioner
924-49-2	4-Amino-3-hydroxybutyric acid	skin conditioner	1	skin conditioner	NCC(O)CC(O)=O
929-77-1	Methyl behenate	skin conditioner|humectant	1	skin conditioner	CCCCCCCCCCCCCCCCCCCCCC(=O)OC
987-65-5		skin conditioner	1	skin conditioner
1069-29-0		skin conditioner|antistatic agent	1	skin conditioner
1071-28-9	Aminopropyl dihydrogen phosphate	skin conditioner	1	skin conditioner	NCCCOP(O)(O)=O
1115-47-5	N-Acetyl-methionine	skin conditioner	1	skin conditioner	CSCCC(NC(C)=O)C(O)=O
1115-63-5	Monopotassium aspartate	skin conditioner	1	skin conditioner	NC(CC(O)=O)C(O)=O
1117-86-8	1,2-Octanediol	skin conditioner|humectant|hair conditioner|emollient	1	skin conditioner	CCCCCCC(O)CO
1119-34-2		skin conditioner	1	skin conditioner
1119-86-4		skin conditioner	1	skin conditioner
1188-37-0	N-Acetyl-L-glutamic acid	skin conditioner	1	skin conditioner	CC(=O)NC(CCC(O)=O)C(O)=O
1197-18-8	Tranexamic acid	skin conditioner|astringent	1	skin conditioner	NCC1CCC(CC1)C(O)=O
1318-00-9		skin conditioner|humectant|hair conditioner	1	skin conditioner
1319-45-5		skin conditioner	1	skin conditioner
1319-53-5		skin conditioner	1	skin conditioner
1320-51-0	(Hydroxyethyl)urea	skin conditioner|humectant|hair conditioner	1	skin conditioner	NC(=O)NCCO
1322-29-8		skin conditioner	1	skin conditioner
1405-86-3	Glycyrrhizin	skin conditioner|humectant|flavorant	1	skin conditioner	CC1(C)C(CCC2(C)C1CCC1(C)C2C(=O)C=C2C3CC(C)(CCC3(C)CCC12C)C(O)=O)OC1OC(C(O)C(O)C1OC1OC(C(O)C(O)C1O)C(O)=O)C(O)=O
1406-16-2		skin conditioner	1	skin conditioner
1415-93-6		skin conditioner	1	skin conditioner
1453-82-3	Isonicotinamide	skin conditioner	1	skin conditioner	NC(=O)C1=CC=NC=C1
1637-39-4	trans-Zeatin	skin conditioner	1	skin conditioner	C\C(CO)=C/CNC1=NC=NC2=C1N=CN2
1679-53-4	10-Hydroxydecanoic acid	skin conditioner	1	skin conditioner	OCCCCCCCCCC(O)=O
1699-51-0		skin conditioner	1	skin conditioner
1805-22-7	Cyclopentane, nonafluoro(trifluoromethyl)-	solvent|skin conditioner	1	skin conditioner	FC(F)(F)C1(F)C(F)(F)C(F)(F)C(F)(F)C1(F)F
1882-26-4	Pyricarbate	skin conditioner|chelator	1	skin conditioner	CNC(=O)OCC1=CC=CC(COC(=O)NC)=N1
1921-70-6		skin conditioner	1	skin conditioner
1935-18-8		skin conditioner	1	skin conditioner
1949-15-1		skin conditioner|odor eliminator	1	skin conditioner
1987-71-9		skin conditioner	1	skin conditioner
2043-43-8		skin conditioner	1	skin conditioner
2061-64-5		skin conditioner|humectant|bleach	1	skin conditioner
2068-80-6		skin conditioner	1	skin conditioner
2150-47-2	Methyl 2,4-dihydroxybenzoate	skin conditioner	1	skin conditioner	COC(=O)C1=CC=C(O)C=C1O
2364-67-2		skin conditioner	1	skin conditioner
2407-02-1		skin conditioner|humectant|emollient	1	skin conditioner
2425-77-6	2-Hexyl-1-decanol	solvent|skin conditioner|humectant	1	skin conditioner	CCCCCCCCC(CO)CCCCCC
2438-80-4		skin conditioner	1	skin conditioner
2456-28-2	Decane, 1,1'-oxybis-	skin conditioner	1	skin conditioner	CCCCCCCCCCOCCCCCCCCCC
2457-80-9	5'-Methylthioadenosine	skin conditioner	1	skin conditioner	CSCC1OC(C(O)C1O)n1cnc2c(N)ncnc12
2480-26-4	Methylserine	skin conditioner	1	skin conditioner	CNC(CO)C(O)=O
2490-97-3	Nalpha-Acetyl-L-glutamine	skin conditioner	1	skin conditioner	CC(=O)NC(CCC(N)=O)C(O)=O
2782-04-9		skin conditioner	1	skin conditioner
2864-50-8		skin conditioner	1	skin conditioner
2984-55-6		skin conditioner	1	skin conditioner
3081-61-6	Theanine	skin conditioner|humectant|emollient	1	skin conditioner	CCNC(=O)CCC(N)C(O)=O
3164-34-9		skin conditioner	1	skin conditioner
3184-13-2	L-Ornithine monohydrochloride	skin conditioner	1	skin conditioner	NCCCC(N)C(O)=O
3351-86-8		skin conditioner	1	skin conditioner
3387-36-8		skin conditioner	1	skin conditioner
3390-81-6		skin conditioner	1	skin conditioner
3397-65-7	L-Glutamic acid, N-(1-oxododecyl)-	skin conditioner	1	skin conditioner	CCCCCCCCCCCC(=O)NC(CCC(O)=O)C(O)=O
3522-50-7	Iron(III) citrate	skin conditioner	1	skin conditioner	OC(=O)CC(O)(CC(O)=O)C(O)=O
3571-88-8		skin conditioner	1	skin conditioner
3632-91-5		skin conditioner	1	skin conditioner
3789-85-3		skin conditioner	1	skin conditioner
4070-43-3	4-Ethyl hydrogen L-aspartate	skin conditioner|antistatic agent	1	skin conditioner	CCOC(=O)C(N)CC(O)=O
4261-80-7		skin conditioner|humectant	1	skin conditioner
4316-74-9	Sodium 2-(methylamino)ethanesulfonate	skin conditioner	1	skin conditioner	CNCCS(O)(=O)=O
4386-03-2	2-Carboxyethyl gamma-aminobutyric acid	skin conditioner	1	skin conditioner	OC(=O)CCCNCCC(O)=O
4437-85-8	Butylene carbonate	solvent|skin conditioner	1	skin conditioner	CCC1COC(=O)O1
4468-02-4		skin conditioner|odor eliminator	1	skin conditioner
4542-57-8	Didodecyl ether	skin conditioner	1	skin conditioner	CCCCCCCCCCCCOCCCCCCCCCCCC
4618-18-2	Lactulose	skin conditioner|humectant	1	skin conditioner	OCC1OC(O)(CO)C(O)C1OC1OC(CO)C(O)C(O)C1O
4691-65-0	Disodium inosinate	skin conditioner|humectant|emollient	1	skin conditioner	OC1C(COP(O)(O)=O)OC(C1O)n1cnc2c1N=CNC2=O
4827-59-2	Glycyrrhetinyl stearate	skin conditioner|humectant	1	skin conditioner	CCCCCCCCCCCCCCCCCC(=O)OC1CCC2(C)C(CCC3(C)C2C(=O)C=C2C4CC(C)(CCC4(C)CCC32C)C(O)=O)C1(C)C
4857-44-7		skin conditioner	1	skin conditioner
4934-42-3		skin conditioner|humectant	1	skin conditioner
5080-50-2	Acetyl-L-carnitine hydrochloride	skin conditioner	1	skin conditioner	CC(=O)OC(CC(O)=O)C[N+](C)(C)C
5244-34-8	Ethanol, 2,2'-[1,2-ethanediylbis(thio)]bis-	skin conditioner	1	skin conditioner	OCCSCCSCCO
5343-92-0		solvent|skin conditioner	1	skin conditioner
5393-81-7		skin conditioner	1	skin conditioner
5412-98-6	Dimyristyl ether	skin conditioner	1	skin conditioner	CCCCCCCCCCCCCCOCCCCCCCCCCCCCC
5422-34-4		skin conditioner|humectant|hair conditioner|antistatic agent	1	skin conditioner
5423-22-3		skin conditioner	1	skin conditioner
5508-58-7	Andrographolide	skin conditioner	1	skin conditioner	CC1(CO)C(O)CCC2(C)C(C\C=C3\C(O)COC3=O)C(=C)CCC12
5550-12-9	Disodium guanylate	skin conditioner|humectant|emollient	1	skin conditioner	NC1=Nc2c(ncn2C2OC(COP(O)(O)=O)C(O)C2O)C(=O)N1
5743-17-9	Caffeine, sodium benzoate drug combination	skin conditioner	1	skin conditioner	CN1C=NC2=C1C(=O)N(C)C(=O)N2C
5819-47-6		skin conditioner|humectant	1	skin conditioner
6000-44-8		skin conditioner	1	skin conditioner
6020-87-7	Creatine monohydrate	skin conditioner	1	skin conditioner	CN(CC(O)=O)C(N)=N
6066-82-6	2,5-Pyrrolidinedione, 1-hydroxy-	skin conditioner	1	skin conditioner	ON1C(=O)CCC1=O
6147-11-1	Mangostin	skin conditioner	1	skin conditioner	COC1=C(CC=C(C)C)C2=C(OC3=C(C(O)=C(CC=C(C)C)C(O)=C3)C2=O)C=C1O
6164-87-0		skin conditioner	1	skin conditioner
6297-03-6		skin conditioner	1	skin conditioner
6336-28-3		skin conditioner	1	skin conditioner
6485-39-8		skin conditioner	1	skin conditioner
6645-46-1		skin conditioner|humectant	1	skin conditioner
6754-58-1		skin conditioner	1	skin conditioner
6809-52-5	Teprenone	skin conditioner	1	skin conditioner	CC(C)=CCC\C(C)=C\CC\C(C)=C\CC\C(C)=C\CCC(C)=O
6860-47-5		skin conditioner|humectant	1	skin conditioner
6949-98-0		skin conditioner	1	skin conditioner
7069-42-3		skin conditioner	1	skin conditioner
7085-55-4	Troxerutin	skin conditioner	1	skin conditioner	CC1OC(OCC2OC(OC3=C(Oc4cc(OCCO)cc(O)c4C3=O)c3ccc(OCCO)c(OCCO)c3)C(O)C(O)C2O)C(O)C(O)C1O
7149-65-7		skin conditioner	1	skin conditioner
7170-76-5	2-Thiazolamine, 4,5-dimethyl-, monohydrobromide	skin conditioner	1	skin conditioner	CC1=C(C)N=C(N)S1
7332-49-2		skin conditioner|humectant	1	skin conditioner
7400-08-0	p-Hydroxycinnamic acid	skin conditioner	1	skin conditioner	OC(=O)\C=C\c1ccc(O)cc1
7447-39-4		skin conditioner	1	skin conditioner
7491-14-7		viscosity controlling agent|tonic|surfactant|skin conditioner|emollient	1	skin conditioner
7491-74-9	Piracetam	skin conditioner	1	skin conditioner	NC(=O)CN1CCCC1=O
7758-98-7		skin conditioner	1	skin conditioner
7773-01-5		skin conditioner	1	skin conditioner
7779-88-6		skin conditioner	1	skin conditioner
7782-44-7		skin conditioner	1	skin conditioner
7785-87-7		skin conditioner	1	skin conditioner
8000-44-0		skin conditioner|moisturizer|masking agent	1	skin conditioner
8001-73-8		skin conditioner	1	skin conditioner
8002-47-9		skin conditioner	1	skin conditioner
8006-84-6		tonic|soother|skin conditioner|fragrance|emollient	1	skin conditioner
8007-24-7		skin conditioner	1	skin conditioner
8007-78-1		skin conditioner|hair conditioner|astringent|antioxidant	1	skin conditioner
8008-99-9		skin conditioner	1	skin conditioner
8013-01-2		skin conditioner	1	skin conditioner
8016-13-5		skin conditioner	1	skin conditioner
8016-55-5		tonic|skin conditioner|emollient|astringent	1	skin conditioner
8016-70-4		viscosity controlling agent|skin conditioner|humectant|emollient	1	skin conditioner
8027-46-1		tonic|smoother|skin conditioner|astringent	1	skin conditioner
8031-67-2		skin conditioner	1	skin conditioner
8031-76-3		soother	1	skin conditioner
8049-98-7		skin conditioner	1	skin conditioner
8057-49-6		soother|skin conditioner|masking agent	1	skin conditioner
8057-54-3		skin conditioner	1	skin conditioner
9001-00-7		skin conditioner|keratolytic	1	skin conditioner
9001-33-6		skin conditioner	1	skin conditioner
9001-60-9		skin conditioner	1	skin conditioner
9001-63-2		skin conditioner	1	skin conditioner
9001-78-9		skin conditioner	1	skin conditioner
9002-10-2		skin conditioner	1	skin conditioner
9003-98-9		skin conditioner	1	skin conditioner
9004-61-9		skin conditioner|moisturizer|humectant|antistatic agent	1	skin conditioner
9005-12-3		skin conditioner|antifoaming agent	1	skin conditioner
9005-49-6		skin conditioner	1	skin conditioner
9005-79-2		skin conditioner|humectant	1	skin conditioner
9005-80-5		skin conditioner	1	skin conditioner
9007-43-6		skin conditioner	1	skin conditioner
9007-49-2		skin conditioner	1	skin conditioner
9007-58-3		smoother|skin conditioner	1	skin conditioner
9007-90-3		skin conditioner	1	skin conditioner
9008-02-0		skin conditioner	1	skin conditioner
9009-65-8		skin conditioner	1	skin conditioner
9028-54-0		skin conditioner	1	skin conditioner
9028-56-2		skin conditioner	1	skin conditioner
9031-94-1		skin conditioner	1	skin conditioner
9032-08-0		skin conditioner	1	skin conditioner
9041-07-0		skin conditioner|humectant	1	skin conditioner
9041-08-1		skin conditioner	1	skin conditioner
9055-15-6		skin conditioner	1	skin conditioner
9062-07-1		skin conditioner	1	skin conditioner
9067-32-7		skin conditioner|humectant	1	skin conditioner
9170-16-0		skin conditioner	1	skin conditioner
10024-66-5		skin conditioner	1	skin conditioner
10025-70-4		skin conditioner|oral care	1	skin conditioner
10036-64-3		skin conditioner	1	skin conditioner
10124-55-7		skin conditioner	1	skin conditioner
10284-63-6		skin conditioner|humectant	1	skin conditioner
10476-85-4		soother|skin conditioner|oral care	1	skin conditioner
11013-97-1	Methyl hesperidin	skin conditioner	1	skin conditioner	COc1ccc(cc1OC)C1CC(=O)c2c(O)cc(OC3OC(COC4OC(C)C(O)C(O)C4O)C(O)C(O)C3O)cc2O1
11042-64-1		skin conditioner|antistatic agent	1	skin conditioner
11094-60-3		skin conditioner	1	skin conditioner
11103-57-4		skin conditioner	1	skin conditioner
12017-38-8		skin conditioner	1	skin conditioner
12174-49-1		skin conditioner	1	skin conditioner
12565-63-8		skin conditioner	1	skin conditioner
12709-64-7		skin conditioner	1	skin conditioner
12738-23-7		skin conditioner|antistatic agent	1	skin conditioner
12758-40-6		skin conditioner	1	skin conditioner
13100-82-8		skin conditioner	1	skin conditioner
13187-90-1		skin conditioner	1	skin conditioner
13241-33-3		skin conditioner	1	skin conditioner
13397-26-7		skin conditioner	1	skin conditioner
13552-87-9		skin conditioner|antistatic agent	1	skin conditioner
13832-70-7		soother|skin conditioner	1	skin conditioner
13912-80-6	Nicoboxil	skin conditioner	1	skin conditioner	CCCCOCCOC(=O)C1=CC=CN=C1
14269-55-7		skin conditioner|odor eliminator	1	skin conditioner
14906-97-9		skin conditioner|chelator	1	skin conditioner
14984-34-0		skin conditioner|humectant	1	skin conditioner
14992-62-2		skin conditioner	1	skin conditioner
15086-17-6		skin conditioner	1	skin conditioner
15454-75-8		skin conditioner|humectant	1	skin conditioner
15687-27-1	Ibuprofen	skin conditioner	1	skin conditioner	CC(C)CC1=CC=C(C=C1)C(C)C(O)=O
16351-10-3		skin conditioner	1	skin conditioner
16509-77-6	Stearic monoethanolamide	skin conditioner	1	skin conditioner	CCCCCCCCCCCCCCCCCC(=O)OCC(N)=O
16729-19-4		skin conditioner	1	skin conditioner
17001-28-4		skin conditioner	1	skin conditioner
17105-15-6		skin conditioner|humectant|hair conditioner	1	skin conditioner
17110-51-9		skin conditioner	1	skin conditioner
17596-96-2		skin conditioner	1	skin conditioner
17676-33-4		skin conditioner	1	skin conditioner
17902-57-7	Dimethyl oxobenzo dioxasilane	skin conditioner	1	skin conditioner	C[Si]1(C)OC(=O)C2=CC=CC=C2O1
17955-88-3	1,1,1,3,5,5,5-Heptamethyl-3-octyltrisiloxane	skin conditioner	1	skin conditioner	CCCCCCCC[Si](C)(O[Si](C)(C)C)O[Si](C)(C)C
18449-41-7		skin conditioner	1	skin conditioner
18684-24-7	18684-24-7	skin conditioner	1	skin conditioner
18917-93-6		skin conditioner|keratolytic|buffer	1	skin conditioner
18962-61-3		skin conditioner	1	skin conditioner
19304-14-9		skin conditioner	1	skin conditioner
19666-16-1	Tridecyl salicylate	skin conditioner|antistatic agent	1	skin conditioner	CCCCCCCCCCCCCOC(=O)C1=CC=CC=C1O
19666-17-2	Myristyl salicylate	skin conditioner	1	skin conditioner	CCCCCCCCCCCCCCOC(=O)C1=CC=CC=C1O
19771-63-2		skin conditioner	1	skin conditioner
19856-23-6	Sodium levulinate	skin conditioner	1	skin conditioner	CC(=O)CCC(O)=O
20229-56-5	Spiraeoside	skin conditioner	1	skin conditioner	OCC1OC(Oc2ccc(cc2O)C2Oc3cc(O)cc(O)c3C(=O)C2=O)C(O)C(O)C1O
20267-20-3	Glycol dipivalate	skin conditioner	1	skin conditioner	CC(C)(C)C(=O)OCCOC(=O)C(C)(C)C
20316-62-5		skin conditioner	1	skin conditioner
20475-12-1		skin conditioner|humectant	1	skin conditioner
20601-85-8	CHEMBL32362	skin conditioner	1	skin conditioner
21059-46-1		skin conditioner	1	skin conditioner
21539-57-1	Lauroyl methyl beta-alanine	skin conditioner	1	skin conditioner	CCCCCCCCCCCC(=O)N(C)CCC(O)=O
22160-26-5		skin conditioner|humectant	1	skin conditioner
22204-53-1	Naproxen	skin conditioner	1	skin conditioner	COc1ccc2cc(ccc2c1)C(C)C(O)=O
22422-34-0	(-)-2,3-Pinanediol	skin conditioner	1	skin conditioner	CC1(C)C2CC1C(C)(O)C(O)C2
22794-26-9		skin conditioner|humectant	1	skin conditioner
22888-70-6	Silybin	skin conditioner	1	skin conditioner	COc1cc(ccc1O)C1Oc2cc(ccc2OC1CO)C1Oc2cc(O)cc(O)c2C(=O)C1O
23089-26-1	Levomenol	soother|skin conditioner|masking agent	1	skin conditioner	CC(C)=CCCC(C)(O)C1CCC(C)=CC1
23167-96-6		skin conditioner	1	skin conditioner
23434-88-0	Tetrahydropiperine	skin conditioner	1	skin conditioner	O=C(CCCCC1=CC2=C(OCO2)C=C1)N1CCCCC1
23444-65-7		skin conditioner	1	skin conditioner
23732-95-8		skin conditioner|humectant	1	skin conditioner
23749-19-7		skin conditioner	1	skin conditioner
24276-84-4		skin conditioner	1	skin conditioner
25078-14-2		skin conditioner	1	skin conditioner
25103-87-1		skin conditioner|polyurethane	1	skin conditioner
25167-62-8		skin conditioner|antistatic agent	1	skin conditioner
25189-70-2		skin conditioner	1	skin conditioner
25513-46-6		skin conditioner	1	skin conditioner
25583-20-4		skin conditioner	1	skin conditioner
25618-55-7		solvent|skin conditioner|humectant|antimicrobial	1	skin conditioner
26139-53-7		skin conditioner	1	skin conditioner
26371-07-3	1-Piperidinepropanoic acid	skin conditioner	1	skin conditioner	OC(=O)CCN1CCCCC1
26446-35-5		skin conditioner	1	skin conditioner
26874-89-5		skin conditioner	1	skin conditioner
27200-12-0	Ampelopsin	skin conditioner	1	skin conditioner	OC1C(Oc2cc(O)cc(O)c2C1=O)c1cc(O)c(O)c(O)c1
27707-45-5		skin conditioner|humectant	1	skin conditioner
28319-77-9		skin conditioner	1	skin conditioner
28605-84-7		skin conditioner	1	skin conditioner
28829-38-1		skin conditioner|humectant|hair conditioner	1	skin conditioner
28874-51-3	Sodium pidolate	skin conditioner|humectant|hair conditioner|antistatic agent	1	skin conditioner	OC(=O)C1CCC(=O)N1
28957-04-2		skin conditioner	1	skin conditioner
29031-19-4		skin conditioner	1	skin conditioner
29039-00-7		skin conditioner	1	skin conditioner
30125-24-7	Cyclohexylidenediphenylmethane	skin conditioner	1	skin conditioner	C1CCC(CC1)=C(C1=CC=CC=C1)C1=CC=CC=C1
30861-27-9	Aloesin	skin conditioner	1	skin conditioner	CC(=O)CC1=CC(=O)c2c(C)cc(O)c(C3OC(CO)C(O)C(O)C3O)c2O1
31014-78-5		skin conditioner	1	skin conditioner
31377-05-6		skin conditioner|humectant	1	skin conditioner
31511-30-5	EINECS 250-670-5	skin conditioner	1	skin conditioner	CC1OC(OCC2OC(OC3=C(Oc4cc(OCCO)cc(OCCO)c4C3=O)c3ccc(OCCO)c(O)c3)C(O)C(O)C2O)C(O)C(O)C1O
31799-91-4		skin conditioner	1	skin conditioner
32449-92-6	D-Glucuronolactone	skin conditioner	1	skin conditioner	OC1OC2C(O)C(=O)OC2C1O
32832-01-2		skin conditioner	1	skin conditioner
32839-18-2		skin conditioner|antistatic agent	1	skin conditioner
33581-77-0	Trimethylsilyl ((trimethylsilyl)oxy)acetate	skin conditioner	1	skin conditioner	C[Si](C)(C)OCC(=O)O[Si](C)(C)C
34406-66-1		skin conditioner	1	skin conditioner
34424-98-1		skin conditioner	1	skin conditioner
34459-32-0		skin conditioner	1	skin conditioner
34592-47-7	L-Thioproline	skin conditioner	1	skin conditioner	OC(=O)C1CSCN1
34644-03-6		skin conditioner	1	skin conditioner
34992-53-5		skin conditioner|odor eliminator	1	skin conditioner
35564-86-4		skin conditioner	1	skin conditioner
35890-38-1		skin conditioner	1	skin conditioner
35907-34-7		skin conditioner	1	skin conditioner
36393-20-1		skin conditioner	1	skin conditioner
36655-86-4		skin conditioner	1	skin conditioner
36665-67-5	Tridecyl laurate	skin conditioner	1	skin conditioner	CCCCCCCCCCCCCOC(=O)CCCCCCCCCCC
37189-34-7		skin conditioner|keratolytic	1	skin conditioner
37213-47-1		skin conditioner	1	skin conditioner
37309-58-3		skin conditioner	1	skin conditioner
37317-75-2		skin conditioner	1	skin conditioner
37326-33-3		skin conditioner	1	skin conditioner
37673-20-4	Cetyl PCA	skin conditioner	1	skin conditioner	CCCCCCCCCCCCCCCCOC(=O)C1CCC(=O)N1
37673-27-1	Myristyl PCA	skin conditioner	1	skin conditioner	CCCCCCCCCCCCCCOC(=O)C1CCC(=O)N1
37673-38-4	Pyroglutamyl behenate	skin conditioner	1	skin conditioner	CCCCCCCCCCCCCCCCCCCCCCOC(=O)C1CCC(=O)N1
38079-57-1	N2,N2-Dimethyl-N6-(1-oxododecyl)-L-lysine	skin conditioner	1	skin conditioner	CCCCCCCCCCCC(=O)NCCCCC(N(C)C)C(O)=O
38079-66-2	L-Glutamic acid, N-(1-oxohexadecyl)-	skin conditioner	1	skin conditioner	CCCCCCCCCCCCCCCC(=O)NC(CCC(O)=O)C(O)=O
38421-40-8		skin conditioner	1	skin conditioner
38444-13-2	Benzoic acid, 4-methoxy-, 4-pentylphenyl ester	skin conditioner	1	skin conditioner	CCCCCC1=CC=C(OC(=O)C2=CC=C(OC)C=C2)C=C1
39145-52-3		skin conditioner|humectant|emollient	1	skin conditioner
39382-08-6		skin conditioner	1	skin conditioner
39386-78-2		skin conditioner	1	skin conditioner
39529-26-5		skin conditioner	1	skin conditioner
39537-23-0	Alanylglutamine	skin conditioner|humectant	1	skin conditioner	CC(N)C(=O)NC(CCC(N)=O)C(O)=O
39630-46-1	Glycyl tyrosine	skin conditioner	1	skin conditioner	NCC(=O)NC(Cc1ccc(O)cc1)C(O)=O
39668-74-1		skin conditioner	1	skin conditioner
40516-49-2		skin conditioner|humectant|emollient|antioxidant	1	skin conditioner
40732-48-7		skin conditioner	1	skin conditioner
41736-92-9	Hydroxyproline palmitamide	skin conditioner	1	skin conditioner	CCCCCCCCCCCCCCCC(=O)N1CC(O)CC1C(O)=O
43101-48-0		skin conditioner|antistatic agent	1	skin conditioner
45768-31-8		skin conditioner	1	skin conditioner
49744-73-2	Hydroxy methylphenylpyridinone	skin conditioner	1	skin conditioner	CC1N(C=CC(=O)C1=O)c1ccccc1
50649-56-4	Pentylphenyl octyloxybenzoate	skin conditioner	1	skin conditioner	CCCCCCCCOC1=CC=C(C=C1)C(=O)OC1=CC=C(CCCCC)C=C1
53448-53-6		skin conditioner|humectant	1	skin conditioner
53973-98-1		skin conditioner	1	skin conditioner
54182-58-0		skin conditioner	1	skin conditioner
54398-03-7		skin conditioner	1	skin conditioner
54422-45-6		skin conditioner	1	skin conditioner
55056-80-9		skin conditioner	1	skin conditioner
55306-04-2		skin conditioner	1	skin conditioner
55349-01-4	N,N'-Hexane-1,6-diylbis(12-hydroxyoctadecanamide)	skin conditioner|humectant|hair conditioner	1	skin conditioner	CCCCCCC(O)CCCCCCCCCCC(=O)NCCCCCCNC(=O)CCCCCCCCCCC(O)CCCCCC
55399-93-4	Hydroxyisoleucine	skin conditioner|humectant	1	skin conditioner	CC(O)C(C)C(N)C(O)=O
55940-73-3		viscosity controlling agent|tonic|surfactant|skin conditioner|emollient	1	skin conditioner
56038-13-2	Sucralose	skin conditioner	1	skin conditioner	OCC1OC(OC2(CCl)OC(CCl)C(O)C2O)C(O)C(O)C1Cl
56265-06-6		skin conditioner|humectant	1	skin conditioner
56614-57-4	Camphanediol	skin conditioner	1	skin conditioner	[H]C12CCC(C)(C(O)C1O)C2(C)C
57105-50-7	Indoleacetyl phenylalanine	skin conditioner	1	skin conditioner	OC(=O)C(Cc1ccccc1)NC(=O)Cc1c[nH]c2ccccc12
57539-47-6		skin conditioner	1	skin conditioner
58214-38-3		skin conditioner|humectant	1	skin conditioner
58479-68-8		skin conditioner	1	skin conditioner
58725-33-0		skin conditioner	1	skin conditioner
59113-36-9		solvent|skin conditioner|humectant	1	skin conditioner
59219-65-7		skin conditioner	1	skin conditioner
59227-89-3	Laurocapram	skin conditioner	1	skin conditioner	CCCCCCCCCCCCN1CCCCCC1=O
59279-63-9		skin conditioner|humectant|hair conditioner|antistatic agent	1	skin conditioner
59792-81-3		skin conditioner|astringent	1	skin conditioner
60046-25-5		skin conditioner	1	skin conditioner
60111-46-8	1,1,1,5,5,5-hexamethyl-3-propyl-3-[(trimethylsilyl)oxy]trisiloxane	solvent|skin conditioner|humectant	1	skin conditioner
60816-70-8	Lithium gluconate	skin conditioner	1	skin conditioner	OCC(O)C(O)C(O)C(O)C(O)=O
61419-46-3		skin conditioner	1	skin conditioner
61512-76-3		skin conditioner	1	skin conditioner
61630-32-8	4-Acetoxy-4-androstene-3,17-dione	skin conditioner	1	skin conditioner	CC(=O)OC1=C2CCC3C4CCC(=O)C4(C)CCC3C2(C)CCC1=O
61710-63-2		skin conditioner	1	skin conditioner
61788-55-4		soother|skin conditioner	1	skin conditioner
62499-27-8		skin conditioner	1	skin conditioner
63231-63-0		skin conditioner	1	skin conditioner
63541-50-4		skin conditioner	1	skin conditioner
64519-44-4		skin conditioner|humectant	1	skin conditioner
64855-91-0	Arginine pyroglutamate	skin conditioner|humectant	1	skin conditioner	NC(CCCNC(N)=N)C(O)=O
65072-01-7		skin conditioner|humectant|hair conditioner	1	skin conditioner
68039-19-0		skin conditioner	1	skin conditioner
68070-90-6		skin conditioner	1	skin conditioner
68107-75-5		skin conditioner|humectant	1	skin conditioner
68127-22-0		skin conditioner|humectant	1	skin conditioner
68410-45-7		skin conditioner	1	skin conditioner
68440-02-8		skin conditioner	1	skin conditioner
68476-78-8		skin conditioner	1	skin conditioner
68489-14-5		skin conditioner	1	skin conditioner
68554-65-4		skin conditioner|humectant	1	skin conditioner
68584-81-6		skin conditioner	1	skin conditioner
68607-88-5		skin conditioner|humectant|hair conditioner|antistatic agent	1	skin conditioner
68649-11-6		skin conditioner	1	skin conditioner
68683-31-8		viscosity controlling agent|tonic|surfactant|skin conditioner|emollient	1	skin conditioner
68797-35-3		skin conditioner|humectant	1	skin conditioner
68854-18-2	Diethyl trioxopimelate	skin conditioner	1	skin conditioner	CCOC(=O)C(=O)CC(=O)CC(=O)C(=O)OCC
68876-77-7		skin conditioner	1	skin conditioner
68911-60-4		skin conditioner	1	skin conditioner
68917-11-3		skin conditioner|astringent	1	skin conditioner
68990-14-7		skin conditioner	1	skin conditioner
68990-66-9		skin conditioner|refresher	1	skin conditioner
68990-74-9		soother|skin conditioner	1	skin conditioner
69247-84-3		skin conditioner	1	skin conditioner
69617-84-1		skin conditioner	1	skin conditioner
69777-59-9		skin conditioner	1	skin conditioner
69777-61-3		skin conditioner	1	skin conditioner
69777-63-5		skin conditioner	1	skin conditioner
69777-64-6		skin conditioner	1	skin conditioner
69777-71-5		skin conditioner	1	skin conditioner
69991-67-9		skin conditioner	1	skin conditioner
70424-62-3		skin conditioner	1	skin conditioner
70442-25-0		skin conditioner|humectant	1	skin conditioner
70445-33-9		skin conditioner	1	skin conditioner
71011-23-9		tonic|soother|skin conditioner|emollient|astringent	1	skin conditioner
71011-28-4		skin conditioner|astringent|antioxidant	1	skin conditioner
71277-79-7	Disodium glycyrrhizinate	skin conditioner	1	skin conditioner
71463-44-0		skin conditioner	1	skin conditioner
72968-42-4		tonic|skin conditioner	1	skin conditioner
72986-41-5		skin conditioner	1	skin conditioner
73667-50-2		skin conditioner	1	skin conditioner
74135-10-7	Sucrose octasulfate, sodium salt	skin conditioner	1	skin conditioner	OS(=O)OCC1OC(COS(O)=O)(OC2OC(COS(O)=O)C(OS(O)=O)C(OS(O)=O)C2OS(O)=O)C(OS(O)=O)C1OS(O)=O
74333-44-1		skin conditioner	1	skin conditioner
74347-32-3		skin conditioner	1	skin conditioner
74659-70-4		skin conditioner	1	skin conditioner
75802-64-1	Ferrous aspartate	skin conditioner	1	skin conditioner	NC(CC(O)=O)C(O)=O
78271-08-6		skin conditioner|antistatic agent	1	skin conditioner
79458-68-7		skin conditioner	1	skin conditioner
79665-93-3		skin conditioner	1	skin conditioner
79777-30-3		skin conditioner	1	skin conditioner
82933-91-3		skin conditioner|humectant|emollient	1	skin conditioner
83846-95-1		skin conditioner	1	skin conditioner
84012-14-6		skin conditioner	1	skin conditioner
84012-16-8		skin conditioner	1	skin conditioner
84012-17-9		skin conditioner	1	skin conditioner
84012-18-0		skin conditioner|astringent	1	skin conditioner
84012-19-1		skin conditioner|oral care	1	skin conditioner
84012-21-5		tonic|skin conditioner|masking agent|abrasive	1	skin conditioner
84012-23-7		skin conditioner|astringent	1	skin conditioner
84012-29-3		skin conditioner	1	skin conditioner
84012-30-6		tonic|skin conditioner|humectant	1	skin conditioner
84012-36-2		skin conditioner	1	skin conditioner
84012-41-9		skin conditioner	1	skin conditioner
84082-46-2		skin conditioner	1	skin conditioner
84082-56-4		skin conditioner	1	skin conditioner
84082-63-3		skin conditioner	1	skin conditioner
84082-82-6		tonic|soother|skin conditioner|hair conditioner|astringent	1	skin conditioner
84236-44-2		skin conditioner	1	skin conditioner
84540-00-1		skin conditioner	1	skin conditioner
84540-14-7		skin conditioner	1	skin conditioner
84540-15-8		skin conditioner|humectant	1	skin conditioner
84540-19-2		skin conditioner	1	skin conditioner
84603-51-0		skin conditioner	1	skin conditioner
84603-54-3		skin conditioner	1	skin conditioner
84603-57-6		tonic|skin conditioner	1	skin conditioner
84603-61-0		skin conditioner	1	skin conditioner
84604-02-4		skin conditioner	1	skin conditioner
84604-03-5		skin conditioner	1	skin conditioner
84604-07-9		skin conditioner|moisturizer|masking agent|fragrance	1	skin conditioner
84604-10-4		tonic|skin conditioner|denaturant	1	skin conditioner
84604-16-0		skin conditioner	1	skin conditioner
84604-20-6		skin conditioner	1	skin conditioner
84604-22-8		skin conditioner	1	skin conditioner
84604-23-9		skin conditioner	1	skin conditioner
84625-26-3		skin conditioner	1	skin conditioner
84625-28-5		skin conditioner	1	skin conditioner
84625-34-3		skin conditioner	1	skin conditioner
84625-37-6		skin conditioner	1	skin conditioner
84625-39-8		tonic|soother|skin conditioner|perfumer|fragrance|emollient	1	skin conditioner
84625-41-2		skin conditioner	1	skin conditioner
84625-42-3		skin conditioner	1	skin conditioner
84625-49-0		tonic|skin conditioner|refresher|antimicrobial	1	skin conditioner
84649-72-9		skin conditioner|hair waving straightener|astringent|antidandruff	1	skin conditioner
84649-82-1		skin conditioner	1	skin conditioner
84649-87-6		skin conditioner	1	skin conditioner
84649-88-7		skin conditioner	1	skin conditioner
84649-90-1		skin conditioner	1	skin conditioner
84649-95-6		skin conditioner	1	skin conditioner
84650-05-5		skin conditioner	1	skin conditioner
84650-07-7		skin conditioner	1	skin conditioner
84650-11-3		tonic|astringent	1	skin conditioner
84650-15-7		skin conditioner	1	skin conditioner
84650-16-8		tonic|soother|skin conditioner	1	skin conditioner
84650-22-6		tonic|skin conditioner|astringent	1	skin conditioner
84650-41-9		tonic|skin conditioner|hair conditioner|astringent	1	skin conditioner
84650-58-8		skin conditioner	1	skin conditioner
84695-94-3		skin conditioner|astringent|antioxidant	1	skin conditioner
84695-96-5		skin conditioner	1	skin conditioner
84695-99-8		soother|skin conditioner	1	skin conditioner
84696-01-5		skin conditioner	1	skin conditioner
84696-04-8		skin conditioner	1	skin conditioner
84696-05-9		soother|skin conditioner|antidandruff|abrasive	1	skin conditioner
84696-08-2		skin conditioner	1	skin conditioner
84696-10-6		tonic|skin conditioner	1	skin conditioner
84696-17-3		tonic|skin conditioner	1	skin conditioner
84696-19-5		soother|skin conditioner|hair conditioner|astringent	1	skin conditioner
84696-20-8		soother|skin conditioner	1	skin conditioner
84696-25-3		skin conditioner	1	skin conditioner
84696-40-2		skin conditioner	1	skin conditioner
84696-50-4		skin conditioner	1	skin conditioner
84696-52-6		skin conditioner	1	skin conditioner
84775-40-6		skin conditioner|astringent|antioxidant	1	skin conditioner
84775-46-2		skin conditioner	1	skin conditioner
84775-54-2		tonic|skin conditioner	1	skin conditioner
84775-57-5		tonic|skin conditioner|astringent	1	skin conditioner
84775-60-0		skin conditioner	1	skin conditioner
84775-78-0		skin conditioner	1	skin conditioner
84775-81-5		skin conditioner|oral care|odor eliminator|masking agent	1	skin conditioner
84775-89-3		soother|antiseborrheic	1	skin conditioner
84775-94-0		skin conditioner|humectant|astringent	1	skin conditioner
84775-95-1		skin conditioner	1	skin conditioner
84775-99-5		skin conditioner	1	skin conditioner
84776-02-3		skin conditioner	1	skin conditioner
84776-10-3		skin conditioner|bleach	1	skin conditioner
84776-11-4		skin conditioner	1	skin conditioner
84776-30-7		skin conditioner	1	skin conditioner
84776-66-9		soother|skin conditioner|refresher|masking agent	1	skin conditioner
84776-67-0		skin conditioner	1	skin conditioner
84776-68-1		skin conditioner	1	skin conditioner
84787-64-4		skin conditioner	1	skin conditioner
84787-66-6		skin conditioner	1	skin conditioner
84787-68-8		skin conditioner	1	skin conditioner
84837-00-3		skin conditioner	1	skin conditioner
84837-05-8		skin conditioner	1	skin conditioner
84848-75-9		skin conditioner	1	skin conditioner
84929-21-5		skin conditioner	1	skin conditioner
84929-23-7		skin conditioner	1	skin conditioner
84929-28-2		tonic|skin conditioner|astringent	1	skin conditioner
84929-33-9		skin conditioner	1	skin conditioner
84929-39-5		skin conditioner	1	skin conditioner
84929-40-8		tonic|skin conditioner|abrasive	1	skin conditioner
84929-43-1		skin conditioner	1	skin conditioner
84929-44-2		skin conditioner	1	skin conditioner
84929-48-6		tonic|skin conditioner|refresher|cleaner	1	skin conditioner
84929-55-5		soother|skin conditioner|nail conditioner	1	skin conditioner
84929-56-6		skin conditioner	1	skin conditioner
84929-60-2		skin conditioner	1	skin conditioner
84929-63-5		skin conditioner	1	skin conditioner
84929-68-0		skin conditioner|astringent	1	skin conditioner
84929-74-8		skin conditioner	1	skin conditioner
84961-47-7		skin conditioner	1	skin conditioner
84961-54-6		skin conditioner|astringent	1	skin conditioner
84961-55-7		skin conditioner|abrasive	1	skin conditioner
84961-59-1		skin conditioner	1	skin conditioner
85085-22-9		skin conditioner|nail conditioner|hair conditioner|astringent|antioxidant	1	skin conditioner
85085-25-2		skin conditioner|masking agent|hair conditioner|astringent|antioxidant	1	skin conditioner
85085-33-2		tonic|soother|skin conditioner|emollient	1	skin conditioner
85085-39-8		skin conditioner	1	skin conditioner
85085-46-7		skin conditioner|hair conditioner|astringent	1	skin conditioner
85085-54-7		skin conditioner	1	skin conditioner
85085-62-7		skin conditioner|humectant	1	skin conditioner
85085-65-0		skin conditioner	1	skin conditioner
85085-71-8		skin conditioner	1	skin conditioner
85117-06-2		skin conditioner	1	skin conditioner
85117-07-3		skin conditioner	1	skin conditioner
85117-13-1		skin conditioner	1	skin conditioner
85117-14-2		skin conditioner	1	skin conditioner
85117-19-7		skin conditioner|astringent	1	skin conditioner
85117-22-2		skin conditioner|humectant	1	skin conditioner
85186-53-4		skin conditioner|abrasive	1	skin conditioner
85187-05-9		skin conditioner	1	skin conditioner
85187-10-6		skin conditioner	1	skin conditioner
85251-58-7		skin conditioner	1	skin conditioner
85251-65-6		tonic|skin conditioner	1	skin conditioner
85251-67-8		skin conditioner	1	skin conditioner
85252-25-1	Isodecyl salicylate	skin conditioner|antistatic agent	1	skin conditioner	CC(C)CCCCCCCOC(=O)C1=CC=CC=C1O
85480-32-6		skin conditioner	1	skin conditioner
85480-50-8		skin conditioner	1	skin conditioner
85665-41-4		smoother|skin conditioner|moisturizer|antiseborrheic	1	skin conditioner
85737-04-8		skin conditioner	1	skin conditioner
85940-30-3		skin conditioner|humectant	1	skin conditioner
85940-33-6		skin conditioner	1	skin conditioner
85940-37-0		skin conditioner	1	skin conditioner
86088-83-7		skin conditioner	1	skin conditioner
86404-04-8	3-O-Ethylascorbic acid	skin conditioner	1	skin conditioner	CCOC1C(OC(=O)C1=O)C(O)CO
87390-32-7		skin conditioner	1	skin conditioner
88306-70-1	3-O-Cetyl ascorbic acid	skin conditioner	1	skin conditioner	CCCCCCCCCCCCCCCCOC1C(OC(=O)C1=O)C(O)CO
89957-52-8		skin conditioner	1	skin conditioner
89957-75-5		skin conditioner	1	skin conditioner
89957-82-4		skin conditioner|astringent	1	skin conditioner
89957-93-7		tonic|skin conditioner	1	skin conditioner
89958-03-2		skin conditioner|humectant|emollient	1	skin conditioner
89958-05-4		skin conditioner	1	skin conditioner
89958-06-5		skin conditioner	1	skin conditioner
89958-12-3		skin conditioner|astringent	1	skin conditioner
89958-13-4		skin conditioner	1	skin conditioner
89958-14-5		skin conditioner	1	skin conditioner
89958-23-6		skin conditioner	1	skin conditioner
89958-33-8		skin conditioner	1	skin conditioner
89958-35-0		skin conditioner	1	skin conditioner
89997-56-8		skin conditioner	1	skin conditioner
89997-67-1		skin conditioner	1	skin conditioner
89997-70-6		tonic|skin conditioner	1	skin conditioner
89997-82-0		skin conditioner	1	skin conditioner
89997-84-2		skin conditioner|astringent	1	skin conditioner
89997-95-5		skin conditioner	1	skin conditioner
89997-98-8		tonic|skin conditioner	1	skin conditioner
89998-02-7		skin conditioner	1	skin conditioner
89998-10-7		skin conditioner	1	skin conditioner
89998-27-6		skin conditioner|hair conditioner|astringent	1	skin conditioner
90027-98-8		skin conditioner	1	skin conditioner
90028-20-9		tonic|skin conditioner|oral care|moisturizer|masking agent	1	skin conditioner
90028-23-2		skin conditioner	1	skin conditioner
90028-28-7		skin conditioner|humectant|hair conditioner	1	skin conditioner
90028-29-8		tonic|skin conditioner|emollient	1	skin conditioner
90028-30-1		skin conditioner	1	skin conditioner
90028-31-2		skin conditioner	1	skin conditioner
90028-32-3		tonic|soother|skin conditioner|emollient|cleaner	1	skin conditioner
90028-38-9		tonic|skin conditioner	1	skin conditioner
90028-41-4		skin conditioner	1	skin conditioner
90028-42-5		skin conditioner	1	skin conditioner
90028-46-9		skin conditioner	1	skin conditioner
90028-55-0		tonic|skin conditioner|emollient	1	skin conditioner
90028-59-4		skin conditioner	1	skin conditioner
90028-83-4		skin conditioner	1	skin conditioner
90045-23-1		skin conditioner|astringent	1	skin conditioner
90045-29-7		skin conditioner	1	skin conditioner
90045-47-9		skin conditioner|humectant|astringent	1	skin conditioner
90045-51-5		skin conditioner	1	skin conditioner
90045-52-6		skin conditioner	1	skin conditioner
90045-62-8		skin conditioner	1	skin conditioner
90045-67-3		skin conditioner	1	skin conditioner
90045-71-9		skin conditioner	1	skin conditioner
90045-74-2		skin conditioner	1	skin conditioner
90045-76-4		skin conditioner|humectant	1	skin conditioner
90045-81-1		skin conditioner	1	skin conditioner
90045-83-3		skin conditioner	1	skin conditioner
90045-97-9		skin conditioner	1	skin conditioner
90045-99-1		skin conditioner	1	skin conditioner
90046-00-7		skin conditioner	1	skin conditioner
90046-08-5		soother|skin conditioner	1	skin conditioner
90046-10-9		soother|skin conditioner|refresher|masking agent	1	skin conditioner
90046-18-7		skin conditioner	1	skin conditioner
90063-41-5		skin conditioner	1	skin conditioner
90063-43-7		skin conditioner	1	skin conditioner
90063-50-6		tonic|skin conditioner	1	skin conditioner
90063-51-7		skin conditioner|humectant	1	skin conditioner
90063-55-1		skin conditioner	1	skin conditioner
90063-56-2		soother|masking agent	1	skin conditioner
90063-68-6		skin conditioner	1	skin conditioner
90063-76-6		skin conditioner|astringent	1	skin conditioner
90063-81-3		skin conditioner	1	skin conditioner
90063-85-7		tonic|skin conditioner	1	skin conditioner
90063-88-0		skin conditioner	1	skin conditioner
90063-90-4		skin conditioner	1	skin conditioner
90063-94-8		soother|skin conditioner|humectant|astringent	1	skin conditioner
90063-96-0		tonic|skin conditioner|masking agent|astringent	1	skin conditioner
90064-10-1		skin conditioner|astringent	1	skin conditioner
90064-13-4		smoother|skin conditioner	1	skin conditioner
90064-15-6		skin conditioner	1	skin conditioner
90064-31-6		skin conditioner|moisturizer|abrasive	1	skin conditioner
90082-45-4		skin conditioner	1	skin conditioner
90082-63-6		skin conditioner	1	skin conditioner
90082-65-8		skin conditioner	1	skin conditioner
90082-67-0		skin conditioner	1	skin conditioner
90082-76-1		skin conditioner	1	skin conditioner
90082-78-3		skin conditioner	1	skin conditioner
90082-95-4		skin conditioner|refresher	1	skin conditioner
90082-98-7		skin conditioner	1	skin conditioner
90082-99-8		skin conditioner|oxidizer	1	skin conditioner
90083-00-4		skin conditioner	1	skin conditioner
90083-05-9		skin conditioner|antiseborrheic	1	skin conditioner
90083-09-3		skin conditioner|astringent	1	skin conditioner
90105-91-2		skin conditioner	1	skin conditioner
90105-94-5		tonic|skin conditioner|masking agent|astringent|antioxidant	1	skin conditioner
90105-95-6		skin conditioner	1	skin conditioner
90105-98-9		skin conditioner	1	skin conditioner
90106-13-1		skin conditioner|astringent	1	skin conditioner
90106-16-4		soother|skin conditioner	1	skin conditioner
90106-27-7		tonic|skin conditioner|astringent	1	skin conditioner
90106-29-9		skin conditioner	1	skin conditioner
90106-31-3		tonic|skin conditioner|emollient|astringent	1	skin conditioner
90106-33-5		skin conditioner|astringent|antiseborrheic	1	skin conditioner
90106-41-5		soother|skin conditioner	1	skin conditioner
90106-48-2		skin conditioner|bulking agent|abrasive	1	skin conditioner
90106-50-6		skin conditioner	1	skin conditioner
90106-53-9		soother|skin conditioner	1	skin conditioner
90106-55-1		skin conditioner	1	skin conditioner
90106-65-3		soother|skin conditioner	1	skin conditioner
90106-66-4		soother|skin conditioner	1	skin conditioner
90106-67-5		skin conditioner	1	skin conditioner
90106-69-7		skin conditioner	1	skin conditioner
90106-87-9		tonic|skin conditioner	1	skin conditioner
90131-20-7		skin conditioner|astringent	1	skin conditioner
90131-22-9		skin conditioner	1	skin conditioner
90131-25-2		skin conditioner	1	skin conditioner
90131-28-5		skin conditioner	1	skin conditioner
90131-34-3		skin conditioner	1	skin conditioner
90131-44-5		skin conditioner|humectant	1	skin conditioner
90131-47-8		skin conditioner	1	skin conditioner
90131-48-9		skin conditioner|astringent	1	skin conditioner
90131-49-0		skin conditioner|astringent	1	skin conditioner
90131-55-8		skin conditioner	1	skin conditioner
90131-57-0		skin conditioner	1	skin conditioner
90131-61-6		skin conditioner	1	skin conditioner
90131-76-3		skin conditioner	1	skin conditioner
90131-83-2		skin conditioner	1	skin conditioner
90131-86-5		skin conditioner	1	skin conditioner
90131-89-8		skin conditioner	1	skin conditioner
90131-94-5		skin conditioner	1	skin conditioner
90131-97-8		skin conditioner	1	skin conditioner
90131-98-9		skin conditioner|astringent	1	skin conditioner
90132-01-7		skin conditioner	1	skin conditioner
90132-03-9		skin conditioner	1	skin conditioner
90147-46-9		skin conditioner	1	skin conditioner
90147-47-0		skin conditioner|hair conditioner|emollient|astringent|antioxidant	1	skin conditioner
90147-49-2		skin conditioner	1	skin conditioner
90244-84-1		skin conditioner|astringent	1	skin conditioner
90244-99-8		skin conditioner|humectant|flavorant|emollient|abrasive	1	skin conditioner
90320-09-5		skin conditioner	1	skin conditioner
90320-19-7		skin conditioner	1	skin conditioner
90320-32-4		skin conditioner	1	skin conditioner
90320-42-6		skin conditioner	1	skin conditioner
90506-73-3		skin conditioner	1	skin conditioner
90989-73-4		skin conditioner	1	skin conditioner
90990-01-5		skin conditioner|moisturizer	1	skin conditioner
91031-88-8		skin conditioner|emulsifier|antistatic agent	1	skin conditioner
91079-57-1		skin conditioner	1	skin conditioner
91079-94-6		skin conditioner	1	skin conditioner
91080-06-7		skin conditioner	1	skin conditioner
91080-11-4		skin conditioner|humectant	1	skin conditioner
91080-13-6		skin conditioner	1	skin conditioner
91081-56-0		skin conditioner	1	skin conditioner
91081-61-7		skin conditioner|moisturizer	1	skin conditioner
91081-63-9		skin conditioner|refatting agent	1	skin conditioner
91721-68-5		skin conditioner	1	skin conditioner
91721-98-1		soother|skin conditioner|masking agent	1	skin conditioner
91722-13-3		skin conditioner	1	skin conditioner
91722-22-4		skin conditioner|moisturizer	1	skin conditioner
91722-52-0		skin conditioner	1	skin conditioner
91722-57-5		skin conditioner	1	skin conditioner
91722-58-6		skin conditioner	1	skin conditioner
91722-59-7		skin conditioner	1	skin conditioner
91722-60-0		skin conditioner	1	skin conditioner
91722-66-6		skin conditioner|humectant	1	skin conditioner
91722-81-5		skin conditioner|abrasive	1	skin conditioner
91722-87-1		skin conditioner	1	skin conditioner
91722-89-3		tonic|skin conditioner	1	skin conditioner
91723-03-4		skin conditioner|astringent|antimicrobial	1	skin conditioner
91723-04-5		skin conditioner|astringent	1	skin conditioner
91723-07-8		skin conditioner	1	skin conditioner
91723-39-6		skin conditioner	1	skin conditioner
91745-62-9		skin conditioner	1	skin conditioner
91745-92-5		skin conditioner	1	skin conditioner
91770-11-5		skin conditioner	1	skin conditioner
91770-16-0		soother|skin conditioner	1	skin conditioner
91770-22-8		skin conditioner|keratolytic	1	skin conditioner
91770-26-2		skin conditioner	1	skin conditioner
91770-44-4		soother	1	skin conditioner
91770-61-5		tonic|skin conditioner|astringent	1	skin conditioner
91770-72-8		tonic|astringent	1	skin conditioner
91770-86-4		skin conditioner	1	skin conditioner
91838-84-5		skin conditioner|absorber	1	skin conditioner
91845-35-1		skin conditioner	1	skin conditioner
91845-42-0		skin conditioner	1	skin conditioner
91845-57-7		skin conditioner	1	skin conditioner
92129-90-3		skin conditioner	1	skin conditioner
92201-13-3		skin conditioner	1	skin conditioner
92201-41-7		skin conditioner	1	skin conditioner
92201-42-8		skin conditioner	1	skin conditioner
92201-58-6		skin conditioner	1	skin conditioner
92201-79-1		skin conditioner	1	skin conditioner
92202-08-9		skin conditioner	1	skin conditioner
92202-19-2		skin conditioner	1	skin conditioner
92202-21-6		skin conditioner	1	skin conditioner
92202-27-2		skin conditioner	1	skin conditioner
92346-91-3		skin conditioner	1	skin conditioner
92346-92-4		skin conditioner	1	skin conditioner
92347-09-6		skin conditioner	1	skin conditioner
92456-66-1		skin conditioner	1	skin conditioner
92456-82-1		skin conditioner	1	skin conditioner
92457-15-3		skin conditioner	1	skin conditioner
92457-25-5		skin conditioner	1	skin conditioner
92457-29-9		skin conditioner	1	skin conditioner
92457-37-9		skin conditioner|astringent|antioxidant	1	skin conditioner
92457-39-1		skin conditioner	1	skin conditioner
92797-35-8		skin conditioner	1	skin conditioner
93062-85-2		skin conditioner	1	skin conditioner
93164-88-6		skin conditioner	1	skin conditioner
93164-89-7		skin conditioner	1	skin conditioner
93164-91-1		skin conditioner	1	skin conditioner
93164-98-8		skin conditioner	1	skin conditioner
93165-04-9		skin conditioner	1	skin conditioner
93165-11-8		tonic|skin conditioner	1	skin conditioner
93165-21-0		skin conditioner	1	skin conditioner
93165-22-1		skin conditioner	1	skin conditioner
93165-23-2		skin conditioner	1	skin conditioner
93165-57-2		tonic|skin conditioner|astringent|antiseborrheic|antioxidant	1	skin conditioner
93165-64-1		skin conditioner	1	skin conditioner
93165-68-5		skin conditioner	1	skin conditioner
93165-71-0		tonic|skin conditioner|astringent	1	skin conditioner
93165-81-2		skin conditioner	1	skin conditioner
93165-83-4		skin conditioner|humectant	1	skin conditioner
93165-84-5		skin conditioner|humectant	1	skin conditioner
93280-98-9		skin conditioner	1	skin conditioner
93333-80-3		skin conditioner|hair conditioner|astringent	1	skin conditioner
93333-86-9		skin conditioner	1	skin conditioner
93333-87-0		skin conditioner	1	skin conditioner
93333-92-7		skin conditioner	1	skin conditioner
93334-56-6		skin conditioner	1	skin conditioner
93348-14-2		skin conditioner|humectant|antioxidant	1	skin conditioner
93348-59-5		skin conditioner	1	skin conditioner
93384-22-6		skin conditioner|humectant|hair conditioner|binder	1	skin conditioner
93385-13-8		skin conditioner	1	skin conditioner
93455-94-8		tonic|skin conditioner	1	skin conditioner
93455-95-9		skin conditioner	1	skin conditioner
93685-77-9		skin conditioner	1	skin conditioner
93762-75-5		skin conditioner	1	skin conditioner
93803-87-3		skin conditioner	1	skin conditioner
93924-10-8		skin conditioner	1	skin conditioner
93924-11-9		skin conditioner	1	skin conditioner
94050-90-5	Hydroxyphenoxy propionic acid	skin conditioner	1	skin conditioner	CC(Oc1ccc(O)cc1)C(O)=O
94134-94-8		soother|skin conditioner|oral care	1	skin conditioner
94166-95-7		skin conditioner	1	skin conditioner
94167-03-0		skin conditioner	1	skin conditioner
94167-09-6		skin conditioner	1	skin conditioner
94167-11-0		skin conditioner|humectant	1	skin conditioner
94167-13-2		skin conditioner	1	skin conditioner
94279-78-4		skin conditioner|humectant|astringent	1	skin conditioner
94279-93-3		skin conditioner	1	skin conditioner
94279-95-5		skin conditioner	1	skin conditioner
94333-86-5		skin conditioner	1	skin conditioner
94333-93-4		tonic|skin conditioner|astringent	1	skin conditioner
94333-99-0		skin conditioner	1	skin conditioner
94349-73-2		skin conditioner|humectant	1	skin conditioner
94349-76-5		skin conditioner	1	skin conditioner
94349-91-4		skin conditioner	1	skin conditioner
94350-02-4		skin conditioner	1	skin conditioner
94350-09-1		skin conditioner	1	skin conditioner
94442-17-8		skin conditioner	1	skin conditioner
94465-67-5		skin conditioner	1	skin conditioner
94465-78-8		skin conditioner	1	skin conditioner
94465-79-9		skin conditioner|abrasive	1	skin conditioner
94525-01-6		skin conditioner|humectant|hair conditioner	1	skin conditioner
94561-64-6		skin conditioner	1	skin conditioner
94603-73-6		skin conditioner|humectant	1	skin conditioner
94891-16-4		skin conditioner|humectant|emollient	1	skin conditioner
94929-68-0		skin conditioner	1	skin conditioner
94944-92-0		skin conditioner	1	skin conditioner
94945-06-9		skin conditioner	1	skin conditioner
95193-52-5		skin conditioner	1	skin conditioner
95370-68-6		skin conditioner	1	skin conditioner
96507-89-0		skin conditioner	1	skin conditioner
96585-18-1		skin conditioner	1	skin conditioner
96690-40-3		skin conditioner	1	skin conditioner
96690-41-4		skin conditioner|humectant|hair conditioner|antistatic agent	1	skin conditioner
96690-50-5		skin conditioner	1	skin conditioner
96702-03-3		skin conditioner	1	skin conditioner
97281-15-7		tonic|skin conditioner|moisturizer	1	skin conditioner
97281-43-1		skin conditioner	1	skin conditioner
97338-12-0		skin conditioner|humectant	1	skin conditioner
97404-52-9		skin conditioner	1	skin conditioner
97435-02-4		skin conditioner	1	skin conditioner
97553-50-9		skin conditioner	1	skin conditioner
97593-07-2		skin conditioner	1	skin conditioner
97593-53-8		skin conditioner	1	skin conditioner
97615-94-6		skin conditioner|moisturizer	1	skin conditioner
97635-56-8		skin conditioner|humectant|antistatic agent	1	skin conditioner
97635-57-9	5-Oxo-L-proline, compound with DL-lysine (1:1)	skin conditioner|humectant|antistatic agent	1	skin conditioner	NCCCCC(N)C(O)=O
97659-61-5		skin conditioner	1	skin conditioner
97659-68-2		skin conditioner	1	skin conditioner
97675-52-0		skin conditioner	1	skin conditioner
97675-54-2		skin conditioner|humectant	1	skin conditioner
97675-77-9		skin conditioner	1	skin conditioner
97676-09-0		humectant|astringent	1	skin conditioner
97676-10-3		skin conditioner	1	skin conditioner
97765-59-8		skin conditioner	1	skin conditioner
97766-35-3		skin conditioner	1	skin conditioner
97766-44-4		humectant|astringent	1	skin conditioner
97766-45-5		skin conditioner	1	skin conditioner
97927-05-4		skin conditioner	1	skin conditioner
97952-61-9		skin conditioner	1	skin conditioner
97952-63-1		skin conditioner	1	skin conditioner
98143-57-8		skin conditioner	1	skin conditioner
98654-16-1		skin conditioner	1	skin conditioner
98999-13-4		skin conditioner	1	skin conditioner
99035-50-4		skin conditioner|humectant	1	skin conditioner
99126-54-2		skin conditioner	1	skin conditioner
100085-36-7		soother|smoother|skin conditioner	1	skin conditioner
100402-60-6	d-Glucose, ether with glycerol	skin conditioner|humectant	1	skin conditioner	OCC(O)C(O)C(O)C(OC(C=O)C(O)C(O)C(O)CO)C=O
102868-96-2		skin conditioner	1	skin conditioner
103175-09-3		skin conditioner	1	skin conditioner
104723-60-6		skin conditioner	1	skin conditioner
104771-87-1	Sodium phenylacetyl glutamine	skin conditioner	1	skin conditioner	NC(=O)CCC(CC(=O)Cc1ccccc1)C(O)=O
105524-32-1		skin conditioner|humectant	1	skin conditioner
105883-41-8		skin conditioner|humectant	1	skin conditioner
105883-42-9	Methylsilanol carboxymethyl theophylline	skin conditioner	1	skin conditioner	CN1C2=C(N(CC(=O)O[Si](C)(O)O)C=N2)C(=O)N(C)C1=O
105883-44-1		skin conditioner|antistatic agent	1	skin conditioner
105883-45-2		skin conditioner|antistatic agent	1	skin conditioner
105883-49-6		skin conditioner	1	skin conditioner
105883-50-9		skin conditioner	1	skin conditioner
105883-51-0	PUBCHEM_57346504	skin conditioner|moisturizer	1	skin conditioner
108775-04-8		skin conditioner|humectant	1	skin conditioner
109403-64-7		skin conditioner	1	skin conditioner
110204-68-7		skin conditioner|humectant	1	skin conditioner
110204-69-8		skin conditioner|humectant	1	skin conditioner
110204-70-1		skin conditioner|humectant	1	skin conditioner
110483-07-3		skin conditioner|humectant|emollient	1	skin conditioner
111744-92-4		skin conditioner|humectant	1	skin conditioner
111870-68-9		skin conditioner	1	skin conditioner
112894-37-8	2-O-Ethyl ascorbic acid	skin conditioner	1	skin conditioner	CCOC1C(=O)OC(C(O)CO)C1=O
116265-66-8		solvent|skin conditioner	1	skin conditioner
118292-40-3	Tazarotene	skin conditioner	1	skin conditioner	CCOC(=O)C1=CC=C(N=C1)C#CC1=CC=C2SCCC(C)(C)C2=C1
119068-78-9		skin conditioner	1	skin conditioner
119433-80-6	Thiazolylalanine	skin conditioner	1	skin conditioner	NC(Cc1cscn1)C(O)=O
120022-92-6		skin conditioner|humectant	1	skin conditioner
120128-90-7		skin conditioner	1	skin conditioner
120199-58-8		skin conditioner	1	skin conditioner
123465-35-0		skin conditioner	1	skin conditioner
126094-21-1	3-Methoxypropylgluconamide	skin conditioner|humectant	1	skin conditioner	COCCCNC(=O)C(O)C(O)C(O)C(O)CO
126595-07-1		skin conditioner	1	skin conditioner
127471-94-7		skin conditioner	1	skin conditioner
127512-93-0		skin conditioner	1	skin conditioner
128932-51-4		skin conditioner	1	skin conditioner
128952-18-1		skin conditioner|moisturizer|humectant	1	skin conditioner
128973-71-7		skin conditioner|antistatic agent	1	skin conditioner
129426-19-3	PUBCHEM_22496699	skin conditioner	1	skin conditioner
129893-27-2		skin conditioner|bulking agent|abrasive	1	skin conditioner
130120-57-9		skin conditioner	1	skin conditioner
132940-73-9		skin conditioner	1	skin conditioner
133738-23-5		skin conditioner	1	skin conditioner
135304-07-3		skin conditioner|reducer	1	skin conditioner
135620-20-1		skin conditioner	1	skin conditioner
137786-58-4		skin conditioner	1	skin conditioner
138506-45-3	Pidobenzone	skin conditioner	1	skin conditioner	Oc1ccc(OC(=O)C2CCC(=O)N2)cc1
139416-29-8		skin conditioner	1	skin conditioner
142880-36-2	Ilomastat	skin conditioner|chelator	1	skin conditioner	CNC(=O)C(Cc1c[nH]c2ccccc12)NC(=O)C(CC(C)C)CC(=O)NO
143378-76-1	PUBCHEM_22266949	skin conditioner	1	skin conditioner
143476-08-8		skin conditioner	1	skin conditioner
144470-58-6		skin conditioner	1	skin conditioner
148675-93-8	PUBCHEM_53436607	skin conditioner	1	skin conditioner
151841-65-5		skin conditioner	1	skin conditioner
152923-52-9		skin conditioner	1	skin conditioner
155808-79-0		skin conditioner	1	skin conditioner
156715-51-4		skin conditioner|humectant|hair conditioner	1	skin conditioner
159317-32-5		skin conditioner	1	skin conditioner
159534-89-1	Ethyl ximenynate	skin conditioner	1	skin conditioner	CCCCCC\C=C\C#CCCCCCCCC(=O)OCC
160965-04-8		skin conditioner	1	skin conditioner
164288-49-7		skin conditioner	1	skin conditioner
164288-50-0		skin conditioner	1	skin conditioner
164288-52-2		tonic|skin conditioner|abrasive	1	skin conditioner
164288-54-4		skin conditioner	1	skin conditioner
168961-92-0		skin conditioner	1	skin conditioner
168961-93-1		skin conditioner	1	skin conditioner
173521-40-9		skin conditioner	1	skin conditioner
173840-43-2		skin conditioner	1	skin conditioner
175357-18-3		skin conditioner	1	skin conditioner
175413-23-7	Methyl aloesinyl cinnamate	skin conditioner	1	skin conditioner	COc1cc(C)c2C(=O)C=C(CC(C)O)Oc2c1C1OC(CO)C(O)C(O)C1OC(=O)\C=C\c1ccccc1
176370-26-6		skin conditioner|humectant	1	skin conditioner
178900-23-7		skin conditioner	1	skin conditioner
179308-53-3	Prolyl histamine hydrochloride	skin conditioner	1	skin conditioner	O=C(NCCc1cnc[nH]1)C1CCCN1
182162-80-7		skin conditioner	1	skin conditioner
182371-63-7		skin conditioner	1	skin conditioner
185143-68-4		skin conditioner	1	skin conditioner
187593-69-7		skin conditioner	1	skin conditioner
188012-54-6		skin conditioner	1	skin conditioner
190454-04-7		skin conditioner	1	skin conditioner
192230-28-7		skin conditioner	1	skin conditioner
195060-85-6		skin conditioner	1	skin conditioner
200512-90-9		skin conditioner	1	skin conditioner
206360-00-1		skin conditioner	1	skin conditioner
207620-98-2		skin conditioner	1	skin conditioner
207972-39-2	PUBCHEM_57375652	skin conditioner	1	skin conditioner
209802-43-7		skin conditioner	1	skin conditioner
210545-23-6		skin conditioner|humectant|emollient	1	skin conditioner
210896-25-6		skin conditioner	1	skin conditioner
214495-31-5		skin conditioner	1	skin conditioner
218916-52-0	Diacetyl benzoyl lathyrol	skin conditioner|bleach	1	skin conditioner	CC1CC2(OC(C)=O)C(C1OC(=O)c1ccccc1)C(OC(C)=O)C(=C)CCC1C(\C=C(C)/C2=O)C1(C)C
220435-39-2	Sodium ursolate	skin conditioner	1	skin conditioner	CC1CCC2(CCC3(C)C(=CCC4C5(C)CCC(O)C(C)(C)C5CCC34C)C2C1C)C(O)=O
220610-55-9		skin conditioner	1	skin conditioner
221363-35-5		skin conditioner	1	skin conditioner
222400-22-8		skin conditioner	1	skin conditioner
222400-59-1		skin conditioner	1	skin conditioner
222400-67-1		skin conditioner	1	skin conditioner
223239-92-7		skin conditioner	1	skin conditioner
223239-93-8		skin conditioner	1	skin conditioner
223239-94-9		skin conditioner	1	skin conditioner
223239-95-0		skin conditioner	1	skin conditioner
223705-62-2		skin conditioner	1	skin conditioner
223706-58-9		skin conditioner	1	skin conditioner
223706-99-8		skin conditioner	1	skin conditioner
223707-19-5		skin conditioner	1	skin conditioner
223747-63-5		skin conditioner	1	skin conditioner
223747-71-5		skin conditioner	1	skin conditioner
223747-76-0		soother|skin conditioner|moisturizer|humectant	1	skin conditioner
223747-79-3		skin conditioner	1	skin conditioner
223747-80-6		skin conditioner	1	skin conditioner
223747-82-8		skin conditioner	1	skin conditioner
223747-89-5		skin conditioner	1	skin conditioner
223747-97-5		skin conditioner	1	skin conditioner
223748-04-7		skin conditioner	1	skin conditioner
223748-06-9		skin conditioner	1	skin conditioner
223748-07-1		skin conditioner	1	skin conditioner
223748-08-1		skin conditioner|humectant|antioxidant	1	skin conditioner
223748-09-2		skin conditioner	1	skin conditioner
223748-10-5		skin conditioner	1	skin conditioner
223748-11-6		skin conditioner	1	skin conditioner
223748-14-9		skin conditioner|denaturant|abrasive	1	skin conditioner
223748-24-1		skin conditioner	1	skin conditioner
223748-34-3		skin conditioner	1	skin conditioner
223748-41-2		skin conditioner	1	skin conditioner
223748-44-5		tonic|skin conditioner|masking agent|astringent|abrasive	1	skin conditioner
223748-52-5		skin conditioner	1	skin conditioner
223748-74-1		skin conditioner	1	skin conditioner
223748-79-6		skin conditioner	1	skin conditioner
223748-82-1		skin conditioner	1	skin conditioner
223748-85-4		skin conditioner	1	skin conditioner
223748-87-6		skin conditioner	1	skin conditioner
223748-89-8		skin conditioner	1	skin conditioner
223748-91-2		skin conditioner	1	skin conditioner
223749-01-7		skin conditioner	1	skin conditioner
223749-06-2		skin conditioner	1	skin conditioner
223749-07-3		skin conditioner	1	skin conditioner
223749-17-5		skin conditioner	1	skin conditioner
223749-20-0		skin conditioner	1	skin conditioner
223749-21-1		skin conditioner	1	skin conditioner
223749-28-8		skin conditioner	1	skin conditioner
223749-33-5		skin conditioner|astringent	1	skin conditioner
223749-44-8		tonic|skin conditioner	1	skin conditioner
223749-52-8		skin conditioner	1	skin conditioner
223749-57-3		skin conditioner	1	skin conditioner
223749-62-0		skin conditioner	1	skin conditioner
223749-74-4		skin conditioner	1	skin conditioner
223749-76-6		skin conditioner	1	skin conditioner
223749-78-8		skin conditioner	1	skin conditioner
223749-79-9		skin conditioner	1	skin conditioner
223749-80-2		skin conditioner	1	skin conditioner
223749-81-3		skin conditioner	1	skin conditioner
223749-83-5		skin conditioner	1	skin conditioner
223749-85-7		skin conditioner	1	skin conditioner
223751-77-7		skin conditioner	1	skin conditioner
224557-89-5		skin conditioner	1	skin conditioner
225234-07-1		skin conditioner	1	skin conditioner
225234-37-7		skin conditioner	1	skin conditioner
225234-40-2		skin conditioner	1	skin conditioner
225234-41-3		skin conditioner	1	skin conditioner
225234-42-4		skin conditioner	1	skin conditioner
225234-43-5		skin conditioner	1	skin conditioner
226994-08-7		skin conditioner	1	skin conditioner
226994-27-0		skin conditioner	1	skin conditioner
226994-28-1		skin conditioner	1	skin conditioner
226994-42-9		skin conditioner	1	skin conditioner
227024-32-0		skin conditioner	1	skin conditioner
227024-35-3		skin conditioner	1	skin conditioner
227024-36-4		skin conditioner	1	skin conditioner
227025-16-3		skin conditioner	1	skin conditioner
227025-32-3		skin conditioner	1	skin conditioner
227025-35-6		skin conditioner	1	skin conditioner
227025-36-7		skin conditioner	1	skin conditioner
227200-19-3		skin conditioner|hair fixer	1	skin conditioner
227200-32-0		skin conditioner	1	skin conditioner
227200-35-3		skin conditioner	1	skin conditioner
227757-38-2		skin conditioner	1	skin conditioner
230309-38-3	Isopropyl lauroyl sarcosinate	skin conditioner	1	skin conditioner	CCCCCCCCCCCC(=O)N(C)CC(=O)OC(C)C
232281-44-6	PUBCHEM_57376026	skin conditioner	1	skin conditioner
235433-33-7		skin conditioner	1	skin conditioner
241153-84-4		skin conditioner	1	skin conditioner
243137-49-7		skin conditioner	1	skin conditioner
244058-54-6		skin conditioner	1	skin conditioner
246536-69-6		skin conditioner	1	skin conditioner
246538-76-1		solvent|skin conditioner	1	skin conditioner
246866-27-3		skin conditioner	1	skin conditioner
283602-75-5		skin conditioner	1	skin conditioner
300711-04-0		skin conditioner	1	skin conditioner
303101-61-3		skin conditioner|oral care	1	skin conditioner
305812-16-2		skin conditioner	1	skin conditioner
342806-97-7		skin conditioner	1	skin conditioner
352458-32-3		skin conditioner|denaturant|abrasive	1	skin conditioner
373387-50-9		skin conditioner|humectant	1	skin conditioner
379685-96-8		skin conditioner	1	skin conditioner
391900-47-3		skin conditioner|astringent	1	skin conditioner
439685-79-7	Hydroxypropyl tetrahydropyrantriol	skin conditioner	1	skin conditioner	CC(O)CC1OCC(O)C(O)C1O
472976-92-4		skin conditioner	1	skin conditioner
477760-85-3		skin conditioner|humectant|hair conditioner	1	skin conditioner
478273-24-4		skin conditioner	1	skin conditioner
494844-53-0	Pentyl rhamnoside	skin conditioner	1	skin conditioner	CCCCCOC1OC(C)C(O)C(O)C1O
501901-81-1		skin conditioner	1	skin conditioner
616204-22-9		skin conditioner|humectant	1	skin conditioner
648426-24-8		skin conditioner	1	skin conditioner
697235-49-7	Hydroxyphenyl propamidobenzoic acid	skin conditioner	1	skin conditioner	OC(=O)C1=CC=CC=C1NC(=O)CCC1=CC=C(O)C=C1
787607-61-8		skin conditioner|humectant|hair conditioner	1	skin conditioner
791838-11-4	Cetylhydroxyproline palmitamide	skin conditioner	1	skin conditioner	CCCCCCCCCCCCCCCCOC(=O)C1CC(O)CN1C(=O)CCCCCCCCCCCCCCC
828918-62-3	Bis-ethoxydiglycol succinate	solvent|skin conditioner|humectant	1	skin conditioner	CCOCCOCCOC(=O)CCC(=O)OCCOCCOCC
828927-84-0		skin conditioner	1	skin conditioner
849775-73-1		skin conditioner	1	skin conditioner
866428-02-6		skin conditioner	1	skin conditioner
913541-96-5		skin conditioner	1	skin conditioner
921608-19-7		skin conditioner	1	skin conditioner
934368-60-2		skin conditioner	1	skin conditioner
942471-70-7		skin conditioner|humectant	1	skin conditioner
1000370-84-2		skin conditioner	1	skin conditioner
1053241-46-5		skin conditioner	1	skin conditioner
1071809-28-3		skin conditioner	1	skin conditioner
51-78-5	4-Aminophenol hydrochloride	hair dye	2	hair dye	NC1=CC=C(O)C=C1
51-81-0		hair dye	2	hair dye
55-55-0		hair dye	2	hair dye
83-56-7	1,5-Dihydroxynaphthalene	hair dye	2	hair dye	OC1=CC=CC2=C(O)C=CC=C12
88-75-5	2-Nitrophenol	hair dye	2	hair dye	OC1=C(C=CC=C1)[N+]([O-])=O
91-56-5	Isatin	hair dye	2	hair dye	O=C1NC2=C(C=CC=C2)C1=O
95-55-6	2-Aminophenol	hair dye	2	hair dye	NC1=C(O)C=CC=C1
95-70-5	2-Methyl-1,4-benzenediamine	hair dye	2	hair dye	CC1=C(N)C=CC(N)=C1
95-88-5	4-Chlororesorcinol	hair dye	2	hair dye	OC1=CC=C(Cl)C(O)=C1
96-91-3	2-Amino-4,6-dinitrophenol	hair dye	2	hair dye	NC1=C(O)C(=CC(=C1)[N+]([O-])=O)[N+]([O-])=O
99-56-9	4-Nitro-1,2-phenylenediamine	hair dye	2	hair dye	NC1=C(N)C=C(C=C1)[N+]([O-])=O
100-02-7	4-Nitrophenol	hair dye	2	hair dye	OC1=CC=C(C=C1)[N+]([O-])=O
101-54-2	N-Phenyl-1,4-benzenediamine	hair dye	2	hair dye	NC1=CC=C(NC2=CC=CC=C2)C=C1
128-95-0	1,4-Diaminoanthraquinone	hair dye	2	hair dye	NC1=CC=C(N)C2=C1C(=O)C1=CC=CC=C1C2=O
141-86-6	2,6-Diaminopyridine	hair dye	2	hair dye	NC1=CC=CC(N)=N1
150-75-4	N-Methyl-p-aminophenol	hair dye	2	hair dye	CNC1=CC=C(O)C=C1
533-73-3	1,2,4-Benzenetriol	hair dye	2	hair dye	OC1=CC=C(O)C(O)=C1
554-84-7	3-Nitrophenol	hair dye	2	hair dye	OC1=CC=CC(=C1)[N+]([O-])=O
582-17-2	2,7-Naphthalenediol	hair dye	2	hair dye	OC1=CC2=CC(O)=CC=C2C=C1
608-25-3	2-Methyl-1,3-benzenediol	hair dye	2	hair dye	CC1=C(O)C=CC=C1O
610-81-1	4-Amino-3-nitrophenol	hair dye	2	hair dye	NC1=C(C=C(O)C=C1)[N+]([O-])=O
615-50-9		hair dye	2	hair dye
615-66-7	2-Chloro-1,4-diaminobenzene	hair dye	2	hair dye	NC1=CC=C(N)C(Cl)=C1
624-18-0	1,4-Benzenediamine dihydrochloride	hair dye	2	hair dye	NC1=CC=C(N)C=C1
989-38-8	Rhodamine 6G	hair dye	2	hair dye	CCNC1=CC2=[O+]C3=C(C=C(C)C(NCC)=C3)C(=C2C=C1C)C1=C(C=CC=C1)C(=O)OCC
1345-00-2		hair dye	2	hair dye
1603-02-7		hair dye	2	hair dye
1742-95-6	1H-Benz[de]isoquinoline-1,3(2H)-dione, 6-amino-	hair dye	2	hair dye	NC1=C2C=CC=C3C(=O)NC(=O)C(C=C1)=C23
2198-59-6	N-Phenyl-1,4-benzenediamine hydrochloride	hair dye	2	hair dye	NC1=CC=C(NC2=CC=CC=C2)C=C1
2380-86-1	6-Hydroxyindole	hair dye	2	hair dye	OC1=CC2=C(C=CN2)C=C1
2784-89-6	1,4-Benzenediamine, 2-nitro-N1-phenyl-	hair dye	2	hair dye	NC1=CC(=C(NC2=CC=CC=C2)C=C1)[N+]([O-])=O
2835-98-5	6-Amino-m-cresol	hair dye	2	hair dye	CC1=CC(O)=C(N)C=C1
2835-99-6	4-Amino-m-cresol	hair dye	2	hair dye	CC1=CC(O)=CC=C1N
2871-01-4	HC Red 3	hair dye	2	hair dye	NC1=CC(=C(NCCO)C=C1)[N+]([O-])=O
3068-39-1		hair dye	2	hair dye
3131-52-0	5,6-Dihydroxyindole	hair dye	2	hair dye	OC1=C(O)C=C2C=CNC2=C1
3179-89-3		hair dye	2	hair dye
3333-62-8	7-(2H-Naphtho[1,2-d]triazol-2-yl)-3-phenylcoumarin	hair dye	2	hair dye	O=C1OC2=CC(=CC=C2C=C1C1=CC=CC=C1)N1N=C2C=CC3=CC=CC=C3C2=N1
4430-25-5	Phenol, 4,4'-(4,5,6,7-tetrabromo-1,1-dioxido-3H-2,1-benzoxathiol-3-ylidene)bis[2,6-dibromo-	hair dye	2	hair dye	OC1=C(Br)C=C(C=C1Br)C1(OS(=O)(=O)C2=C(Br)C(Br)=C(Br)C(Br)=C12)C1=CC(Br)=C(O)C(Br)=C1
4698-29-7		hair dye	2	hair dye
4926-55-0	Ethanol, 2-[(2-nitrophenyl)amino]-	hair dye	2	hair dye	OCCNC1=C(C=CC=C1)[N+]([O-])=O
5392-28-9	tetra-Aminopyrimidine sulfate	hair dye	2	hair dye	NC1=NC(N)=C(N)C(N)=N1
5697-02-9	1-Acetoxy-2-methylnaphthalene	hair dye	2	hair dye	CC(=O)OC1=C(C)C=CC2=CC=CC=C12
6219-77-8	1,2-Benzenediamine, 4-nitro-, hydrochloride (1:2)	hair dye	2	hair dye	NC1=C(N)C=C(C=C1)[N+]([O-])=O
6358-09-4	2-Amino-6-chloro-4-nitrophenol	hair dye	2	hair dye	NC1=C(O)C(Cl)=CC(=C1)[N+]([O-])=O
6359-45-1	C.I.Basic Violet 16	hair dye	2	hair dye	CCN(CC)c1ccc(\C=C\C2=[N+](C)c3ccccc3C2(C)C)cc1
6994-64-5	3-Amino-2,6-dimethylphenol	hair dye	2	hair dye	CC1=C(O)C(C)=C(N)C=C1
7218-02-2	2,6-Dimethyl-p-phenylenediamine	hair dye	2	hair dye	CC1=CC(N)=CC(C)=C1N
7469-77-4	2-Methyl-1-naphthol	hair dye	2	hair dye	CC1=C(O)C2=CC=CC=C2C=C1
10442-83-8	HC Yellow no. 13	hair dye	2	hair dye	OCCNC1=C(C=C(C=C1)C(F)(F)F)[N+]([O-])=O
11118-33-5		hair dye	2	hair dye
12222-69-4	Ethanol, 2,2'-[[4-[(4-aminophenyl)azo]phenyl]imino]bis-	hair dye	2	hair dye	Nc1ccc(cc1)\N=N\c1ccc(cc1)N(CCO)CCO
12227-64-4		hair dye	2	hair dye
12703-66-1		hair dye	2	hair dye
14295-43-3	C.I. Pigment Red 88	hair dye	2	hair dye	ClC1=CC=C(Cl)C2=C1S\C(C2=O)=C1\SC2=C(Cl)C=CC(Cl)=C2C1=O
16245-77-5	1,4-Benzenediamine, sulfate (1:1)	hair dye	2	hair dye	NC1=CC=C(N)C=C1
16867-03-1	2-Amino-3-hydroxypyridine	hair dye	2	hair dye	NC1=C(O)C=CC=N1
20721-50-0	Ethanol, 2,2'-[[4-[(4-aminophenyl)azo]phenyl]imino]bis-	hair dye	2	hair dye	Nc1ccc(cc1)\N=N\c1ccc(cc1)N(CCO)CCO
23920-15-2		hair dye	2	hair dye
24905-87-1	2-(4-Amino-3-nitroanilino)ethanol	hair dye	2	hair dye	NC1=C(C=C(NCCO)C=C1)[N+]([O-])=O
25154-55-6		hair dye	2	hair dye
26021-57-8	2H-1,4-Benzoxazin-6-ol, 3,4-dihydro-	hair dye	2	hair dye	OC1=CC2=C(OCCN2)C=C1
26381-41-9		hair dye	2	hair dye
26455-21-0		hair dye	2	hair dye
27080-42-8		hair dye	2	hair dye
27311-52-0	2,2'-Methylenebis(4-aminophenol) dihydrochloride	hair dye	2	hair dye	NC1=CC(CC2=C(O)C=CC(N)=C2)=C(O)C=C1
28365-08-4	2,6-Diamino-3-((pyridin-3-yl)azo)pyridine	hair dye	2	hair dye	NC1=NC(N)=C(C=C1)\N=N\C1=CN=CC=C1
29539-03-5		hair dye	2	hair dye
29556-33-0		hair dye	2	hair dye
33229-34-4	HC Blue 2	hair dye	2	hair dye	OCCNC1=C(C=C(C=C1)N(CCO)CCO)[N+]([O-])=O
35011-47-3		hair dye	2	hair dye
38866-20-5	4-(3-((9,10-Dihydro-4-hydroxy-9,10-dioxo-1-anthracenyl)amino)prop- yl)-4-methyl morpholinium methyl sulfate	hair dye	2	hair dye	C[N+]1(CCCNc2ccc(O)c3C(=O)c4ccccc4C(=O)c23)CCOCC1
39267-74-8	2,5,6-Triamino-4-pyrimidinol sulfate	hair dye	2	hair dye	NC1C(N)=NC(N)=NC1=O
42909-29-5		hair dye	2	hair dye
52551-67-4	2-[Bis(2-hydroxyethyl)amino]-5-nitrophenol	hair dye	2	hair dye	OCCN(CCO)C1=C(O)C=C(C=C1)[N+]([O-])=O
54381-08-7	Phenol, 4-[(2-nitrophenyl)amino]-	hair dye	2	hair dye	OC1=CC=C(NC2=C(C=CC=C2)[N+]([O-])=O)C=C1
54381-16-7	2,2'-[(4-Aminophenyl)imino]bisethanol sulfate	hair dye	2	hair dye	NC1=CC=C(C=C1)N(CCO)CCO
55302-96-0	5-((2-Hydroxyethyl)amino)-2-methylphenol	hair dye	2	hair dye	CC1=C(O)C=C(NCCO)C=C1
56216-28-5		hair dye	2	hair dye
56496-89-0	2,6-Dimethyl-p-phenylenediamine dihydrochloride	hair dye	2	hair dye	CC1=CC(N)=CC(C)=C1N
57524-61-5		hair dye	2	hair dye
58262-44-5		hair dye	2	hair dye
59820-43-8	HC Yellow 4	hair dye	2	hair dye	OCCNC1=C(OCCO)C=C(C=C1)[N+]([O-])=O
59820-63-2	Ethanol, 2-(3-(methylamino)-4-nitrophenoxy)-	hair dye	2	hair dye	CNC1=C(C=CC(OCCO)=C1)[N+]([O-])=O
61693-42-3	3-Amino-2,4-dichlorophenol	hair dye	2	hair dye	NC1=C(Cl)C=CC(O)=C1Cl
61693-43-4	3-Amino-2,4-dichlorophenol hydrochloride	hair dye	2	hair dye	NC1=C(Cl)C=CC(O)=C1Cl
61702-44-1	2-Chloro-1,4-diaminobenzene sulfate	hair dye	2	hair dye	NC1=CC=C(N)C(Cl)=C1
62649-65-4	1-Amino-4-((1-methylethyl)amino)anthraquinone	hair dye	2	hair dye	CC(C)NC1=C2C(=O)C3=CC=CC=C3C(=O)C2=C(N)C=C1
63084-98-0		hair dye	2	hair dye
63969-46-0	2,2'-Methylenebis(4-aminophenol)	hair dye	2	hair dye	NC1=CC(CC2=C(O)C=CC(N)=C2)=C(O)C=C1
65235-31-6	4-((2-Hydroxyethyl)amino)-3-nitrophenol	hair dye	2	hair dye	OCCNC1=C(C=C(O)C=C1)[N+]([O-])=O
66095-81-6		hair dye	2	hair dye
66422-95-5	Ethanol, 2-(2,4-diaminophenoxy)-, hydrochloride (1:2)	hair dye	2	hair dye	NC1=CC=C(OCCO)C(N)=C1
66671-82-7	1,4-Benzenediamine, 2-methoxy-, sulfate (1:1)	hair dye	2	hair dye	COC1=C(N)C=CC(N)=C1
67674-26-4	9,10-Anthracenedione, 1-[(2-hydroxyethyl)amino]-4-[(3-hydroxypropyl)amino]-	hair dye	2	hair dye	OCCCNC1=C2C(=O)C3=C(C=CC=C3)C(=O)C2=C(NCCO)C=C1
67845-79-8		hair dye	2	hair dye
68123-13-7		hair dye	2	hair dye
68239-81-6		hair dye	2	hair dye
68239-82-7		hair dye	2	hair dye
68259-00-7	Pyridinium, 1-methyl-4-[(methylphenylhydrazono)methyl]-, methyl sulfate	hair dye	2	hair dye	CN(\N=C\c1cc[n+](C)cc1)c1ccccc1
68391-30-0		hair dye	2	hair dye
68391-31-1		hair dye	2	hair dye
68391-32-2		hair dye	2	hair dye
68427-35-0	3-[5-(Aminosulfonyl)benzoxazol-2-yl]-7-(diethylamino)coumarin	hair dye	2	hair dye	CCN(CC)C1=CC=C2C=C(C3=NC4=C(O3)C=CC(=C4)S(N)(=O)=O)C(=O)OC2=C1
70643-20-8		hair dye	2	hair dye
73398-25-1		hair dye	2	hair dye
73398-89-7		hair dye	2	hair dye
74578-10-2	Benzenamine, 4-[(2,6-dichlorophenyl)(4-imino-3,5-dimethyl-2,5-cyclohexadien-1-ylidene)methyl]-2,6-dimethyl-, phosphate (1:1)	hair dye	2	hair dye	CC1=CC(C=C(C)C1=N)=C(c1cc(C)c(N)c(C)c1)c1c(Cl)cccc1Cl
74918-21-1	Colorex 13bis	hair dye	2	hair dye	Nc1ccc(OCCCOc2ccc(N)cc2N)c(N)c1
77061-58-6		hair dye	2	hair dye
80062-31-3		hair dye	2	hair dye
81892-72-0		hair dye	2	hair dye
82576-75-8	HC Violet no. 1	hair dye	2	hair dye	CC1=CC(N)=C(C=C1NCCO)[N+]([O-])=O
83732-72-3		hair dye	2	hair dye
83763-47-7	2-Amino-4-hydroxyethylaminoanisole	hair dye	2	hair dye	COC1=C(N)C=C(NCCO)C=C1
83763-48-8		hair dye	2	hair dye
84041-77-0	N,N'-Bis(2-hydroxyethyl)-2-nitro-p-phenylenediamine	hair dye	2	hair dye	OCCNC1=CC(=C(NCCO)C=C1)[N+]([O-])=O
84540-47-6	2,6-Dihydroxy-3,4-dimethylpyridine	hair dye	2	hair dye	CC1C(C)=CC(=O)NC1=O
85765-48-6	HC Orange no. 2	hair dye	2	hair dye	NCCNC1=C(C=C(OCCO)C=C1)[N+]([O-])=O
86419-69-4	HC Yellow no. 9	hair dye	2	hair dye	COc1ccc(c(NCCN)c1)[N+]([O-])=O
90349-40-9		hair dye	2	hair dye
90648-73-0	HC Red no. 15	hair dye	2	hair dye	NC1=CC(=C(NCCCO)C=C1)[N+]([O-])=O
90817-34-8	90817-34-8	hair dye	2	hair dye
92952-81-3	4-Hydroxypropylamino-3-nitrophenol	hair dye	2	hair dye	OCCCNC1=C(C=C(O)C=C1)[N+]([O-])=O
93841-25-9		hair dye	2	hair dye
94158-13-1	2,2'-((4-Amino-3-nitrophenyl)imino)bisethanol hydrochloride	hair dye	2	hair dye	NC1=C(C=C(C=C1)N(CCO)CCO)[N+]([O-])=O
94158-14-2	Hydroxyethyl-3,4-methylenedioxyaniline HCl	hair dye	2	hair dye	OCCNc1ccc2OCOc2c1
95576-89-9		hair dye	2	hair dye
95576-92-4		hair dye	2	hair dye
97404-02-9		hair dye	2	hair dye
97404-13-2	1-((2-Aminoethyl)amino)anthraquinone, monohydrochloride	hair dye	2	hair dye	NCCNc1cccc2C(=O)c3ccccc3C(=O)c12
99610-72-7	2-Hydroxyethyl picramic acid	hair dye	2	hair dye	OCCNC1=C(O)C(=CC(=C1)[N+]([O-])=O)[N+]([O-])=O
99788-75-7		hair dye	2	hair dye
100418-33-5	Hydroxyethyl-2-nitro-p-toluidine	hair dye	2	hair dye	CC1=CC(=C(NCCO)C=C1)[N+]([O-])=O
104226-19-9	HC Violet no. 2	hair dye	2	hair dye	OCCCNC1=C(C=C(C=C1)N(CCO)CCO)[N+]([O-])=O
104226-21-3		hair dye	2	hair dye
104516-93-0	104516-93-0	hair dye	2	hair dye
109023-83-8	HC Yellow no. 10	hair dye	2	hair dye	OCCNC1=CC(NCCO)=C(Cl)C=C1[N+]([O-])=O
110102-85-7		hair dye	2	hair dye
110102-86-8	5-Amino-4-chloro-o-cresol	hair dye	2	hair dye	CC1=CC(Cl)=C(N)C=C1O
117907-43-4	4-Amino-2-nitrodiphenylamine-2'-carboxylic acid	hair dye	2	hair dye	NC1=CC(=C(NC2=CC=CC=C2C(O)=O)C=C1)[N+]([O-])=O
128729-28-2	Hydroxypropyl bis(N-hydroxyethyl-p-phenylenediamine) hydrochloride	hair dye	2	hair dye	Nc1ccc(cc1)N(CCO)CC(O)CN(CCO)c1ccc(N)cc1
131657-78-8	2-Chloro-6-ethylamino-4-nitrophenol	hair dye	2	hair dye	CCNC1=C(O)C(Cl)=CC(=C1)[N+]([O-])=O
132885-85-9		hair dye	2	hair dye
138377-66-9	HC Yellow no. 15	hair dye	2	hair dye	NC(=O)C1=CC(=C(NCCO)C=C1)[N+]([O-])=O
138937-28-7		hair dye	2	hair dye
146997-97-9		hair dye	2	hair dye
149330-25-6	2,6-Dihydroxyethylaminotoluene	hair dye	2	hair dye	CC1=C(NCCO)C=CC=C1NCCO
149861-22-3	2-Amino-5-ethylphenol hydrochloride	hair dye	2	hair dye	CCC1=CC(O)=C(N)C=C1
155601-30-2	4,5-Diamino-1-(2-hydroxyethyl)pyrazole sulfate	hair dye	2	hair dye	NC1=C(N)N(CCO)N=C1
173994-76-8		hair dye	2	hair dye
173994-77-9		hair dye	2	hair dye
173994-78-0	N-Isopropyl 4,5-diamino pyrazole sulfate	hair dye	2	hair dye	CC(C)N1N=CC(N)=C1N
217311-43-8	4-Fluoro-6-methyl-m-phenylenediamine sulfate	hair dye	2	hair dye	Cc1cc(F)c(N)cc1N
223398-02-5		hair dye	2	hair dye
226940-14-3		hair dye	2	hair dye
337906-37-3	2-Methoxymethyl-p-phenylenediamine sulfate	hair dye	2	hair dye	COCC1=C(N)C=CC(N)=C1
502453-61-4	HC Blue no.16	hair dye	2	hair dye	CCC[N+](C)(C)CCCNc1ccc(NC)c2C(=O)c3ccccc3C(=O)c12
857035-95-1		hair dye	2	hair dye
50-01-1	Guanidine monohydrochloride	buffer	3	buffer	NC(N)=N
56-18-8	Iminobis-3-propylamine	buffer	3	buffer	NCCCNCCCN
69-93-2	Uric acid	skin conditioner|buffer	3	buffer	O=C1NC2C(N1)=NC(=O)NC2=O
76-93-7	Benzilic acid	buffer	3	buffer	OC(=O)C(O)(C1=CC=CC=C1)C1=CC=CC=C1
77-95-2		buffer	3	buffer
79-14-1	Glycolic acid	cleaner|buffer|antimicrobial|antibacterial	3	buffer	OCC(O)=O
96-82-2	Lactobionic acid	buffer	3	buffer	OCC(O)C(OC1OC(CO)C(O)C(O)C1O)C(O)C(O)C(O)=O
97-67-6	(2S)-2-Hydroxybutanedioic acid	buffer	3	buffer
99-14-9	1,2,3-Propanetricarboxylic acid	chelator|buffer	3	buffer	OC(=O)CC(CC(O)=O)C(O)=O
100-37-8	N,N-Diethylethanolamine	emulsifier|dispersant|buffer	3	buffer	CCN(CC)CCO
102-79-4	N-Butyldiethanolamine	buffer	3	buffer	CCCCN(CCO)CCO
102-81-8	2-(Dibutylamino)ethanol	buffer	3	buffer	CCCCN(CCO)CCCC
108-01-0	Dimethylaminoethanol	dispersant|colorant|buffer	3	buffer	CN(C)CCO
109-83-1	N-Methylethanolamine	dispersant|buffer	3	buffer	CNCCO
110-16-7	Maleic acid	buffer	3	buffer	OC(=O)\C=C\C(O)=O
110-73-6	2-(Ethylamino)ethanol	buffer	3	buffer	CCNCCO
111-20-6	Decanedioic acid	buffer	3	buffer	OC(=O)CCCCCCCCC(O)=O
124-09-4	1,6-Hexanediamine	buffer	3	buffer	NCCCCCCN
140-07-8	2,2',2'',2'''-(1,2-Ethanediyldinitrilo)tetrakisethanol	chelator|buffer	3	buffer	OCCN(CCO)CCN(CCO)CCO
143-74-8	Phenol red	buffer	3	buffer	OC1=CC=C(C=C1)C1(OS(=O)(=O)C2=C1C=CC=C2)C1=CC=C(O)C=C1
147-71-7	Tartaric acid; d form	masking agent|buffer	3	buffer	OC(C(O)C(O)=O)C(O)=O
288-32-4	Imidazole	buffer	3	buffer	N1C=CN=C1
298-12-4	Glyoxylic acid	buffer	3	buffer	OC(=O)C=O
304-59-6		buffer	3	buffer
534-42-9		buffer	3	buffer
554-13-2	Lithium carbonate	hair waving straightener|buffer	3	buffer	OC(O)=O
562-73-2		buffer	3	buffer
576-37-4		humectant|chelator|buffer	3	buffer
593-85-1		skin conditioner|buffer	3	buffer
616-30-8		buffer	3	buffer
685-73-4	D-Galacturonic acid	humectant|chelator|buffer	3	buffer	OC(C=O)C(O)C(O)C(O)C(O)=O
814-80-2		keratolytic|buffer|astringent	3	buffer
868-18-8	Disodium tartrate	buffer	3	buffer	OC(C(O)C(O)=O)C(O)=O
877-24-7	Monopotassium phthalate	buffer	3	buffer	OC(=O)C1=CC=CC=C1C(O)=O
921-53-9		buffer	3	buffer
996-31-6		skin conditioner|humectant|buffer	3	buffer
1066-33-7	Ammonium hydrogen carbonate	buffer	3	buffer	OC(O)=O
1111-78-0	Ammonium carbamate	buffer	3	buffer	NC(O)=O
1302-42-7		buffer|anticorrosive	3	buffer
1305-62-0		buffer|antimicrobial	3	buffer
1305-78-8		buffer|antimicrobial	3	buffer
1310-65-2		hair waving straightener|buffer	3	buffer
1311-10-0		buffer	3	buffer
1313-59-3		buffer	3	buffer
1314-56-3		chelator|buffer	3	buffer
1332-77-0		buffer	3	buffer
2002-24-6	2-Aminoethanol hydrochloride	buffer	3	buffer	NCCO
2836-32-0	Glycolic acid sodium salt	buffer	3	buffer	OCC(O)=O
2922-54-5	Monosodium succinate	buffer	3	buffer	OC(=O)CCC(O)=O
3012-65-5	Ammonium citrate (2:1)	chelator|buffer	3	buffer	OC(=O)CC(O)(CC(O)=O)C(O)=O
5324-47-0	Sodium ethanesulphonate	buffer	3	buffer	CCS(O)(=O)=O
5873-57-4		buffer	3	buffer
6484-52-2		buffer	3	buffer
6976-37-0	1,3-Propanediol, 2-[bis(2-hydroxyethyl)amino]-2-(hydroxymethyl)-	buffer	3	buffer	OCCN(CCO)C(CO)(CO)CO
7320-34-5		oral care|chelator|buffer	3	buffer
7322-88-5		buffer	3	buffer
7360-53-4		buffer	3	buffer
7365-45-9	(4-(2-Hydroxyethyl)-1-piperazineethanesulfonic acid	buffer	3	buffer	OCC[NH+]1CCN(CCS([O-])(=O)=O)CC1
7376-31-0	Triethanolamine sulfate	buffer	3	buffer	OCCN(CCO)CCO
7558-79-4		masking agent|buffer|anticorrosive	3	buffer
7601-53-8	Triethanolamine hydriodide	skin conditioner|buffer	3	buffer	OCCN(CCO)CCO
7601-54-9		chelator|buffer	3	buffer
7704-73-6	Sodium fumarate	buffer	3	buffer	OC(=O)\C=C\C(O)=O
7722-88-5		oral care|chelator|buffer|anticaking agent	3	buffer
7758-11-4		buffer|anticorrosive	3	buffer
7758-29-4		chelator|buffer	3	buffer
7778-77-0		buffer	3	buffer
7782-85-6		masking agent|buffer|anticorrosive	3	buffer
7783-28-0		oral care|buffer|anticorrosive	3	buffer
7785-84-4		chelator|buffer|anticaking agent	3	buffer
7803-55-6		buffer	3	buffer
10035-10-6		buffer	3	buffer
10377-81-8	2-Aminoethanol ester with boric acid (H3BO3) (1:1)	buffer	3	buffer	NCCOB(O)O
11113-50-1		denaturant|buffer|antimicrobial	3	buffer
12054-85-2		buffer	3	buffer
12136-45-7		buffer	3	buffer
13682-92-3		viscosity controlling agent|buffer|astringent	3	buffer
13845-36-8		chelator|buffer	3	buffer
14281-83-5		buffer	3	buffer
14783-68-7		buffer	3	buffer
16068-46-5		buffer	3	buffer
17013-01-3	Disodium fumarate	buffer	3	buffer	OC(=O)\C=C\C(O)=O
17812-24-7		chelator|buffer	3	buffer
18480-07-4		buffer	3	buffer
18917-91-4		odor eliminator|buffer|astringent	3	buffer
23351-51-1		skin conditioner|buffer	3	buffer
32817-15-5		buffer	3	buffer
35947-07-0		skin conditioner|buffer	3	buffer
37267-86-0		chelator|buffer	3	buffer
41354-48-7		buffer|astringent	3	buffer
50652-76-1		skin conditioner|buffer	3	buffer
50813-16-6		oral care|chelator|buffer	3	buffer
51019-43-3		buffer	3	buffer
51750-56-2		chelator|buffer	3	buffer
67990-17-4	Acetic acid, (2-butoxyethoxy)-, sodium salt	buffer	3	buffer	CCCCOCCOCC(O)=O
68131-04-4		chelator|buffer|antimicrobial|absorber	3	buffer
68953-69-5		buffer|astringent	3	buffer
85895-78-9	Propanoic acid, 2-hydroxy-, monopotassium salt, (2S)-	skin conditioner|humectant|buffer	3	buffer	CC(O)C(O)=O
150607-22-0		bulking agent|buffer	3	buffer
50-00-0	Formaldehyde	preservative|fragrance|colorant|antimicrobial	4	antimicrobial	C=O
54-11-5	Nicotine	antimicrobial	4	antimicrobial	CN1CCCC1C1=CN=CC=C1
55-56-1	Chlorhexidine	preservative|oral care|antimicrobial	4	antimicrobial	ClC1=CC=C(NC(=N)NC(=N)NCCCCCCNC(=N)NC(=N)NC2=CC=C(Cl)C=C2)C=C1
56-35-9		antimicrobial	4	antimicrobial
56-95-1	Chlorhexidine diacetate	preservative|oral care|antimicrobial	4	antimicrobial	ClC1=CC=C(NC(=N)NC(=N)NCCCCCCNC(=N)NC(=N)NC2=CC=C(Cl)C=C2)C=C1
57-06-7	Allyl isothiocyanate	fragrance|flavorant|antimicrobial	4	antimicrobial	C=CCN=C=S
57-09-0	Hexadecyltrimethylammonium bromide	surfactant|preservative|emulsifier|antistatic agent|antimicrobial	4	antimicrobial	CCCCCCCCCCCCCCCC[N+](C)(C)C
58-36-6		biocide|antimicrobial	4	antimicrobial
70-30-4	Hexachlorophene	antimicrobial	4	antimicrobial	OC1=C(CC2=C(Cl)C(Cl)=CC(Cl)=C2O)C(Cl)=C(Cl)C=C1Cl
74-83-9	Methyl bromide	antimicrobial	4	antimicrobial	CBr
75-21-8	Ethylene oxide	antimicrobial	4	antimicrobial	C1CO1
75-47-8	Iodoform	antimicrobial	4	antimicrobial	IC(I)I
75-56-9	1,2-Propylene oxide	antimicrobial	4	antimicrobial	CC1CO1
76-06-2	Chloropicrin	antimicrobial	4	antimicrobial	[O-][N+](=O)C(Cl)(Cl)Cl
76-87-9		antimicrobial	4	antimicrobial
77-48-5	1,3-Dibromo-5,5-dimethylhydantoin	antimicrobial	4	antimicrobial	CC1(C)N(Br)C(=O)N(Br)C1=O
79-09-4	Propionic acid	preservative|fragrance|flavorant|antimicrobial	4	antimicrobial	CCC(O)=O
79-21-0	Peracetic acid	antimicrobial	4	antimicrobial	CC(=O)OO
80-33-1	Chlorfenson	antimicrobial	4	antimicrobial	ClC1=CC=C(OS(=O)(=O)C2=CC=C(Cl)C=C2)C=C1
80-46-6	4-(2-Methylbutan-2-yl)phenol	antimicrobial	4	antimicrobial	CCC(C)(C)C1=CC=C(O)C=C1
83-79-4	Rotenone	antimicrobial	4	antimicrobial	COc1cc2OCC3Oc4c5CC(Oc5ccc4C(=O)C3c2cc1OC)C(C)=C
85-00-7	Diquat dibromide	antimicrobial	4	antimicrobial	C1C[N+]2=C(C=CC=C2)C2=CC=CC=[N+]12
86-75-9	Benzoxiquine	antimicrobial	4	antimicrobial	O=C(OC1=CC=CC2=C1N=CC=C2)C1=CC=CC=C1
86-87-3	1-Naphthaleneacetic acid	antimicrobial	4	antimicrobial	OC(=O)CC1=C2C=CC=CC2=CC=C1
87-86-5	Pentachlorophenol	antimicrobial	4	antimicrobial	OC1=C(Cl)C(Cl)=C(Cl)C(Cl)=C1Cl
88-04-0	4-Chloro-3,5-dimethylphenol	preservative|odor eliminator|fragrance|antimicrobial	4	antimicrobial	CC1=CC(O)=CC(C)=C1Cl
89-68-9	6-Chlorothymol	oral care|odor eliminator|denaturant|antiplaque agent|antimicrobial	4	antimicrobial	CC(C)C1=CC(Cl)=C(C)C=C1O
89-83-8	Thymol	masking agent|hair dye|fragrance|flavorant|denaturant|antimicrobial	4	antimicrobial	CC(C)C1=CC=C(C)C=C1O
90-43-7	2-Phenylphenol	preservative|antimicrobial	4	antimicrobial	OC1=C(C=CC=C1)C1=CC=CC=C1
90-64-2	Mandelic acid	antimicrobial	4	antimicrobial	OC(C(O)=O)C1=CC=CC=C1
93-23-2	2-Dodecylisoquinolinium bromide	surfactant|odor eliminator|antistatic agent|antimicrobial	4	antimicrobial	CCCCCCCCCCCC[N+]1=CC2=C(C=CC=C2)C=C1
97-23-4	Dichlorophen	odor eliminator|antimicrobial	4	antimicrobial	OC1=CC=C(Cl)C=C1CC1=CC(Cl)=CC=C1O
97-24-5	Fenticlor	antimicrobial	4	antimicrobial	OC1=CC=C(Cl)C=C1SC1=CC(Cl)=CC=C1O
100-67-4		antimicrobial	4	antimicrobial
101-20-2	Triclocarban	preservative|odor eliminator|antimicrobial	4	antimicrobial	ClC1=CC=C(NC(=O)NC2=CC=C(Cl)C(Cl)=C2)C=C1
104-29-0	Chlorphenesin	preservative|antimicrobial	4	antimicrobial	OCC(O)COC1=CC=C(Cl)C=C1
104-74-5	1-Dodecylpyridinium chloride	surfactant|odor eliminator|antistatic agent|antimicrobial	4	antimicrobial	CCCCCCCCCCCC[N+]1=CC=CC=C1
106-48-9	4-Chlorophenol	antimicrobial	4	antimicrobial	OC1=CC=C(Cl)C=C1
107-02-8	Acrolein	fragrance|flavorant|antimicrobial	4	antimicrobial	C=CC=O
111-47-7	Propyl sulfide	flavorant|biocide|antimicrobial	4	antimicrobial	CCCSCCC
112-02-7	Hexadecyl trimethyl ammonium chloride	surfactant|preservative|emulsifier|antistatic agent|antimicrobial	4	antimicrobial	CCCCCCCCCCCCCCCC[N+](C)(C)C
112-65-2	Dodecylguanidine	antimicrobial	4	antimicrobial	CCCCCCCCCCCCNC(N)=N
113-48-4	MGK-264	antimicrobial	4	antimicrobial	CCCCC(CC)CN1C(=O)C2C3CC(C=C3)C2C1=O
116-25-6	1-(Hydroxymethyl)-5,5-dimethylhydantoin	antimicrobial	4	antimicrobial	CC1(C)N(CO)C(=O)NC1=O
117-80-6	Dichlone	antimicrobial	4	antimicrobial	ClC1=C(Cl)C(=O)C2=C(C=CC=C2)C1=O
118-52-5	1,3-Dichloro-5,5-dimethylhydantoin	antimicrobial	4	antimicrobial	CC1(C)N(Cl)C(=O)N(Cl)C1=O
120-32-1	Clorophene	preservative|colorant|antimicrobial	4	antimicrobial	OC1=C(CC2=CC=CC=C2)C=C(Cl)C=C1
121-54-0	Benzethonium chloride	surfactant|preservative|odor eliminator|antimicrobial	4	antimicrobial	CC(C)(C)CC(C)(C)C1=CC=C(OCCOCC[N+](C)(C)CC2=CC=CC=C2)C=C1
122-18-9	Benzylhexadecyldimethylammonium chloride	preservative|antistatic agent|antimicrobial	4	antimicrobial	CCCCCCCCCCCCCCCC[N+](C)(C)CC1=CC=CC=C1
122-34-9	Simazine	antimicrobial	4	antimicrobial	CCNC1=NC(NCC)=NC(Cl)=N1
123-03-5	Cetylpyridinium chloride	surfactant|oral care|odor eliminator|hair conditioner|emulsifier|antistatic agent|antimicrobial	4	antimicrobial	CCCCCCCCCCCCCCCC[N+]1=CC=CC=C1
123-47-7		antimicrobial	4	antimicrobial
124-03-8	Ethylhexadecyldimethylammonium bromide	surfactant|emulsifier|antistatic agent|antimicrobial	4	antimicrobial	CCCCCCCCCCCCCCCC[N+](C)(C)CC
124-38-9	Carbon dioxide	propellant|fragrance|antimicrobial	4	antimicrobial	O=C=O
125-46-2	Usnic acid	antimicrobial	4	antimicrobial	CC(=O)C1C(=O)C=C2OC3=C(C(O)=C(C)C(O)=C3C(C)=O)C2(C)C1=O
126-06-7	3-Bromo-1-chloro-5,5-dimethylhydantoin	antimicrobial	4	antimicrobial	CC1(C)N(Cl)C(=O)N(Br)C1=O
126-11-4	2-(Hydroxymethyl)-2-nitro-1,3-propanediol	antimicrobial	4	antimicrobial	OCC(CO)(CO)[N+]([O-])=O
126-96-5		flavorant|antimicrobial	4	antimicrobial
127-65-1	Chloramine-T	antimicrobial	4	antimicrobial	CC1=CC=C(C=C1)S(=O)(=O)NCl
127-82-2		odor eliminator|astringent|antimicrobial	4	antimicrobial
128-03-0	Potassium dimethyldithiocarbamate	antimicrobial	4	antimicrobial	CN(C)C(S)=S
132-27-4	Sodium 2-phenylphenate	preservative|antimicrobial	4	antimicrobial	OC1=C(C=CC=C1)C1=CC=CC=C1
133-06-2	Captan	antimicrobial	4	antimicrobial	ClC(Cl)(Cl)SN1C(=O)C2CC=CCC2C1=O
133-07-3	Folpet	biocide|antimicrobial	4	antimicrobial	ClC(Cl)(Cl)SN1C(=O)C2=C(C=CC=C2)C1=O
133-53-9	2,4-Dichloro-3,5-dimethylphenol	odor eliminator|antimicrobial	4	antimicrobial	CC1=CC(O)=C(Cl)C(C)=C1Cl
134-31-6		emulsion stabilizer|antimicrobial	4	antimicrobial
135-58-0	Mesulfen	skin conditioner|antimicrobial	4	antimicrobial	CC1=CC2=C(SC3=CC(C)=CC=C3S2)C=C1
136-45-8	Dipropyl 2,5-pyridinedicarboxylate	antimicrobial	4	antimicrobial	CCCOC(=O)C1=CC=C(N=C1)C(=O)OCCC
136-77-6	4-Hexylresorcinol	antimicrobial	4	antimicrobial	CCCCCCC1=C(O)C=C(O)C=C1
137-41-7	Potassium N-methyldithiocarbamate	antimicrobial	4	antimicrobial	CNC(S)=S
137-42-8	Metam-sodium	antimicrobial	4	antimicrobial	CNC(S)=S
138-93-2	Disodium cyanodithioimidocarbonate	antimicrobial	4	antimicrobial	SC(=S)NC#N
139-02-6	Sodium phenolate	antimicrobial	4	antimicrobial	OC1=CC=CC=C1
139-08-2	Tetradecyldimethylbenzylammonium chloride	preservative|antimicrobial	4	antimicrobial	CCCCCCCCCCCCCC[N+](C)(C)CC1=CC=CC=C1
139-12-8		astringent|antimicrobial	4	antimicrobial
140-95-4	Dimethylolurea	antimicrobial	4	antimicrobial	OCNC(=O)NCO
142-03-0		astringent|antimicrobial	4	antimicrobial
142-59-6	Nabam-sodium	antimicrobial	4	antimicrobial	SC(=S)NCCNC(S)=S
298-02-2	Phorate	antimicrobial	4	antimicrobial	CCOP(=S)(OCC)SCSCC
330-54-1	Diuron	antimicrobial	4	antimicrobial	CN(C)C(=O)NC1=CC(Cl)=C(Cl)C=C1
369-77-7	Cloflucarban	odor eliminator|antimicrobial	4	antimicrobial	FC(F)(F)C1=C(Cl)C=CC(NC(=O)NC2=CC=C(Cl)C=C2)=C1
463-57-0	Methylene glycol	nail conditioner|antimicrobial	4	antimicrobial	OCO
500-22-1	3-Pyridinecarboxaldehyde	antimicrobial	4	antimicrobial	O=CC1=CC=CN=C1
502-47-6	Citronellic acid	masking agent|fragrance|flavorant|antimicrobial|antidandruff	4	antimicrobial	CC(CCC=C(C)C)CC(O)=O
511-15-9	Totarol	oral care|odor eliminator|antioxidant	4	antimicrobial	CC(C)c1c(O)ccc2c1CCC1C(C)(C)CCCC21C
522-51-0	Dequalinium dichloride	oral care|odor eliminator|antiplaque agent|antimicrobial	4	antimicrobial	CC1=CC(N)=C2C=CC=CC2=[N+]1CCCCCCCCCC[N+]1=C2C=CC=CC2=C(N)C=C1C
534-16-7	Silver(I) carbonate	antimicrobial|antidandruff	4	antimicrobial	OC(O)=O
536-45-8	Sodium anisate	flavorant|antimicrobial	4	antimicrobial	COC1=CC=C(C=C1)C(O)=O
538-71-6	Domiphen bromide	oral care|odor eliminator|antiplaque agent|antimicrobial	4	antimicrobial	CCCCCCCCCCCC[N+](C)(C)CCOC1=CC=CC=C1
542-75-6	1,3-Dichloropropene	antimicrobial	4	antimicrobial	ClC\C=C/Cl
555-32-8		viscosity controlling agent|antimicrobial	4	antimicrobial
556-61-6	Methyl isothiocyanate	antimicrobial	4	antimicrobial	CN=C=S
557-34-6		antimicrobial	4	antimicrobial
592-01-8		antimicrobial	4	antimicrobial
614-87-9	Dibromopropamidine isethionate	antimicrobial	4	antimicrobial	NC(=N)C1=CC(Br)=C(OCCCOC2=C(Br)C=C(C=C2)C(N)=N)C=C1
643-79-8	1,2-Benzenedicarboxaldehyde	antimicrobial	4	antimicrobial	O=CC1=CC=CC=C1C=O
650-51-1	Sodium trichloroacetate	antimicrobial	4	antimicrobial	OC(=O)C(Cl)(Cl)Cl
870-72-4	Sodium hydroxymethanesulfonate	reducer|antimicrobial	4	antimicrobial	OCS(O)(=O)=O
999-81-5	Chlormequat chloride	antimicrobial	4	antimicrobial	C[N+](C)(C)CCCl
1070-03-7	2-Ethylhexyl dihydrogen phosphate	antimicrobial	4	antimicrobial	CCCCC(CC)COP(O)(O)=O
1111-67-7	Copper thiocyanate	antimicrobial	4	antimicrobial	SC#N
1135-24-6	Ferulic acid	flavorant|antimicrobial	4	antimicrobial
1184-64-1	Copper(II) carbonate	antimicrobial	4	antimicrobial	OC(O)=O
1192-52-5	4,5-Dichloro-3H-1,2-dithiol-3-one	antimicrobial	4	antimicrobial	ClC1=C(Cl)C(=O)SS1
1300-35-2		odor eliminator|astringent|antimicrobial	4	antimicrobial
1300-51-2	Monosodium phenolsulfonate	odor eliminator|antimicrobial	4	antimicrobial
1303-28-2		antimicrobial	4	antimicrobial
1310-53-8		antimicrobial	4	antimicrobial
1317-25-5		astringent|antimicrobial	4	antimicrobial
1317-39-1		antimicrobial	4	antimicrobial
1321-23-9		preservative|odor eliminator|antimicrobial	4	antimicrobial
1322-14-1		viscosity controlling agent|preservative|antimicrobial	4	antimicrobial
1327-53-3		antimicrobial	4	antimicrobial
1330-85-4	Dodecylbenzyl trimethyl ammonium chloride	antimicrobial	4	antimicrobial
1332-65-6		antimicrobial	4	antimicrobial
1338-02-9		antimicrobial	4	antimicrobial
1340-06-3		surfactant|antimicrobial|antidandruff	4	antimicrobial
1341-08-8	1-[2-Oxo-2-[[2-[(1-oxooctadecyl)oxy]ethyl]amino]ethyl]pyridinium chloride	antistatic agent|antimicrobial	4	antimicrobial	CCCCCCCCCCCCCCCCCC(=O)OCCNC(=O)C[n+]1ccccc1
1399-80-0		antimicrobial	4	antimicrobial
1414-45-5		antimicrobial	4	antimicrobial
1610-18-0	Prometon	antimicrobial	4	antimicrobial	COC1=NC(NC(C)C)=NC(NC(C)C)=N1
1777-82-8	2,4-Dichlorobenzyl alcohol	preservative|antimicrobial	4	antimicrobial	OCC1=C(Cl)C=C(Cl)C=C1
1854-23-5	4,4'-(2-Ethyl-2-nitrotrimethylene)dimorpholine	antimicrobial	4	antimicrobial	CCC(CN1CCOCC1)(CN1CCOCC1)[N+]([O-])=O
1897-45-6	Chlorothalonil	antimicrobial	4	antimicrobial	ClC1=C(Cl)C(C#N)=C(Cl)C(C#N)=C1Cl
2008-39-1	2,4-D, Dimethylamine salt	antimicrobial	4	antimicrobial	OC(=O)COC1=C(Cl)C=C(Cl)C=C1
2058-46-0	Oxytetracycline hydrochloride	antimicrobial	4	antimicrobial	CN(C)C1C2C(O)C3C(C(=O)c4c(O)cccc4C3(C)O)C(=O)C2(O)C(=O)C(C(N)=O)C1=O
2155-70-6		antimicrobial	4	antimicrobial
2224-44-4	4-(2-Nitrobutyl)morpholine	antimicrobial	4	antimicrobial	CCC(CN1CCOCC1)[N+]([O-])=O
2228-95-7	PUBCHEM_57375910	antimicrobial	4	antimicrobial
2244-21-5	Potassium dichloroisocyanurate	antimicrobial	4	antimicrobial	ClN1C(=O)NC(=O)N(Cl)C1=O
2253-73-8	Isopropyl isothiocyanate	biocide|antimicrobial	4	antimicrobial	CC(C)N=C=S
2398-96-1	Tolnaftate	antimicrobial	4	antimicrobial	CN(C(=S)OC1=CC2=CC=CC=C2C=C1)C1=CC=CC(C)=C1
2439-10-3	Dodine	antimicrobial	4	antimicrobial	CCCCCCCCCCCCNC(N)=N
2478-29-7		hair conditioner|antistatic agent|antimicrobial	4	antimicrobial
2491-38-5	2-Bromo-4-hydroxyacetophenone	antimicrobial	4	antimicrobial	OC1=CC=C(C=C1)C(=O)CBr
2492-26-4	Sodium 2-mercaptobenzothiolate	antimicrobial	4	antimicrobial	SC1=NC2=C(S1)C=CC=C2
2527-58-4	Benzamide, 2,2'-dithiobis[N-methyl-	antimicrobial	4	antimicrobial	CNC(=O)C1=C(SSC2=C(C=CC=C2)C(=O)NC)C=CC=C1
2665-13-6	2,2'-(1-Methyltrimethylenedioxy)bis(4-methyl-1,3,2-dioxaborinane)	antimicrobial	4	antimicrobial	CC(CCOB1OCCC(C)O1)OB1OCCC(C)O1
2675-77-6	Chloroneb	antimicrobial	4	antimicrobial	COC1=CC(Cl)=C(OC)C=C1Cl
2682-20-4	2-Methyl-3(2H)-isothiazolone	preservative|colorant|biocide|antioxidant|antimicrobial	4	antimicrobial	CN1SC=CC1=O
2699-79-8		antimicrobial	4	antimicrobial
2782-57-2	Troclosene	antimicrobial	4	antimicrobial	ClN1C(=O)NC(=O)N(Cl)C1=O
2893-78-9	Sodium dichloroisocyanurate	antimicrobial	4	antimicrobial	ClN1C(=O)NC(=O)N(Cl)C1=O
3064-70-8	Bis(trichloromethyl)sulfone	antimicrobial	4	antimicrobial	ClC(Cl)(Cl)S(=O)(=O)C(Cl)(Cl)Cl
3184-65-4	Sodium 2-benzyl-4-chlorophenate	antimicrobial	4	antimicrobial	OC1=C(CC2=CC=CC=C2)C=C(Cl)C=C1
3380-30-1	Soneclosan	antimicrobial	4	antimicrobial	OC1=C(OC2=CC=C(Cl)C=C2)C=CC(Cl)=C1
3567-25-7	Sulcofuron-sodium	antimicrobial	4	antimicrobial	OS(=O)(=O)C1=CC(Cl)=CC=C1OC1=C(NC(=O)NC2=CC(Cl)=C(Cl)C=C2)C=C(Cl)C=C1
3586-55-8	1,2-Bis[hydroxymethoxy]ethane	antimicrobial	4	antimicrobial	OCOCCOCO
3696-28-4	Dipyrithione	antimicrobial	4	antimicrobial	[O-][N+]1=C(SSC2=[N+]([O-])C=CC=C2)C=CC=C1
3697-42-5	Chlorhexidine dihydrochloride	preservative|oral care|antimicrobial	4	antimicrobial	ClC1=CC=C(NC(=N)NC(=N)NCCCCCCNC(=N)NC(=N)NC2=CC=C(Cl)C=C2)C=C1
4027-18-3		antimicrobial	4	antimicrobial
4028-98-2	Dequalinium acetate	odor eliminator|antimicrobial	4	antimicrobial	CC1=CC(N)=C2C=CC=CC2=[N+]1CCCCCCCCCC[N+]1=C2C=CC=CC2=C(N)C=C1C
4080-31-3	N-(3-Chloroallyl)hexaminium chloride	preservative|colorant|antimicrobial	4	antimicrobial	Cl\C=C/C[N+]12CN3CN(CN(C3)C1)C2
4253-89-8	Isopropyl disulfide	flavorant|biocide|antimicrobial	4	antimicrobial	CC(C)SSC(C)C
4299-07-4	1,2-Benzisothiazol-3(2H)-one, 2-butyl-	antimicrobial	4	antimicrobial	CCCCN1SC2=C(C=CC=C2)C1=O
4342-36-3		antimicrobial	4	antimicrobial
4776-06-1	Fluorosalan	antimicrobial	4	antimicrobial	OC1=C(C=C(Br)C=C1Br)C(=O)NC1=CC(=CC=C1)C(F)(F)F
5395-50-6	Imidazo[4,5-d]imidazole-2,5(1H,3H)-dione, tetrahydro-1,3,4,6-tetrakis(hydroxymethyl)-	antimicrobial	4	antimicrobial	OCN1C2C(N(CO)C1=O)N(CO)C(=O)N2CO
5538-94-3	Dioctyldimethylammonium chloride	antimicrobial	4	antimicrobial	CCCCCCCC[N+](C)(C)CCCCCCCC
5579-81-7		astringent|antimicrobial	4	antimicrobial
5915-41-3	Terbuthylazine	antimicrobial	4	antimicrobial	CCNC1=NC(NC(C)(C)C)=NC(Cl)=N1
5950-12-9		skin conditioner|antioxidant|antimicrobial	4	antimicrobial
6272-74-8	Lapyrium chloride	antistatic agent|antimicrobial	4	antimicrobial	CCCCCCCCCCCC(=O)OCCNC(=O)C[N+]1=CC=CC=C1
6317-18-6	Methylene bis(thiocyanate)	antimicrobial	4	antimicrobial	N#CSCSC#N
6440-58-0	1,3-Dimethylol-5,5-dimethylhydantoin	preservative|fragrance|antimicrobial	4	antimicrobial	CC1(C)N(CO)C(=O)N(CO)C1=O
6921-17-1	1-Chloro-5,5-dimethylhydantoin	antimicrobial	4	antimicrobial	CC1(C)C(Cl)C(=O)NC1=O
7091-57-8	8-Hydroxyquinoline benzoate	antimicrobial	4	antimicrobial	OC1=CC=CC2=CC=CN=C12
7097-60-1		antimicrobial	4	antimicrobial
7166-19-0	beta-Bromo-beta-nitrostyrene	antimicrobial	4	antimicrobial
7446-09-5		fragrance|antimicrobial	4	antimicrobial
7446-19-7		oral care|astringent|antiplaque agent|antimicrobial	4	antimicrobial
7553-56-2		antimicrobial	4	antimicrobial
7647-15-6		antimicrobial	4	antimicrobial
7673-09-8	Trichloromelamine	antimicrobial	4	antimicrobial	ClNC1=NC(NCl)=NC(NCl)=N1
7681-11-0		stabilizer|antimicrobial	4	antimicrobial
7681-82-5		antimicrobial	4	antimicrobial
7696-12-0	Tetramethrin	antimicrobial|active ingredient	4	antimicrobial	CC(C)=CC1C(C(=O)OCN2C(=O)C3=C(CCCC3)C2=O)C1(C)C
7722-64-7		antimicrobial	4	antimicrobial
7726-95-6		antimicrobial	4	antimicrobial
7733-02-0		oral care|astringent|antiplaque agent|antimicrobial	4	antimicrobial
7738-94-5		antimicrobial	4	antimicrobial
7746-20-0		oral care|astringent|antiplaque agent|antimicrobial	4	antimicrobial
7758-99-8		water softener|antimicrobial	4	antimicrobial
7761-88-8		hair dye|antimicrobial	4	antimicrobial
7775-09-9		reaction product|oxidizer|odor eliminator|antimicrobial	4	antimicrobial
7775-41-9		antimicrobial	4	antimicrobial
7778-39-4		antimicrobial	4	antimicrobial
7778-54-3		antimicrobial	4	antimicrobial
7779-27-3	1,3,5-Triethylhexahydro-s-triazine	antimicrobial	4	antimicrobial	CCN1CN(CC)CN(CC)C1
7783-90-6		preservative|antimicrobial	4	antimicrobial
7789-12-0		antimicrobial	4	antimicrobial
7790-92-3		antimicrobial	4	antimicrobial
8001-54-5		antimicrobial	4	antimicrobial
8001-58-9		antimicrobial	4	antimicrobial
8003-34-7		antimicrobial|active ingredient	4	antimicrobial
8007-45-2		antimicrobial	4	antimicrobial
8029-68-3		antimicrobial	4	antimicrobial
8045-21-4		antimicrobial	4	antimicrobial
8054-40-8		antimicrobial	4	antimicrobial
8057-51-0		skin conditioner|antimicrobial	4	antimicrobial
9007-39-0		antimicrobial	4	antimicrobial
10045-89-3		antimicrobial	4	antimicrobial
10049-04-4		antimicrobial	4	antimicrobial
10058-23-8		antimicrobial	4	antimicrobial
10222-01-2	2,2-Dibromo-3-nitrilopropionamide	antimicrobial	4	antimicrobial	NC(=O)C(Br)(Br)C#N
10294-26-5		antimicrobial	4	antimicrobial
10332-33-9		antimicrobial	4	antimicrobial
10380-28-6		antimicrobial	4	antimicrobial
10402-15-0		antimicrobial	4	antimicrobial
10453-86-8	Resmethrin	antimicrobial	4	antimicrobial	CC(C)=CC1C(C(=O)OCC2=COC(CC3=CC=CC=C3)=C2)C1(C)C
10549-76-5	Tetrabutylammonium	antistatic agent|antimicrobial	4	antimicrobial	CCCC[N+](CCCC)(CCCC)CCCC
10588-01-9		antimicrobial	4	antimicrobial
10605-21-7	Carbendazim	antimicrobial	4	antimicrobial	COC(=O)NC1=NC2=CC=CC=C2N1
11096-42-7		antimicrobial	4	antimicrobial
12001-85-3		antimicrobial	4	antimicrobial
12008-41-2		antimicrobial	4	antimicrobial
12027-06-4		antimicrobial	4	antimicrobial
12057-74-8		antimicrobial	4	antimicrobial
12069-69-1		antimicrobial	4	antimicrobial
12179-04-3		antimicrobial	4	antimicrobial
12276-01-6	EDTA, copper salt	antimicrobial	4	antimicrobial	OC(=O)CN(CCN(CC(O)=O)CC(O)=O)CC(O)=O
12280-03-4		antimicrobial	4	antimicrobial
12298-68-9		antimicrobial	4	antimicrobial
12447-61-9		antimicrobial	4	antimicrobial
13684-63-4	Phenmedipham	antimicrobial	4	antimicrobial	COC(=O)NC1=CC(OC(=O)NC2=CC=CC(C)=C2)=CC=C1
13707-65-8	Potassium biphenyl-2-olate	preservative|antimicrobial	4	antimicrobial	OC1=C(C=CC=C1)C1=CC=CC=C1
13840-33-0		antimicrobial	4	antimicrobial
13863-41-7		antimicrobial	4	antimicrobial
14215-52-2		antimicrobial	4	antimicrobial
14492-68-3	1-[2-Oxo-2-[[2-[(1-oxooctadecyl)oxy]ethyl]amino]ethyl]pyridinium chloride	antistatic agent|antimicrobial	4	antimicrobial	CCCCCCCCCCCCCCCCCC(=O)OCCNC(=O)C[n+]1ccccc1
14697-50-8	2,2'-Oxybis(4,4,6-trimethyl-1,3,2-dioxaborinane)	antimicrobial	4	antimicrobial	CC1CC(C)(C)OB(OB2OC(C)CC(C)(C)O2)O1
14915-37-8		biocide|antimicrobial	4	antimicrobial
15435-29-7	Bromochlorophene	preservative|odor eliminator|antimicrobial	4	antimicrobial	OC1=C(Br)C=C(Cl)C=C1CC1=CC(Cl)=CC(Br)=C1O
15510-55-1		antimicrobial	4	antimicrobial
15534-95-9	2-Imidazolidinethione, 1,3-bis(hydroxymethyl)-	hair conditioner|antimicrobial	4	antimicrobial	OCN1CCN(CO)C1=S
15733-22-9	Sodium 4-chloro-3-methylphenolate	antimicrobial	4	antimicrobial	CC1=C(Cl)C=CC(O)=C1
15922-78-8	Sodium pyrithione	antimicrobial	4	antimicrobial	ON1C=CC=CC1=S
16079-88-2	Bromo-3-chloro-5,5-dimethylhydantoin	antimicrobial	4	antimicrobial	CC1(C)N(Br)C(=O)N(Cl)C1=O
16283-36-6		antimicrobial	4	antimicrobial
17015-60-0	PUBCHEM_45358110	antimicrobial	4	antimicrobial
17387-01-8	Sodium hinokitiol	fragrance|antimicrobial	4	antimicrobial	CC(C)C1=CC=CC(=O)C(=O)C1
17670-95-0	Bis-caprylylaminoethyl glycine	antimicrobial	4	antimicrobial	CCCCCCCCNCCN(CCNCCCCCCCC)CC(O)=O
18205-85-1	Dodicin hydrochloride [ISO]	antimicrobial	4	antimicrobial	CCCCCCCCCCCCNCCNCCNCC(O)=O
18472-51-0		preservative|oral care|antimicrobial	4	antimicrobial
19379-90-9	Dodecyl bis(2-hydroxyethyl) benzyl ammonium chloride	antimicrobial	4	antimicrobial	CCCCCCCCCCCC[N+](CCO)(CCO)CC1=CC=CC=C1
19683-98-8		antimicrobial|antidandruff	4	antimicrobial
19807-11-5		antimicrobial	4	antimicrobial
20427-59-2		antimicrobial	4	antimicrobial
20667-12-3		antimicrobial	4	antimicrobial
20679-58-7	1,4-Bis(bromoacetoxy)-2-butene	antimicrobial	4	antimicrobial
20859-73-8		antimicrobial	4	antimicrobial
21564-17-0	2-(Thiocyanomethylthio)benzothiazole	antimicrobial	4	antimicrobial	N#CSCSC1=NC2=CC=CC=C2S1
22832-87-7		antimicrobial	4	antimicrobial
23593-75-1	Clotrimazole	antimicrobial|antidandruff	4	antimicrobial	ClC1=C(C=CC=C1)C(N1C=CN=C1)(C1=CC=CC=C1)C1=CC=CC=C1
25155-18-4		surfactant|odor eliminator|antistatic agent|antimicrobial	4	antimicrobial
25254-50-6	Hexahydro-1,3,5-tris(2-hydroxypropyl)-s-triazine	antimicrobial	4	antimicrobial	CC(O)CN1CN(CC(C)O)CN(CC(C)O)C1
25655-41-8		antimicrobial	4	antimicrobial
26002-80-2	Phenothrin	antimicrobial	4	antimicrobial	CC(C)=CC1C(C(=O)OCC2=CC=CC(OC3=CC=CC=C3)=C2)C1(C)C
26172-55-4	5-Chloro-2-methyl-3(2H)-isothiazolone	preservative|fragrance|colorant|antioxidant|antimicrobial	4	antimicrobial	CN1SC(Cl)=CC1=O
26530-20-1	Octhilinone	antimicrobial	4	antimicrobial	CCCCCCCCN1SC=CC1=O
26617-87-8		antimicrobial	4	antimicrobial
27668-52-6	N,N-Dimethyl-N-(3-(trimethoxysilyl)propyl) octadecan-1-aminium chloride	wetting agent|antimicrobial	4	antimicrobial	CCCCCCCCCCCCCCCCCC[N+](C)(C)CCC[Si](OC)(OC)OC
28159-98-0	Cybutryne	antimicrobial	4	antimicrobial	CSC1=NC(NC(C)(C)C)=NC(NC2CC2)=N1
28349-72-6		antimicrobial	4	antimicrobial
30388-01-3	2-Hydroxypropyl methanethiosulfonate	antimicrobial	4	antimicrobial	CC(O)CSS(C)(=O)=O
30525-89-4		antimicrobial	4	antimicrobial
30581-95-4		odor eliminator|antimicrobial	4	antimicrobial
30968-43-5	2-Heptadecenyl-2-imidazoline	antimicrobial	4	antimicrobial
31366-95-7	Sodium 4-(2-methylbutan-2-yl)phenolate	antimicrobial	4	antimicrobial	CCC(C)(C)C1=CC=C(O)C=C1
31512-74-0	Polixetonium chloride	antimicrobial	4	antimicrobial
32181-59-2		skin conditioner|bleach|antimicrobial	4	antimicrobial
32289-58-0	Polihexanide	preservative|antimicrobial	4	antimicrobial
32351-70-5	Mecoprop-dimethylammonium	antimicrobial	4	antimicrobial	CC(OC1=C(C)C=C(Cl)C=C1)C(O)=O
32426-11-2	Octyl decyl dimethyl ammonium chloride	surfactant|antistatic agent|antimicrobial	4	antimicrobial	CCCCCCCCCC[N+](C)(C)CCCCCCCC
33079-08-2	Pyrithione tert-butylamine	antimicrobial	4	antimicrobial	ON1C=CC=CC1=S
33113-08-5	Copper ammonium carbonate	antimicrobial	4	antimicrobial	OC(O)=O
33940-98-6		emulsifier|biocide|antimicrobial	4	antimicrobial
34375-28-5	2-(Hydroxymethylamino)ethanol	antimicrobial	4	antimicrobial	CN(O)CCO
34769-44-3		antiseborrheic|antimicrobial	4	antimicrobial
35471-49-9	Potassium 2-benzyl-4-chlorophenate	antimicrobial	4	antimicrobial	OC1=C(CC2=CC=CC=C2)C=C(Cl)C=C1
35691-65-7	1,2-Dibromo-2,4-dicyanobutane	antimicrobial	4	antimicrobial	BrCC(Br)(CCC#N)C#N
36362-09-1	2-(Decylthio)ethanamine hydrochloride	antimicrobial	4	antimicrobial	CCCCCCCCCCSCCN
36701-38-9		odor eliminator|antimicrobial	4	antimicrobial
36895-38-2		antimicrobial	4	antimicrobial
37335-68-5	Alkyl* dimethyl ethylbenzyl ammonium cyclohexylsulfamate *(50%C12, 30%C14, 17%C16, 3%C18)	antimicrobial	4	antimicrobial
38083-17-9	Climbazole	preservative|antimicrobial	4	antimicrobial	CC(C)(C)C(=O)C(OC1=CC=C(Cl)C=C1)N1C=CN=C1
39012-86-7		antiseborrheic|antimicrobial	4	antimicrobial
41591-87-1	1-Tetradecanaminium, N,N-dimethyl-N-[3-(trimethoxysilyl)propyl]-, chloride	antimicrobial	4	antimicrobial	CCCCCCCCCCCCCC[N+](C)(C)CCC[Si](OC)(OC)OC
41621-49-2	Ciclopirox olamine	antimicrobial|antidandruff	4	antimicrobial	CC1=CC(=O)N(O)C(=C1)C1CCCCC1
44987-75-9		antimicrobial	4	antimicrobial
51229-78-8	Chloroallyl methenamine chloride	preservative|antimicrobial	4	antimicrobial	Cl\C=C/C[N+]12CN3CN(CN(C3)C1)C2
51580-86-0	Sodium dichloro-s-triazinetrione dihydrate	antimicrobial	4	antimicrobial	ClN1C(=O)NC(=O)N(Cl)C1=O
52645-53-1	Permethrin	flame retardant|antimicrobial|active ingredient	4	antimicrobial	CC1(C)C(C=C(Cl)Cl)C1C(=O)OCC1=CC(OC2=CC=CC=C2)=CC=C1
53404-18-5	Potassium 4-(2-methylbutan-2-yl)phenolate	antimicrobial	4	antimicrobial	CCC(C)(C)C1=CC=C(O)C=C1
53516-75-9	BTC 1100	antimicrobial	4	antimicrobial	CCCCCCCCCCCC[N+](C)(C)Cc1cccc2ccccc12
53516-76-0		antimicrobial	4	antimicrobial
55468-88-7	2-Phenoxyethyl p-hydroxybenzoate	antimicrobial	4	antimicrobial	OC1=CC=C(C=C1)C(=O)OCCOC1=CC=CC=C1
55566-30-8		antimicrobial	4	antimicrobial
59720-42-2	5-Hydroxymethoxymethyl-1-aza-3,7-dioxabicyclo(3.3.0)octane	antimicrobial	4	antimicrobial	OCOCC12COCN1COC2
60628-96-8	Bifonazole	antimicrobial|antidandruff	4	antimicrobial	C1=CN(C=N1)C(C1=CC=CC=C1)C1=CC=C(C=C1)C1=CC=CC=C1
61789-18-2		surfactant|preservative|antistatic agent|antimicrobial	4	antimicrobial
61789-28-4		antimicrobial	4	antimicrobial
61791-39-7		hair conditioner|antistatic agent|antimicrobial	4	antimicrobial
61791-63-7		antimicrobial	4	antimicrobial
61791-64-8	1-(Alkyl* amino)-3-aminopropane acetate *(as in fatty acids of coconut oil)	antimicrobial	4	antimicrobial
61886-53-1		odor eliminator|antimicrobial	4	antimicrobial
62732-91-6	Debacarb	antimicrobial	4	antimicrobial	CCOCCOCCOC(=O)NC1=NC2=C(N1)C=CC=C2
63449-41-2		surfactant|preservative|odor eliminator|antistatic agent|antimicrobial	4	antimicrobial
63968-64-9	Artemisinin	skin conditioner|antimicrobial	4	antimicrobial
66330-88-9		antimicrobial	4	antimicrobial
67564-91-4	(2R,6S)-Fenpropimorph	antimicrobial	4	antimicrobial	[H]N[C@@H](CC1=CC=CC=C1)C(=O)N[C@@H](C)C(=O)N[C@@H]([C@@H](C)CC)C(=O)N[C@@H](CC(C)C)C(O)=O
67701-09-1		antimicrobial	4	antimicrobial
68130-12-1		antimicrobial	4	antimicrobial
68155-37-3		antimicrobial	4	antimicrobial
68155-43-1	1-(Alkyl* amino)-3-aminopropane hydroxyacetate *(as in fatty acids of coconut oil)	antimicrobial	4	antimicrobial
68391-01-5		surfactant|preservative|odor eliminator|fragrance|antistatic agent|antimicrobial	4	antimicrobial
68424-85-1		surfactant|preservative|odor eliminator|biocide|antistatic agent|antimicrobial	4	antimicrobial
68439-47-4	Alcohols, C11-15, ethoxylated, compounds with iodine	antimicrobial	4	antimicrobial
68443-05-0	Sulfonated oleic acid, sodium salt	antimicrobial	4	antimicrobial
68527-84-4	Tetradecyl dimethyl ethyl ammonium bromide	antimicrobial	4	antimicrobial	CCCCCCCCCCCCCC[N+](C)(C)CC
68602-80-2		antimicrobial	4	antimicrobial
68607-28-3		antimicrobial	4	antimicrobial
68610-00-4		antimicrobial	4	antimicrobial
68649-38-7		antimicrobial	4	antimicrobial
68956-79-6		antimicrobial	4	antimicrobial
68959-20-6	Disiquonium chloride	antimicrobial	4	antimicrobial	CCCCCCCCCC[N+](C)(CCCCCCCCCC)CCC[Si](OC)(OC)OC
68989-01-5		surfactant|preservative|odor eliminator|antistatic agent|antimicrobial	4	antimicrobial
70592-80-2	C10-16-Alkyldimethylamines oxides	surfactant|antimicrobial	4	antimicrobial
70775-75-6	Octenidine hydrochloride	antimicrobial	4	antimicrobial	CCCCCCCCN=C1C=CN(CCCCCCCCCCN2C=CC(C=C2)=NCCCCCCCC)C=C1
71751-41-2		antimicrobial|active ingredient	4	antimicrobial
71786-60-2		antistatic agent|antimicrobial	4	antimicrobial
73049-75-9		antimicrobial	4	antimicrobial
76902-90-4	3,5,7-Triaza-1-azoniatricyclo(3.3.1.1(superscript3,7))decane, 1-methyl-, chloride	antistatic agent|antimicrobial	4	antimicrobial	C[N+]12CN3CN(CN(C3)C1)C2
79241-46-6	Fluazifop-P-butyl	antimicrobial	4	antimicrobial	CCCCOC(=O)C(C)OC1=CC=C(OC2=CC=C(C=N2)C(F)(F)F)C=C1
82027-59-6	Copper, ((2,2',2''-nitrilotris(ethanolato))(2-)-N,O,O',O")-	antimicrobial	4	antimicrobial	OCCN(CCO)CCO
82633-79-2	2-Methyl-5,6-dihydro-2H-cyclopenta[d][1,2]thiazol-3(4H)-one	antimicrobial	4	antimicrobial	CN1SC2=C(CCC2)C1=O
84540-50-1	5-Amino-6-chloro-o-cresol	hair dye|antimicrobial	4	antimicrobial	CC1=C(O)C(Cl)=C(N)C=C1
84625-61-6	Itraconazole	antimicrobial	4	antimicrobial	CCC(C)N1N=CN(C1=O)c1ccc(cc1)N1CCN(CC1)c1ccc(OCC2COC(Cn3cncn3)(O2)c2ccc(Cl)cc2Cl)cc1
84775-72-4		antimicrobial	4	antimicrobial
85058-43-1		antimicrobial	4	antimicrobial
85085-64-9		antimicrobial	4	antimicrobial
85085-68-3		oral care|astringent|antimicrobial	4	antimicrobial
85264-33-1	(3,5-Dimethyl-1H-pyrazol-1-yl)methanol	antimicrobial	4	antimicrobial	CC1=NN(CO)C(C)=C1
85409-22-9		surfactant|preservative|odor eliminator|antistatic agent|antimicrobial	4	antimicrobial
85409-23-0		antimicrobial	4	antimicrobial
85508-38-9		hair conditioner|antistatic agent|antimicrobial	4	antimicrobial
89415-87-2	1,3-Dichloro-5-ethyl-5-methylhydantoin	antimicrobial	4	antimicrobial	CCC1(C)N(Cl)C(=O)N(Cl)C1=O
89958-27-0		skin conditioner|antiseborrheic|antimicrobial|antidandruff	4	antimicrobial
90823-38-4	Denatonium saccharide	denaturant|antimicrobial	4	antimicrobial	CC[N+](CC)(CC(=O)NC1=C(C)C=CC=C1C)CC1=CC=CC=C1
91080-29-4		surfactant|preservative|odor eliminator|antistatic agent|antimicrobial	4	antimicrobial
91112-66-2	Bromochloro-5-ethyl-5-methylhydantoin	antimicrobial	4	antimicrobial	CCC1(C)N(Br)C(=O)N(Cl)C1=O
91125-43-8	Sodium 2-(nonanoyloxy)benzenesulfonate	antimicrobial	4	antimicrobial
91745-52-7		antimicrobial	4	antimicrobial
94167-08-5		skin conditioner|antimicrobial	4	antimicrobial
94313-91-4	Trimethyl-3-((1-oxo-10-undecenyl)amino)propylammonium methyl sulphate	hair conditioner|antistatic agent|antimicrobial	4	antimicrobial	C[N+](C)(C)CCCNC(=O)CCCCCCCCC=C
94361-06-5	Cyproconazole	antimicrobial	4	antimicrobial	CC(C1CC1)C(O)(CN1C=NC=N1)C1=CC=C(Cl)C=C1
96118-96-6		antimicrobial	4	antimicrobial
97553-90-7	Methanol, (((1-methyl-2-(5-methyl-3-oxazolidinyl)ethoxy)methoxy)methoxy)-	antimicrobial	4	antimicrobial	CC(CN1COC(C)C1)OCOCOCO
98524-54-0		antimicrobial	4	antimicrobial
99685-96-8	Fullerene C60	skin conditioner|antimicrobial	4	antimicrobial	C12=C3C4=C5C1=C1C6=C7C2=C2C8=C3C3=C9C4=C4C%10=C5C5=C1C1=C%11C%12=C5C%10=C5C%10=C4C9=C4C9=C3C8=C3C8=C2C7=C2C(=C61)C1=C6C2=C8C2=C7C6=C6C(=C%111)C%12=C5C1=C%10C4=C(C9=C32)C7=C61
105883-46-3	PUBCHEM_57346500	antimicrobial	4	antimicrobial
107534-93-0	Macelignan	oral care|odor eliminator|antioxidant|antimicrobial	4	antimicrobial	COc1cc(CC(C)C(C)Cc2ccc3OCOc3c2)ccc1O
107534-96-3	Tebuconazole	antimicrobial	4	antimicrobial	CC(C)(C)C(O)(CCC1=CC=C(Cl)C=C1)CN1C=NC=N1
119515-38-7	Icaridin	antimicrobial	4	antimicrobial	CCC(C)OC(=O)N1CCCCC1CCO
120579-32-0		antimicrobial	4	antimicrobial
122454-29-9	Tralopyril	biocide|antimicrobial	4	antimicrobial	FC(F)(F)C1=C(Br)C(C#N)=C(N1)C1=CC=C(Cl)C=C1
130328-18-6		antimicrobial	4	antimicrobial
138261-41-3	Imidacloprid	antimicrobial	4	antimicrobial	[O-][N+](=O)\N=C1/NCCN1CC1=CN=C(Cl)C=C1
138698-36-9	Decyl isononyl dimethyl ammonium chloride	antimicrobial	4	antimicrobial
148788-55-0		antimicrobial	4	antimicrobial
153719-23-4	Thiamethoxam	antimicrobial	4	antimicrobial	CN1COCN(Cc2cnc(Cl)s2)\C1=N\[N+]([O-])=O
155645-89-9		antimicrobial	4	antimicrobial
199111-50-7	1-Octadecanaminium, N,N-dimethyl-N-[3-(trihydroxysilyl)propyl] chloride	antimicrobial	4	antimicrobial	CCCCCCCCCCCCCCCCCC[N+](C)(C)CCC[Si](O)(O)O
199277-63-9		skin conditioner|antimicrobial	4	antimicrobial
214710-34-6		antimicrobial	4	antimicrobial
312600-89-8		antimicrobial	4	antimicrobial
374572-91-5		antimicrobial	4	antimicrobial
557091-14-2		antimicrobial	4	antimicrobial
720697-37-0		oxidizer|antimicrobial	4	antimicrobial
736150-63-3		plasticizer|biocide|antimicrobial	4	antimicrobial
757245-27-5		masking agent|antimicrobial|antidandruff	4	antimicrobial
865661-00-3		skin conditioner|bleach|antioxidant|antimicrobial	4	antimicrobial
54-12-6	dl-Tryptophan	masking agent|hair conditioner|antistatic agent	5	hair conditioner	NC(CC1=CNC2=CC=CC=C12)C(O)=O
56-40-6	Glycine	skin conditioner|processing aid|hair conditioner|flavorant|buffer|antistatic agent|additive	5	hair conditioner	NCC(O)=O
56-41-7		skin conditioner|masking agent|hair conditioner|flavorant|antistatic agent	5	hair conditioner
56-45-1		skin conditioner|masking agent|hair conditioner|antistatic agent	5	hair conditioner
56-84-8	L-Aspartic acid	skin conditioner|masking agent|hair conditioner|flavorant|antistatic agent	5	hair conditioner	NC(CC(O)=O)C(O)=O
56-85-9	L-Glutamine	skin conditioner|hair conditioner|flavorant|antistatic agent	5	hair conditioner	NC(CCC(N)=O)C(O)=O
56-87-1	Lysine	skin conditioner|hair conditioner|flavorant|antistatic agent	5	hair conditioner	NCCCCC(N)C(O)=O
56-89-3	L-Cystine	masking agent|hair conditioner|flavorant|antistatic agent	5	hair conditioner	NC(CSSCC(N)C(O)=O)C(O)=O
58-56-0	Pyridoxine hydrochloride	skin conditioner|hair conditioner|antistatic agent	5	hair conditioner	CC1=C(O)C(CO)=C(CO)C=N1
58-85-5	Biotin	skin conditioner|hair conditioner|antiseborrheic	5	hair conditioner	OC(=O)CCCCC1SCC2NC(=O)NC12
59-51-8	dl-Methionine	stabilizer|skin conditioner|hair conditioner|flavorant|enzyme|antistatic agent	5	hair conditioner	CSCCC(N)C(O)=O
60-18-4	L-Tyrosine	skin conditioner|masking agent|hair conditioner|flavorant|antistatic agent	5	hair conditioner	NC(Cc1ccc(O)cc1)C(O)=O
61-90-5	Leucine	skin conditioner|hair conditioner|flavorant|antistatic agent	5	hair conditioner	CC(C)CC(N)C(O)=O
65-23-6	Pyridoxine	skin conditioner|hair conditioner|antistatic agent	5	hair conditioner	CC1=C(O)C(CO)=C(CO)C=N1
66-84-2	Glucosamine hydrochloride	hair conditioner|antistatic agent	5	hair conditioner	NC1C(O)OC(CO)C(O)C1O
70-47-3		skin conditioner|masking agent|hair conditioner|antistatic agent	5	hair conditioner
72-18-4		skin conditioner|masking agent|hair conditioner|flavorant|antistatic agent	5	hair conditioner
72-19-5	L-Threonine	hair waving straightener|hair conditioner|antistatic agent	5	hair conditioner	CC(O)C(N)C(O)=O
73-22-3	l-Tryptophan	masking agent|hair conditioner|antistatic agent	5	hair conditioner	NC(CC1=CNC2=CC=CC=C12)C(O)=O
73-32-5	L-Isoleucine	skin conditioner|hair conditioner|antistatic agent	5	hair conditioner	CCC(C)C(N)C(O)=O
74-79-3	L-Arginine	skin conditioner|masking agent|hair conditioner|flavorant|antistatic agent	5	hair conditioner	NC(CCCNC(N)=N)C(O)=O
79-83-4	Pantothenic acid	skin conditioner|hair conditioner|antistatic agent	5	hair conditioner	CC(C)(CO)C(O)C(=O)NCCC(O)=O
80-68-2		hair waving straightener|hair conditioner|flavorant|antistatic agent	5	hair conditioner
81-13-0	Dexpanthenol	skin conditioner|hair conditioner|antistatic agent	5	hair conditioner	CC(C)(CO)C(O)C(=O)NCCCO
87-73-0		hair conditioner	5	hair conditioner
95-19-2	2-Heptadecyl-3-hydroxyethylimidazoline	hair conditioner|antistatic agent	5	hair conditioner	CCCCCCCCCCCCCCCCCC1=NCCN1CCO
102-29-4	Resorcinol monoacetate	skin conditioner|hair conditioner|antistatic agent	5	hair conditioner	CC(=O)OC1=CC=CC(O)=C1
107-64-2	Dimethyldioctadecylammonium chloride	hair conditioner|antistatic agent	5	hair conditioner	CCCCCCCCCCCCCCCCCC[N+](C)(C)CCCCCCCCCCCCCCCCCC
111-01-3	Squalane	skin conditioner|refatting agent|hair conditioner|emollient	5	hair conditioner	CC(C)CCCC(C)CCCC(C)CCCCC(C)CCCC(C)CCCC(C)C
111-02-4	trans-Squalene	skin conditioner|refatting agent|hair conditioner|emollient|antistatic agent	5	hair conditioner	CC(C)=CCC\C(C)=C\CC\C(C)=C\CC\C=C(/C)CC\C=C(/C)CCC=C(C)C
112-00-5	Dodecyltrimethylammonium chloride	preservative|emulsifier|antistatic agent	5	hair conditioner	CCCCCCCCCCCC[N+](C)(C)C
112-03-8	N,N,N-Trimethyloctadecan-1-aminium chloride	preservative|hair conditioner|antistatic agent	5	hair conditioner	CCCCCCCCCCCCCCCCCC[N+](C)(C)C
112-18-5	N,N-Dimethyldodecan-1-amine	hair conditioner|fragrance|antistatic agent	5	hair conditioner	CCCCCCCCCCCCN(C)C
112-75-4	N,N-Dimethyltetradecylamine	hair conditioner|fragrance|antistatic agent	5	hair conditioner	CCCCCCCCCCCCCCN(C)C
136-99-2	1H-Imidazole-1-ethanol, 4,5-dihydro-2-undecyl-	hair conditioner|antistatic agent	5	hair conditioner	CCCCCCCCCCCC1=NCCN1CCO
137-08-6		hair conditioner|antistatic agent	5	hair conditioner
139-07-1	Benzyldimethyldodecylammonium chloride	preservative|antistatic agent	5	hair conditioner	CCCCCCCCCCCC[N+](C)(C)CC1=CC=CC=C1
147-24-0	Diphenhydramine hydrochloride	skin conditioner|hair conditioner	5	hair conditioner	CN(C)CCOC(C1=CC=CC=C1)C1=CC=CC=C1
147-85-3	L-Proline	skin conditioner|hair conditioner|flavorant	5	hair conditioner	OC(=O)C1CCCN1
293-51-6		solvent|skin conditioner|hair conditioner|emollient	5	hair conditioner
302-72-7	DL-alanine	skin conditioner|masking agent|hair conditioner|flavorant|antistatic agent	5	hair conditioner	CC(N)C(O)=O
302-84-1		skin conditioner|masking agent|hair conditioner|flavorant|antistatic agent	5	hair conditioner
334-50-9	1,4-Butanediamine, N-(3-aminopropyl)-, trihydrochloride	hair conditioner	5	hair conditioner	NCCCCNCCCN
429-67-4	Cyclotetrasiloxane, 2,4,6,8-tetramethyl-2,4,6,8-tetrakis(3,3,3-trifluoropropyl)-	skin conditioner|hair conditioner	5	hair conditioner	C[Si]1(CCC(F)(F)F)O[Si](C)(CCC(F)(F)F)O[Si](C)(CCC(F)(F)F)O[Si](C)(CCC(F)(F)F)O1
443-79-8	DL-Isoleucine	skin conditioner|hair conditioner|flavorant|antistatic agent	5	hair conditioner	CCC(C)C(N)C(O)=O
495-69-2	Hippuric acid	hair conditioner	5	hair conditioner	OC(=O)CNC(=O)C1=CC=CC=C1
499-44-5	beta-Thujaplicin	hair conditioner|fragrance|antistatic agent	5	hair conditioner	CC(C)C1=CC=CC(=O)C(=O)C1
516-06-3		skin conditioner|masking agent|hair conditioner|flavorant|antistatic agent	5	hair conditioner
540-72-7	Sodium thiocyanate	hair conditioner	5	hair conditioner	SC#N
541-05-9	Hexamethylcyclotrisiloxane	solvent|skin conditioner|hair conditioner|fragrance|emollient	5	hair conditioner	C[Si]1(C)O[Si](C)(C)O[Si](C)(C)O1
554-62-1	Phytosphingosine	skin conditioner|hair conditioner	5	hair conditioner	CCCCCCCCCCCCCCC(O)C(O)C(N)CO
556-02-5		skin conditioner|masking agent|hair conditioner|antistatic agent	5	hair conditioner
556-03-6		skin conditioner|masking agent|hair conditioner|antistatic agent	5	hair conditioner
556-50-3		skin conditioner|hair conditioner	5	hair conditioner
567-75-9	Leptospermone	skin conditioner|hair conditioner	5	hair conditioner	CC(C)CC(=O)C1C(=O)C(C)(C)C(=O)C(C)(C)C1=O
590-28-3	Potassium cyanate	skin conditioner|hair conditioner|emollient	5	hair conditioner	N=C=O
609-36-9	Proline	skin conditioner|hair conditioner	5	hair conditioner	OC(=O)C1CCCN1
617-45-8		skin conditioner|masking agent|hair conditioner|antistatic agent	5	hair conditioner
635-38-1	Pyridoxine dipalmitate	skin conditioner|hair conditioner|antistatic agent	5	hair conditioner	CCCCCCCCCCCCCCCC(=O)OC1=CN=C(C)C(O)=C1OC(=O)CCCCCCCCCCCCCCC
640-68-6	D-Valine	skin conditioner|masking agent|hair conditioner|antistatic agent	5	hair conditioner	CC(C)C(N)C(O)=O
667-83-4		hair conditioner|antistatic agent	5	hair conditioner
764-22-7		skin conditioner|hair conditioner	5	hair conditioner
867-81-2	Sodium pantothenate	hair conditioner	5	hair conditioner	CC(C)(CO)C(O)C(=O)NCCC(O)=O
959-55-7	Benzyldimethyloctylammonium chloride	hair conditioner	5	hair conditioner	CCCCCCCC[N+](C)(C)CC1=CC=CC=C1
1115-22-6		hair conditioner|antistatic agent	5	hair conditioner
1119-33-1		skin conditioner|hair conditioner|antistatic agent	5	hair conditioner
1119-94-4	Dodecyltrimethylammonium bromide	preservative|hair conditioner|antistatic agent	5	hair conditioner	CCCCCCCCCCCC[N+](C)(C)C
1120-02-1		preservative|hair conditioner|antistatic agent	5	hair conditioner
1214-39-7	N-Benzyladenine	hair conditioner	5	hair conditioner	C(NC1=C2N=CN=C2N=CN1)C1=CC=CC=C1
1541-67-9	Lauryldiethanolamine	hair conditioner	5	hair conditioner	CCCCCCCCCCCCN(CCO)CCO
2116-84-9	1,1,1,5,5,5-Hexamethyl-3-phenyl-3-(trimethylsilyloxy)trisiloxane	skin conditioner|hair conditioner|antifoaming agent	5	hair conditioner	C[Si](C)(C)O[Si](O[Si](C)(C)C)(O[Si](C)(C)C)C1=CC=CC=C1
2271-92-3	Hydroxyethyl laurdimonium chloride	hair conditioner|antistatic agent	5	hair conditioner	CCCCCCCCCCCC[N+](C)(C)CCO
2441-41-0	N-Palmitoylglycine	hair conditioner|cleaner	5	hair conditioner	CCCCCCCCCCCCCCCC(=O)NCC(O)=O
2445-53-6	Silanetriol	hair conditioner	5	hair conditioner	C[Si](O)(O)O
2545-87-1		skin conditioner|hair conditioner	5	hair conditioner
2870-63-5		hair conditioner|antistatic agent	5	hair conditioner
3006-10-8		hair conditioner|antistatic agent	5	hair conditioner
3130-87-8		skin conditioner|masking agent|hair conditioner|antistatic agent	5	hair conditioner
3416-24-8	Glucosamine	hair conditioner|antistatic agent	5	hair conditioner	NC1C(O)OC(CO)C(O)C1O
3417-91-2		hair conditioner	5	hair conditioner
4117-31-1	Ethyl serinate	skin conditioner|hair conditioner|antistatic agent	5	hair conditioner	CCOC(=O)C(N)CO
4320-30-3	L-Arginine glutamate	skin conditioner|hair conditioner	5	hair conditioner	NC(CCCNC(N)=N)C(O)=O
4372-46-7	Pyridoxine tripalmitate	skin conditioner|hair conditioner|antistatic agent	5	hair conditioner	CCCCCCCCCCCCCCCC(=O)OCC1=CN=C(C)C(OC(=O)CCCCCCCCCCCCCCC)=C1COC(=O)CCCCCCCCCCCCCCC
5009-05-2		skin conditioner|hair conditioner	5	hair conditioner
5451-09-2	Aminolevulinic acid hydrochloride	skin conditioner|hair conditioner|antimicrobial	5	hair conditioner	NCC(=O)CCC(O)=O
5934-29-2	L-Histidine hydrochloride hydrate	skin conditioner|hair conditioner	5	hair conditioner	NC(Cc1cnc[nH]1)C(O)=O
6284-40-8	Meglumine	hair conditioner	5	hair conditioner	CNCC(O)C(O)C(O)C(O)CO
6312-54-5		skin conditioner|hair conditioner|antistatic agent	5	hair conditioner
6384-92-5	N-Methyl-D-aspartic acid	skin conditioner|hair conditioner|antistatic agent	5	hair conditioner	CNC(CC(O)=O)C(O)=O
6753-62-4		skin conditioner|hair conditioner|antistatic agent	5	hair conditioner
6843-97-6	Dodicin	skin conditioner|hair conditioner|antistatic agent	5	hair conditioner	CCCCCCCCCCCCNCCNCCNCC(O)=O
6920-24-7		viscosity controlling agent|skin conditioner|hair conditioner|emollient	5	hair conditioner
6942-02-5	1H-Imidazole-1-ethanol, 4,5-dihydro-2-tridecyl-	hair conditioner|antistatic agent	5	hair conditioner	CCCCCCCCCCCCCC1=NCCN1CCO
7200-25-1	Arginine	skin conditioner|masking agent|hair conditioner|antistatic agent	5	hair conditioner	NC(CCCNC(N)=N)C(O)=O
7228-00-4	2-((3-Hydroxyphenyl)amino)acetamide	hair conditioner|antiseborrheic	5	hair conditioner	NC(=O)CNC1=CC(O)=CC=C1
7281-04-1	Benzyldodecyldimethylammonium bromide	preservative|antistatic agent	5	hair conditioner	CCCCCCCCCCCC[N+](C)(C)CC1=CC=CC=C1
7488-56-4		hair conditioner|antidandruff	5	hair conditioner
7524-52-9	Methyl tryptophanate hydrochloride	hair conditioner	5	hair conditioner	COC(=O)C(N)Cc1c[nH]c2ccccc12
7675-83-4		skin conditioner|hair conditioner	5	hair conditioner
7779-25-1		skin conditioner|hair conditioner	5	hair conditioner
8016-36-2		skin conditioner|perfumer|nail conditioner|hair conditioner|fragrance	5	hair conditioner
8029-31-0		skin conditioner|hair conditioner	5	hair conditioner
8030-78-2		surfactant|preservative|hair conditioner|antistatic agent	5	hair conditioner
8049-47-6		skin conditioner|hair conditioner	5	hair conditioner
8050-81-5		skin conditioner|hair conditioner|emollient|antifoaming agent	5	hair conditioner
8059-24-3		skin conditioner|hair conditioner|antistatic agent	5	hair conditioner
9000-71-9		skin conditioner|hair conditioner|antistatic agent	5	hair conditioner
9001-01-8		skin conditioner|hair conditioner	5	hair conditioner
9001-73-4		skin conditioner|hair conditioner|antistatic agent	5	hair conditioner
9001-75-6		skin conditioner|hair conditioner	5	hair conditioner
9002-07-7		skin conditioner|hair conditioner	5	hair conditioner
9003-13-8		skin conditioner|hair conditioner|fragrance|antimicrobial	5	hair conditioner
9005-42-9		skin conditioner|hair conditioner|antistatic agent	5	hair conditioner
9005-43-0		skin conditioner|hair conditioner|bulking agent|binder	5	hair conditioner
9005-46-3		skin conditioner|hair conditioner|antistatic agent	5	hair conditioner
9007-28-7	Chondroitin sulfate	skin conditioner|hair conditioner|antistatic agent	5	hair conditioner
9007-34-5		skin conditioner|moisturizer|hair conditioner	5	hair conditioner
9009-99-8		smoother|skin conditioner|hair conditioner|bulking agent|antistatic agent	5	hair conditioner
9015-54-7		skin conditioner|moisturizer|hair conditioner	5	hair conditioner
9045-23-2		skin conditioner|hair conditioner|antistatic agent	5	hair conditioner
9082-07-9		skin conditioner|hair conditioner|antistatic agent	5	hair conditioner
9212-91-9		skin conditioner|hair conditioner|emollient	5	hair conditioner
10098-89-2		skin conditioner|hair conditioner	5	hair conditioner
11046-99-4		skin conditioner|hair conditioner	5	hair conditioner
11308-59-1		skin conditioner|hair conditioner|antistatic agent	5	hair conditioner
12001-77-3		skin conditioner|hair conditioner|antistatic agent	5	hair conditioner
13031-64-6	N-Acetyl dihydrosphingosine	skin conditioner|hair conditioner	5	hair conditioner	CCCCCCCCCCCCCCCC(O)C(CO)NC(C)=O
13254-33-6	Carpronium chloride	hair conditioner|antistatic agent	5	hair conditioner	COC(=O)CCC[N+](C)(C)C
13945-76-1	Lauryl laurate	skin conditioner|hair conditioner	5	hair conditioner	CCCCCCCCCCCCOC(=O)CCCCCCCCCCC
14007-45-5		skin conditioner|hair conditioner	5	hair conditioner
14408-42-5		hair conditioner|antistatic agent	5	hair conditioner
15489-90-4		hair conditioner	5	hair conditioner
16450-41-2	Glutamic acid diethyl ester	skin conditioner|hair conditioner|antistatic agent	5	hair conditioner	CCOC(=O)CCC(N)C(=O)OCC
16485-10-2	Panthenol	skin conditioner|hair conditioner|antistatic agent	5	hair conditioner	CC(C)(CO)C(O)C(=O)NCCCO
16889-14-8	Octadecanamide, N-[2-(diethylamino)ethyl]-	hair conditioner|antistatic agent	5	hair conditioner	CCCCCCCCCCCCCCCCCC(=O)NCCN(CC)CC
17301-53-0		preservative|hair conditioner|antistatic agent	5	hair conditioner
17517-01-0	Stearoxypropyl dimethylamine	hair conditioner	5	hair conditioner	CCCCCCCCCCCCCCCCCCOCCCN(C)C
17627-10-0		hair conditioner|antistatic agent	5	hair conditioner
18684-11-2		hair conditioner|antistatic agent	5	hair conditioner
18758-91-3	Bisphenylhexamethicone	skin conditioner|hair conditioner|emollient|antifoaming agent	5	hair conditioner	C[Si](C)(C)O[Si](O[Si](C)(C)C)(O[Si](O[Si](C)(C)C)(O[Si](C)(C)C)C1=CC=CC=C1)C1=CC=CC=C1
19277-88-4	N,N,N-Trimethyl-3-((1-oxooctadecyl)amino)-1-propanaminium methyl sulfate	hair conditioner|antistatic agent	5	hair conditioner	CCCCCCCCCCCCCCCCCC(=O)NCCC[N+](C)(C)C
19467-38-0		hair conditioner|antistatic agent	5	hair conditioner
20457-75-4		hair conditioner|antistatic agent	5	hair conditioner
21542-96-1	1-Docosanamine, N,N-dimethyl-	hair conditioner|antistatic agent	5	hair conditioner	CCCCCCCCCCCCCCCCCCCCCCN(C)C
21652-27-7		hair conditioner|antistatic agent	5	hair conditioner
22595-45-5	Flavesone	skin conditioner|hair conditioner	5	hair conditioner	CC(C)C(=O)C1C(=O)C(C)(C)C(=O)C(C)(C)C1=O
22834-80-6		skin conditioner|hair conditioner	5	hair conditioner
24170-14-7	1-Octadecanaminium, N-(carboxymethyl)-N,N-bis(2-hydroxyethyl)-, inner salt	hair conditioner|antistatic agent	5	hair conditioner	CCCCCCCCCCCCCCCCCC[N+](CCO)(CCO)CC(O)=O
25104-18-1		hair conditioner	5	hair conditioner
25988-63-0		hair conditioner	5	hair conditioner
27348-32-9	Lysine aspartate	skin conditioner|hair conditioner	5	hair conditioner	NCCCCC(N)C(O)=O
28211-04-3		skin conditioner|hair conditioner	5	hair conditioner
29681-28-5		hair conditioner|antistatic agent	5	hair conditioner
31229-74-0		skin conditioner|hair conditioner|antistatic agent	5	hair conditioner
34364-24-4		skin conditioner|hair conditioner|emollient	5	hair conditioner
34395-72-7	Glycine, N-[3-(dodecylamino)propyl]-	skin conditioner|hair conditioner|antistatic agent	5	hair conditioner	CCCCCCCCCCCCNCCCNCC(O)=O
34644-00-3		skin conditioner|hair conditioner	5	hair conditioner
35239-12-4	Quaternium-16	hair conditioner|antistatic agent	5	hair conditioner	CCCCCCCCCCCCCCCCCC[N+](CCO)(CCO)CCO
35989-16-3		skin conditioner|hair conditioner|antistatic agent	5	hair conditioner
36060-61-4	1H-Imidazole-1-ethanol, 2-heptyl-4,5-dihydro-	hair conditioner|antistatic agent	5	hair conditioner	CCCCCCCC1=NCCN1CCO
36944-85-1		skin conditioner|hair conditioner	5	hair conditioner
37139-99-4		hair conditioner	5	hair conditioner
37478-68-5	1H-Imidazole-1-ethanol, 4,5-dihydro-2-nonyl-	hair conditioner|antistatic agent	5	hair conditioner	CCCCCCCCCC1=NCCN1CCO
39379-66-3		skin conditioner|hair conditioner|antistatic agent	5	hair conditioner
39957-00-1		hair conditioner|antistatic agent	5	hair conditioner
41672-81-5		skin conditioner|hair conditioner|antistatic agent	5	hair conditioner
41760-23-0		hair conditioner|antistatic agent	5	hair conditioner
42492-22-8	N2-(1-Oxododecyl)-L-arginine	skin conditioner|hair conditioner	5	hair conditioner	CCCCCCCCCCCC(=O)NC(CCCN=C(N)N)C(O)=O
50978-31-9		hair conditioner|antistatic agent	5	hair conditioner
51277-96-4		hair conditioner|antistatic agent	5	hair conditioner
52108-64-2		viscosity controlling agent|skin conditioner|hair conditioner|gel former	5	hair conditioner
52132-48-6	Cetylbetanate chloride	hair conditioner	5	hair conditioner	CCCCCCCCCCCCCCCCOC(=O)C[N+](C)(C)C
52315-75-0		viscosity controlling agent|skin conditioner|hair conditioner	5	hair conditioner
53171-04-3		hair conditioner|antistatic agent	5	hair conditioner
53576-52-6	Myristoyl glutamic acid	skin conditioner|hair conditioner	5	hair conditioner	CCCCCCCCCCCCCC(=O)NC(CCC(O)=O)C(O)=O
55819-53-9	2-Hydroxypropanoic acid - N-[3-(dimethylamino)propyl]octadecanamide (1:1)	hair conditioner|antistatic agent	5	hair conditioner	CCCCCCCCCCCCCCCCCC(=O)NCCCN(C)C
55819-54-0	Octadecanamide, N-[3-[bis(2-hydroxyethyl)amino]propyl]-	hair conditioner|antistatic agent	5	hair conditioner	CCCCCCCCCCCCCCCCCC(=O)NCCCN(CCO)CCO
55895-85-7		skin conditioner|hair conditioner|antistatic agent	5	hair conditioner
57022-38-5	Decarboxy carnosine hydrochloride	skin conditioner|hair conditioner|antistatic agent	5	hair conditioner	NCCC(=O)NCCC1=CN=CN1
58725-47-6		skin conditioner|hair conditioner	5	hair conditioner
58748-40-6		hair conditioner|antistatic agent	5	hair conditioner
59441-32-6		skin conditioner|hair conditioner	5	hair conditioner
59599-61-0		skin conditioner|hair conditioner|antistatic agent	5	hair conditioner
60372-77-2	Ethyl lauroyl arginate hydrochloride	skin conditioner|hair conditioner	5	hair conditioner	CCCCCCCCCCCC(=O)NC(CCCN=C(N)N)C(=O)OCC
60650-88-6		smoother|skin conditioner|hair conditioner|antistatic agent	5	hair conditioner
60650-89-7		smoother|skin conditioner|hair conditioner|antistatic agent	5	hair conditioner
60752-63-8		hair conditioner|antistatic agent	5	hair conditioner
61372-91-6	Dibehenyl methylamine	hair conditioner|antistatic agent	5	hair conditioner	CCCCCCCCCCCCCCCCCCCCCCN(C)CCCCCCCCCCCCCCCCCCCCCC
[truncated: 12,273 more rows]
