# Supplementary material for: High-throughput screening of chemicals as functional substitutes using structure-based classification models
Source: Royal Society of Chemistry journal article supplement (doi:10.1039/c6gc02744j), 2016-12-20
Supplement: c6gc02744j3.xlsx [file c6gc02744j3.xlsx]

## Sheet: Sheet1
Structural ToxPrint Descriptors Used in QSURs
atom.element_main_group
atom.element_metal_group_I_II
atom.element_metal_group_III
atom.element_metal_metalloid
atom.element_metal_poor_metal
atom.element_metal_transistion_metal
atom.element_noble_gas
bond.C.N_cyano_acylcyanide
bond.C.N_cyano_cyanamide
bond.C.N_cyano_cyanohydrin
bond.C.N_nitrile_ab.acetylenic
bond.C.N_nitrile_ab.unsaturated
bond.C.N_nitrile_generic
bond.C.N_nitrile_isonitrile
bond.C.N_nitrile
bond.C..Z..C.Q_a.haloalcohol
bond.C..Z..C.Q_a.halocarbonyl
bond.C..Z..C.Q_a.haloether
bond.C..Z..C.Q_a.haloketone_perhalo
bond.C..Z..C.Q_b.halocarbonyl
bond.C..Z..C.Q_haloamine_haloethyl_.N.mustard.
bond.C..Z..C.Q_halocarbonyl_dichloro_quinone_.1_2..
bond.C..Z..C.Q_halocarbonyl_dichloro_quinone_.1_4..
bond.C..Z..C.Q_halocarbonyl_dichloro_quinone_.1_5..
bond.C..Z..C.Q_haloether_dibenzodioxin_1.halo
bond.C..Z..C.Q_haloether_dibenzodioxin_2.halo
bond.C..Z..C.Q_haloether_dibenzodioxin_dichloro_.2_7..
bond.C..Z..C.Q_haloether_dibenzodioxin_tetrachloro_.2_3_7_8..
bond.C..Z..C.Q_haloether_pyrimidine_2.halo.
bond.C..O.N_carbamate_dithio
bond.C..O.N_carbamate_thio
bond.C..O.N_carbamate_thio_generic
bond.C..O.N_carbamate
bond.C..O.N_carboxamide_.NH2.
bond.C..O.N_carboxamide_.NHR.
bond.C..O.N_carboxamide_.NR2.
bond.C..O.N_carboxamide_generic
bond.C..O.N_carboxamide_thio
bond.C..O.N_dicarboxamide_N.hydroxy
bond.C..O.O_acidAnhydride
bond.C..O.O_carboxylicAcid_alkenyl
bond.C..O.O_carboxylicAcid_alkyl
bond.C..O.O_carboxylicAcid_aromatic
bond.C..O.O_carboxylicAcid_generic
bond.C..O.O_carboxylicEster_4.nitrophenol
bond.C..O.O_carboxylicEster_acyclic
bond.C..O.O_carboxylicEster_aliphatic
bond.C..O.O_carboxylicEster_alkenyl
bond.C..O.O_carboxylicEster_alkyl
bond.C..O.O_carboxylicEster_aromatic
bond.C..O.O_carboxylicEster_cyclic_b.propiolactone
bond.C..O.O_carboxylicEster_N.hydroxytriazole_.aromatic.
bond.C..O.O_carboxylicEster_O.pentafluorophenoxy
bond.C..O.O_carboxylicEster_thio
bond.C.N_carbodiimide
bond.C.N_carboxamidine_generic
bond.C.N_guanidine_generic
bond.C.N_imine_C.connect_H_gt_0.
bond.C.N_imine_N.connect_noZ.
bond.C.N_imine_oxy
bond.C.O_acyl_halide
bond.C.O_acyl_hydrazide
bond.C.O_aldehyde_alkyl
bond.C.O_aldehyde_aromatic
bond.C.O_aldehyde_generic
bond.C.O_carbonyl_1_2.di
bond.C.O_carbonyl_ab.acetylenic
bond.C.O_carbonyl_ab.unsaturated_aliphatic_.michael_acceptors.
bond.C.O_carbonyl_ab.unsaturated_generic
bond.C.O_carbonyl_azido
bond.C.O_carbonyl_generic
bond.C.S_acyl_thio_halide
bond.C.S_carbonyl_thio_generic
bond.CC..O.C_ketone_aliphatic_acyclic
bond.CC..O.C_ketone_aliphatic_generic
bond.CC..O.C_ketone_alkane_cyclic
bond.CC..O.C_ketone_alkane_cyclic_.C4.
bond.CC..O.C_ketone_alkane_cyclic_.C5.
bond.CC..O.C_ketone_alkane_cyclic_.C6.
bond.CC..O.C_ketone_alkene_cyclic_.C6.
bond.CC..O.C_ketone_alkene_cyclic_.C7.
bond.CC..O.C_ketone_alkene_cyclic_2.en.1.one
bond.CC..O.C_ketone_alkene_cyclic_2.en.1.one_generic
bond.CC..O.C_ketone_alkene_cyclic_3.en.1.one
bond.CC..O.C_ketone_alkene_generic
bond.CC..O.C_ketone_aromatic_aliphatic
bond.CC..O.C_ketone_generic
bond.CC..O.C_ketone_methyl_aliphatic
bond.CC..O.C_quinone_1_2.benzo
bond.CC..O.C_quinone_1_2.naphtho
bond.CC..O.C_quinone_1_4.benzo
bond.CC..O.C_quinone_1_4.naphtho
bond.CN_amine_alicyclic_generic
bond.CN_amine_aliphatic_generic
bond.CN_amine_alkyl_ethanolamine
bond.CN_amine_alkyl_methanolamine
bond.CN_amine_aromatic_benzidine
bond.CN_amine_aromatic_generic
bond.CN_amine_aromatic_N.hydroxy
bond.CN_amine_pri.NH2_alkyl
bond.CN_amine_pri.NH2_aromatic
bond.CN_amine_pri.NH2_generic
bond.CN_amine_sec.NH_alkyl
bond.CN_amine_sec.NH_aromatic
bond.CN_amine_sec.NH_aromatic_aliphatic
bond.CN_amine_sec.NH_generic
bond.CN_amine_ter.N_aliphatic
bond.CN_amine_ter.N_aromatic
bond.CN_amine_ter.N_aromatic_aliphatic
bond.CN_amine_ter.N_generic
bond.CNO_amineOxide_aromatic
bond.CNO_amineOxide_dimethyl_alkyl
bond.CNO_amineOxide_generic
bond.COC_ether_aliphatic
bond.COC_ether_aliphatic__aromatic
bond.COC_ether_alkenyl
bond.COC_ether_aromatic
bond.COH_alcohol_aliphatic_generic
bond.COH_alcohol_alkene
bond.COH_alcohol_alkene_acyclic
bond.COH_alcohol_alkene_cyclic
bond.COH_alcohol_allyl
bond.COH_alcohol_aromatic
bond.COH_alcohol_aromatic_phenol
bond.COH_alcohol_benzyl
bond.COH_alcohol_diol_.1_1..
bond.COH_alcohol_diol_.1_2..
bond.COH_alcohol_diol_.1_3..
bond.COH_alcohol_generic
bond.COH_alcohol_pri.alkyl
bond.COH_alcohol_sec.alkyl
bond.COH_alcohol_ter.alkyl
bond.CS_sulfide_di.
bond.CS_sulfide_dialkyl
bond.CS_sulfide
bond.CX_halide_alkenyl.Cl_acyclic
bond.CX_halide_alkenyl.Cl_dichloro_.1_1..
bond.CX_halide_alkenyl.X_acyclic
bond.CX_halide_alkenyl.X_acyclic_generic
bond.CX_halide_alkenyl.X_dihalo_.1_1..
bond.CX_halide_alkenyl.X_dihalo_.1_2..
bond.CX_halide_alkenyl.X_generic
bond.CX_halide_alkenyl.X_trihalo_.1_1_2..
bond.CX_halide_alkyl.Cl_dichloro_.1_1..
bond.CX_halide_alkyl.Cl_ethyl
bond.CX_halide_alkyl.Cl_trichloro_.1_1_1..
bond.CX_halide_alkyl.F_perfluoro_butyl
bond.CX_halide_alkyl.F_perfluoro_ethyl
bond.CX_halide_alkyl.F_perfluoro_hexyl
bond.CX_halide_alkyl.F_perfluoro_octyl
bond.CX_halide_alkyl.F_tetrafluoro_.1_1_1_2..
bond.CX_halide_alkyl.F_trifluoro_.1_1_1..
bond.CX_halide_alkyl.X_aromatic_alkane
bond.CX_halide_alkyl.X_aromatic_generic
bond.CX_halide_alkyl.X_benzyl_alkane
bond.CX_halide_alkyl.X_benzyl_generic
bond.CX_halide_alkyl.X_bicyclo.2_2_1.heptane
bond.CX_halide_alkyl.X_bicyclo.2_2_1.heptene
bond.CX_halide_alkyl.X_dihalo_.1_1..
bond.CX_halide_alkyl.X_dihalo_.1_2..
bond.CX_halide_alkyl.X_dihalo_.1_3.
bond.CX_halide_alkyl.X_ethyl
bond.CX_halide_alkyl.X_ethyl_generic
bond.CX_halide_alkyl.X_generic
bond.CX_halide_alkyl.X_primary
bond.CX_halide_alkyl.X_secondary
bond.CX_halide_alkyl.X_tertiary
bond.CX_halide_alkyl.X_tetrahalo_.1_1_2_2..
bond.CX_halide_alkyl.X_trihalo_.1_1_1..
bond.CX_halide_alkyl.X_trihalo_.1_1_2..
bond.CX_halide_alkyl.X_trihalo_.1_2_3..
bond.CX_halide_allyl.Cl_acyclic
bond.CX_halide_allyl.X_acyclic
bond.CX_halide_aromatic.Cl_dichloro_pyridine_.1_2..
bond.CX_halide_aromatic.Cl_dichloro_pyridine_.1_3..
bond.CX_halide_aromatic.Cl_dichloro_pyridine_.1_4..
bond.CX_halide_aromatic.Cl_dichloro_pyridine_.1_5..
bond.CX_halide_aromatic.Cl_trihalo_benzene_.1_2_4..
bond.CX_halide_aromatic.X_biphenyl
bond.CX_halide_aromatic.X_dihalo_benzene_.1_2..
bond.CX_halide_aromatic.X_dihalo_benzene_.1_3..
bond.CX_halide_aromatic.X_dihalo_benzene_.1_4..
bond.CX_halide_aromatic.X_ether_aromatic_.Ph.O.Ph.
bond.CX_halide_aromatic.X_ether_aromatic_.Ph.O.Ph._generic
bond.CX_halide_aromatic.X_generic
bond.CX_halide_aromatic.X_halo_phenol
bond.CX_halide_aromatic.X_halo_phenol_meta
bond.CX_halide_aromatic.X_halo_phenol_ortho
bond.CX_halide_aromatic.X_halo_phenol_para
bond.CX_halide_aromatic.X_trihalo_benzene_.1_2_3..
bond.CX_halide_aromatic.X_trihalo_benzene_.1_3_5..
bond.CX_halide_generic.X_dihalo_.1_2..
bond.N..O._nitrate_generic
bond.N..O._nitro_ab.acetylenic
bond.N..O._nitro_ab.unsaturated
bond.N..O._nitro_aromatic
bond.N..O._nitro_C
bond.N..O._nitro_N
bond.N..C._amino
bond.N..N....N.._azide_aromatic
bond.N..N....N.._azide_generic
bond.N.C.O_isocyanate_.O_S.
bond.N.C.O_isocyanate_generic
bond.N.C.O_isocyanate_thio
bond.N.N_azo_aliphatic_acyclic
bond.N.N_azo_aromatic
bond.N.N_azo_cyanamide
bond.N.N_azo_generic
bond.N.N_azo_oxy
bond.N.O_nitrite_neutral
bond.N.O_N.nitroso_alkyl_mono
bond.N.O_N.nitroso_dialkyl
bond.N.O_N.nitroso_generic
bond.N.O_N.nitroso
bond.NC.O_aminocarbonyl_generic
bond.NC.O_urea_generic
bond.NC.O_urea_thio
bond.NN_hydrazine_acyclic_.connect_noZ.
bond.NN_hydrazine_alkyl_generic
bond.NN_hydrazine_alkyl_H
bond.NN_hydrazine_alkyl_H2
bond.NN_hydrazine_alkyl_HH
bond.NN_hydrazine_alkyl_HH2
bond.NN_hydrazine_alkyl_N.connect_Z.1.
bond.NN.N_triazene
bond.NO_amine_hyrdroxyl
bond.NO_amino_oxy_generic
bond.OZ_oxide_hyroxy
bond.OZ_oxide_peroxy
bond.OZ_oxide
bond.P..O.N_phosphonamide
bond.P..O.N_phosphoramide_diamidophosphate
bond.P..O.N_phosphoramide_monoamidophosphate
bond.P..O.N_phosphoramide_phosphotriamide
bond.P.C_phosphorane_generic
bond.P.O_phosphate_alkyl_ester
bond.P.O_phosphate_dithio
bond.P.O_phosphate_thio
bond.P.O_phosphate_thioate
bond.P.O_phosphate_trithio_phosphorothioate
bond.P.O_phosphate
bond.P.O_phosphonate_acid
bond.P.O_phosphonate_aliphatic_ester
bond.P.O_phosphonate_alkyl_ester
bond.P.O_phosphonate_cyano
bond.P.O_phosphonate_ester
bond.P.O_phosphonate_thio_dimethyl_methylphosphonothionate
bond.P.O_phosphonate_thio_acid
bond.P.O_phosphonate_thio_O_S.dimethyl_methylphosphonothioate
bond.P.O_phosphonate_thio_phosphonotrithioate
bond.P.O_phosphonate
bond.P.O_phosphorus_oxo
bond.PC_phosphine_organo_generic
bond.PC_phosphorus_organo_generic
bond.PO_phosphine_oxy
bond.PO_phosphine_oxy_generic
bond.PO_phosphite_generic
bond.PO_phosphite
bond.P.N_generic
bond.P.S_generic
bond.QQ.Q.O_S._sulfhydride
bond.QQ.Q.O_S._sulfide_di.
bond.QQ.Q.O_S._sulfur_oxide
bond.quatN_alkyl_acyclic
bond.quatN_ammonium_inorganic
bond.quatN_b.carbonyl
bond.quatN_generic
bond.quatN_trimethyl_alkyl_acyclic
bond.quatP_phosphonium
bond.quatS
bond.S..O.N_sulfonamide_ab.acetylenic
bond.S..O.N_sulfonamide_ab.unsaturated
bond.S..O.N_sulfonamide
bond.S..O.N_sulfonylamide
bond.S..O.O_sulfonate
bond.S..O.O_sulfonicAcid_acyclic_.chain.
bond.S..O.O_sulfonicAcid_anion
bond.S..O.O_sulfonicAcid_cyclic_.ring.
bond.S..O.O_sulfonicAcid_generic
bond.S..O.O_sulfonicEster_acyclic_.S.C.ring..
bond.S..O.O_sulfonicEster_acyclic_S.C_.chain.
bond.S..O.O_sulfonicEster_aliphatic_.S.C.
bond.S..O.O_sulfonicEster_alkyl_O.C_.H.0.
bond.S..O.O_sulfonicEster_alkyl_S.C
bond.S..O.O_sulfonicEster_cyclic_S..any_in_ring.
bond.S..O.O_sulfonyl_triflate
bond.S..O.O_sulfuricAcid_generic
bond.S..O.X_sulfonylhalide_fluoride
bond.S..O.X_sulfonylhalide
bond.S.O_sulfonyl_a_b.acetylenic
bond.S.O_sulfonyl_a_b.unsaturated
bond.S.O_sulfonyl_cyanide
bond.S.O_sulfonyl_generic
bond.S.O_sulfonyl_S_.connect_Z.2.
bond.S.O_sulfoxide
bond.S.N_generic
bond.Se.Q_selenium_oxo
bond.Se.Q_selenium_thio
bond.Se.Q_selenium_thioxo
bond.Se.Q_selenocarbon
bond.Se.Q_selenohalide
bond.X.any._halide
bond.X.any_.C._halide_inorganic
bond.X.Z_halide..N_P._heteroatom
bond.X.Z_halide..N_P._heteroatom_N
bond.X.Z_halide..N_P._heteroatom_N_generic
bond.X.Z_halide..O_S._heteroatom
bond.X.Z_halide_oxo
bond.metal_group_I_II_Ca_oxy_oxo
bond.metal_group_I_II_oxo
bond.metal_group_I_II_oxy
bond.metal_group_III_other_Al_generic
bond.metal_group_III_other_Al_halide
bond.metal_group_III_other_Al_organo
bond.metal_group_III_other_Al_oxo
bond.metal_group_III_other_Al_oxy
bond.metal_group_III_other_Bi_generic
bond.metal_group_III_other_Bi_halide
bond.metal_group_III_other_Bi_organo
bond.metal_group_III_other_Bi_oxo
bond.metal_group_III_other_Bi_oxy
bond.metal_group_III_other_Bi_sulfide
bond.metal_group_III_other_Bi_sulfide.II.
bond.metal_group_III_other_generic
bond.metal_group_III_other_generic_oxo
bond.metal_group_III_other_generic_oxy
bond.metal_group_III_other_In_generic
bond.metal_group_III_other_In_halide
bond.metal_group_III_other_In_oxy
bond.metal_group_III_other_In_phosphide_arsenide
bond.metal_group_III_other_Pb_generic
bond.metal_group_III_other_Pb_halide
bond.metal_group_III_other_Pb_organo
bond.metal_group_III_other_Pb_oxo
bond.metal_group_III_other_Pb_oxy
bond.metal_group_III_other_Pb_sulfide
bond.metal_group_III_other_Pb_sulfide.II.
bond.metal_group_III_other_Sn_generic
bond.metal_group_III_other_Sn_halide
bond.metal_group_III_other_Sn_organo
bond.metal_group_III_other_Sn_oxo
bond.metal_group_III_other_Sn_oxy
bond.metal_group_III_other_Sn_sulfide
bond.metal_group_III_other_Sn_sulfide.II.
bond.metal_group_III_other_Th_generic
bond.metal_group_III_other_Th_halide
bond.metal_group_III_other_Th_oxo
bond.metal_metalloid_alkylSiloxane
bond.metal_metalloid_As_generic
bond.metal_metalloid_As_halide
bond.metal_metalloid_As_organo
bond.metal_metalloid_As_oxo
bond.metal_metalloid_As_oxy
bond.metal_metalloid_As_sulfide
bond.metal_metalloid_As_sulfide.II.
bond.metal_metalloid_B_generic
bond.metal_metalloid_B_halide
bond.metal_metalloid_B_organo
bond.metal_metalloid_B_oxo
bond.metal_metalloid_B_oxy
bond.metal_metalloid_oxo
bond.metal_metalloid_oxy
bond.metal_metalloid_Sb_generic
bond.metal_metalloid_Sb_halide
bond.metal_metalloid_Sb_organo
bond.metal_metalloid_Sb_oxo
bond.metal_metalloid_Sb_oxy
bond.metal_metalloid_Sb_sulfide
bond.metal_metalloid_Sb_sulfide.II.
bond.metal_metalloid_Si_generic
bond.metal_metalloid_Si_halide
bond.metal_metalloid_Si_organo
bond.metal_metalloid_Si_oxo
bond.metal_metalloid_Si_oxy
bond.metal_metalloid_Te_generic
bond.metal_metalloid_Te_halide
bond.metal_metalloid_Te_organo
bond.metal_metalloid_Te_oxo
bond.metal_metalloid_Te_oxy
bond.metal_metalloid_Te_sulfide
bond.metal_metalloid_Te_sulfide.II.
bond.metal_metalloid_trimethylsilane
bond.metal_transition_Ag_oxy_oxo
bond.metal_transition_Cd_generic
bond.metal_transition_Cd_halide
bond.metal_transition_Cr_generic
bond.metal_transition_Cr_oxo
bond.metal_transition_Cr_oxy
bond.metal_transition_Cu_generic
bond.metal_transition_Cu_oxy_oxo
bond.metal_transition_Fe_generic
bond.metal_transition_Hg_generic
bond.metal_transition_Hg_halide
bond.metal_transition_Hg_organo
bond.metal_transition_Hg_oxo
bond.metal_transition_Hg_oxy
bond.metal_transition_Hg_sulfide
bond.metal_transition_Hg_sulfide.II.
bond.metal_transition_Mn_generic
bond.metal_transition_Mn_oxy_oxo
bond.metal_transition_Mo_oxy_oxo
bond.metal_transition_Mo_sulfide
bond.metal_transition_oxo
bond.metal_transition_oxy
bond.metal_transition_Pt_generic
bond.metal_transition_Pt_halide
bond.metal_transition_Pt_nitrogen
bond.metal_transition_Pt_organo
bond.metal_transition_Pt_oxy
bond.metal_transition_Ti_generic
bond.metal_transition_Ti_organo
bond.metal_transition_Ti_oxo
bond.metal_transition_Ti_oxy
bond.metal_transition_Tl_halide
bond.metal_transition_V_generic
bond.metal_transition_V_oxo
bond.metal_transition_V_oxy
bond.metal_transition_W_generic
bond.metal_transition_W_oxo
bond.metal_transition_Zn_generic
bond.metal_transition_Zn_phosphide
chain.alkaneBranch_isopropyl_C3
chain.alkaneBranch_t.butyl_C4
chain.alkaneBranch_neopentyl_C5
chain.alkaneBranch_isohexyl_pentyl_3.methyl
chain.alkaneBranch_isooctyl_heptyl_3.methyl
chain.alkaneBranch_isooctyl_hexyl_2.ethyl
chain.alkaneBranch_isooctyl_hexyl_2.methyl
chain.alkaneBranch_isononyl_heptyl_2_5.methyl
chain.alkaneBranch_isononyl_pentyl_1_1_1_3.metyl
chain.alkaneBranch_isodecyl_octyl_1_2.methyl
chain.alkaneCyclic_ethyl_C2_.connect_noZ.
chain.alkaneCyclic_propyl_C3
chain.alkaneCyclic_butyl_C4
chain.alkaneCyclic_pentyl_C5
chain.alkaneCyclic_hexyl_C6
chain.alkaneLinear_ethyl_C2.H_gt_1.
chain.alkaneLinear_ethyl_C2_.connect_noZ_CN.4.
chain.alkaneLinear_propyl_C3
chain.alkaneLinear_butyl_C4
chain.alkaneLinear_hexyl_C6
chain.alkaneLinear_octyl_C8
chain.alkaneLinear_decyl_C10
chain.alkaneLinear_dodedyl_C12
chain.alkaneLinear_tetradecyl_C14
chain.alkaneLinear_hexadecyl_C16
chain.alkaneLinear_stearyl_C18
chain.alkeneBranch_diene_2_6.octadiene
chain.alkeneBranch_diene_2_7.octadiene_.linalyl.
chain.alkeneBranch_mono.ene_2.butene
chain.alkeneBranch_mono.ene_2.butene_2.propyl_.tiglate.
chain.alkeneCyclic_diene_1_3.cyclohexadiene_C6
chain.alkeneCyclic_diene_1_5.cyclooctadiene
chain.alkeneCyclic_diene_cyclohexene
chain.alkeneCyclic_diene_cyclopentadiene
chain.alkeneCyclic_ethene_C_.connect_noZ.
chain.alkeneCyclic_ethene_generic
chain.alkeneCyclic_triene_tropilidine
chain.alkeneLinear_diene_1_2.butene
chain.alkeneLinear_diene_1_3.butene
chain.alkeneLinear_diene_1_4.diene
chain.alkeneLinear_diene_linoleic_.C18.
chain.alkeneLinear_mono.ene_2.hexene
chain.alkeneLinear_mono.ene_allyl
chain.alkeneLinear_mono.ene_ehtylene_terminal
chain.alkeneLinear_mono.ene_ethylene
chain.alkeneLinear_mono.ene_ethylene_generic
chain.alkeneLinear_mono.ene_oleic_.C18.
chain.alkeneLinear_mono.ene_vinyl
chain.alkeneLinear_triene_linolenic_.C18.
chain.alkyne_ethyne_generic
chain.aromaticAlkane_Ar.C_meta
chain.aromaticAlkane_Ar.C_ortho
chain.aromaticAlkane_Ar.C.Ar
chain.aromaticAlkane_Ph.C1_acyclic_connect_H_gt_1
chain.aromaticAlkane_Ph.C1_acyclic_connect_noDblBd
chain.aromaticAlkane_Ph.C1_acyclic_generic
chain.aromaticAlkane_Ph.1_4.C1_acyclic
chain.aromaticAlkane_Ph.C1.Ph
chain.aromaticAlkane_Ph.C2
chain.aromaticAlkane_Ph.C4
chain.aromaticAlkane_Ph.C6
chain.aromaticAlkane_Ph.C8
chain.aromaticAlkane_Ph.C9_nonylphenyl
chain.aromaticAlkane_Ph.C10
chain.aromaticAlkane_Ph.C12
chain.aromaticAlkane_Ph.C1_cyclic
chain.aromaticAlkene_Ph.C2_acyclic_generic
chain.aromaticAlkene_Ph.C2_styrene
chain.aromaticAlkene_Ph.C2
chain.aromaticAlkene_Ph.C3
chain.aromaticAlkene_Ph.C4_isocrotylbenzene
chain.aromaticAlkene_Ph.C4_phenylbutadiene
chain.aromaticAlkene_Ph.C2_cyclic
chain.oxy.alkaneLinear_ethyleneOxide_EO1
chain.oxy.alkaneLinear_ethylenOxide_EO1.O.
chain.oxy.alkaneLinear_ethyleneOxide_EO2
chain.oxy.alkaneLinear_ethyleneOxide_EO3
chain.oxy.alkaneLinear_ethyleneOxide_EO4
chain.oxy.alkaneLinear_ethyleneOxide_EO6
chain.oxy.alkaneLinear_ethyleneOxide_EO8
chain.oxy.alkaneLinear_ethyleneOxide_EO10
chain.oxy.alkaneLinear_ethyleneOxide_EO12
chain.oxy.alkaneLinear_ethyleneOxide_EO14
chain.oxy.alkaneLinear_ethyleneOxide_EO16
chain.oxy.alkaneLinear_ethyleneOxide_EO18
chain.oxy.alkaneLinear_ethyleneOxide_EO20
chain.oxy.alkaneBranch_propyleneoxide_PO1
chain.oxy.alkaneBranch_propyleneoxide_PO2
chain.oxy.alkaneBranch_propyleneoxide_PO3
chain.oxy.alkaneBranch_propyleneoxide_PO4
chain.oxy.alkaneBranch_propyleneoxide_PO6
chain.oxy.alkaneBranch_propyleneoxide_PO8
chain.oxy.alkaneBranch_propyleneoxide_PO10
chain.oxy.alkaneLinear_carboxylicEster_AEOC
chain.oxy.alkaneLinear_sulfuricEster_AEOS
group.aminoAcid_aminoAcid_generic
group.aminoAcid_alanine
group.aminoAcid_arginine
group.aminoAcid_asparagine
group.aminoAcid_aspartic_acid
group.aminoAcid_cysteine
group.aminoAcid_glutamic_acid
group.aminoAcid_glutamine
group.aminoAcid_glycine
group.aminoAcid_histidine
group.aminoAcid_isoleucine
group.aminoAcid_leucine
group.aminoAcid_lysine
group.aminoAcid_methionine
group.aminoAcid_phenylalanine
group.aminoAcid_proline
group.aminoAcid_serine
group.aminoAcid_threonine
group.aminoAcid_tryptophan
group.aminoAcid_tyrosine
group.aminoAcid_valine
group.carbohydrate_aldohexose
group.carbohydrate_aldopentose
group.carbohydrate_hexofuranose_hexulose
group.carbohydrate_hexofuranose
group.carbohydrate_hexopyranose_2.deoxy
group.carbohydrate_hexopyranose_fructose
group.carbohydrate_hexopyranose_generic
group.carbohydrate_hexopyranose_glucose
group.carbohydrate_hexopyranose_maltose
group.carbohydrate_inositol
group.carbohydrate_ketohexose
group.carbohydrate_ketopentose
group.carbohydrate_pentofuranose_2.deoxy
group.carbohydrate_pentofuranose
group.carbohydrate_pentopyranose
group.ligand_path_4_bidentate_aminoacetaldehyde
group.ligand_path_4_bidentate_aminoacetate
group.ligand_path_4_bidentate_aminoethanol
group.ligand_path_4_bidentate_bipyridyl
group.ligand_path_4_bidentate_ethylenediamine
group.ligand_path_4_macrocycle_tetrazacyclododecane
group.ligand_path_4_macrocycle_triethylenetriamine
group.ligand_path_4_polydentate
group.ligand_path_4_polydentate_EDTA
group.ligand_path_4_polydentate_NTA
group.ligand_path_4_tridentate
group.ligand_path_4.5_macrocycle_tetrazacyclotetradecane
group.ligand_path_4.5_tridentate
group.ligand_path_5_bidentate_ACAC
group.ligand_path_5_bidentate_aminopropanal
group.ligand_path_5_bidentate_bipyridylmethyl
group.ligand_path_5_bidentate_bipyrrolidilmethyl
group.ligand_path_5_bidentate_diformamide
group.ligand_path_5_bidentate_malonate
group.ligand_path_5_bidentate_propandiamine
group.ligand_path_5_bidentate_propanolamine
group.ligand_path_5_macrocycle
group.ligand_path_5_tridentate
group.ligand_path_5_tridentate_3.hydroxycadaverine
group.ligand_path_5.7_bidentate
group.nucleobase_adenine
group.nucleobase_cytosine
group.nucleobase_guanine
group.nucleobase_guanine_7.methyl
group.nucleobase_thymine
group.nucleobase_uracil
group.nucleobase_hypoxanthine
group.nucleobase_xanthine_purine.2_6.dione
ring.aromatic_benzene
ring.aromatic_biphenyl
ring.aromatic_phenyl
ring.fused_.5_6._indane
ring.fused_.5_6._indene
ring.fused_.5_7._azulene
ring.fused_.6_6._naphthalene
ring.fused_.6_6._tetralin
ring.fused_PAH_acenaphthylene
ring.fused_PAH_anthanthrene
ring.fused_PAH_anthracene
ring.fused_PAH_benz.a.anthracene
ring.fused_PAH_benzophenanthrene
ring.fused_PAH_fluorene
ring.fused_PAH_phenanthrene
ring.fused_PAH_pyrene
ring.fused_steroid_generic_.5_6_6_6.
ring.hetero_.3._N_aziridine
ring.hetero_.3._O_epoxide
ring.hetero_.3._Z_generic
ring.hetero_.4._N_azetidine
ring.hetero_.4._N_beta_lactam
ring.hetero_.4._O_oxetane
ring.hetero_.4._Z_generic
ring.hetero_.5._N_imidazole
ring.hetero_.5._N_pyrazole
ring.hetero_.5._N_pyrrole
ring.hetero_.5._N_pyrrole_generic
ring.hetero_.5._N_pyrrolidone_.2..
ring.hetero_.5._N_tetrazole
ring.hetero_.5._N_triazole_.1_2_3..
ring.hetero_.5._N_triazole_.1_2_4..
ring.hetero_.5._N_triazole_.1_3_4..
ring.hetero_.5._N_O_isoxazole
ring.hetero_.5._N_O_oxazole
ring.hetero_.5._N_S_isothiazole
ring.hetero_.5._N_S_thiadiazole_.1_3_4..
ring.hetero_.5._N_S_thiazole
ring.hetero_.5._O_dioxolane_.1_3..
ring.hetero_.5._O_furan
ring.hetero_.5._O_furan_a.nitro
ring.hetero_.5._O_oxolane
ring.hetero_.5._S_thiophene
ring.hetero_.5._Z_1_2_3_4.Z
ring.hetero_.5._Z_1_2_3.Z
ring.hetero_.5._Z_1_2_4_1_3_4.Z
ring.hetero_.5._Z_1_2.Z
ring.hetero_.5._Z_1_3.Z
ring.hetero_.5._Z_1.Z
ring.hetero_.5_5._N_pyrrolizidine
ring.hetero_.5_5._Z_generic
ring.hetero_.5_5_6._O_aflatoxin_generic
ring.hetero_.5_6._N_benzimidazole
ring.hetero_.5_6._N_indazole
ring.hetero_.5_6._N_indole
ring.hetero_.5_6._N_isoindole_1_3.dione
ring.hetero_.5_6._N_isoindole_1.one
ring.hetero_.5_6._N_purine
ring.hetero_.5_6._N_S_benzothiazole_.1_3..
ring.hetero_.5_6._O_benzodioxole_.1_3..
ring.hetero_.5_6._O_benzofuran
ring.hetero_.5_6._Z_generic
ring.hetero_.5_7._Z_generic
ring.hetero_.6._N_diazine_.1_2.._generic
ring.hetero_.6._N_diazine_.1_3.._generic
ring.hetero_.6._N_piperazine
ring.hetero_.6._N_piperidine
ring.hetero_.6._N_pyrazine
ring.hetero_.6._N_pyridazine
ring.hetero_.6._N_pyridine
ring.hetero_.6._N_pyridine_generic
ring.hetero_.6._N_pyrimidine
ring.hetero_.6._N_pyrimidine_2_4.dione
ring.hetero_.6._N_tetrazine_.1_2_3_4..
ring.hetero_.6._N_tetrazine_generic
ring.hetero_.6._N_triazine_.1_2_3..
ring.hetero_.6._N_triazine_.1_2_4..
ring.hetero_.6._N_triazine_.1_3_5..
ring.hetero_.6._N_triazine_generic
ring.hetero_.6._N_O_1_4.oxazine_generic
ring.hetero_.6._N_O_1_4.oxazine_morpholine
ring.hetero_.6._O_dioxane_.1_4.._generic
ring.hetero_.6._O_pyran_generic
ring.hetero_.6._Z_1.
ring.hetero_.6._Z_1_2.
ring.hetero_.6._Z_1_2_3.
ring.hetero_.6._Z_1_2_3_4.
ring.hetero_.6._Z_1_2_3_5.
ring.hetero_.6._Z_1_2_4.
ring.hetero_.6._Z_1_2_4_5.
ring.hetero_.6._Z_1_3.
ring.hetero_.6._Z_1_3_5.
ring.hetero_.6._Z_1_4.
ring.hetero_.6._Z_generic
ring.hetero_.6_5_6._N_carbazole
ring.hetero_.6_5_6._O_benzofuran_dibenzo
ring.hetero_.6_6._N_isoquinoline
ring.hetero_.6_6._N_pteridine
ring.hetero_.6_6._N_pteridine_generic
ring.hetero_.6_6._N_quinazoline
ring.hetero_.6_6._N_quinoline
ring.hetero_.6_6._N_quinoxaline
ring.hetero_.6_6._O_benzodioxin_.1_4..
ring.hetero_.6_6._O_benzopyran
ring.hetero_.6_6._O_benzopyrone_.1_2..
ring.hetero_.6_6._O_benzopyrone_.1_4..
ring.hetero_.6_6._Z_generic
ring.hetero_.6_6_6._N_acridine
ring.hetero_.6_6_6._N_pteridine_flavin_generic
ring.hetero_.6_6_6._N_S_phenothiazine
ring.hetero_.6_6_6._O_benzopyran_dibenzo.b_d.
ring.hetero_.6_6_6._O_benzopyran_dibenzo.b_e.
ring.hetero_.6_7._N_benzodiazepine_.1_4..
ring.hetero_.7._generic_1_2.Z
ring.hetero_.7._generic_1_3.Z
ring.hetero_.7._generic_1_4.Z
ring.hetero_.7._generic_1.Z
ring.hetero_.7._N_azepine_generic
ring.hetero_.7._N_diazepine_.1_4..
ring.hetero_.7._O_oxepin
ring.polycycle_bicyclo_.2.1.1.heptane
ring.polycycle_bicyclo_.2.1.1.hexane
ring.polycycle_bicyclo_.2.1.1.hexane_5.oxabicyclo
ring.polycycle_bicyclo_.2.2.2.octane
ring.polycycle_bicyclo_.2.2.2.octatriene
ring.polycycle_bicyclo_.3.2.1.octane
ring.polycycle_bicyclo_.3.2.2.nonane
ring.polycycle_bicyclo_.3.3.1.nonane
ring.polycycle_bicyclo_.3.3.2.decane
ring.polycycle_bicyclo_.4.2.0.octadiene
ring.polycycle_bicyclo_.4.3.1.decane
ring.polycycle_bicyclo_.4.4.1.undecane
ring.polycycle_bicyclo_.5.1.0.octadiene
ring.polycycle_bicyclo_.5.4.1.dodecane
ring.polycycle_bicyclo_propene
ring.polycycle_spiro_.2.2.pentane
ring.polycycle_spiro_.2.5.octane
ring.polycycle_spiro_.4.5.decane
ring.polycycle_spiro_1_4.dioxaspiro.4.5.decane
ring.polycycle_tricyclo_.3.5.5._cyclopropa.cd.pentalene
ring.polycycle_tricyclo_.3.7.7.bullvalene
ring.polycycle_tricyclo_.3.7.7.semibullvalene
ring.polycycle_tricyclo_adamantane
ring.polycycle_tricyclo_benzvalene
