# Supplementary material for: High-throughput screening of chemicals as functional substitutes using structure-based classification models
Source: Royal Society of Chemistry journal article supplement (doi:10.1039/c6gc02744j), 2016-12-20
Supplement: c6gc02744j4.xlsx [file c6gc02744j4.xlsx]

## Sheet: SI Table 3
casrn	molecular_weight	vapor_pressure_units(Pa)	water_solubility_units(mg/L)	persistence_units(hr)	sediment_half_life_units(hr)	soil_half_life_units(hr)	water_half_life_units(hr)	air_half_life_units(hr)	henrys_law_constant_units(atm-m3/mol)	logKoa_unitless	logP_unitless
50-00-0	30.03	465000	57020	391	3240	720	360	27.4	53.36	5.211	0.35
50-01-1	95.53	0.000317	1000000	680	3240	720	360	6.11	3.03e-08	10.006	-6.13
50-14-6	396.66	8.46e-08	1.259e-05	1080	8100	1800	900	0.1	2.663	12.4	10.44
50-21-5	90.08	3.81	1000000	324	1870	416	208	43.4	0.0003435	4.758	-0.65
50-69-1	150.13	0.000129	1000000	414	1870	416	208	4.15	1.93e-08	8.767	-2.43
50-70-4	182.18	1.75e-07	1000000	126	503	112	55.9	5.14	3.18e-11	7.428	-3.01
50-81-7	176.13	2.38e-08	1000000	271	1870	416	208	3.87	4.2e-12	3.929	-1.88
50-89-5	242.23	1.81e-11	7962	640	3240	720	360	2.78	5.52e-13	14.376	-0.64
50-99-7	180.16	1.78e-05	1000000	414	1870	416	208	2.46	3.2e-09	9.161	-2.89
51-03-6	338.45	0.000696	0.6384	1630	8100	1800	900	2.4	0.369	13.19	4.29
51-35-4	131.13	1.88e-07	394700	391	1870	416	208	2.9	6.25e-11	8.373	-2.69
51-67-2	137.18	0.0329	616900	778	3240	720	360	3.49	7.32e-06	9.322	0.86
51-78-5	145.59	1.56e-07	1000000	760	3240	720	360	35.3	2.27e-11	12.034	-3.09
52-51-7	199.99	0.000808	62850	587	3240	720	360	194	2.57e-06	8.625	-0.64
52-89-1	157.62	8.98e-06	1000000	615	3240	720	360	4.38	1.42e-09	12.737	-2.96
52-90-4	121.15	8.98e-05	113200	396	1870	416	208	3.22	9.6e-08	6.174	-3.05
54-11-5	162.24	4.26	1000000	1610	8100	1800	900	2.82	0.0006922	8.081	1
54-12-6	204.23	2.59e-07	2848	771	3240	720	360	1.07	1.86e-08	11.032	-1.22
54-21-7	160.11	4.84e-09	1000000	472	3240	720	360	8.41	7.75e-13	4.803	-1.49
54-28-4	416.69	3.71e-06	1.07e-06	1650	13000	2880	1440	1.11	1445	15.511	11.63
54-47-7	247.15	1.22e-08	11930	1150	8100	1800	900	5.98	2.53e-10	17.792	0.37
55-55-0	280.3	5.36e-07	160.1	1820	8100	1800	900	1.38	9.38e-07	14.081	2.34
55-56-1	505.46	1.59e-12	564.5	14000	38900	8640	4320	0.845	1.42e-12	28.415	4.85
56-12-2	103.12	1.55e-05	496400	398	1870	416	208	7.44	3.21e-09	5.222	-3.6
56-18-8	131.22	11.5	1000000	749	3240	720	360	1.7	0.001508	9.5	-1.15
56-35-9	596.12	0.00104	0.08958	690	1870	416	208	3.01	6.92	8.748	4.05
56-37-1	227.78	1.88e-06	223800	1870	8100	1800	900	6.4	1.91e-09	9.492	-1
56-40-6	75.07	1.09e-05	625600	385	1870	416	208	9.16	1.31e-09	4.129	-3.41
56-41-7	89.09	3.57e-06	359000	382	1870	416	208	7.29	8.87e-10	4.255	-2.99
56-45-1	105.09	3.96e-06	402000	391	1870	416	208	6.06	1.04e-09	8.581	-3.46
56-65-5	507.19	2.74e-09	38450	1150	8100	1800	900	0.994	3.62e-11	37.869	-3.61
56-69-9	220.23	3.39e-09	31500	774	3240	720	360	1.07	2.38e-11	14.375	-1.7
56-81-5	92.1	0.0106	1000000	346	1870	416	208	13.7	9.8e-07	4.39	-1.65
56-84-8	133.1	3.5e-05	1000000	409	1870	416	208	6.49	4.65e-09	8.453	-4.32
56-85-9	146.15	4.47e-05	42210	640	3240	720	360	5.64	1.55e-07	10.27	-4.49
56-86-0	147.13	0.000146	941600	420	1870	416	208	6.27	2.29e-08	8.531	-3.83
56-87-1	146.19	6.13e-07	270000	414	1870	416	208	3.47	3.32e-10	7.783	-2.99
56-89-3	240.29	3.49e-08	1000000	451	1870	416	208	0.804	8.39e-12	11.611	-4.34
56-93-9	185.7	3.08e-06	1000000	772	3240	720	360	14.8	5.72e-10	8.691	-2.47
56-95-1	505.46	1.59e-12	564.5	14000	38900	8640	4320	0.845	1.42e-12	28.415	4.85
57-00-1	131.14	0.00148	1000000	394	1870	416	208	2.69	1.94e-07	8.446	-3.72
57-06-7	99.15	487	1730	255	3240	720	360	6.68	27.89	4.156	2.15
57-08-9	173.21	0.0015	21250	640	3240	720	360	16.1	1.228e-05	11.155	0.52
57-09-0	364.46	5.35e-09	9.651	1970	8100	1800	900	7.51	2.02e-07	11.203	3.18
57-10-3	256.43	0.00736	0.04073	284	1870	416	208	13.1	46.33	10.257	6.96
57-11-4	284.49	0.00111	0.003512	493	3240	720	360	11.4	89.75	12.941	7.94
57-13-6	60.06	27.8	425900	603	3240	720	360	128	0.003911	8.038	-1.56
57-15-8	177.46	12.2	3385	995	13000	2880	1440	219	0.6416	6.979	2.09
57-48-7	180.16	2.55e-06	1000000	640	3240	720	360	3.72	4.59e-10	10.851	-1.55
57-50-1	342.3	4.71e-14	1000000	414	1870	416	208	2.24	1.61e-17	16.038	-4.27
57-55-6	76.1	14.8	811100	364	1870	416	208	21.4	0.001388	5.358	-0.78
57-87-4	396.66	1.39e-07	0.0002843	2450	13000	2880	1440	0.101	0.1935	11.031	8.86
57-88-5	386.67	2.39e-05	0.0004127	2330	13000	2880	1440	1.29	22.36	10.906	8.74
58-08-2	194.19	9.77e-07	2632	639	3240	720	360	13.2	7.21e-08	8.765	0.16
58-27-5	172.18	0.0192	793.8	755	3240	720	360	11.6	0.004164	9.098	2.21
58-55-9	180.17	7.43e-08	2912	640	3240	720	360	13.3	4.6e-09	10.123	-0.39
58-56-0	205.64	1.3e-06	1000000	640	3240	720	360	6.33	2.67e-10	14.948	-4.32
58-61-7	267.25	4.38e-13	8228	640	3240	720	360	1.08	1.43e-14	19.233	-1.38
58-63-9	268.23	6.27e-16	56910	640	3240	720	360	2.92	2.95e-18	17.682	-1.84
58-85-5	244.31	1.43e-06	11920	702	3240	720	360	6.49	2.92e-08	14.729	0.39
58-86-6	150.13	0.0001	1000000	396	1870	416	208	3.45	1.5e-08	5.326	-1.98
58-89-9	290.83	0.0674	4.044	4520	38900	8640	4320	1830	4.852	7.817	4.26
58-95-7	472.76	5.37e-06	3.65e-08	4500	38900	8640	4320	1.34	69530	14.035	12.26
58-96-8	244.21	1.31e-12	61220	640	3240	720	360	3.31	5.23e-15	14.958	-1.86
59-02-9	430.72	1.8e-06	2.98e-07	4540	38900	8640	4320	1.11	2603	16.017	12.18
59-23-4	180.16	2.16e-06	1000000	409	1870	416	208	3.02	3.89e-10	6.189	-2.43
59-30-3	441.41	8.23e-18	20640	1810	8100	1800	900	3.02	1.76e-19	28.028	-2.81
59-50-7	142.59	1.37	699.3	1030	8100	1800	900	10	0.28	7.099	2.7
59-51-8	149.21	7.79e-05	25740	412	1870	416	208	5	4.51e-07	7.194	-2.41
59-56-3	260.14	2.74e-09	1000000	414	1870	416	208	0.729	7.15e-13	17.655	-3.79
59-67-6	123.11	0.0125	48150	632	3240	720	360	391	3.191e-05	8.596	0.69
60-00-4	292.25	5.03e-10	228200	461	1870	416	208	1.41	6.44e-13	9.767	-3.86
60-01-5	302.37	0.175	17.74	785	3240	720	360	19.2	2.977	9.717	3.31
60-09-3	197.24	0.000702	20.46	1660	8100	1800	900	5.91	0.00676	10.082	3.19
60-12-8	122.17	3.24	21990	482	3240	720	360	25.3	0.018	6.34	1.57
60-18-4	181.19	2.47e-07	97100	732	3240	720	360	3.21	4.6e-10	10.252	-1.76
60-27-5	113.12	0.000163	165600	612	3240	720	360	3.34	1.11e-07	8.245	-1.21
60-29-7	74.12	71900	23240	118	3240	720	360	19.6	229.2	2.189	1.05
60-33-3	280.45	0.00765	0.03771	482	3240	720	360	0.691	56.91	9.843	7.51
60-51-5	229.25	0.0055	6626	646	3240	720	360	3.25	0.00019	8.783	0.72
60-57-1	380.91	0.000365	0.1455	5100	38900	8640	4320	27.8	0.9563	8.588	5.45
60-81-1	436.42	2.32e-16	1678	776	3240	720	360	0.962	6.03e-17	26.606	0.72
60-82-2	274.28	1.68e-09	66.62	1960	8100	1800	900	1.25	6.92e-09	17.608	3.51
60-92-4	329.21	2.92e-10	136400	1150	8100	1800	900	0.886	7.05e-13	22.963	-2.36
61-19-8	347.23	1.9e-10	8510	1150	8100	1800	900	0.995	7.78e-12	27.708	-1.68
61-90-5	131.18	7.35e-07	15380	373	1870	416	208	6.07	6.28e-09	5.326	-1.59
62-38-4	336.74	0.021	1843	1490	8100	1800	900	129	0.003824	8.346	0.89
62-44-2	179.22	0.364	2485	1420	8100	1800	900	14.6	0.02625	9.64	1.67
62-53-3	93.13	105	20820	427	3240	720	360	2.29	0.4717	4.983	1.08
62-56-6	76.12	7.81	554200	611	3240	720	360	6.11	0.001071	6.012	-1.31
62-76-0	134	2.55e-06	1000000	395	1870	416	208	100000	3.41e-10	2.003	-7
63-25-2	201.23	0.00711	416.2	1690	8100	1800	900	9.87	0.003436	9.234	2.35
63-42-3	342.3	1.56e-14	1000000	414	1870	416	208	1.66	5.34e-18	11.827	-5.03
63-68-3	149.21	7.79e-05	25740	412	1870	416	208	5	4.51e-07	7.194	-2.41
63-91-2	165.19	3.49e-05	9357	720	3240	720	360	5.81	6.17e-07	6.869	-1.28
64-02-8	380.17	1.99e-10	1000000	461	1870	416	208	1.56	7.55e-14	8.147	-13.17
64-04-0	121.18	54.5	63250	496	3240	720	360	6.81	0.1045	5.889	1.34
64-17-5	46.07	8120	792100	249	1870	416	208	78.5	0.4722	3.379	-0.14
64-18-6	46.03	4780	955200	335	1870	416	208	570	0.2306	4.626	-0.46
64-19-7	60.05	2290	475900	348	1870	416	208	347	0.2894	5.218	0.09
65-23-6	169.18	1.57e-05	282000	640	3240	720	360	8.4	9.44e-09	12.498	-0.56
65-45-2	137.14	4	26400	677	3240	720	360	7.89	0.02078	9.206	1.03
65-46-3	243.22	1.17e-09	175700	640	3240	720	360	2.06	1.61e-12	14.683	-2.46
65-71-4	126.12	2.03e-06	15780	621	3240	720	360	8.28	1.63e-08	7.635	-0.32
65-82-7	191.25	0.000653	51120	640	3240	720	360	9.65	2.44e-06	11.523	-0.03
65-85-0	122.12	0.397	2493	621	3240	720	360	207	0.01946	7.678	1.87
65-86-1	156.1	2.22e-08	17860	640	3240	720	360	24.4	1.93e-10	11.65	-0.11
66-22-8	112.09	1.91e-06	42990	584	3240	720	360	24.7	4.97e-09	6.037	-0.87
66-25-1	100.16	1280	3527	153	1870	416	208	8.1	36.23	3.84	1.8
66-84-2	215.64	1.73e-11	1000000	414	1870	416	208	2.7	3.74e-15	13.113	-7.42
67-03-8	286.78	1.72e-08	1000000	1770	8100	1800	900	14.1	4.93e-12	18.728	-4.42
67-43-6	393.35	1.61e-14	443300	470	1870	416	208	0.93	1.43e-17	23.422	-4.91
67-47-0	126.11	0.704	364300	580	3240	720	360	4.8	0.0002437	7.565	-0.09
67-52-7	128.09	7.46e-08	1000000	587	3240	720	360	102	9.56e-12	9.854	-1.25
67-56-1	32.04	15800	1000000	261	1870	416	208	272	0.5083	2.96	-0.63
67-63-0	60.1	6610	402400	346	3240	720	360	50.6	0.9876	3.53	0.28
67-64-1	58.08	33200	219900	336	3240	720	360	1170	8.768	2.604	-0.24
67-66-3	119.38	25100	2096	189	8100	1800	900	2490	1435	2.794	1.52
67-68-5	78.13	82.9	1000000	573	3240	720	360	4.14	0.006479	5.859	-1.22
67-71-0	94.13	0.981	1000000	364	3240	720	360	121	9.224e-05	2.183	-1.11
68-04-2	258.07	2.79e-10	120000	414	1870	416	208	110	5.99e-13	15.183	-0.28
68-11-1	92.11	55.3	255800	320	1870	416	208	6.67	0.01992	6.191	0.03
68-26-8	286.46	3.08e-05	0.6713	1180	8100	1800	900	0.306	0.01314	8.004	7.62
68-95-1	157.17	0.0313	72620	640	3240	720	360	10.2	6.781e-05	9.575	-0.02
69-65-8	182.18	1.75e-07	1000000	126	503	112	55.9	5.14	3.18e-11	7.428	-3.01
69-72-7	138.12	0.00425	3808	646	3240	720	360	19.7	0.0001543	8.783	2.24
69-79-4	342.3	1.56e-14	1000000	414	1870	416	208	1.66	5.34e-18	11.827	-5.03
69-89-6	152.11	3.51e-08	15280	640	3240	720	360	4.69	3.5e-10	11.087	-1.15
69-93-2	168.11	1.05e-07	219200	640	3240	720	360	18.4	8.07e-11	13.139	-1.46
70-18-8	307.32	1.19e-11	192700	652	3240	720	360	2.03	1.89e-14	15.291	-5.41
70-26-8	132.16	1.11e-05	1000000	404	1870	416	208	3.53	1.47e-09	6.735	-3.48
70-30-4	406.91	1.11e-08	0.003837	12200	38900	8640	4320	118	0.001175	17.994	6.92
70-47-3	132.12	2.26e-05	68770	587	3240	720	360	3.33	4.35e-08	10.212	-4.99
70-54-2	146.19	6.13e-07	270000	414	1870	416	208	3.47	3.32e-10	7.783	-2.99
70-55-3	171.22	0.0128	12100	1090	8100	1800	900	210	0.0001804	5.54	0.92
71-00-1	155.16	3.24e-07	419300	640	3240	720	360	1.99	1.2e-10	8.144	-3.22
71-23-8	60.1	3090	271500	348	3240	720	360	46.4	0.6847	3.769	0.35
71-30-7	111.1	0.000278	158600	754	3240	720	360	4.47	1.95e-07	6.976	-1.47
71-36-3	74.12	1040	76700	240	1870	416	208	30	1.002	4.323	0.84
71-41-0	88.15	353	20890	239	1870	416	208	23.1	1.491	4.785	1.33
71-43-2	78.11	11600	2000	197	8100	1800	900	209	454	2.774	1.99
71-44-3	202.35	6.66e-05	1000000	781	3240	720	360	1.08	1.35e-08	13.248	-0.68
71-55-6	133.41	14900	666.1	179	13000	2880	1440	27500	2991	2.643	2.68
71-91-0	210.16	2.16e-06	1000000	1650	8100	1800	900	7.25	4.54e-10	6.556	-2.22
72-17-3	112.06	2.03e-06	1000000	337	1870	416	208	106	2.27e-10	0.562	-4.77
72-18-4	117.15	1.22e-06	74460	375	1870	416	208	6.28	1.92e-09	4.709	-2.08
72-19-5	119.12	1.05e-06	279000	391	1870	416	208	5.48	4.49e-10	8.589	-3.04
72-43-5	345.66	0.00556	0.302	5530	38900	8640	4320	4.79	6.363	10.161	5.67
72-48-0	240.22	9.54e-09	15.79	1940	8100	1800	900	26.1	1.45e-07	14.912	3.16
73-22-3	204.23	2.59e-07	2848	771	3240	720	360	1.07	1.86e-08	11.032	-1.22
73-24-5	135.13	3.27e-07	4739	742	3240	720	360	1.28	9.31e-09	12.452	-0.73
73-31-4	232.28	1.83e-05	1164	1830	8100	1800	900	1.21	3.65e-06	13.63	1.65
73-32-5	131.18	1.07e-06	22790	377	1870	416	208	6.03	6.16e-09	5.126	-1.59
73-40-5	151.13	2.2e-10	21990	640	3240	720	360	4.11	1.51e-12	14.06	-1.05
74-31-7	260.34	7.65e-05	7.353	2290	8100	1800	900	1.28	0.00271	12.117	4.04
74-79-3	174.2	1.78e-06	1000000	641	3240	720	360	1.89	3.09e-10	11.926	-4
74-83-9	94.94	212000	11640	151	3240	720	360	6390	826.4	1.713	1.18
74-84-0	30.07	2700000	938.6	139	3240	720	360	958	3246	0.499	1.32
74-85-1	28.05	4190000	3449	84.4	3240	720	360	25.3	824.1	0.161	1.27
74-87-3	50.49	542000	22620	149	3240	720	360	5890	226.2	1.353	1.09
74-89-5	31.06	307000	1000000	352	3240	720	360	11.7	3.147	2.773	-0.64
74-93-1	48.1	202000	29180	88.7	3240	720	360	7.8	167	1.674	0.78
74-98-6	44.1	819000	368.9	125	3240	720	360	223	12110	0.899	1.81
75-01-4	62.5	363000	5631	92.8	3240	720	360	35.7	1125	1.564	1.62
75-04-7	45.08	20400	1000000	363	3240	720	360	9.26	0.9196	3.169	-0.15
75-07-0	44.05	121000	256800	257	3240	720	360	16.2	17.38	2.224	-0.17
75-08-1	62.13	69400	11340	84.4	3240	720	360	5.48	379.8	2.002	1.27
75-09-2	84.93	57500	10950	186	8100	1800	900	1810	446.7	2.127	1.34
75-13-8	43.03	133000	81730	248	3240	720	360	100000	53.35	2.003	0.24
75-15-0	76.13	45600	2928	149	3240	720	360	100000	1186	2.17	1.94
75-18-3	62.13	63800	22490	138	3240	720	360	53.3	176.4	2.102	0.92
75-21-8	44.05	167000	237400	266	3240	720	360	3380	18.8	1.918	-0.05
75-25-2	252.73	712	203.8	307	8100	1800	900	6030	882.9	4.06	1.79
75-27-4	163.83	7650	1287	207	8100	1800	900	3270	974.2	3.062	1.61
75-28-5	58.12	345000	175.1	113	3240	720	360	110	33630	1.073	2.23
75-31-0	59.11	78900	838100	335	3240	720	360	6.52	5.567	2.994	0.27
75-33-2	76.16	35400	4835	88.6	3240	720	360	6.11	556.5	2.405	1.68
75-34-3	98.96	29100	3486	176	8100	1800	900	937	828.9	2.429	1.76
75-35-4	96.94	80100	1810	105	8100	1800	900	23.5	4291	2.102	2.12
75-37-6	66.05	514000	5656	148	3240	720	360	7550	1183	0.831	1.13
75-45-6	86.47	876000	2748	146	3240	720	360	54800	3188	0.86	0.89
75-47-8	393.73	3.16	8.583	693	8100	1800	900	889	144.9	5.933	3.03
75-50-3	59.11	224000	1000000	248	3240	720	360	3.67	5.989	2.531	0.04
75-52-5	61.04	4760	111200	374	3240	720	360	1970	2.613	2.582	-0.04
75-56-9	58.08	70900	129300	313	3240	720	360	494	31.86	2.576	0.37
75-57-0	109.6	1.61e-06	1000000	632	3240	720	360	50.7	1.77e-10	5.588	-4.18
75-65-0	74.12	6250	217500	364	3240	720	360	229	2.131	3.782	0.73
75-66-1	90.18	22400	1855	89	3240	720	360	7.75	1089	2.742	2.14
75-68-3	100.5	343000	372.9	167	8100	1800	900	83900	27310	1.669	2.05
75-75-2	96.1	3.56	1000000	576	3240	720	360	930	0.0003421	3.908	-2.38
75-85-4	88.15	2360	70700	348	3240	720	360	52.5	2.942	4.139	1.22
75-91-2	90.12	5080	19650	443	3240	720	360	85.6	23.3	4.124	0.94
75-94-5	161.49	7180	647.7	106	3240	720	360	9.19	1788	3.018	2.36
76-06-2	164.38	2970	436.8	227	13000	2880	1440	1970	1119	3.167	1.32
76-09-5	118.18	20.1	35060	690	8100	1800	900	109	0.06786	5.32	0.54
76-22-2	152.24	1.42	339.1	744	8100	1800	900	26	0.6405	5.22	3.04
76-44-8	373.32	0.0317	0.09526	4820	38900	8640	4320	1.04	124.4	7.39	5.86
76-49-3	196.29	14.3	9.721	897	8100	1800	900	18.5	288.1	6.048	3.86
76-50-6	238.37	2.43	0.8885	938	8100	1800	900	23.8	651	6.64	5.26
76-59-5	624.39	9.3e-15	8.83e-06	13800	38900	8640	4320	15.2	6.58e-07	24.197	8.99
76-60-8	698.02	3.82e-15	2.66e-05	14000	38900	8640	4320	59.1	1e-07	24.443	7.86
76-78-8	388.46	1.9e-08	566.3	1930	13000	2880	1440	0.388	1.3e-08	10.201	0.94
76-86-8	294.86	0.00125	0.03618	2530	8100	1800	900	43.9	10.17	9.725	6.51
76-87-9	367.04	1.53e-06	4.721	3060	8100	1800	900	42.9	0.0001182	8.289	3.47
76-93-7	228.25	3.01e-06	2714	730	3240	720	360	27.7	2.53e-07	9.943	2.24
77-42-9	220.36	0.00983	4.188	1030	8100	1800	900	0.457	0.517	8.167	5.18
77-48-5	285.92	6.12e-05	4645	779	8100	1800	900	83.9	3.77e-06	3.64	-0.94
77-52-1	456.72	4.65e-12	0.001876	6600	38900	8640	4320	1.31	1.13e-06	15.323	7.92
77-53-2	222.37	0.0165	21.88	1610	13000	2880	1440	12.7	0.168	7.632	4.33
77-54-3	264.41	0.0686	0.5502	1640	13000	2880	1440	21.5	33	6.819	5.33
77-58-7	631.57	5.94e-07	0.2158	1250	3240	720	360	4.72	0.00174	2.302	10.64
77-62-3	420.64	4.38e-11	6.43e-06	7680	38900	8640	4320	4.73	0.002871	19.426	10.69
77-71-4	128.13	0.000181	11770	1020	8100	1800	900	83.9	1.97e-06	6.466	-0.27
77-74-7	102.18	820	12860	350	3240	720	360	31.7	6.515	4.853	1.71
77-83-8	206.24	0.423	111.3	1130	8100	1800	900	38.4	0.7831	7.929	3
77-85-0	120.15	0.00022	181600	541	3240	720	360	20.3	1.46e-07	6.039	-0.3
77-86-1	121.14	0.000304	1000000	587	3240	720	360	7.67	3.68e-08	8.89	-1.56
77-89-4	318.33	0.0272	688.2	790	3240	720	360	44.7	0.01258	9.889	1.34
77-90-7	402.49	0.000607	0.6464	561	1870	416	208	17.8	0.3777	12.101	4.29
77-92-9	192.13	7.52e-07	1000000	414	1870	416	208	36.6	1.45e-10	10.112	-1.67
77-93-0	276.29	0.0264	28240	664	3240	720	360	35	0.0002583	7.134	0.33
77-94-1	360.45	3.31e-05	27.37	443	1870	416	208	16	0.0004354	10.124	3.28
77-95-2	192.17	2.15e-07	1000000	413	1870	416	208	6.32	4.13e-11	7.058	-2.45
77-99-6	134.18	0.00563	1000000	591	3240	720	360	18.6	7.55e-07	8.009	0.19
78-04-6	347	4.34e-05	17.37	371	3240	720	360	7.94	0.0008656	5.61	3.01
78-07-9	192.33	359	3765	437	3240	720	360	13	18.39	3.249	1.29
78-08-0	190.32	96.1	5040	437	3240	720	360	5.53	3.63	3.239	1.16
78-10-4	208.33	221	36910	1110	8100	1800	900	10.4	1.242	3.134	0.04
78-21-7	465.74	1.63e-13	0.006364	2970	8100	1800	900	2.23	1.19e-08	20.007	6.17
78-33-1	494.62	2.74e-06	9.62e-07	5890	38900	8640	4320	17.7	1413	14.983	10.43
78-35-3	224.35	11	0.9804	509	8100	1800	900	0.494	2511	6.203	5.3
78-36-4	224.35	1.68	0.8485	543	8100	1800	900	0.493	444.2	6.273	5.37
78-37-5	284.4	0.00357	0.05483	1250	8100	1800	900	0.466	18.53	9.146	6.37
78-40-0	182.16	22	11150	522	3240	720	360	4.64	0.3594	6.632	0.87
78-42-2	434.65	8.09e-05	1.461e-05	318	1870	416	208	2.62	2408	14.983	9.49
78-43-3	430.91	3.04e-05	1.505	7980	38900	8640	4320	11.6	0.008703	10.622	3.65
78-51-3	398.48	0.000165	1.963	466	1870	416	208	1.99	0.03329	13.059	3
78-59-1	138.21	33.2	3010	823	8100	1800	900	1.72	1.524	5.266	2.62
78-62-6	148.28	2720	23260	289	3240	720	360	20.3	17.34	1.678	1.57
78-63-7	290.45	1.27	0.03524	5300	38900	8640	4320	57	10450	7.529	6.55
78-67-1	164.21	0.187	1512	962	13000	2880	1440	384	0.02027	4.871	2.87
78-69-3	158.29	9.51	188.9	718	8100	1800	900	18	7.966	6.25	3.6
78-70-6	154.25	11.1	683.7	792	8100	1800	900	0.457	2.503	6.026	3.38
78-78-4	72.15	91800	184.6	102	3240	720	360	65.8	35850	0.962	2.72
78-81-9	73.14	18600	325300	397	3240	720	360	7.46	4.197	3.985	0.76
78-83-1	74.12	1780	97120	346	3240	720	360	37.3	1.363	4.158	0.77
78-84-2	72.11	21900	31240	190	3240	720	360	9.76	50.47	2.873	0.74
78-87-5	112.99	6050	2166	207	8100	1800	900	581	315.7	2.918	2.25
78-92-2	74.12	2740	130400	343	3240	720	360	26.7	1.561	4.041	0.77
78-93-3	72.11	13100	76100	314	3240	720	360	223	12.44	2.923	0.26
78-94-4	70.09	12200	60630	291	3240	720	360	11	14.07	3.131	0.41
78-96-6	75.11	102	1000000	591	3240	720	360	6.36	0.007691	6.74	-1.19
78-98-8	72.06	16200	1000000	380	3240	720	360	14.9	1.162	3.457	-1.5
79-01-6	131.39	9660	778.7	147	8100	1800	900	109	1631	2.815	2.47
79-07-2	93.51	1.41	345700	613	3240	720	360	113	0.0003823	6.263	-0.58
79-09-4	74.08	806	173600	298	1870	416	208	210	0.3436	5.07	0.58
79-10-7	72.06	802	168000	262	1870	416	208	22.6	0.3443	5.17	0.44
79-11-8	94.5	32.9	195300	581	3240	720	360	326	0.01593	6.642	0.34
79-14-1	76.05	2.27	1000000	337	1870	416	208	82.5	0.0001724	4.347	-1.07
79-20-9	74.08	7030	93900	277	3240	720	360	753	5.543	2.508	0.37
79-21-0	76.05	3240	1000000	368	3240	720	360	63.5	0.2464	2.988	-1.07
79-31-2	88.11	436	49180	277	1870	416	208	128	0.7811	5.382	1
79-33-4	90.08	3.81	1000000	324	1870	416	208	43.4	0.0003435	4.758	-0.65
79-41-4	86.09	291	50700	247	1870	416	208	8.77	0.4935	5.73	0.99
79-42-5	106.14	37.3	115200	306	1870	416	208	5.76	0.03439	6.427	0.45
79-62-9	428.75	1.09e-08	3.37e-06	4680	38900	8640	4320	1.19	1.392	12.604	10.88
79-63-0	426.73	2.46e-08	4.11e-06	4560	38900	8640	4320	0.367	2.55	12.498	10.79
79-69-6	206.33	1.96	3.845	891	8100	1800	900	0.458	105.2	6.718	4.71
79-70-9	206.33	1.65	2.98	894	8100	1800	900	0.233	114.5	6.865	4.84
79-74-3	250.38	3.76e-05	0.9327	2210	8100	1800	900	4	0.01009	13.383	5.83
79-76-5	192.3	3.26	8.831	887	8100	1800	900	1.91	71.13	6.574	4.37
79-77-6	192.3	3.03	25.16	936	8100	1800	900	0.233	23.13	6.321	4.42
79-78-7	232.37	0.364	0.4591	964	8100	1800	900	0.434	184.2	7.52	5.63
79-81-2	524.88	1.53e-07	2.84e-11	1060	8100	1800	900	0.3	2836000	14.296	15.51
79-83-4	219.24	6.85e-07	972100	640	3240	720	360	11.4	1.55e-10	11.065	-1.69
79-89-0	206.33	0.896	2.309	877	8100	1800	900	0.0438	80.06	6.922	4.97
79-92-5	136.24	237	6.275	101	8100	1800	900	4.74	5152	3.402	4.35
79-94-7	543.88	4.61e-09	0.001002	11400	38900	8640	4320	86.8	0.002504	18.225	7.2
80-04-6	240.39	6.76e-05	3.444	465	3240	720	360	6.47	0.004718	8.934	4.55
80-05-7	228.29	3.03e-05	172.7	2220	8100	1800	900	3.18	4.001e-05	12.747	3.64
80-08-0	248.3	3.57e-06	3589	1740	8100	1800	900	5.58	2.47e-07	12.866	0.77
80-09-1	250.27	6.29e-08	3518	788	3240	720	360	17.7	4.48e-09	14.607	1.65
80-10-4	253.2	0.0807	1.089	1210	8100	1800	900	65.8	18.75	7.603	5.06
80-15-9	152.19	9.27	1071	1560	8100	1800	900	29.7	1.317	7.875	2.16
80-25-1	198.31	9.13	7.462	696	8100	1800	900	20.1	242.7	5.813	4.42
80-26-2	196.29	6.63	18.97	884	8100	1800	900	0.517	68.56	5.336	4.34
80-27-3	210.32	2.21	2.913	912	8100	1800	900	0.517	159.8	6.085	4.83
80-33-1	303.16	0.00025	2.961	2160	13000	2880	1440	39.1	0.02566	9.384	4.21
80-39-7	199.27	0.0147	1106	998	8100	1800	900	25.5	0.002666	6.125	1.87
80-43-3	270.37	0.001	0.3653	3470	13000	2880	1440	27.7	0.7411	8.243	5.88
80-46-6	164.25	0.155	113.2	1080	8100	1800	900	6.15	0.2244	8.015	3.91
80-51-3	358.39	8.9e-10	4733	1820	8100	1800	900	122	6.73e-11	15.368	0.08
80-53-5	172.27	0.0276	625	671	8100	1800	900	10.5	0.007607	6.963	2.32
80-54-6	204.31	0.477	7.859	999	8100	1800	900	7.77	12.41	7.352	4.36
80-56-8	136.24	536	4.071	92.4	8100	1800	900	1.94	17940	3.36	4.27
80-57-9	150.22	18.2	943.4	819	8100	1800	900	1.71	2.887	5.031	3.21
80-59-1	100.12	59.7	18450	239	1870	416	208	2.56	0.3241	5.938	1.4
80-62-6	100.12	4890	7747	175	3240	720	360	7.01	63.23	3.265	1.28
80-68-2	119.12	1.05e-06	279000	391	1870	416	208	5.48	4.49e-10	8.589	-3.04
80-71-7	112.13	0.114	8501	283	3240	720	360	1.5	0.001498	4.134	1.29
80-73-9	114.15	16.6	9554	602	3240	720	360	28.1	0.1991	6.506	-0.31
80-97-7	388.68	7.3e-08	0.0003391	2470	13000	2880	1440	5.35	0.08359	11.002	8.82
81-07-2	183.18	1.37e-05	789.2	636	3240	720	360	43.7	3.19e-06	8.209	0.45
81-10-7	276.36	6.36e-06	74.84	1680	8100	1800	900	5.8	2.348e-05	9.788	2.75
81-13-0	205.26	1.96e-06	1000000	639	3240	720	360	9.62	4.02e-10	7.021	-1.92
81-14-1	294.31	7.78e-05	1.148	2870	13000	2880	1440	199	0.01996	12.007	4.31
81-15-2	297.27	8.47e-05	0.8214	9120	38900	8640	4320	309	0.03064	11.821	4.45
81-16-3	223.25	5.88e-08	3237	1690	8100	1800	900	5.83	4.06e-09	10.29	-0.91
81-33-4	390.36	4.4e-21	0.169	9190	38900	8640	4320	14	1.02e-17	22.884	3.76
81-42-5	307.14	8.08e-09	0.1104	2910	13000	2880	1440	17.5	2.248e-05	18.61	4.45
81-48-1	329.36	1.44e-09	0.003024	2340	8100	1800	900	1.28	0.0001568	17.676	6.24
81-49-2	381.02	1.92e-07	0.009132	2980	13000	2880	1440	208	0.00801	16.448	5.31
81-55-0	330.21	3.55e-12	0.22	3230	13000	2880	1440	73.8	5.32e-09	18.19	4.73
81-63-0	242.28	1.74e-05	92600	1900	8100	1800	900	1.49	4.54e-08	15.329	0.54
81-64-1	240.22	9.49e-08	3.426	1510	8100	1800	900	26.1	6.66e-06	9.426	3.94
81-77-6	442.43	1.25e-16	3.242e-05	6190	13000	2880	1440	1.38	1.71e-09	27.608	7.73
82-18-8	446.47	4.33e-16	0.0001784	3000	13000	2880	1440	19.6	1.08e-09	23.805	6.83
82-38-2	237.26	4.08e-05	0.6801	1530	8100	1800	900	13.9	0.01423	10.016	4.07
82-43-9	277.11	4.78e-05	0.1427	3090	13000	2880	1440	244	0.09269	11.775	4.63
82-45-1	223.23	2.54e-06	1.643	1540	8100	1800	900	6.1	0.000346	10.438	3.53
82-47-3	319.31	9.88e-15	35360	1850	8100	1800	900	7.87	8.92e-17	19.433	-2.33
82-75-7	223.25	7.01e-08	1965	1690	8100	1800	900	5.83	7.97e-09	10.54	-0.91
82-76-8	299.35	3.12e-10	9.436	1810	8100	1800	900	1.3	9.9e-09	13.018	1.31
83-08-9	273.29	3.15e-07	5.516	1900	8100	1800	900	8.86	1.565e-05	15.702	4.21
83-34-1	131.18	0.307	547.6	463	3240	720	360	1.28	0.07346	6.998	2.6
83-38-5	175.02	1.81	159.8	674	8100	1800	900	14.9	1.986	6.521	3
83-40-9	152.15	0.00152	1019	631	3240	720	360	16.1	0.0002269	9.053	2.79
83-46-5	414.72	5.03e-08	4.632e-05	2010	13000	2880	1440	1.27	0.45	11.569	9.65
83-56-7	160.17	1.68e-05	5725	791	3240	720	360	1.28	4.7e-07	11.573	2.21
83-66-9	268.27	0.00175	2.107	1920	13000	2880	1440	171	0.2224	10.409	4.17
83-67-0	180.17	1.5e-09	12480	566	3240	720	360	13.6	2.18e-11	8.396	-0.05
83-72-7	174.16	6.92e-06	3895	672	3240	720	360	19.5	3.09e-07	8.381	0.78
83-79-4	394.43	9.25e-08	1.045	4900	13000	2880	1440	0.755	3.492e-05	15.439	4.31
83-88-5	376.37	2.89e-19	3702	475	3240	720	360	1.04	2.94e-20	15.373	-1.05
84-54-8	222.25	0.000116	1.234	1920	8100	1800	900	90.4	0.02096	10.733	3.89
84-57-1	323.15	1.95e-10	22.96	1870	13000	2880	1440	183	2.76e-09	12.715	0.69
84-61-7	330.43	0.00061	0.04098	1390	8100	1800	900	10.6	4.924	11.588	6.2
84-65-1	208.22	5.1e-06	3.923	1740	8100	1800	900	171	0.000271	9.407	3.34
84-66-2	222.24	0.339	287.2	508	3240	720	360	74.1	0.262	7.023	2.65
84-69-5	278.35	0.322	5.061	503	3240	720	360	27.7	17.67	8.412	4.46
84-71-9	396.62	0.000745	9.103e-05	488	3240	720	360	8.76	3247	11.625	8.84
84-74-2	278.35	0.0303	2.351	296	1870	416	208	27.7	3.599	8.631	4.61
84-83-3	201.27	0.0514	171.5	944	8100	1800	900	5	0.06024	8.254	2.81
84-86-6	223.25	7.01e-08	1965	1690	8100	1800	900	5.83	7.97e-09	10.54	-0.91
84-87-7	224.23	1.3e-07	295200	755	3240	720	360	15.9	9.88e-11	11.54	-0.47
84-89-9	223.25	7.01e-08	1965	1690	8100	1800	900	5.83	7.97e-09	10.54	-0.91
84-91-3	295.23	1.32e-11	4990	1740	8100	1800	900	937	7.83e-13	12.511	-1.27
85-00-7	344.05	9.56e-07	134500	1950	8100	1800	900	11	2.45e-09	8.416	-2.82
85-19-8	232.67	0.000274	36.09	1290	8100	1800	900	23.8	0.001771	9.202	4.09
85-32-5	363.23	2.74e-09	12990	1150	8100	1800	900	2.13	7.68e-11	30.814	-2
85-42-7	154.17	7.14	1014	352	3240	720	360	37.7	1.084	5.226	2.17
85-43-8	152.15	7.67	1579	339	3240	720	360	1.04	0.7387	5.072	1.96
85-44-9	148.12	0.0296	3326	623	3240	720	360	343	0.001318	7.776	2.07
85-60-9	382.59	7.02e-09	0.0002598	3410	13000	2880	1440	1.24	0.01033	17.484	9.09
85-68-7	312.37	0.00587	0.9489	509	3240	720	360	23.2	1.931	9.018	4.84
85-70-1	336.39	0.00223	2.135	439	1870	416	208	26.4	0.3508	10.225	4.15
85-83-6	380.45	6.1e-10	0.0002033	11200	38900	8640	4320	12.8	0.00114	19.412	8.72
85-86-9	352.4	2.11e-09	0.002593	5300	13000	2880	1440	14	0.0002863	18.408	7.63
85-91-6	165.19	2.78	257	606	3240	720	360	16.9	1.782	8.769	2.81
86-26-0	184.24	0.943	27.7	430	3240	720	360	13.1	6.269	6.839	3.84
86-30-6	198.23	0.0093	94.85	1100	8100	1800	900	10.3	0.01942	7.436	3.16
86-65-7	303.31	9.27e-14	4494	1840	8100	1800	900	26.5	6.25e-15	15.93	-1.85
86-74-8	167.21	5.42e-05	3.274	547	3240	720	360	6.42	0.002764	9.044	3.23
86-75-9	249.27	0.000303	44.66	822	3240	720	360	18.7	0.001697	10.364	3.19
86-87-3	186.21	0.00128	1557	720	3240	720	360	6.93	0.0001526	8.993	2.6
86-92-0	188.23	0.00192	110.9	1250	8100	1800	900	16	0.003259	8.501	3.11
87-02-5	239.25	3.27e-09	15740	1720	8100	1800	900	1.7	4.97e-11	14.043	-1.39
87-05-8	204.23	0.0049	235.2	452	3240	720	360	1.39	0.00426	7.086	2.63
87-18-3	270.33	0.000397	0.8844	1180	8100	1800	900	7.51	0.1214	9.481	5.73
87-19-4	194.23	0.801	67.83	459	3240	720	360	16.6	2.294	7.363	4
87-20-7	208.26	0.0868	21.89	462	3240	720	360	15.2	0.8257	7.729	4.49
87-22-9	242.28	0.000185	7.856	518	3240	720	360	13.7	0.005715	9.501	4.8
87-25-2	165.19	1.37	413.6	637	3240	720	360	7.04	0.5485	8.746	2.76
87-28-5	182.18	0.00289	26810	655	3240	720	360	15.2	1.957e-05	9.674	1.63
87-41-2	134.14	0.148	18360	485	3240	720	360	102	0.001081	4.085	0.71
87-44-5	204.36	4.16	0.05011	207	8100	1800	900	0.0233	16960	4.85	6.3
87-51-4	175.19	0.00028	9016	760	3240	720	360	1.28	5.44e-06	10.937	1.49
87-66-1	126.11	0.00156	53310	771	3240	720	360	1.28	3.69e-06	13.575	0.97
87-69-4	150.09	1.29e-05	1000000	123	503	112	55.9	18.5	1.94e-09	7.268	-1
87-73-0	210.14	3.28e-09	1000000	125	503	112	55.9	7.4	6.89e-13	8.387	-2.51
87-86-5	266.34	0.00144	3.09	7810	38900	8640	4320	466	0.1241	11.119	4.74
87-89-8	180.16	1.77e-08	1000000	125	503	112	55.9	4.11	3.2e-12	8.803	-2.08
87-90-1	232.41	2.16e-06	4610	1330	8100	1800	900	85.6	1.09e-07	9.537	0.94
87-91-2	206.2	0.0345	71920	240	1870	416	208	29.2	9.9e-05	2.722	-0.08
87-99-0	152.15	0.262	1000000	414	1870	416	208	6.49	3.976e-05	6.652	-2.56
88-04-0	156.61	0.24	434.6	1050	8100	1800	900	3.85	0.08648	7.954	3.25
88-09-5	116.16	64.8	9456	265	1870	416	208	48	0.796	5.864	1.98
88-12-0	111.14	17.6	52090	464	3240	720	360	6.61	0.03755	6.016	0.25
88-14-2	112.09	0.761	30410	457	3240	720	360	16.5	0.002806	5.995	1
88-15-3	126.17	24.4	8146	409	3240	720	360	29.2	0.3779	4.912	1.49
88-17-5	161.13	67	591.6	1470	13000	2880	1440	11.9	18.26	5.581	2.04
88-18-6	150.22	7.08	428.9	1020	8100	1800	900	6.32	2.48	6.294	3.42
88-19-7	171.22	0.00807	11630	1100	8100	1800	900	210	0.0001189	5.56	0.92
88-21-1	173.19	2.7e-05	35620	640	3240	720	360	11.1	1.31e-07	8.36	-2.08
88-24-4	368.56	7.8e-08	0.0004124	4440	13000	2880	1440	6.27	0.0697	17.467	8.95
88-27-7	263.43	0.00226	186.2	2940	13000	2880	1440	2.71	0.003188	11.317	4.24
88-40-4	178.28	10.2	7.586	253	8100	1800	900	3.73	240.9	5.96	4.53
88-41-5	198.31	7.1	7.462	609	8100	1800	900	17.7	188.9	5.813	4.42
88-45-9	188.2	6.65e-07	538700	1150	8100	1800	900	6.78	2.32e-10	10.342	-3.55
88-50-6	242.08	1.06e-06	1244	1190	8100	1800	900	52.8	2.07e-07	9.91	-0.79
88-58-4	222.33	6.46e-05	9.145	1950	8100	1800	900	4.14	0.001572	12.649	4.85
88-60-8	164.25	1.07	101.3	1070	8100	1800	900	2.44	1.738	8.154	3.97
88-63-1	188.2	6.65e-07	1000000	1150	8100	1800	900	1.28	1.25e-10	9.242	-3.55
88-64-2	230.24	1.06e-09	5163	1150	8100	1800	900	1.75	4.71e-11	13.4	-2.98
88-69-7	136.2	12	1146	467	3240	720	360	6.04	1.428	7.231	2.97
88-75-5	139.11	6.36	2500	481	3240	720	360	285	0.3539	5.071	1.91
88-76-6	288.71	9.21e-10	6.356	1300	8100	1800	900	157	4.19e-08	11.944	0.05
88-84-6	204.36	1.74	0.01923	201	8100	1800	900	0.104	18420	5.122	6.79
88-99-3	166.13	0.000102	15260	738	3240	720	360	208	1.11e-06	9.817	1.07
89-04-3	546.79	6.93e-10	2.92e-08	329	1870	416	208	8.36	12.96	16.456	11.81
89-25-8	174.2	0.00455	380.9	575	3240	720	360	19.5	0.002085	7.993	2.56
89-29-2	253.28	1.84e-06	3577	1540	8100	1800	900	76.1	1.3e-07	10.479	0.94
89-32-7	218.12	0.000634	519.1	1270	8100	1800	900	892	0.0002661	8.655	2.14
89-33-8	232.24	0.000206	473.7	723	3240	720	360	17.5	0.0001013	8.857	2.1
89-36-1	254.26	4.29e-09	35.41	657	3240	720	360	73.1	3.08e-08	11.164	-0.6
89-43-0	305.42	6.5e-06	3.603	1730	8100	1800	900	16.1	0.0005515	10.923	4.1
89-46-3	276.38	0.00175	0.1427	490	3240	720	360	5.25	3.383	9.599	6.62
89-47-4	240.39	0.899	0.3057	368	3240	720	360	12	706.6	6.813	5.79
89-48-5	198.31	12.2	17.13	344	3240	720	360	13.9	140.9	5.393	4.39
89-65-6	176.13	2.38e-08	1000000	271	1870	416	208	3.87	4.2e-12	3.929	-1.88
89-68-9	184.67	0.408	89.19	1090	8100	1800	900	7.75	0.8447	8.358	4.16
89-71-4	150.18	22.6	339.5	451	3240	720	360	129	9.967	5.555	2.38
89-72-5	150.22	5.35	464	470	3240	720	360	5.82	1.731	7.497	3.46
89-73-6	153.14	2.94e-06	46600	712	3240	720	360	7.13	9.64e-09	11.534	0.91
89-74-7	148.21	10.8	334.1	908	8100	1800	900	20.6	4.797	6.083	2.77
89-78-1	156.27	1.02	434.5	417	3240	720	360	10.7	0.3678	6.397	3.38
89-79-2	154.25	0.662	308.6	422	3240	720	360	3.08	0.3305	6.631	3.37
89-80-5	154.25	49.4	180.5	385	3240	720	360	9.75	42.16	5.237	2.87
89-81-6	152.24	13.8	273.1	427	3240	720	360	1.57	7.729	5.294	3.07
89-82-7	152.24	21.6	173.7	404	3240	720	360	0.458	18.93	5.451	3.2
89-83-8	150.22	2.23	437.4	470	3240	720	360	2.39	0.7647	8.005	3.52
89-84-9	152.15	0.00253	15070	732	3240	720	360	1.28	2.557e-05	9.751	1.49
89-86-1	154.12	2.11e-05	11220	690	3240	720	360	1.28	2.89e-07	11.848	1.76
89-88-3	220.36	0.00284	9.203	451	3240	720	360	0.148	0.068	7.622	4.78
89-95-2	122.17	1.59	13110	584	3240	720	360	26.3	0.01478	6.628	1.62
89-98-5	140.57	26.4	852.6	601	8100	1800	900	14.8	4.352	5.721	2.35
90-00-6	122.17	19.7	2912	460	3240	720	360	6.13	0.8278	6.195	2.55
90-02-8	122.12	29.5	10670	377	3240	720	360	9.17	0.3387	5.449	2.01
90-04-0	123.16	14.2	9598	808	8100	1800	900	2.73	0.1831	5.602	1.16
90-05-1	124.14	15.1	7226	450	3240	720	360	8.62	0.2588	5.629	1.34
90-12-0	142.2	4.91	40.62	414	3240	720	360	4.84	17.18	5.547	3.72
90-15-3	144.17	0.0365	1126	475	3240	720	360	0.467	0.004677	8.46	2.69
90-17-5	267.54	0.13	9.645	1710	13000	2880	1440	52.6	3.609	8.324	3.85
90-20-0	319.31	9.88e-15	35360	1850	8100	1800	900	7.87	8.92e-17	19.433	-2.33
90-30-2	219.29	0.00385	8.991	1350	8100	1800	900	0.741	0.09397	9.576	4.47
90-42-6	180.29	2.87	30.41	453	3240	720	360	8.04	16.99	6.109	3.81
90-43-7	170.21	0.0941	535.8	495	3240	720	360	9.39	0.0299	7.457	3.28
90-51-7	239.25	3.27e-09	15740	1720	8100	1800	900	1.7	4.97e-11	14.043	-1.39
90-64-2	152.15	0.000769	176300	399	1870	416	208	24.7	6.64e-07	7.17	0.57
90-66-4	358.54	1.15e-08	0.001906	4610	13000	2880	1440	2.54	0.002154	18.188	8.24
90-72-2	265.4	0.000215	164300	2840	13000	2880	1440	1.02	3.47e-07	15.195	0.77
90-80-2	178.14	3.68e-07	1000000	333	1870	416	208	7.92	6.56e-11	5.269	-1.98
90-87-9	180.25	12	542.5	921	8100	1800	900	14.6	4	5.881	2.35
90-93-7	324.47	1.45e-05	0.189	2480	13000	2880	1440	1.09	0.02495	12.677	5.47
91-01-0	184.24	0.00788	891.1	710	3240	720	360	15.9	0.001629	8.938	2.71
91-10-1	154.17	0.41	7578	439	3240	720	360	1.56	0.008327	6.175	1.16
91-16-7	138.17	35.6	3666	108	3240	720	360	7.33	1.342	4.712	1.64
91-19-0	130.15	9.48	6850	588	3240	720	360	128	0.1801	6.254	1.12
91-20-3	128.18	5.38	142.1	873	8100	1800	900	11.9	4.859	5.045	3.17
91-22-5	129.16	7.19	1711	484	3240	720	360	22.1	0.5425	6.196	2.14
91-44-1	231.3	0.00257	53.28	1020	8100	1800	900	0.808	0.01117	8.124	3.22
91-50-9	323.44	7.55e-05	0.08299	2160	8100	1800	900	16.6	0.2941	9.818	5.89
91-51-0	337.47	4.04e-05	0.02806	2350	8100	1800	900	18.8	0.4858	10.155	6.35
91-56-5	147.13	0.000208	15270	640	3240	720	360	6.6	2e-06	9.874	0.45
91-57-6	142.2	4.61	41.42	414	3240	720	360	4.91	15.79	5.534	3.72
91-59-8	143.19	0.0353	917	1110	8100	1800	900	1.28	0.005517	7.76	2.25
91-60-1	160.24	0.143	34.4	460	3240	720	360	2.05	0.6707	6.541	3.86
91-61-2	147.22	1.76	176.9	1010	8100	1800	900	3.33	1.465	7.014	3.1
91-62-3	143.19	1.79	631.1	476	3240	720	360	8.44	0.4053	6.978	2.69
91-63-4	143.19	4.37	498.5	475	3240	720	360	8.44	1.256	7.098	2.69
91-64-5	146.15	0.0876	5126	509	3240	720	360	7.83	0.002497	6.782	1.51
91-66-7	149.24	21.1	113.9	749	8100	1800	900	1.56	27.6	5.415	3.15
91-68-9	165.24	0.108	673.8	1170	8100	1800	900	1.18	0.02645	8.513	2.32
91-76-9	187.21	1.65e-05	3500	1810	8100	1800	900	69.8	8.84e-07	10.135	1.44
91-87-2	248.37	0.0681	2.257	463	3240	720	360	0.276	7.497	7.947	4.72
91-94-1	253.13	0.000554	22.86	2900	13000	2880	1440	6.49	0.006141	12.445	3.21
92-36-4	240.32	2.67e-06	24.22	2090	8100	1800	900	2.82	2.659e-05	12.899	3.56
92-48-8	160.17	0.0683	1189	447	3240	720	360	7.43	0.009195	5.564	2.06
92-52-4	154.21	0.999	27.35	447	3240	720	360	35.7	5.63	5.91	3.76
92-67-1	169.23	0.128	223.9	1120	8100	1800	900	3.2	0.09654	8.084	2.84
92-69-3	170.21	0.00231	431.6	603	3240	720	360	9.39	0.0009096	8.955	3.28
92-70-6	188.18	8.31e-06	474.1	741	3240	720	360	10.6	3.3e-06	10.295	3.42
92-87-5	184.24	0.00012	3765	1830	8100	1800	900	1.67	5.86e-06	10.015	1.92
92-88-6	186.21	1.53e-06	798.2	811	3240	720	360	5.36	3.58e-07	12.537	2.8
93-00-5	223.25	7.01e-08	1965	1690	8100	1800	900	5.83	7.97e-09	10.54	-0.91
93-03-8	168.19	0.00928	49210	472	3240	720	360	5	3.171e-05	8.227	0.72
93-04-9	158.2	0.356	75.88	407	3240	720	360	1.28	0.7422	6.366	3.25
93-08-3	170.21	0.121	226.1	479	3240	720	360	13	0.09093	7.257	2.85
93-15-2	178.23	0.463	144.8	990	8100	1800	900	2.97	0.5694	6.67	3.03
93-16-3	178.23	1.2	169.1	348	8100	1800	900	1.84	1.262	6.157	2.95
93-18-5	172.23	0.519	38.32	411	3240	720	360	1.25	2.331	6.513	3.74
93-19-6	185.27	0.107	16.69	1180	8100	1800	900	7.85	1.187	8.228	4.09
93-23-2	378.4	7.69e-06	57.83	3980	8100	1800	900	7.62	5.034e-05	10.039	2.17
93-26-5	165.19	0.0528	17350	1290	8100	1800	900	21.1	0.0005027	8.496	0.62
93-28-7	206.24	0.634	98.28	448	3240	720	360	3.27	1.329	6.703	3.06
93-29-8	206.24	0.207	114.7	449	3240	720	360	1.89	0.3716	6.89	2.99
93-51-6	138.17	7.92	2093	454	3240	720	360	6.46	0.5228	6.145	1.88
93-53-8	134.18	40.4	1877	402	3240	720	360	9.38	2.888	5.487	1.96
93-54-9	136.2	3.08	5677	469	3240	720	360	17.8	0.07389	6.785	1.98
93-55-0	134.18	19.9	1193	448	3240	720	360	85.3	2.234	5.402	2.16
93-58-3	136.15	50.6	1344	434	3240	720	360	304	5.119	4.998	1.83
93-60-7	137.14	25	16830	678	3240	720	360	763	0.2042	6.561	0.64
93-69-6	191.24	0.00049	6130	1790	8100	1800	900	1.88	1.531e-05	15.454	1.05
93-82-3	371.61	1.04e-10	0.04793	528	3240	720	360	4.44	8.04e-07	15.147	5.83
93-83-4	369.59	7.84e-11	0.07525	483	3240	720	360	1.11	3.85e-07	14.991	5.62
93-89-0	150.18	26.3	421.5	422	3240	720	360	112	9.358	5.163	2.32
93-91-4	162.19	1.01	20310	664	3240	720	360	107	0.008081	7.179	0.61
93-92-5	164.21	14.9	481.1	449	3240	720	360	32.3	5.097	5.614	2.5
93-99-2	198.22	0.0454	38.39	481	3240	720	360	67.8	0.2347	6.871	3.04
94-02-0	192.22	0.594	1212	662	3240	720	360	70.2	0.0943	7.767	1.71
94-08-6	164.21	9.39	233.3	454	3240	720	360	74.5	6.606	5.552	2.87
94-13-3	180.21	0.0409	529.3	746	3240	720	360	18.2	0.01394	9.624	2.98
94-26-8	194.23	0.0335	159	443	1870	416	208	16.6	0.04088	10.032	3.47
94-28-0	402.58	0.000562	0.04851	789	3240	720	360	5.78	4.669	12.385	5.6
94-30-4	180.21	1.26	489.9	425	3240	720	360	27.2	0.4654	6.352	2.4
94-36-0	242.23	0.0093	28.97	934	8100	1800	900	72.2	0.0777	7.299	3.43
94-43-9	398.81	0.000624	30.96	1840	8100	1800	900	68.9	0.008037	10.664	2.34
94-44-0	213.24	0.0155	333.3	1840	8100	1800	900	39.7	0.009895	9.224	2.35
94-46-2	192.26	2.01	13.68	446	3240	720	360	38.9	28.29	6.505	3.72
94-47-3	226.28	0.0147	11.99	529	3240	720	360	30.3	0.2768	7.828	4.03
94-48-4	258.36	0.0167	0.1831	473	3240	720	360	0.262	23.7	7.638	5.93
94-51-9	342.39	0.000174	2.526	794	3240	720	360	9.51	0.02367	11.634	4.02
94-62-2	285.35	0.000375	10.56	1850	8100	1800	900	1.36	0.01012	13.793	3.69
94-86-0	178.23	0.0479	116.2	468	3240	720	360	1.67	0.07341	8.979	3.14
94-96-2	146.23	0.4	3389	569	3240	720	360	11.5	0.01726	7.852	1.6
95-03-4	157.6	1.76	2032	865	8100	1800	900	3.87	0.1365	7.267	1.8
95-13-6	116.16	117	332.4	327	3240	720	360	1.44	40.81	4.107	3.25
95-14-7	119.13	0.00328	5957	606	3240	720	360	257	6.559e-05	6.661	1.17
95-16-9	135.18	9.89	1684	533	3240	720	360	36.7	0.7941	6.826	2.17
95-18-1	168.17	0.00125	9005	665	3240	720	360	13	2.335e-05	8.171	1.67
95-19-2	352.61	4.02e-08	0.0015	587	3240	720	360	2.31	0.009465	14.315	7.73
95-20-5	131.18	0.525	628.4	463	3240	720	360	1.28	0.1097	6.928	2.6
95-21-6	133.15	46.9	1038	482	3240	720	360	10.9	6.02	6.779	2.27
95-31-8	238.37	0.00107	2.817	1940	8100	1800	900	5.63	0.09025	12.131	2.56
95-33-0	264.41	0.000238	21.39	1950	8100	1800	900	3.23	0.00295	11.04	3.47
95-41-0	166.27	4.17	43.35	420	3240	720	360	1.64	16.01	6.03	3.71
95-47-6	106.17	908	224.1	183	3240	720	360	18.7	430.1	3.834	3.09
95-48-7	108.14	33.4	9066	460	3240	720	360	6.08	0.3976	6.259	2.06
95-50-1	147	129	92.03	425	8100	1800	900	611	205.5	4.535	3.28
95-53-4	107.16	47.4	8292	438	3240	720	360	1.94	0.6117	5.412	1.62
95-54-5	108.14	0.00705	82150	1040	8100	1800	900	1.46	9.28e-06	6.681	0.16
95-55-6	109.13	0.0668	32360	736	3240	720	360	3.46	0.0002253	8.712	0.6
95-63-6	120.2	215	79.59	253	8100	1800	900	7.9	326.2	4.229	3.63
95-65-8	122.17	2.45	4668	466	3240	720	360	3.15	0.0642	7	2.61
95-68-1	121.18	23.7	3652	952	8100	1800	900	1.58	0.7875	5.703	2.17
95-69-2	141.6	4.33	953.9	964	8100	1800	900	6.64	0.6412	6.465	2.27
95-70-5	122.17	0.454	72460	1380	8100	1800	900	1.28	0.0007643	7.677	0.16
95-79-4	141.6	6.1	953.9	957	8100	1800	900	2.76	0.9044	6.465	2.27
95-80-7	122.17	0.0758	74820	1380	8100	1800	900	1.34	0.0001239	7.657	0.16
95-82-9	162.02	1.99	300.3	976	8100	1800	900	11.6	1.072	7.117	2.37
95-85-2	143.57	0.0343	2302	1660	8100	1800	900	4.91	0.002137	10.031	1.24
95-87-4	122.17	4.24	3835	461	3240	720	360	3.21	0.1351	6.669	2.61
95-88-5	144.56	0.0653	8840	770	3240	720	360	1.54	0.001068	10.553	1.68
95-92-1	146.14	97.5	26220	401	3240	720	360	77.2	0.5432	4.604	0.4
95-96-5	144.13	0.0209	3165	381	3240	720	360	114	0.0009532	4.952	1.65
96-04-8	128.17	149	71410	389	3240	720	360	38	0.2656	4.864	0.14
96-05-9	126.16	889	1470	201	3240	720	360	3.79	76.32	4.23	2.12
96-15-1	87.17	5600	109700	405	3240	720	360	7.11	4.45	4.267	1.25
96-17-3	86.13	1390	11230	171	3240	720	360	9.55	10.63	3.417	1.23
96-20-8	89.14	36.3	1000000	596	3240	720	360	4.77	0.003233	6.877	-0.7
96-22-0	86.13	5320	18140	330	3240	720	360	128	25.26	3.679	0.75
96-26-4	90.08	0.594	503200	104	1870	416	208	49.5	0.0001062	0.596	-0.71
96-27-5	108.16	1.35	573600	347	1870	416	208	4.58	0.0002539	5.759	-0.84
96-29-7	87.12	157	36630	464	3240	720	360	173	0.371	4.001	1.69
96-31-1	88.11	0.204	16150	608	3240	720	360	82.4	0.001113	6.653	-0.62
96-33-3	86.09	11500	26360	210	3240	720	360	24.7	37.66	2.89	0.73
96-37-7	84.16	17800	49.37	95.7	3240	720	360	45.3	30230	2.199	3.1
96-41-3	86.13	307	43180	370	3240	720	360	24	0.6143	4.971	1.15
96-47-9	86.13	13900	8861	292	3240	720	360	11.7	134.8	3.77	1.35
96-48-0	86.09	39.4	447500	562	3240	720	360	111	0.007566	5.027	-0.31
96-49-1	88.06	2.91	244900	204	3240	720	360	109	0.001045	1.611	-0.34
96-50-4	100.14	8.19	55340	676	3240	720	360	3.32	0.01481	7.638	0.83
96-54-8	81.12	2600	12060	349	3240	720	360	2.33	17.49	3.311	1.43
96-69-5	358.54	2.89e-08	0.001906	4660	13000	2880	1440	1.98	0.005442	18.188	8.24
96-82-2	358.3	2.42e-16	1000000	126	503	112	55.9	1.62	8.65e-20	17.54	-4.89
96-91-3	199.12	3.39e-05	7100	1720	8100	1800	900	364	9.5e-07	10.329	0.81
97-00-7	202.55	0.0645	242.5	1660	13000	2880	1440	12000	0.0539	6.108	2.27
97-02-9	183.12	0.00105	1437	1690	8100	1800	900	153	0.0001334	9.417	1.84
97-23-4	269.13	3.05e-06	16.17	3500	13000	2880	1440	10.3	5.081e-05	14.588	4.34
97-24-5	287.16	8.2e-07	6.293	2240	8100	1800	900	20.6	3.741e-05	15.737	4.62
97-30-3	194.19	1.89e-06	1000000	414	1870	416	208	4.08	3.68e-10	9.695	-2.5
97-42-7	194.28	4.7	10.06	329	3240	720	360	0.458	90.89	5.722	4.29
97-45-0	208.3	1.86	3.245	350	3240	720	360	0.458	119	6.099	4.79
97-50-7	187.63	0.163	2918	810	8100	1800	900	2.23	0.01046	8.145	1.88
97-52-9	168.15	0.0143	2964	1400	8100	1800	900	20.6	0.0008093	9.291	1.55
97-53-0	164.21	1.26	754	461	3240	720	360	3.37	0.2753	6.36	2.73
97-54-1	164.21	0.508	165.9	467	3240	720	360	1.73	0.5028	9.002	2.65
97-56-3	225.3	0.00127	2.594	2100	13000	2880	1440	4.7	0.1101	10.176	4.29
97-59-6	158.12	1.74e-07	1000000	640	3240	720	360	13.1	2.74e-11	12.716	-3.14
97-61-0	116.16	57.3	7468	264	1870	416	208	49.3	0.8896	5.958	1.98
97-62-1	116.16	3220	3172	200	3240	720	360	98.8	118.2	3.546	1.77
97-63-2	114.15	2380	2321	156	3240	720	360	8.44	117.4	3.57	1.77
97-64-3	118.13	144	472800	396	3240	720	360	65.8	0.03598	4.443	-0.18
97-67-6	134.09	0.00039	1000000	124	503	112	55.9	30.9	5.24e-08	9.203	-1.68
97-74-5	208.36	0.0359	92520	965	8100	1800	900	1.85	8.107e-05	3.898	0.75
97-77-8	296.52	0.000881	63.66	1060	8100	1800	900	0.654	0.004105	6.348	3.67
97-78-9	271.4	5.1e-05	5.659	759	3240	720	360	7.23	0.002443	12.355	4.1
97-85-8	144.22	570	412.1	196	3240	720	360	46.7	199.7	4.154	2.68
97-86-9	142.2	423	438.6	209	3240	720	360	7.71	137.5	4.33	2.67
97-87-0	144.22	423	356.7	159	1870	416	208	46.7	171.4	4.289	2.76
97-88-1	142.2	335	284.6	172	1870	416	208	7.71	167.2	4.573	2.75
97-89-2	226.36	1.9	0.6792	344	3240	720	360	0.515	635.4	6.245	5.47
97-90-5	198.22	11300	580.5	408	3240	720	360	4.2	3856	7.021	2.21
97-95-0	102.18	213	11950	315	3240	720	360	24.7	1.824	4.427	1.75
97-96-1	100.16	2250	3930	157	3240	720	360	8.4	57.42	3.794	1.73
97-99-4	102.13	36.3	463400	567	3240	720	360	10.9	0.007992	6.667	-0.11
98-00-0	98.1	54.5	221000	406	3240	720	360	2.47	0.0242	5.773	0.45
98-01-1	96.09	309	53580	356	3240	720	360	7.31	0.5547	4.222	0.83
98-02-2	114.16	386	2216	389	3240	720	360	1.28	19.85	4.153	1.96
98-03-3	112.15	55.8	14400	352	3240	720	360	11.8	0.4351	4.545	1.53
98-13-5	211.55	45.8	31.9	436	3240	720	360	132	303.3	5.471	3.6
98-29-3	166.22	0.0444	748.2	1840	8100	1800	900	5	0.009863	11.149	2.94
98-36-2	207.63	5.83e-06	6751	1150	8100	1800	900	37.4	1.79e-07	9.13	-1.44
98-37-3	189.19	1.13e-06	76510	640	3240	720	360	15.9	2.81e-09	11.862	-2.56
98-44-2	253.25	1.01e-10	87700	700	3240	720	360	49.4	2.91e-13	13.74	-3.03
98-51-1	148.25	79	2.969	299	8100	1800	900	18.3	3941	5.371	4.45
98-52-2	156.27	1.45	528.9	417	3240	720	360	12.7	0.4254	6.297	3.42
98-53-3	154.25	23.1	239.8	755	8100	1800	900	17.3	14.84	5.097	2.91
98-54-4	150.22	0.596	428.9	1070	8100	1800	900	6.32	0.2087	7.623	3.42
98-55-5	154.25	2.62	371.7	825	8100	1800	900	0.509	1.084	6.582	3.33
98-59-9	190.65	0.161	51.18	888	8100	1800	900	210	0.6009	6.893	3.49
98-71-5	188.2	1.92e-07	52380	640	3240	720	360	27.7	6.9e-10	10.458	-2.36
98-73-7	178.23	0.0106	28.94	1350	8100	1800	900	98.3	0.06536	8.791	3.78
98-79-3	129.12	0.000677	379900	587	3240	720	360	18.2	2.3e-07	9.34	-0.72
98-82-8	120.2	478	75.03	180	3240	720	360	39.5	766.8	3.988	3.45
98-83-9	118.18	259	108.7	277	3240	720	360	1.43	282.7	4.462	3.44
98-85-1	122.17	7.27	19540	466	3240	720	360	21.9	0.04543	6.348	1.49
98-86-2	120.15	43.5	4484	435	3240	720	360	93.7	1.165	4.951	1.67
98-88-4	140.57	55.3	4941	299	3240	720	360	144	1.574	3.708	1.44
98-89-5	128.17	7.58	4919	292	1870	416	208	26.2	0.1973	6.35	2.36
98-92-0	122.13	0.0264	204000	1130	8100	1800	900	110	1.58e-05	9.556	-0.45
98-94-2	127.23	335	10260	680	8100	1800	900	2.5	4.15	5.327	2.31
98-95-3	123.11	27.9	1047	477	3240	720	360	1830	3.292	4.858	1.81
99-06-9	138.12	0.00132	16970	677	3240	720	360	26.3	1.073e-05	10.835	1.39
99-09-2	138.13	0.025	5764	1550	8100	1800	900	27.3	0.0006007	7.86	1.47
99-14-9	176.13	0.000137	1000000	128	503	112	55.9	46.8	2.42e-08	13.581	-1.08
99-18-3	295.29	2.86e-11	268800	636	3240	720	360	3.72	3.15e-14	11.001	-1.85
99-20-7	342.3	2.92e-14	1000000	414	1870	416	208	2.07	9.99e-18	14.258	-5.48
99-30-9	207.02	0.00159	163.6	2670	13000	2880	1440	1860	0.002024	8.519	2.76
99-48-9	152.24	1.76	519.7	420	3240	720	360	0.454	0.5155	6.365	3.29
99-49-0	150.22	17.3	367.1	396	3240	720	360	1.16	7.092	5.21	3.07
99-50-3	154.12	2.42e-05	50980	690	3240	720	360	27.6	7.34e-08	14.18	0.91
99-51-4	151.17	3.01	99.96	999	8100	1800	900	244	4.557	5.885	2.91
99-55-8	152.15	0.0784	1878	1520	8100	1800	900	22	0.006351	8.34	2.02
99-56-9	153.14	0.000924	13020	1480	8100	1800	900	11.6	1.087e-05	10.845	0.55
99-57-0	154.13	0.00199	6107	1660	8100	1800	900	36.9	5.014e-05	11.755	0.99
99-59-2	168.15	0.0254	3485	1430	8100	1800	900	28.6	0.001229	9.211	1.55
99-71-8	150.22	1.12	674.2	470	3240	720	360	5.82	0.2489	7.307	3.46
99-72-9	148.21	11.4	558.6	796	8100	1800	900	8.85	3.014	5.994	2.51
99-75-2	150.18	13.7	374.5	451	3240	720	360	129	5.507	5.505	2.38
99-76-3	152.15	0.114	5981	730	3240	720	360	23.2	0.0029	8.791	2
99-83-2	136.24	255	2.862	71.6	3240	720	360	0.0223	12120	3.518	4.62
99-85-4	136.24	153	3.618	142	3240	720	360	0.586	5773	4.536	4.75
99-86-5	136.24	222	5.915	70.5	3240	720	360	0.00311	5098	3.076	4.75
99-87-6	134.22	152	27.88	206	3240	720	360	17	731.7	4.447	4
99-89-8	136.2	2.01	1102	467	3240	720	360	6.04	0.2488	7.251	2.97
99-93-4	136.15	0.261	23220	717	3240	720	360	8.38	0.001532	8.73	1.19
99-96-7	138.12	0.000938	14500	677	3240	720	360	19.7	8.93e-06	11.125	1.39
99-97-8	135.21	27.7	349.1	800	8100	1800	900	1.27	10.69	5.511	2.72
100-02-7	139.11	0.0386	7507	769	3240	720	360	59.6	0.0007165	9.68	1.91
100-06-1	150.18	1.77	2474	402	3240	720	360	12.5	0.1076	6.365	1.75
100-09-4	152.15	0.0192	1573	555	3240	720	360	27.6	0.001857	8.542	1.96
100-21-0	166.13	0.00158	1256	737	3240	720	360	208	0.0002098	12.05	1.76
100-26-5	167.12	3.87e-05	20790	707	3240	720	360	238	3.12e-07	13.502	0.57
100-37-8	117.19	86.3	953900	558	3240	720	360	2.6	0.01061	6.944	0.05
100-41-4	106.17	1010	228.6	175	3240	720	360	36.1	470	3.642	3.03
100-42-5	104.15	674	343.7	235	3240	720	360	3.28	204	3.899	2.89
100-45-8	107.16	54.3	1414	398	3240	720	360	1.04	4.122	4.609	1.91
100-46-9	107.16	101	132800	467	3240	720	360	7.43	0.08144	5.692	1.07
100-47-0	103.12	74.8	2893	438	3240	720	360	778	2.666	4.232	1.54
100-51-6	108.14	7.14	41050	424	3240	720	360	11.2	0.01879	5.961	1.08
100-52-7	106.13	135	6100	342	3240	720	360	19.9	2.343	4.442	1.71
100-53-8	124.2	63.2	732.2	401	3240	720	360	5.75	10.72	4.544	2.48
100-55-0	109.13	0.153	1000000	643	3240	720	360	59.3	1.673e-05	7.914	-0.11
100-61-8	107.16	58.1	4249	426	3240	720	360	5.84	1.466	5.1	1.62
100-66-3	108.14	450	1741	268	3240	720	360	14.8	27.99	3.814	2.07
100-68-5	124.2	68.1	442.6	400	3240	720	360	18.8	19.12	4.933	2.59
100-79-8	132.16	8.62	35490	576	3240	720	360	12.2	0.03212	8.177	1.07
100-80-1	118.18	277	117.1	268	3240	720	360	5.05	279.9	4.344	3.44
100-86-7	150.22	3.94	2029	1060	8100	1800	900	26.8	0.2922	7.122	2.44
100-97-0	140.19	12.1	1000000	1150	13000	2880	1440	0.505	0.001701	3.024	-4.15
101-02-0	310.29	0.0102	0.02352	3050	8100	1800	900	23.7	134.2	11.275	6.62
101-14-4	267.16	0.000524	8.684	2960	13000	2880	1440	3.31	0.01612	12.781	3.47
101-20-2	315.59	4.82e-07	0.6479	2910	13000	2880	1440	12.1	0.0002344	13.633	4.9
101-21-3	213.67	0.453	37.39	1030	8100	1800	900	6.47	2.59	8.143	3.3
101-25-7	186.17	0.000119	1000000	1670	38900	8640	4320	0.617	2.21e-08	1.996	-1.7
101-34-8	1059.57	3.86e-22	3.82e-20	1070	8100	1800	900	0.424	3695000000	30.965	21.69
101-37-1	249.27	0.0281	0.76	1680	13000	2880	1440	1.98	9.227	10.026	5.27
101-39-3	146.19	3.33	752.8	424	3240	720	360	3.73	0.6473	6.359	2.37
101-41-7	150.18	20.9	2072	451	3240	720	360	68.6	1.517	5.066	2.08
101-42-8	164.21	0.0102	9529	682	3240	720	360	5.73	0.000176	8.065	1.38
101-43-9	168.24	29.1	133.1	346	3240	720	360	6.34	36.74	5.099	3.54
101-48-4	166.22	17.7	1439	436	3240	720	360	15.7	2.048	5.584	1.93
101-49-5	164.21	4.54	1834	442	3240	720	360	12.5	0.4071	5.83	1.82
101-50-8	357.36	4.67e-15	124.1	1820	8100	1800	900	26.8	1.34e-14	18.425	-0.91
101-54-2	184.24	0.00584	1453	1780	8100	1800	900	1.28	0.0007404	9.639	1.82
101-67-7	393.66	2.81e-07	8.09e-07	1100	8100	1800	900	1.17	136.8	13.819	11.26
101-68-8	250.26	0.0252	0.8288	2370	8100	1800	900	22.2	7.609	9.657	5.22
101-72-4	226.32	0.00948	50.32	1680	8100	1800	900	1.18	0.04263	10.51	3.28
101-77-9	198.27	0.000276	1959	1860	8100	1800	900	8.56	2.793e-05	10.201	2.18
101-80-4	200.24	0.000337	3009	1780	8100	1800	900	1.28	2.245e-05	10.581	2.22
101-81-5	168.24	1.63	18.26	468	3240	720	360	24.2	14.99	6.418	4.02
101-84-8	170.21	2.26	15.58	432	3240	720	360	26.7	24.76	6.153	4.05
101-85-9	204.31	0.00261	25.72	463	3240	720	360	0.277	0.02076	8.851	4.35
101-86-0	216.33	0.0712	2.75	458	3240	720	360	3.41	5.601	8.191	4.82
101-90-6	222.24	0.104	2957	1380	8100	1800	900	1.19	0.007836	9.171	1.23
101-94-0	226.28	0.0127	16.59	1110	8100	1800	900	34.7	0.1735	7.467	3.84
101-97-3	164.21	12.2	739.4	456	3240	720	360	49.5	2.703	5.394	2.57
102-01-2	177.2	0.00414	7832	655	3240	720	360	19.7	9.381e-05	10.78	1.01
102-04-5	210.28	0.0402	74.43	1230	8100	1800	900	23.1	0.1134	8.059	3.18
102-06-7	211.27	0.000529	129.1	1850	8100	1800	900	3.01	0.0008662	12.426	2.89
102-08-9	228.31	0.00037	55.99	1190	8100	1800	900	3.01	0.001506	8.916	3.21
102-13-6	192.26	4.26	51.02	458	3240	720	360	31.8	16.08	6.349	3.48
102-16-9	226.28	0.0147	18.53	503	3240	720	360	26	0.1791	8.122	3.79
102-17-0	256.3	0.000851	10.82	1300	8100	1800	900	8.01	0.02015	9.429	3.87
102-19-2	206.29	0.907	16.47	458	3240	720	360	27	11.36	6.715	3.97
102-20-5	240.3	0.0248	5.921	1180	8100	1800	900	22.6	1.006	8.487	4.28
102-22-7	272.39	0.00706	0.09284	1100	8100	1800	900	0.261	20.69	8.278	6.18
102-28-3	150.18	0.00178	2590	1240	8100	1800	900	1.28	0.0001036	10.23	0.18
102-29-4	152.15	0.132	25130	672	3240	720	360	7.43	0.0007983	7.79	1.11
102-37-4	208.22	0.000231	982.8	779	3240	720	360	4.84	4.887e-05	14.174	1.89
102-56-7	153.18	0.356	6938	743	8100	1800	900	1.27	0.007859	7.765	1.24
102-60-3	292.42	1.16e-06	1000000	1360	8100	1800	900	1.11	3.39e-10	11.69	-2.08
102-69-2	143.27	404	3423	643	8100	1800	900	2.52	16.91	4.598	2.99
102-71-6	149.19	0.000451	1000000	640	3240	720	360	2.32	6.72e-08	9.54	-2.48
102-76-1	218.21	0.699	21520	670	3240	720	360	30.2	0.007084	6.549	0.36
102-77-2	252.35	0.000679	3061	1870	8100	1800	900	2.14	5.594e-05	10.673	1.02
102-79-4	161.25	0.0261	728600	634	3240	720	360	2.35	5.75e-06	8.055	-0.03
102-81-8	173.3	1.65	3297	346	1870	416	208	2.38	0.0869	9.052	2.01
102-82-9	185.36	20.9	82.23	264	1870	416	208	2.42	47.18	6.644	4.46
102-87-4	522.01	6.65e-09	7.05e-11	1110	8100	1800	900	1.83	49250	15.005	16.24
103-04-8	168.21	0.0628	3861	714	3240	720	360	13.8	0.002736	9.2	1.85
103-05-9	164.25	0.53	667.7	1070	8100	1800	900	22.3	0.1305	7.489	2.93
103-07-1	206.29	0.99	17.74	1050	8100	1800	900	33	11.52	6.675	3.93
103-09-3	172.27	50.6	38.59	179	1870	416	208	23.4	225.6	5.025	3.74
103-11-7	184.28	24.4	16.8	364	3240	720	360	11.8	267.6	5.843	4.09
103-13-9	204.27	0.209	108.1	1010	8100	1800	900	3.05	0.3955	8.332	3.03
103-23-1	370.58	0.000427	0.0005452	311	1870	416	208	10.1	290	12.871	8.12
103-24-2	412.66	0.000504	1.655e-05	482	3240	720	360	8.68	12570	11.896	9.59
103-25-3	164.21	6.68	683.4	468	3240	720	360	39.1	1.605	5.434	2.57
103-26-4	162.19	1.65	387.1	462	3240	720	360	8.12	0.6927	6.391	2.36
103-28-6	178.23	5.7	157.2	470	3240	720	360	35.3	6.47	5.982	2.99
103-29-7	182.27	0.338	4.357	1100	8100	1800	900	21.4	14.17	6.374	4.74
103-34-4	236.35	0.00407	506500	1360	8100	1800	900	0.685	1.9e-06	6.437	-1.47
103-36-6	176.22	1.17	160.6	458	3240	720	360	7.77	1.279	6.749	2.85
103-37-7	178.23	6.51	136	474	3240	720	360	32	8.526	6.052	3.06
103-38-8	192.26	4.74	78.74	471	3240	720	360	27.3	11.56	6.129	3.48
103-41-3	238.29	0.0132	9.269	708	3240	720	360	6.81	0.338	8.925	4.06
103-44-6	156.27	251	41.6	79.5	3240	720	360	3.94	941.5	3.558	3.79
103-45-7	164.21	9.1	710.8	466	3240	720	360	32.6	2.104	5.414	2.57
103-48-0	192.26	3.63	51.02	467	3240	720	360	29.3	13.67	6.349	3.48
103-50-4	198.27	0.289	66.55	478	3240	720	360	12.2	0.8619	6.871	3.48
103-52-6	192.26	1.14	44.15	470	3240	720	360	27	4.987	6.419	3.55
103-53-7	252.32	0.00222	2.954	665	3240	720	360	6.55	0.1902	9.301	4.56
103-54-8	176.22	1.62	212.3	454	3240	720	360	2.08	1.339	6.226	2.85
103-56-0	190.24	0.982	68.97	459	3240	720	360	2.07	2.71	6.592	3.34
103-58-2	206.29	0.907	16.47	468	3240	720	360	25.2	11.36	6.715	3.97
103-59-3	204.27	0.729	25.75	459	3240	720	360	2.06	5.785	6.888	3.76
103-60-6	208.26	0.701	105.7	451	3240	720	360	8.21	1.382	7.148	3.01
103-61-7	204.27	0.317	22.29	462	3240	720	360	2.05	2.908	6.958	3.83
103-65-1	120.2	348	70.73	198	3240	720	360	42.8	591.3	4.057	3.52
103-71-9	119.12	291	617.1	439	3240	720	360	120	56.1	4.611	2.59
103-79-7	134.18	20.9	5213	453	3240	720	360	45.5	0.5388	5.226	1.47
103-82-2	136.15	0.517	13480	621	3240	720	360	57.6	0.005225	7.186	1.43
103-83-3	135.21	123	18190	986	8100	1800	900	3.13	0.9117	5.899	1.75
103-84-4	135.17	0.0276	8958	674	3240	720	360	20.5	0.0004164	7.758	1.1
103-90-2	151.17	0.000259	30350	714	3240	720	360	14.5	1.29e-06	11.041	0.27
103-93-5	178.23	5.7	140.7	424	3240	720	360	53.4	7.228	5.338	3.05
103-95-7	190.29	3030	22.59	975	8100	1800	900	7.37	25490	7.024	3.91
104-09-6	134.18	11	1454	403	3240	720	360	9.24	1.019	5.697	2.09
104-15-4	172.2	0.000386	202300	658	3240	720	360	188	3.29e-07	6.324	-0.62
104-20-1	178.23	1.64	1007	928	8100	1800	900	8.11	0.2902	6.932	2.04
104-21-2	180.21	0.343	782.9	439	3240	720	360	8.99	0.07918	6.626	2.16
104-27-8	190.24	0.288	289.6	998	8100	1800	900	3.1	0.1892	8.035	2.61
104-28-9	250.3	0.0452	127.4	1620	8100	1800	900	3.91	0.0888	9.335	2.65
104-29-0	202.64	0.000494	2204	635	3240	720	360	9.21	4.535e-05	9.143	1.5
104-45-0	150.22	27	63.36	183	8100	1800	900	8.7	63.85	5.196	3.6
104-46-1	148.21	8.46	98.68	265	3240	720	360	1.82	12.7	5.37	3.39
104-49-4	160.13	0.434	128.2	505	3240	720	360	191	0.5429	6.578	3.19
104-50-7	142.2	8.46	3632	243	1870	416	208	31	0.3309	3.475	1.59
104-53-0	134.18	8.37	1624	415	3240	720	360	8.52	0.6918	5.557	2.03
104-54-1	134.18	0.358	6188	454	3240	720	360	2.05	0.007748	7.14	1.84
104-55-2	132.16	4.49	2150	426	3240	720	360	5.13	0.2762	6.084	1.82
104-57-4	136.15	41.4	4257	451	3240	720	360	40.5	1.322	4.631	1.53
104-61-0	156.23	1.57	1201	247	1870	416	208	26.5	0.2046	3.842	2.08
104-62-1	150.18	20	1413	454	3240	720	360	32.8	2.126	4.999	2.02
104-64-3	164.21	3.63	465	459	3240	720	360	27.8	1.281	5.374	2.52
104-65-4	162.19	3.26	725.1	448	3240	720	360	2.08	0.7306	5.539	2.3
104-67-6	184.28	0.545	128.3	385	3240	720	360	20.5	0.7832	4.576	3.06
104-74-5	283.89	0.0047	2939	1050	3240	720	360	10	0.0004533	7.698	0.84
104-76-7	130.23	24.6	1379	255	1870	416	208	19.4	2.329	5.695	2.73
104-87-0	120.15	38.4	1183	368	3240	720	360	13.7	3.9	5.408	2.26
104-90-5	121.18	140	18030	999	8100	1800	900	106	0.9409	5.5	2.39
104-93-8	122.17	160	527.1	130	3240	720	360	9.39	37.08	4.502	2.62
104-94-9	123.16	2.55	15090	895	8100	1800	900	2.73	0.02078	6.519	1.16
105-01-1	196.25	4.15	64.04	441	3240	720	360	2.4	12.71	6.086	3.34
105-08-8	144.22	0.019	4312	404	3240	720	360	12.1	0.0006332	6.379	1.49
105-11-3	138.13	1.63e-05	4553	727	3240	720	360	2.21	4.94e-07	9.306	1.92
105-13-5	138.17	0.24	31710	500	3240	720	360	8.43	0.001046	7.378	1.16
105-16-8	185.27	15.2	11320	886	8100	1800	900	2.05	0.2488	7.113	1.95
105-21-5	128.17	10.2	10880	346	3240	720	360	37.4	0.1206	3.098	1.09
105-37-3	102.13	5190	10670	233	3240	720	360	120	49.64	3.199	1.36
105-43-1	116.16	59.3	5266	265	1870	416	208	44.3	1.309	6.138	1.98
105-45-3	116.12	166	406000	467	3240	720	360	478	0.04728	4.262	-0.69
105-46-4	116.16	2970	3520	196	3240	720	360	46.7	98.11	3.486	1.77
105-53-3	160.17	48.1	10340	401	3240	720	360	75.2	0.7455	5.026	0.9
105-54-4	116.16	1950	2745	208	3240	720	360	52	82.37	3.637	1.85
105-57-7	118.18	5260	19540	257	3240	720	360	13.1	31.77	3.239	1.2
105-58-8	118.13	1600	9441	294	3240	720	360	77.2	20.02	3.648	1.22
105-59-9	119.17	0.327	1000000	587	3240	720	360	2.65	3.893e-05	7.392	-1.5
105-60-2	113.16	0.483	28720	580	3240	720	360	14	0.001902	6.645	0.66
105-62-4	605.01	2.67e-10	2.62e-12	1080	8100	1800	900	0.646	61690	16.806	16.11
105-64-6	206.2	0.639	706.4	125	8100	1800	900	37.3	0.1868	2.903	2.06
105-66-8	130.19	739	925.9	195	3240	720	360	34.6	103.9	3.925	2.34
105-67-9	122.17	13.9	4068	462	3240	720	360	3.59	0.4164	6.71	2.61
105-68-0	144.22	332	356.7	207	3240	720	360	39.9	134.2	4.289	2.76
105-74-8	398.63	0.000266	4.57e-06	444	3240	720	360	9.89	23130	10.312	10.34
105-76-0	228.29	0.709	8.709	296	1870	416	208	15.2	18.59	8.976	4.16
105-79-3	172.27	51	38.59	179	1870	416	208	28.3	227.4	5.025	3.74
105-82-8	146.23	594	1068	244	3240	720	360	9.12	81.23	4.258	2.19
105-85-1	184.28	16.8	19.61	278	3240	720	360	0.516	157.9	4.895	4.01
105-86-2	182.26	9.07	23.73	327	3240	720	360	0.262	69.63	4.799	3.93
105-87-3	196.29	6.17	18.24	380	3240	720	360	0.262	66.43	4.985	4.48
105-89-5	212.34	3.91	1.57	344	3240	720	360	3.49	528.3	6.1	5.13
105-90-8	210.32	3.09	2.22	389	3240	720	360	0.262	293	5.852	4.97
105-91-9	210.32	3.09	2.22	389	3240	720	360	0.262	293	5.852	4.97
105-95-3	270.37	5.85e-05	1.719	555	3240	720	360	15	0.009185	8.603	4.71
105-97-5	426.69	6.04e-05	3.86e-06	502	3240	720	360	8.66	6683	12.414	10.23
105-99-7	258.36	0.364	4.231	294	1870	416	208	20.3	22.23	7.99	4.33
106-02-5	240.39	0.00689	0.1484	427	3240	720	360	13.4	11.17	7.173	6.15
106-11-6	372.59	7.26e-08	0.01591	583	3240	720	360	6.19	0.001702	13.279	6.98
106-14-9	300.49	4.51e-07	0.3315	391	1870	416	208	8.16	0.0004085	13.529	6.41
106-15-0	343.55	4.51e-11	0.326	542	3240	720	360	5.3	4.75e-08	14.84	5.06
106-16-1	341.54	3.31e-11	0.5117	482	3240	720	360	1.15	2.22e-08	14.676	4.84
106-17-2	342.52	2.63e-08	0.06164	474	3240	720	360	1.22	0.0001459	11.892	5.91
106-18-3	256.43	0.181	0.06006	244	1870	416	208	14.6	774.2	7.055	6.76
106-19-4	230.31	0.961	41.65	486	3240	720	360	26.1	5.315	7.257	3.35
106-21-8	158.29	4.74	175.4	402	3240	720	360	16.4	4.283	6.29	3.64
106-22-9	156.27	2.26	105.5	392	3240	720	360	0.514	3.337	6.544	3.56
106-23-0	154.25	33.9	38.94	263	3240	720	360	0.492	134.1	5.387	3.53
106-24-1	154.25	2.12	255.8	424	3240	720	360	0.261	1.278	6.798	3.47
106-25-2	154.25	2.12	255.8	424	3240	720	360	0.261	1.278	6.798	3.47
106-26-3	152.24	12.2	84.71	374	3240	720	360	0.468	21.88	5.263	3.45
106-27-4	158.24	135	117.8	216	3240	720	360	33.6	180.9	4.656	3.25
106-29-6	224.35	0.664	0.7127	395	3240	720	360	0.261	209	6.218	5.46
106-30-9	158.24	91.5	101.9	213	1870	416	208	33.9	142	5.01	3.32
106-32-1	172.27	31.4	33.39	195	1870	416	208	28.6	161.6	5.095	3.81
106-33-2	228.38	1.17	0.4128	332	3240	720	360	17.5	644.7	6.501	5.78
106-35-4	114.19	781	3511	328	3240	720	360	32.5	25.41	4.16	1.73
106-36-5	116.16	1870	2745	211	3240	720	360	63.9	78.99	3.635	1.85
106-42-3	106.17	916	228.6	162	3240	720	360	18	425.4	3.7	3.09
106-44-5	108.14	16.6	9246	460	3240	720	360	5.41	0.1934	6.328	2.06
106-46-7	147	88	90.24	384	8100	1800	900	802	143.3	4.446	3.28
106-47-8	127.57	3.16	2572	923	8100	1800	900	5.97	0.1567	6.154	1.72
106-48-9	128.56	5.35	3222	494	3240	720	360	26	0.2133	6.981	2.16
106-49-0	107.16	0.188	7225	438	3240	720	360	1.94	0.002788	5.473	1.62
106-50-3	108.14	0.0873	199000	1290	8100	1800	900	1.46	4.745e-05	7.26	-0.39
106-51-4	108.1	3.42	74480	223	3240	720	360	32.6	0.004954	1.908	0.25
106-63-8	128.17	1220	1188	166	3240	720	360	16.7	131.5	3.73	2.13
106-65-0	146.14	57.5	39620	576	3240	720	360	183	0.2124	4.995	0.4
106-68-3	128.22	312	1186	336	3240	720	360	27.6	33.73	4.495	2.22
106-69-4	134.18	0.0106	405000	347	1870	416	208	11.2	3.49e-06	5.448	-0.77
106-70-7	130.19	547	925.9	190	1870	416	208	54.4	76.86	4.164	2.34
106-72-9	140.23	101	212	234	3240	720	360	0.496	66.93	4.719	3.04
106-73-0	144.22	172	308.7	181	1870	416	208	41.9	80.35	4.359	2.83
106-79-6	230.31	1.48	41.65	484	3240	720	360	26.7	8.183	7.257	3.35
106-86-5	124.18	292	1621	333	3240	720	360	5.65	22.37	4.134	2.43
106-88-7	72.11	24700	24650	256	3240	720	360	134	72.15	2.993	0.86
106-91-2	142.16	82.9	16520	395	3240	720	360	8.26	0.7136	5.702	0.81
106-97-8	58.12	241000	135.6	96.4	1870	416	208	101	43430	1.301	2.31
106-99-0	54.09	274000	792.3	67.7	3240	720	360	3.46	6917	1.512	2.03
107-02-8	56.06	35200	139700	217	3240	720	360	12.7	14.12	2.292	0.19
107-03-9	76.16	19200	3780	93.4	3240	720	360	5.31	386.8	2.588	1.76
107-06-2	98.96	10000	6414	244	8100	1800	900	1040	155.1	2.797	1.83
107-10-8	59.11	41400	543800	380	3240	720	360	7.78	4.507	3.698	0.34
107-13-1	53.06	13000	45290	258	3240	720	360	61.4	15.23	2.499	0.21
107-15-3	60.1	2380	1000000	629	3240	720	360	4.05	0.1434	5.11	-1.62
107-18-6	58.08	3120	317700	337	3240	720	360	6.53	0.5703	3.86	0.21
107-21-1	62.07	8.12	1000000	328	1870	416	208	33.3	0.000504	4.25	-1.2
107-22-2	58.04	38400	1000000	575	3240	720	360	22.5	2.229	5.206	-1.66
107-31-3	60.05	78900	129300	234	3240	720	360	1130	36.66	2.07	-0.17
107-35-7	125.14	2.33e-05	1000000	587	3240	720	360	7.79	2.92e-09	6.793	-3.36
107-37-9	175.52	1770	211.8	112	3240	720	360	6.66	1469	3.393	2.85
107-41-5	118.18	7.77	32560	374	3240	720	360	18.1	0.02821	5.36	0.58
107-43-7	118.16	1.82e-06	1000000	391	1870	416	208	23.7	2.14e-10	8.667	-4.93
107-46-0	162.38	5210	0.9168	137	3240	720	360	186	923300	4.982	5.25
107-50-6	519.09	3.55	0.001462	1730	13000	2880	1440	123	1259000	9.254	10.22
107-51-7	236.54	465	0.02701	163	8100	1800	900	214	4075000	4.473	6.7
107-54-0	126.2	113	8112	725	8100	1800	900	17.4	1.765	5.855	1.85
107-64-2	586.52	2.55e-12	4.04e-09	1540	8100	1800	900	3.72	0.3701	18.104	12.52
107-71-1	132.16	1550	5361	206	8100	1800	900	472	38.13	2.811	1.44
107-74-4	174.29	0.0736	393.9	384	3240	720	360	15.1	0.03256	6.828	2.54
107-75-5	172.27	0.773	3042	959	8100	1800	900	6.51	0.04379	8.12	2.11
107-85-7	87.17	5930	109700	403	3240	720	360	7.17	4.714	4.267	1.25
107-86-8	84.12	1110	13420	302	3240	720	360	4.45	6.978	3.594	1.15
107-87-9	86.13	5260	21230	289	3240	720	360	55.1	21.31	3.376	0.75
107-88-0	90.12	4.27	220400	384	1870	416	208	18	0.00175	6.722	-0.29
107-92-6	88.11	281	66060	286	1870	416	208	107	0.3752	5.45	1.07
107-95-9	89.09	3.21e-05	428500	393	1870	416	208	7.76	6.68e-09	5.465	-4.09
107-96-0	106.14	20.6	119400	377	1870	416	208	5.99	0.01837	6.407	0.52
107-97-1	89.09	3.78e-05	252000	365	1870	416	208	3.6	1.34e-08	4.216	-2.94
107-98-2	90.12	984	1000000	354	3240	720	360	13.8	0.08867	3.935	-0.49
108-01-0	89.14	437	1000000	348	3240	720	360	2.85	0.03898	3.877	-0.94
108-05-4	86.09	15800	30250	140	3240	720	360	9.17	45.15	2.41	0.73
108-10-1	100.16	2900	8888	255	3240	720	360	18.2	32.75	3.559	1.16
108-11-2	102.18	498	13800	312	3240	720	360	20.1	3.692	4.42	1.68
108-16-7	103.17	675	786500	525	3240	720	360	2.92	0.08849	7.217	-0.52
108-21-4	102.13	8110	9268	213	3240	720	360	75.5	89.33	3.224	1.28
108-22-5	100.12	5680	9522	92.1	3240	720	360	3.65	59.72	2.406	1.28
108-29-2	100.12	5.02e-08	93810	508	3240	720	360	68.6	5.35e-11	2.365	0.11
108-31-6	98.06	22.1	4912	361	3240	720	360	83.3	0.4418	5.414	1.62
108-32-7	102.09	5.55	258200	563	3240	720	360	67.8	0.002198	5.441	0.08
108-38-3	106.17	883	207.2	155	3240	720	360	10.9	452.2	3.732	3.09
108-39-4	108.14	22.3	8890	459	3240	720	360	3.98	0.2708	6.416	2.06
108-42-9	127.57	10.2	2331	918	8100	1800	900	3.39	0.556	6.268	1.72
108-46-3	110.11	0.016	85710	760	3240	720	360	1.28	2.055e-05	9.194	1.03
108-47-4	107.16	359	52980	980	8100	1800	900	91.9	0.7281	5.46	1.9
108-48-5	107.16	702	81510	967	8100	1800	900	91.9	0.9237	5.051	1.9
108-50-9	108.14	234	38160	470	3240	720	360	140	0.6612	4.378	1.03
108-59-8	132.12	120	99510	448	3240	720	360	489	0.1597	4.718	-0.09
108-63-4	370.58	0.00353	0.0005452	289	1870	416	208	10.1	2401	10.796	8.12
108-64-5	130.19	1060	1070	187	3240	720	360	54.2	129.4	3.797	2.26
108-65-6	132.16	674	29970	358	3240	720	360	21.6	2.969	4.412	0.52
108-67-8	120.2	268	120.3	206	8100	1800	900	4.46	267.8	3.865	3.63
108-68-9	122.17	3.08	3687	461	3240	720	360	2.27	0.102	6.95	2.61
108-75-8	121.18	202	49170	995	8100	1800	900	36.7	0.4994	5.323	2.45
108-78-1	126.12	1.19e-05	1000000	1370	8100	1800	900	389	1.5e-09	10.754	-0.38
108-82-7	144.26	44.5	613.8	319	3240	720	360	13.7	10.47	5.358	3.08
108-83-8	142.24	287	528.8	348	3240	720	360	9.33	77.1	4.88	2.56
108-84-9	144.22	600	412.1	213	3240	720	360	31.5	210	4.302	2.68
108-87-2	98.19	5550	28.4	85.4	3240	720	360	24.7	19180	2.365	3.59
108-88-3	92.14	3160	573.1	153	3240	720	360	43	508	3.296	2.54
108-89-4	93.13	664	221400	950	8100	1800	900	233	0.2793	4.83	1.35
108-90-7	112.56	1240	400.5	230	3240	720	360	333	347.3	3.736	2.64
108-93-0	100.16	86.6	33660	375	3240	720	360	14.7	0.2579	4.975	1.64
108-94-1	98.15	539	24080	389	3240	720	360	40.2	2.195	4.244	1.13
108-95-2	94.11	43	26160	478	3240	720	360	9.76	0.1549	6.326	1.51
108-98-5	110.17	217	765.5	361	3240	720	360	22.9	31.28	4.383	2.69
108-99-6	93.13	702	230300	941	8100	1800	900	233	0.2841	4.7	1.35
109-05-7	99.18	2090	50930	414	3240	720	360	2.56	4.05	4.641	1.61
109-06-8	93.13	1380	274900	931	8100	1800	900	233	0.4652	4.5	1.35
109-08-0	94.12	972	80380	477	3240	720	360	348	1.138	4.256	0.49
109-13-7	160.21	369	680.1	192	8100	1800	900	179	87	3.466	2.34
109-15-9	200.32	7.25	4.064	245	3240	720	360	23	357.5	5.756	4.72
109-16-0	286.33	0.126	365.5	660	3240	720	360	2.88	0.09859	10.308	1.66
109-17-1	330.38	17.5	532.8	1180	8100	1800	900	2.49	10.83	11.626	1.39
109-19-3	158.24	139	117.8	172	1870	416	208	33.6	186.3	4.656	3.25
109-20-6	238.37	0.48	0.2633	392	3240	720	360	0.261	434.5	6.516	5.88
109-21-7	144.22	235	308.7	172	1870	416	208	24.2	109.6	4.381	2.83
109-25-1	200.32	7.25	4.064	264	3240	720	360	21.6	357.5	5.756	4.72
109-28-4	366.64	1.78e-07	0.003964	1990	8100	1800	900	0.884	0.01652	14.273	7.13
109-29-5	254.42	0.0033	0.04727	438	3240	720	360	12.5	17.8	7.55	6.65
109-38-6	384.65	2.54e-05	3.372e-05	486	3240	720	360	6.02	289	11.045	9.43
109-42-2	240.39	0.274	0.1556	394	3240	720	360	4.93	422.2	6.926	6.13
109-43-3	314.47	0.0238	0.04224	373	1870	416	208	14	176.7	12.003	6.3
109-49-9	98.15	1670	15930	335	3240	720	360	6.1	10.27	3.472	1.1
109-52-4	102.13	95.6	18600	284	1870	416	208	62.4	0.5249	6.105	1.56
109-53-5	100.16	11400	3251	97.6	3240	720	360	4.54	352	2.792	1.82
109-60-4	102.13	4680	10060	234	3240	720	360	75.5	47.51	3.29	1.36
109-66-0	72.15	68400	49.76	88	1870	416	208	65.2	99170	1.682	2.8
109-73-9	73.14	12600	202900	258	1870	416	208	7.46	4.551	4.118	0.83
109-79-5	90.18	5330	1404	86.5	1870	416	208	5.03	341.7	3.011	2.25
109-80-8	108.22	181	3880	404	3240	720	360	3.04	5.057	3.876	1.7
109-83-1	75.11	115	1000000	585	3240	720	360	3.24	0.008622	6.542	-1.15
109-86-4	76.1	748	1000000	383	3240	720	360	20.5	0.05692	4.1	-0.91
109-87-5	76.1	54900	132900	213	3240	720	360	52.4	31.45	2.15	-0.19
109-89-7	73.14	31400	436900	368	3240	720	360	3.18	5.267	3.562	0.81
109-92-2	72.11	69600	17410	73.5	3240	720	360	1.39	288.3	1.697	0.91
109-94-4	74.08	32800	85110	198	3240	720	360	252	28.55	2.033	0.32
109-95-5	75.07	131000	8968	403	3240	720	360	317	848.2	3.819	1.37
109-97-7	67.09	1350	31170	415	3240	720	360	2.06	2.898	3.883	0.88
109-99-9	72.11	23100	54480	293	3240	720	360	15.9	30.53	3	0.94
110-01-0	88.17	2000	5303	310	3240	720	360	8.84	33.25	3.212	1.79
110-02-1	84.14	9840	3654	151	3240	720	360	26.9	226.6	2.842	1.81
110-05-4	146.23	3650	89.51	174	8100	1800	900	256	5968	3.155	3.45
110-13-4	114.15	91.7	179100	574	3240	720	360	36	0.05846	5.472	-0.81
110-15-6	118.09	0.0144	807900	409	1870	416	208	92.9	2.11e-06	10.246	-0.75
110-16-7	116.07	1.26e-09	104200	405	1870	416	208	29.3	1.4e-12	10.718	0.05
110-17-8	116.07	1.26e-09	104200	405	1870	416	208	29.3	1.4e-12	10.718	0.05
110-19-0	116.16	2440	3128	189	3240	720	360	46.7	90.6	3.511	1.77
110-25-8	353.55	2.31e-07	0.008645	595	3240	720	360	1.18	0.009433	14.402	6.83
110-27-0	270.46	0.108	0.01354	358	3240	720	360	13.3	2162	7.592	7.17
110-30-5	593.04	1.06e-15	2.05e-10	1160	8100	1800	900	3.64	0.003075	19.195	13.98
110-31-6	589.01	6.17e-16	5.07e-10	1080	8100	1800	900	0.612	0.0007167	18.878	13.55
110-33-8	314.47	0.0238	0.04224	373	1870	416	208	14	176.7	12.003	6.3
110-34-9	312.54	0.00422	0.0004265	436	3240	720	360	11.1	3087	8.702	8.65
110-38-3	200.32	5.7	3.517	294	3240	720	360	21.7	325	5.826	4.79
110-39-4	200.32	4.64	3.517	294	3240	720	360	21.6	264.3	5.826	4.79
110-40-7	258.36	0.199	4.231	481	3240	720	360	20.5	12.21	7.99	4.33
110-41-8	184.32	199	5.372	168	3240	720	360	6.87	6816	5.998	4.67
110-42-9	186.3	14.2	8.787	263	3240	720	360	24.8	302.5	5.485	4.3
110-43-0	114.19	655	2145	277	3240	720	360	21.9	34.85	4.141	1.73
110-44-1	112.13	1.32	19440	272	1870	416	208	2.58	0.00759	5.961	1.62
110-45-2	116.16	1790	3543	169	3240	720	360	43	58.57	3.28	1.72
110-54-3	86.18	20000	17.24	81.2	1870	416	208	45.8	99970	2.033	3.29
110-58-7	87.17	4150	68760	263	1870	416	208	7.17	5.256	4.493	1.33
110-62-3	86.13	4390	9718	163	1870	416	208	9.01	38.88	3.531	1.31
110-63-4	90.12	0.725	636200	388	1870	416	208	23	0.0001027	6.445	-0.22
110-66-7	104.21	1550	518.5	76.6	1870	416	208	5.63	313.5	3.046	2.74
110-73-6	89.14	59.4	1000000	591	3240	720	360	2.96	0.0053	6.699	-0.66
110-74-7	88.11	11200	24590	187	3240	720	360	108	40.13	2.58	0.81
110-80-5	90.12	414	755100	368	3240	720	360	16.7	0.04933	4.396	-0.42
110-81-6	122.24	442	358.7	161	3240	720	360	1.07	150.4	3.916	2.86
110-82-7	84.16	12500	43.02	91.7	3240	720	360	34.3	24490	2.652	3.18
110-85-0	86.14	94.9	1000000	670	3240	720	360	1.52	0.008177	5.546	-0.8
110-86-1	79.1	2580	729800	459	3240	720	360	694	0.2789	3.997	0.8
110-89-4	85.15	3850	249400	418	3240	720	360	2.9	1.315	4.58	1.19
110-93-0	126.2	238	1651	361	3240	720	360	0.493	18.14	4.122	2.06
110-94-1	132.12	0.0436	396100	420	1870	416	208	61.5	1.454e-05	9.242	-0.26
110-98-5	134.18	0.973	310700	559	3240	720	360	8.19	0.0004203	6.195	-0.64
111-01-3	422.83	0.0367	2.04e-10	307	8100	1800	900	6.35	75920000000	9.834	14.63
111-02-4	410.73	0.000152	6.65e-10	1050	8100	1800	900	0.0873	93930000	9.974	14.12
111-03-5	356.55	2.12e-07	0.01931	478	3240	720	360	1.21	0.003914	12.26	6.4
111-05-7	339.57	1.87e-09	0.02498	518	3240	720	360	1.18	2.537e-05	14.665	6.39
111-06-8	312.54	0.00985	0.0003691	446	3240	720	360	11.1	8343	8.772	8.72
111-11-5	158.24	68.4	101.9	194	1870	416	208	34	106.2	4.815	3.32
111-12-6	154.21	18.4	433.9	254	1870	416	208	17.1	6.539	4.984	2.6
111-13-7	128.22	249	884.2	305	3240	720	360	23.3	36.15	4.484	2.22
111-14-8	130.19	15.6	1955	281	1870	416	208	37	1.039	6.996	2.54
111-15-9	132.16	397	28270	360	3240	720	360	19.7	1.851	4.473	0.59
111-17-1	178.2	0.0019	197400	442	1870	416	208	11.5	1.72e-06	11.324	-0.18
111-20-6	202.25	0.000885	1420	461	1870	416	208	22.8	0.0001261	11.107	2.19
111-26-2	101.19	1180	20570	268	1870	416	208	6.89	5.785	5.02	1.82
111-27-3	102.18	117	6885	243	1870	416	208	20.5	1.743	5.185	1.82
111-28-4	98.15	40.2	24750	237	1870	416	208	0.578	0.1597	4.733	1.39
111-29-5	104.15	0.557	66330	262	1870	416	208	20.4	0.000875	5.173	0.27
111-30-8	100.12	251	167200	489	3240	720	360	10.8	0.1501	5.167	-0.18
111-31-9	118.24	510	177.1	107	3240	720	360	5.46	340.9	3.585	3.23
111-34-2	100.16	7350	2813	89.9	1870	416	208	4.69	261.6	2.944	1.89
111-40-0	103.17	33.9	1000000	700	3240	720	360	1.74	0.003494	8.767	-2.13
111-41-1	104.15	0.878	1000000	600	3240	720	360	2.14	9.137e-05	9.217	-2.13
111-46-6	106.12	0.354	1000000	381	1870	416	208	8.56	3.763e-05	5.611	-1.47
111-47-7	118.24	742	351.1	181	3240	720	360	12.8	250.1	3.758	2.88
111-48-8	122.18	0.0323	340000	573	3240	720	360	9.19	1.159e-05	6.491	-0.62
111-49-9	99.18	929	44080	432	3240	720	360	2.85	2.088	5.28	1.68
111-57-9	327.56	2.57e-09	0.04389	587	3240	720	360	6.52	1.92e-05	14.533	6.19
111-58-0	325.54	1.97e-09	0.06886	511	3240	720	360	1.2	9.27e-06	14.369	5.97
111-60-4	328.54	8.77e-06	0.01711	535	3240	720	360	9.35	0.1684	11.75	7.26
111-61-5	312.54	0.00836	0.0003691	446	3240	720	360	11.1	7078	8.772	8.72
111-62-6	310.52	0.0081	0.000579	463	3240	720	360	1.3	4340	8.617	8.51
111-65-9	114.23	1980	1.152	74	1870	416	208	29.6	195700	3.062	4.27
111-66-0	112.22	2210	3.885	71.5	3240	720	360	6.33	63540	3.161	4.13
111-67-1	112.22	2030	4.371	52.8	1870	416	208	1.4	52030	3.026	4.06
111-70-6	116.21	39.8	1940	250	1870	416	208	18.7	2.388	5.734	2.31
111-71-7	114.19	469	1167	152	1870	416	208	8.49	45.92	4.247	2.29
111-76-2	118.18	63.3	64470	242	1870	416	208	13.8	0.1161	5.014	0.57
111-77-3	120.15	15	1000000	587	3240	720	360	9.87	0.001794	6.396	-1.18
111-79-5	170.25	20.8	52.1	236	1870	416	208	8.03	67.96	5.212	3.6
111-80-8	168.24	9.99	142.5	257	1870	416	208	15.7	11.79	5.361	3.1
111-81-9	198.31	4.04	4.709	359	3240	720	360	5.38	170.1	5.826	4.66
111-82-0	214.35	1.45	0.8841	309	3240	720	360	19.5	352.3	6.324	5.28
111-84-2	128.26	661	0.4058	72.2	1870	416	208	25.2	209000	3.507	4.76
111-87-5	130.23	13.2	814	257	1870	416	208	17.8	2.112	5.999	2.81
111-90-0	134.18	12.5	828000	447	3240	720	360	4.49	0.002027	5.5	-0.69
112-00-5	263.9	1.24e-06	1795	802	3240	720	360	9	1.82e-07	9.634	1.22
112-02-7	320.01	3.73e-08	16.33	868	3240	720	360	7.51	7.32e-07	11.152	3.18
112-03-8	348.06	7.13e-09	1.759	2510	8100	1800	900	6.94	1.41e-06	11.846	4.17
112-04-9	387.94	0.00132	5.21e-06	914	8100	1800	900	10.8	98550	8.929	10.36
112-05-0	158.24	2.85	207.8	280	1870	416	208	26.3	2.173	7.599	3.52
112-06-1	158.24	68.1	77.35	184	1870	416	208	29	139.4	4.866	3.32
112-07-2	160.21	71.5	3103	252	1870	416	208	12.1	3.696	5.221	1.57
112-10-7	326.57	0.00719	0.0001341	432	3240	720	360	10.3	17530	9.069	9.14
112-11-8	324.55	0.00154	0.0002104	457	3240	720	360	1.29	2365	8.905	8.92
112-12-9	170.3	14.9	19.71	432	3240	720	360	18.6	129	6.675	3.69
112-14-1	172.27	29.1	33.39	192	1870	416	208	25	150	5.095	3.81
112-15-2	176.21	18.9	30890	524	3240	720	360	8.83	0.108	6.349	0.32
112-17-4	200.32	5	3.517	289	3240	720	360	19.6	284.8	5.826	4.79
112-18-5	213.41	2.12	8.575	376	3240	720	360	2.75	52.76	6.913	5.44
112-19-6	212.34	1.74	1.517	370	3240	720	360	5.09	244.5	6.192	5.15
112-23-2	144.22	141	344.7	141	1870	416	208	29.2	59.13	4.041	2.77
112-24-3	146.24	1.49	1000000	736	3240	720	360	1.11	0.0002184	11.77	-2.65
112-25-4	146.23	6.05	6577	248	1870	416	208	9.75	0.1346	5.754	1.55
112-27-6	150.18	0.0265	1000000	640	3240	720	360	7.06	3.98e-06	7.139	-1.75
112-30-1	158.29	1.45	28.21	269	1870	416	208	16.7	8.154	7.453	3.79
112-31-2	156.27	31.4	43.52	141	3240	720	360	7.44	112.5	4.893	3.76
112-32-3	158.24	51.1	113.8	147	1870	416	208	25.1	71	4.408	3.26
112-34-5	162.23	1.46	71920	352	1870	416	208	3.45	0.003278	7.091	0.29
112-35-6	164.2	0.463	1000000	640	3240	720	360	6.41	7.596e-05	7.924	-1.46
112-36-7	162.23	122	31050	434	3240	720	360	9.58	0.6346	5.733	0.5
112-37-8	186.3	0.694	21.39	281	1870	416	208	20.4	6.05	7.963	4.51
112-38-9	184.28	0.935	65.84	449	3240	720	360	5.29	2.616	7.53	4.37
112-39-0	270.46	0.0634	0.00905	399	3240	720	360	13.6	1893	7.802	7.25
112-40-3	170.34	31.5	0.1099	72.1	1870	416	208	18.1	48770	3.576	6.23
112-41-4	168.33	35.6	0.1127	82.8	3240	720	360	5.15	53170	4.196	6.1
112-42-5	172.31	0.68	43.04	267	1870	416	208	15.3	2.722	6.808	4.28
112-43-6	170.3	0.434	57.53	424	3240	720	360	4.87	1.283	6.795	4.14
112-44-7	170.3	8.11	14.27	195	3240	720	360	7.15	96.74	5.699	4.25
112-45-8	168.28	8.71	19.08	289	3240	720	360	3.58	76.78	5.698	4.12
112-47-0	174.29	0.00338	274	386	3240	720	360	13.1	0.002146	7.018	2.73
112-53-8	186.34	0.242	6.898	452	3240	720	360	14.1	6.519	8.172	4.77
112-54-9	184.32	2.06	4.649	211	3240	720	360	6.88	81.4	6.078	4.75
112-57-2	189.31	0.028	1000000	760	3240	720	360	0.811	5.3e-06	14.783	-3.16
112-60-7	194.23	0.00149	1000000	640	3240	720	360	5.1	2.9e-07	8.677	-2.02
112-61-8	298.51	0.00438	0.0009266	437	3240	720	360	11.8	1409	8.526	8.23
112-62-9	296.5	0.0153	0.005588	467	3240	720	360	1.31	813.5	7.68	8.02
112-63-0	294.48	0.0126	0.01981	485	3240	720	360	0.693	187.1	7.108	7.8
112-65-2	227.4	0.00227	7.542	776	3240	720	360	2.36	0.06834	11.564	4.24
112-66-3	228.38	1.62	0.3631	328	3240	720	360	16.1	1015	6.571	5.78
112-69-6	269.52	0.0381	0.08883	1050	8100	1800	900	2.6	115.7	8.39	7.41
112-70-9	200.37	0.0316	4.533	431	3240	720	360	13.1	1.397	7.541	5.26
112-72-1	214.39	0.0269	0.8449	435	3240	720	360	12.2	6.8	8.214	5.75
112-75-4	241.46	0.268	0.8787	870	8100	1800	900	2.67	73.64	7.647	6.42
112-79-8	282.47	0.00684	0.01151	470	3240	720	360	1.3	167.8	10.377	7.73
112-80-1	282.47	0.00684	0.01151	470	3240	720	360	1.3	167.8	10.377	7.73
112-84-5	337.59	1.1e-05	0.0004516	1380	8100	1800	900	1.24	8.252	12.375	8.44
112-85-6	340.6	6.52e-05	6.048e-05	474	3240	720	360	9.12	367.2	12.1	9.91
112-86-7	338.58	0.000153	9.491e-05	463	3240	720	360	1.27	547	11.935	9.69
112-90-3	267.5	8.98e-05	0.07639	603	3240	720	360	1.12	0.3142	8.973	7.5
112-92-5	270.5	0.000244	0.0151	469	3240	720	360	9.62	4.371	9.184	7.72
112-95-8	282.56	0.0413	9.41e-06	138	3240	720	360	10.2	1241000	6.593	10.16
113-24-6	110.05	7.84e-06	1000000	389	1870	416	208	2520	8.63e-10	1.998	-5.05
113-48-4	275.39	9.79e-05	11.78	471	3240	720	360	0.898	0.002288	8.634	3.76
114-63-6	160.11	4.91e-09	1000000	644	3240	720	360	8.41	7.86e-13	7.235	-2.1
115-07-1	42.08	939000	1162	70.2	3240	720	360	6.97	3669	0.866	1.68
115-10-6	46.07	513000	109300	141	3240	720	360	86.1	42.71	1.488	0.07
115-18-4	86.13	3120	48740	317	3240	720	360	3.46	5.513	4.15	1.08
115-21-9	163.51	4890	484.8	149	3240	720	360	215	1650	3.038	2.5
115-29-7	406.92	0.000166	1.487	4480	38900	8640	4320	31.3	0.0456	6.406	3.5
115-32-2	370.49	9.18e-06	0.7772	6680	38900	8640	4320	74.8	0.004379	10.025	5.81
115-39-9	669.96	3.61e-15	0.0003516	14200	38900	8640	4320	72.5	6.86e-09	23.438	6.77
115-69-5	105.14	0.159	1000000	587	3240	720	360	8.7	1.668e-05	7.914	-1.1
115-70-8	119.17	0.264	1000000	587	3240	720	360	8.38	3.146e-05	8.29	-0.6
115-71-9	220.36	0.00451	6.414	1060	8100	1800	900	0.517	0.1548	8.245	4.96
115-77-5	136.15	3.38e-06	1000000	382	1870	416	208	15.4	4.59e-10	6.087	-1.77
115-83-3	1202.03	2e-25	3.62e-30	1740	13000	2880	1440	2.76	4.42e+19	33.927	32.28
115-84-4	160.26	0.0806	1042	260	1870	416	208	18.6	0.01241	6.541	2.13
115-86-6	326.29	6.29e-05	1.034	1330	8100	1800	900	23.7	0.01986	8.459	4.7
115-95-7	196.29	17.5	20.12	398	8100	1800	900	0.494	170.4	5.078	4.39
115-96-8	285.49	0.0522	877.9	1490	13000	2880	1440	11.7	0.01695	5.311	1.63
115-99-1	182.26	26.6	28.25	272	8100	1800	900	0.494	172	4.852	3.84
116-02-9	142.24	6.07	840.8	403	3240	720	360	14.2	1.026	6.258	2.93
116-09-6	74.08	232	1000000	351	3240	720	360	85	0.01719	2.72	-0.78
116-25-6	158.16	1.13e-06	68650	640	3240	720	360	15.5	2.6e-09	8.212	-1.53
116-26-7	150.22	21.2	134.2	479	8100	1800	900	1.63	23.73	5.478	3.22
116-31-4	284.45	0.00254	0.004883	1000	8100	1800	900	0.592	148.3	8.917	7.6
116-53-0	102.13	149	28110	265	1870	416	208	67.7	0.5425	5.401	1.49
116-75-6	474.61	9.85e-13	4.17e-08	8490	38900	8640	4320	1.28	0.0112	24.92	10.87
116-81-4	382.19	6.39e-13	0.2573	2600	13000	2880	1440	243	9.49e-10	18.328	1.26
116-82-5	318.13	4.08e-08	0.1401	2950	13000	2880	1440	18.2	9.264e-05	15.981	4.36
117-22-6	224.23	1.2e-07	173600	755	3240	720	360	15.9	1.56e-10	11.81	-0.47
117-39-5	302.24	3.73e-13	2472	771	3240	720	360	0.761	4.55e-14	20.049	1.48
117-42-0	383.36	2.35e-19	9563	1940	8100	1800	900	106	9.41e-21	21.312	-2.8
117-59-9	224.23	1.2e-07	173600	755	3240	720	360	15.9	1.56e-10	11.81	-0.47
117-62-4	303.31	2.14e-13	4494	1840	8100	1800	900	26.5	1.45e-14	15.93	-1.85
117-68-0	363.23	2.74e-09	5117	1150	8100	1800	900	1.98	1.95e-10	31.284	-1.53
117-80-6	227.05	0.000525	173.8	1830	8100	1800	900	186	0.0006862	10.03	2.65
117-81-7	390.57	0.0027	0.001132	616	3240	720	360	11.7	933.8	12.557	8.39
117-83-9	366.46	0.289	1.675	781	3240	720	360	6.04	63.3	11.977	4.06
117-84-0	390.57	0.000194	0.0004236	543	3240	720	360	12.5	178.2	12.079	8.54
117-98-6	262.4	0.0232	0.2318	411	3240	720	360	0.148	26.26	6.809	5.78
118-00-3	283.25	3.3e-17	31530	640	3240	720	360	2.54	2.97e-19	21.87	-1.71
118-03-6	383.36	2.35e-19	1000000	1940	8100	1800	900	106	9e-23	12.152	-2.8
118-12-7	173.26	2.35	28.41	886	8100	1800	900	5.24	14.31	6.097	3.89
118-32-1	304.29	4.22e-13	714200	782	3240	720	360	67.4	1.8e-16	16.893	-1.42
118-47-8	284.24	1.19e-11	272.6	640	3240	720	360	66.4	1.24e-11	13.885	-1.83
118-52-5	197.02	0.00321	14210	716	8100	1800	900	83.9	4.436e-05	3.44	-0.94
118-55-8	214.22	0.000617	76.7	476	3240	720	360	7.89	0.001724	7.983	3.82
118-56-9	262.35	0.000373	0.4195	1100	8100	1800	900	5.99	0.2326	9.263	6.16
118-57-0	271.27	9.98e-08	216.2	1780	8100	1800	900	6.46	1.25e-07	13.033	2.93
118-58-1	228.25	0.0024	24.59	513	3240	720	360	14.9	0.02228	9.134	4.31
118-60-5	250.34	0.000951	0.7171	474	3240	720	360	11.8	0.3319	8.84	5.97
118-61-6	166.18	4.15	737.1	452	3240	720	360	20.4	0.9348	6.557	3.09
118-65-0	204.36	4.16	0.05011	207	8100	1800	900	0.0233	16960	4.85	6.3
118-71-8	126.11	0.00571	79760	328	3240	720	360	4.12	9.02e-06	3.663	-0.19
118-72-9	138.23	21.2	50.36	775	8100	1800	900	14.9	58.19	5.365	3.78
118-74-1	284.78	0.000407	0.1922	3720	38900	8640	4320	951	0.6025	6.888	5.86
118-75-2	245.88	0.000304	319.3	2620	13000	2880	1440	205	0.0002341	10.094	2.22
118-79-6	330.8	0.0404	9.127	2570	13000	2880	1440	540	1.464	9.968	4.18
118-82-1	424.67	1.59e-09	0.0001707	11500	38900	8640	4320	7.21	0.003947	17.015	8.99
118-93-4	136.15	9.36	7571	436	3240	720	360	8.38	0.1683	6.198	1.97
119-13-1	402.67	7.65e-06	3.84e-06	1660	13000	2880	1440	1.18	802.1	15.003	11.08
119-28-8	223.25	7.01e-08	1965	1690	8100	1800	900	5.83	7.97e-09	10.54	-0.91
119-36-8	152.15	7.12	1875	379	3240	720	360	23.2	0.5777	4.947	2.6
119-40-4	315.35	1.7e-11	74.3	1870	8100	1800	900	0.796	7.19e-11	16.521	0.83
119-47-1	340.51	3.3e-07	0.1235	6010	13000	2880	1440	6.28	0.0009116	15.013	7.97
119-53-9	212.25	7.7e-05	1856	561	3240	720	360	22.1	8.8e-06	7.425	1.84
119-61-9	182.22	0.121	103.3	500	3240	720	360	72.2	0.2131	7.281	3.15
119-63-1	164.21	0.023	3145	1240	8100	1800	900	4.5	0.001197	8.748	0.01
119-65-3	129.16	4.88	1551	525	3240	720	360	30.2	0.4064	6.631	2.14
119-70-0	279.32	9.53e-11	39850	1670	8100	1800	900	1.28	6.68e-13	14.801	-2.8
119-72-2	400.38	4.25e-17	47.3	1910	8100	1800	900	1.31	3.6e-16	20.133	-0.68
119-79-9	223.25	7.01e-08	1965	1690	8100	1800	900	5.83	7.97e-09	10.54	-0.91
119-84-6	148.16	1.1	11540	436	3240	720	360	50.7	0.01416	3.86	0.97
119-90-4	244.3	0.000945	723.9	1790	8100	1800	900	1.91	0.000319	12.941	2.08
119-93-7	212.3	0.00274	379.4	1860	8100	1800	900	1.36	0.001537	10.93	3.02
120-11-6	254.33	0.00182	2.344	1150	8100	1800	900	1.72	0.1982	8.962	4.66
120-12-7	178.24	0.000289	0.6905	1800	13000	2880	1440	6.42	0.07468	7.093	4.35
120-14-9	166.18	0.487	5820	561	8100	1800	900	9.18	0.01389	6.936	1.36
120-24-1	282.34	0.000302	1.526	1160	8100	1800	900	1.84	0.05575	9.682	4.69
120-25-2	180.21	0.417	2228	537	8100	1800	900	7.7	0.03375	7.223	1.85
120-32-1	218.68	0.00675	112	2000	8100	1800	900	14.4	0.01317	10.557	4.18
120-35-4	242.28	1.8e-06	668.1	1520	8100	1800	900	4.89	6.53e-07	13.842	1.86
120-37-6	151.21	0.344	2049	1660	8100	1800	900	1.23	0.02538	9.414	1.83
120-40-1	287.45	8.97e-07	49.91	708	3240	720	360	5.21	5.17e-06	12.944	2.89
120-45-6	178.23	5.7	157.2	455	3240	720	360	30.7	6.47	5.982	2.99
120-46-7	224.26	0.00628	232.6	1780	8100	1800	900	62.9	0.006054	9.781	2.51
120-47-8	166.18	0.0124	1894	742	3240	720	360	20.4	0.001087	9.178	2.49
120-50-3	178.23	5.55	98.34	446	3240	720	360	49.5	10.08	5.709	3.23
120-51-4	212.25	0.0741	15.39	567	3240	720	360	36.8	1.02	7.911	3.54
120-54-7	384.67	4.47e-08	157.6	1660	8100	1800	900	0.405	1.09e-07	5.357	4.43
120-55-8	314.34	10.6	25.61	783	3240	720	360	13.5	130.3	10.9	3.04
120-57-0	150.13	1.41	9612	387	3240	720	360	9.01	0.02207	5.69	1.77
120-61-6	194.19	0.0331	561.1	340	3240	720	360	447	0.01144	4.511	1.66
120-71-8	137.18	4.21	2810	858	8100	1800	900	1.28	0.2057	7.035	1.7
120-72-9	117.15	1.61	1529	463	3240	720	360	1.29	0.1236	6.806	2.05
120-75-2	149.21	6.86	366.3	500	3240	720	360	13.9	2.791	7.493	2.72
120-78-5	332.47	8.28e-08	0.06439	3550	8100	1800	900	0.814	0.0004275	15.679	4.66
120-80-9	110.11	0.148	73230	728	3240	720	360	2.47	0.0002225	8.189	1.03
120-82-1	181.45	24.4	19.99	947	13000	2880	1440	467	221.5	5.256	3.93
120-92-3	84.12	1600	60810	378	3240	720	360	87.3	2.213	3.768	0.63
120-93-4	86.09	1.72	26460	611	3240	720	360	32	0.005596	6.759	-0.74
120-94-5	85.15	11200	213100	367	3240	720	360	3.1	4.454	3.83	0.91
121-00-6	180.25	0.312	212.8	1060	8100	1800	900	7.12	0.2643	8.956	3.5
121-32-4	166.18	0.039	2867	630	3240	720	360	7.85	0.002264	9.927	1.55
121-33-5	152.15	0.0595	6875	623	3240	720	360	9.39	0.001319	8.266	1.05
121-34-6	168.15	0.000197	3770	655	3240	720	360	21.1	8.8e-06	11.994	1.22
121-39-1	192.22	0.728	320.1	537	3240	720	360	38.5	0.4371	7.602	2.55
121-44-8	101.19	7880	68260	486	8100	1800	900	2.77	11.68	3.665	1.51
121-47-1	173.19	2.7e-05	35620	640	3240	720	360	11.1	1.31e-07	8.36	-2.08
121-54-0	448.09	5.08e-12	0.5913	13100	38900	8640	4320	2.69	3.85e-09	18.006	4
121-69-7	121.18	66.6	1058	709	8100	1800	900	1.64	7.635	4.944	2.17
121-75-5	330.35	0.0165	78.45	610	3240	720	360	3.32	0.06962	9.059	2.29
121-79-9	212.2	5.43e-05	4176	776	3240	720	360	2.78	2.76e-06	16.35	1.79
121-87-9	172.57	0.0453	889.4	1640	8100	1800	900	65.4	0.008795	8.549	2.12
121-88-0	154.13	0.000361	10360	1660	8100	1800	900	27.3	5.38e-06	11.485	0.99
121-97-1	164.21	3.23	791.1	419	3240	720	360	11.8	0.6697	6.752	2.25
121-98-2	166.18	1.57	738.3	412	3240	720	360	32.3	0.3541	6.347	1.91
122-00-9	134.18	11.3	1424	441	3240	720	360	52.6	1.067	5.455	2.22
122-03-2	148.21	7.82	152.8	369	3240	720	360	12.4	7.591	6.142	3.17
122-18-9	396.11	1.24e-08	0.2147	3940	8100	1800	900	5.53	2.283e-05	13.906	4.89
122-19-0	424.16	1.59e-11	0.02082	3290	8100	1800	900	5.21	3.23e-07	14.639	5.87
122-20-3	191.27	0.00248	1000000	640	3240	720	360	2.07	4.74e-07	8.179	-1.22
122-25-8	288.26	1.07e-10	7.553	811	3240	720	360	7.94	4.07e-09	17.385	4.52
122-27-0	226.28	0.0127	16.59	1110	8100	1800	900	28.8	0.1735	7.467	3.84
122-32-7	885.46	6.86e-15	2.55e-20	1070	8100	1800	900	0.431	4628000000	24.696	23.29
122-34-9	201.66	0.00122	589.9	2390	13000	2880	1440	23.3	0.0004184	9.594	2.4
122-39-4	169.23	0.129	63.61	1030	8100	1800	900	1.32	0.3444	7.459	3.29
122-40-7	202.3	0.0603	8.545	456	3240	720	360	3.47	1.427	7.826	4.33
122-43-0	192.26	1.14	44.15	459	3240	720	360	31.7	4.987	6.419	3.55
122-45-2	248.37	0.0213	0.4678	467	3240	720	360	18.7	11.33	7.896	5.52
122-46-3	150.18	26.3	1243	406	3240	720	360	47.3	3.173	4.624	2.14
122-48-5	194.23	0.0338	3571	1660	8100	1800	900	6.06	0.001835	10.184	1.31
122-51-0	148.2	931	7297	379	3240	720	360	11.3	18.93	5.445	1.45
122-57-6	146.19	1.34	1345	461	3240	720	360	3.24	0.1449	6.39	2.04
122-59-8	152.15	0.111	13220	554	3240	720	360	9.76	0.001277	7.503	1.33
122-60-1	150.18	4.74	3172	444	3240	720	360	8.85	0.2241	6.083	1.61
122-62-3	426.69	0.000262	5.15e-06	486	3240	720	360	8.28	21770	12.264	10.08
122-63-4	164.21	17.5	416.4	473	3240	720	360	37.8	6.888	5.684	2.57
122-66-7	184.24	0.014	161.9	472	3240	720	360	3.01	0.01593	7.649	3.06
122-67-8	204.27	0.729	25.75	467	3240	720	360	7.14	5.785	7.162	3.76
122-68-9	266.34	0.000945	0.9383	1630	8100	1800	900	6.32	0.2683	9.668	5.05
122-69-0	264.33	0.00323	3.116	614	3240	720	360	1.66	0.2737	9.453	4.83
122-70-3	178.23	6.86	136	469	3240	720	360	31	8.981	6.052	3.06
122-71-4	270.37	0.00227	2.059	1180	8100	1800	900	6.84	0.2994	9.121	4.62
122-72-5	178.23	3.24	136	468	3240	720	360	27.6	4.246	6.052	3.06
122-73-6	178.28	7.23	41.57	455	3240	720	360	10.6	30.99	5.724	3.67
122-74-7	192.26	1.14	44.15	470	3240	720	360	26.4	4.987	6.419	3.55
122-78-1	120.15	47.2	3026	388	3240	720	360	9.76	1.874	5.43	1.54
122-79-2	136.15	58.7	4639	401	3240	720	360	125	1.722	4.067	1.59
122-80-5	150.18	0.0513	3169	1240	8100	1800	900	4.55	0.002433	10.13	0.18
122-84-9	164.21	1.37	3084	917	8100	1800	900	9.22	0.07312	6.564	1.55
122-91-8	166.18	6.16	2679	423	3240	720	360	9	0.3821	5.938	1.61
122-97-4	136.2	1.13	6969	507	3240	720	360	22.2	0.0221	6.961	2.06
122-99-6	138.17	0.598	28180	484	3240	720	360	7.86	0.002935	6.875	1.1
123-03-5	340	0.00046	246.6	3600	8100	1800	900	8.23	0.0006342	8.077	2.8
123-05-7	128.22	291	455.6	141	3240	720	360	7.56	81.8	4.218	2.71
123-07-9	122.17	5.71	2346	469	3240	720	360	6.13	0.2972	7.08	2.55
123-08-0	122.12	0.00602	26350	652	3240	720	360	9.17	2.787e-05	9.03	1.23
123-11-5	136.15	4.04	2728	340	3240	720	360	10.4	0.2016	6.249	1.79
123-15-9	100.16	2380	3930	157	3240	720	360	8.89	60.82	3.794	1.73
123-17-1	186.34	2.07	24.97	411	3240	720	360	11.1	15.42	6.885	4.48
123-18-2	184.32	45.8	21.58	272	3240	720	360	11	391.7	5.546	3.96
123-19-3	114.19	892	3511	353	3240	720	360	27.5	29.01	4.379	1.73
123-23-9	234.16	0.000493	221400	414	1870	416	208	73.9	5.2e-07	11.874	-0.57
123-25-1	174.2	19.7	5547	434	3240	720	360	63.6	0.6155	5.867	1.39
123-28-4	514.85	8.67e-07	4.94e-08	512	3240	720	360	4.93	9046	15.576	11.79
123-29-5	186.3	12.2	10.87	275	3240	720	360	24.7	208.6	5.461	4.3
123-30-8	109.13	0.00436	101200	733	3240	720	360	3.46	4.7e-06	7.873	0.24
123-31-9	110.11	0.00219	129500	766	3240	720	360	11.1	1.86e-06	9.304	1.03
123-32-0	108.14	423	31970	477	3240	720	360	255	1.434	4.468	1.03
123-34-2	132.16	0.74	163200	549	3240	720	360	3.96	0.0005992	6.662	-0.3
123-35-3	136.24	320	6.923	94.9	3240	720	360	0.186	6297	3.75	4.88
123-38-6	58.08	42200	42990	250	3240	720	360	13.1	57.1	3.113	0.33
123-42-2	116.16	65.2	651200	705	8100	1800	900	64.2	0.01163	4.632	-0.34
123-47-7	430.11	2.37e-16	1000000	1150	8100	1800	900	6.52	1.02e-19	8.855	-9.75
123-51-3	88.15	512	41580	341	3240	720	360	19.6	1.085	4.399	1.26
123-54-6	100.12	1160	53220	381	3240	720	360	223	2.18	4.417	0.05
123-63-7	132.16	2090	24140	316	3240	720	360	11.8	11.46	3.825	0.7
123-66-0	144.22	240	308.7	183	1870	416	208	41.7	112.1	4.359	2.83
123-68-2	156.23	96.1	136.1	189	1870	416	208	5.9	110.3	4.714	3.18
123-69-3	252.4	0.00299	0.5925	442	3240	720	360	0.986	1.272	6.327	5.37
123-72-8	72.11	14400	23850	223	3240	720	360	10.9	43.53	3.208	0.82
123-73-9	70.09	4200	41480	311	3240	720	360	6.82	7.096	3.701	0.6
123-75-1	71.12	8860	556400	402	3240	720	360	3.27	1.133	4.47	0.7
123-76-2	116.12	3.79	674600	391	1870	416	208	60.9	0.0006518	7.209	-0.49
123-77-3	116.08	0.00136	143700	733	3240	720	360	128	1.1e-06	8.775	-3.89
123-79-5	370.58	0.00162	0.0004083	304	1870	416	208	10.7	1476	13.011	8.26
123-81-9	210.26	0.835	21800	626	3240	720	360	3.51	0.00805	7.835	0.29
123-86-4	116.16	1590	3128	182	1870	416	208	52.4	58.92	3.72	1.85
123-91-1	88.11	5410	213900	350	3240	720	360	23.6	2.23	3.437	-0.32
123-92-2	130.19	756	1100	194	3240	720	360	42.7	89.47	3.87	2.26
123-93-3	150.15	0.00728	1000000	420	1870	416	208	18.8	1.09e-06	10.59	-1.16
123-94-4	358.57	1.7e-07	0.0123	533	3240	720	360	6.78	0.004936	12.423	6.62
123-95-5	340.6	0.0247	3.643e-05	452	3240	720	360	9.86	231800	9.506	9.7
123-96-6	130.23	32.3	990.9	219	1870	416	208	16.4	4.24	5.199	2.73
123-99-9	188.23	0.00305	5684	457	1870	416	208	26.1	0.0001011	10.61	1.7
124-03-8	334.03	1.63e-08	5.608	908	3240	720	360	6.15	9.77e-07	11.479	3.68
124-04-9	146.14	0.00171	167300	431	1870	416	208	45.9	1.49e-06	9.795	0.23
124-06-1	256.43	0.339	0.03693	374	3240	720	360	14.7	2351	7.305	6.76
124-07-2	144.22	6.51	495.9	281	1870	416	208	30.7	1.892	7.488	3.03
124-09-4	116.21	24.4	534300	742	3240	720	360	3.72	0.005307	7.232	0.35
124-10-7	242.41	0.339	0.08744	349	3240	720	360	16	938.8	7.078	6.27
124-12-9	125.22	37.1	233.7	378	3240	720	360	43.4	19.86	4.916	2.8
124-13-0	128.22	199	394.3	168	3240	720	360	8.11	64.6	4.457	2.78
124-17-4	204.27	4.74	3243	397	3240	720	360	7.28	0.2981	6.148	1.3
124-18-5	142.29	231	1.252	70.7	1870	416	208	22.1	26210	2.687	5.25
124-19-6	142.24	75.2	131.6	169	3240	720	360	7.76	81.27	4.793	3.27
124-20-9	145.25	0.0126	1000000	764	3240	720	360	1.69	1.83e-06	9.868	-0.66
124-22-1	185.36	0.85	45.13	437	3240	720	360	5.62	3.494	6.915	4.76
124-25-4	212.38	2.12	0.4852	252	3240	720	360	6.4	927.9	6.811	5.73
124-26-5	283.5	8.92e-05	0.02929	582	3240	720	360	9.5	0.8633	11.071	6.7
124-28-7	297.57	0.0223	0.008882	1110	8100	1800	900	2.52	745.9	9.124	8.39
124-30-1	269.52	0.0116	0.04875	565	3240	720	360	4.74	64.13	9.127	7.71
124-38-9	44.01	2370000	25720	146	3240	720	360	100000	173.4	1.037	0.83
124-40-3	45.08	196000	1000000	337	3240	720	360	3.78	4.568	2.76	-0.17
124-43-6	96.09	1.25e-14	4934	646	3240	720	360	100000	2.44e-16	23.946	0.09
124-68-5	89.14	66	1000000	594	3240	720	360	9.17	0.005883	6.837	-0.74
124-70-9	141.07	6880	499.8	82.4	3240	720	360	9.14	1942	2.719	2.6
124-76-5	154.25	0.0572	1186	833	8100	1800	900	22.5	0.007439	5.939	2.85
125-12-2	196.29	14.3	9.721	897	8100	1800	900	18.5	288.1	6.048	3.86
125-20-2	430.55	4.86e-13	0.006952	5370	13000	2880	1440	1.25	3.01e-08	19.831	7.06
125-46-2	344.32	2.49e-10	88.46	3730	13000	2880	1440	0.89	9.7e-10	21.818	2.78
126-00-1	286.33	4.06e-08	177.7	813	3240	720	360	3.08	6.55e-08	17.822	3.39
126-06-7	241.47	0.000472	8264	736	8100	1800	900	83.9	1.379e-05	3.539	-0.94
126-11-4	151.12	1.16e-05	803700	640	3240	720	360	133	2.18e-09	8.045	-1.66
126-13-6	846.93	8.78e-16	0.0001831	6330	13000	2880	1440	3.28	4.06e-09	29.783	5.03
126-14-7	678.6	2.12e-10	111.7	4080	8100	1800	900	3.52	1.29e-09	25.81	-0.42
126-15-8	204.27	0.179	2126	887	8100	1800	900	0.448	0.01717	5.996	1.51
126-19-2	416.65	3.89e-09	0.006622	2550	13000	2880	1440	3.67	0.0002441	14.311	7.11
126-30-7	104.15	0.332	82530	397	3240	720	360	29.7	0.0004189	5.063	0.16
126-58-9	254.28	2.31e-10	1000000	670	3240	720	360	6.59	5.9e-14	9.48	-2.61
126-64-7	258.36	0.0239	0.218	1010	8100	1800	900	0.493	28.28	7.692	5.84
126-71-6	266.32	1.71	16.22	465	3240	720	360	3.26	28.02	7.485	3.6
126-73-8	266.32	0.466	7.355	283	1870	416	208	3.26	16.85	8.239	3.82
126-86-3	226.36	0.00247	26.35	851	8100	1800	900	6.04	0.02119	8.611	3.61
126-90-9	154.25	11.1	683.7	792	8100	1800	900	0.457	2.503	6.026	3.38
126-91-0	154.25	11.1	683.7	792	8100	1800	900	0.457	2.503	6.026	3.38
126-92-1	232.27	3.01e-09	58430	599	3240	720	360	26	1.2e-11	5.265	-0.35
126-96-5	82.03	7.16e-07	1000000	355	1870	416	208	6090	5.87e-11	0.928	-3.72
126-97-6	153.2	1.63e-07	1000000	587	3240	720	360	5.17	2.49e-11	15.204	-3.27
127-09-3	82.03	7.16e-07	1000000	355	1870	416	208	6090	5.87e-11	0.928	-3.72
127-17-3	88.06	92.4	1000000	389	1870	416	208	413	0.008136	5.639	-1.24
127-18-4	165.83	2370	80.32	181	13000	2880	1440	1530	4900	3.54	2.97
127-25-3	316.49	0.00887	0.017	1940	13000	2880	1440	0.0267	165.1	7.804	6.75
127-39-9	332.35	5.2e-11	676.5	620	3240	720	360	25.1	2.55e-11	10.692	0.02
127-40-2	568.89	1.31e-15	5.63e-11	1620	13000	2880	1440	0.163	0.01319	17.038	14.82
127-41-3	192.3	3.62	24.67	869	8100	1800	900	0.459	28.27	5.981	4.29
127-42-4	206.33	0.868	3.328	903	8100	1800	900	0.466	53.81	6.788	4.78
127-43-5	206.33	0.599	2.579	906	8100	1800	900	0.459	47.89	6.935	4.91
127-47-9	328.5	0.000246	0.0003555	1090	8100	1800	900	0.307	226.7	9.139	8.63
127-51-5	206.33	1.3	2.98	874	8100	1800	900	0.338	89.73	6.777	4.84
127-65-1	227.64	6.32e-09	83720	1460	8100	1800	900	210	1.72e-11	2.953	-0.5
127-68-4	225.15	10.3	1000000	1220	8100	1800	900	4930	0.002326	6.78	-3.13
127-91-3	136.24	334	7.061	98.7	8100	1800	900	2.61	6457	3.342	4.35
128-37-0	220.36	0.236	5.748	1210	8100	1800	900	14	9.047	8.874	5.03
128-39-2	206.33	0.938	9.701	1150	8100	1800	900	5.23	19.96	8.736	4.48
128-44-9	205.16	3.43e-11	20950	483	3240	720	360	16.7	3.37e-13	6.427	-0.89
128-50-7	166.27	0.632	318.1	439	3240	720	360	0.516	0.3303	6.713	3.29
128-51-8	208.3	1.19	8.429	756	8100	1800	900	0.519	29.39	5.909	4.3
128-58-5	516.56	3.21e-17	4.2e-07	7470	38900	8640	4320	1.24	3.96e-08	24.127	9.39
128-69-8	392.33	1.09e-11	0.001194	9360	38900	8640	4320	34.8	3.6e-06	16.599	6.26
128-80-3	418.5	9.4e-11	6.98e-06	4630	13000	2880	1440	1.28	0.00564	22.911	8.69
128-81-4	307.27	4.32e-14	6.782	1480	13000	2880	1440	7.95	1.96e-12	21.982	2.47
128-95-0	238.25	1.51e-07	5.842	1520	8100	1800	900	3.75	6.14e-06	10.708	3.16
129-00-0	202.26	4.59e-05	0.2249	2340	13000	2880	1440	5.13	0.04125	8.193	4.93
129-17-9	567.68	1.15e-31	94580	4650	13000	2880	1440	0.171	8e-31	18.931	-5.34
129-96-4	364.25	3.6e-19	1000000	785	3240	720	360	21.6	1.31e-22	17.812	-4.48
130-13-2	245.23	2.07e-12	1000000	1390	8100	1800	900	5.84	5.07e-16	9.108	-2.69
130-17-6	320.38	2.46e-12	41.99	1850	8100	1800	900	3.2	1.88e-11	16.08	0.41
130-20-1	511.32	2.05e-15	9.36e-07	13900	38900	8640	4320	1.96	1.12e-06	29.158	9.02
130-40-5	478.33	2.74e-09	768800	1170	8100	1800	900	0.962	1.71e-12	20.955	-4.92
130-89-2	360.89	2.96e-13	161.6	2040	8100	1800	900	1.55	6.61e-13	22.435	1.78
130-95-0	324.43	1.27e-08	103.6	1980	8100	1800	900	1.5	3.97e-08	16.895	3.29
131-11-3	194.19	0.616	2014	573	3240	720	360	447	0.05939	6.694	1.66
131-17-9	246.26	0.155	43.27	484	3240	720	360	3.29	0.8802	8.032	3.36
131-27-1	303.31	2.14e-13	4494	1840	8100	1800	900	26.5	1.45e-14	15.93	-1.85
131-48-6	309.28	1.04e-14	1000000	414	1870	416	208	2.95	3.23e-18	17.753	-5.22
131-53-3	244.25	2.59e-05	52.73	1570	8100	1800	900	1.28	0.0001198	10.914	3.82
131-54-4	274.28	9.82e-07	30.53	1730	8100	1800	900	1.27	8.83e-06	12.22	3.9
131-55-5	246.22	4.59e-08	398.5	794	3240	720	360	1.28	2.83e-08	16.611	2.78
131-56-6	214.22	1.88e-05	413.4	785	3240	720	360	1.28	9.74e-06	11.925	2.96
131-57-7	228.25	0.000883	68.56	1220	8100	1800	900	1.28	0.002938	10.002	3.52
131-58-8	196.25	0.17	32	1110	8100	1800	900	39.2	1.038	7.748	3.69
131-79-3	261.33	2.59e-05	0.2176	4110	13000	2880	1440	5.1	0.03122	12.96	5.32
131-99-7	348.21	2.74e-09	5921	640	3240	720	360	0.994	1.62e-10	28.417	-1.5
132-27-4	192.19	2.55e-09	15000	592	3240	720	360	13.7	3.26e-11	6.093	0.59
132-64-9	168.2	0.133	1.475	470	3240	720	360	65.8	15.16	6.18	3.71
132-65-0	184.26	0.00912	0.7405	490	3240	720	360	31.7	2.269	7.24	4.17
133-06-2	300.59	3.41e-06	49.49	1680	13000	2880	1440	0.936	2.073e-05	9.343	2.74
133-07-3	296.56	1.85e-06	47.35	1140	13000	2880	1440	16.3	1.161e-05	8.354	2.84
133-14-2	380.01	0.000141	0.02993	4870	38900	8640	4320	146	1.794	10.369	6.01
133-18-6	241.29	0.000427	4.073	1850	8100	1800	900	6.02	0.02527	11.731	4.46
133-37-9	150.09	1.29e-05	1000000	123	503	112	55.9	18.5	1.94e-09	7.268	-1
133-49-3	282.4	0.000676	0.1398	4690	38900	8640	4320	1840	1.365	8.23	5.91
133-53-9	191.06	0.146	86.84	1110	8100	1800	900	13	0.3227	8.714	3.9
134-03-2	198.11	3.11e-16	1000000	274	1870	416	208	3.87	6.15e-20	1.727	-7.05
134-09-8	275.39	0.0005	0.07403	1200	8100	1800	900	2.2	1.86	11.828	6.28
134-20-3	151.17	2.63	1860	410	3240	720	360	7.38	0.2135	5.992	2.26
134-28-1	264.41	0.0302	0.0908	890	8100	1800	900	0.206	87.74	7.294	6.25
134-32-7	143.19	0.15	972.7	1100	8100	1800	900	1.28	0.02198	7.593	2.25
134-47-4	504.49	1.72e-24	0.05873	3440	8100	1800	900	1.35	1.48e-20	31.241	0.25
134-62-3	191.28	0.442	666	1350	8100	1800	900	10.1	0.1267	8.25	2.26
134-84-9	196.25	0.0597	32	1110	8100	1800	900	39.2	0.3663	7.748	3.69
134-96-3	182.18	0.00865	9526	587	3240	720	360	2.53	0.0001655	10.579	0.88
135-02-4	136.15	3.82	2951	340	3240	720	360	10.4	0.1759	6.209	1.79
135-19-3	144.17	0.0218	1512	519	3240	720	360	1.51	0.002085	8.651	2.69
135-37-5	221.12	2.19e-10	1000000	414	1870	416	208	2.98	4.84e-14	6.523	-8.27
135-51-3	348.25	1.22e-16	1000000	782	3240	720	360	72.8	4.23e-20	14.309	-4
135-58-0	244.37	0.000961	0.0174	1430	8100	1800	900	6.33	13.5	10.304	5.92
135-76-2	246.21	2.51e-13	1000000	638	3240	720	360	16.1	6.17e-17	9.719	-2.26
135-79-5	171.24	0.303	51.26	1130	8100	1800	900	8.62	1.011	7.861	3.6
135-88-6	219.29	0.000219	6.311	1340	8100	1800	900	0.741	0.007597	9.756	4.47
136-23-2	474.13	0.0531	0.01042	617	1870	416	208	1.38	2414	12.712	7.04
136-26-5	259.39	3.68e-07	497.3	648	3240	720	360	5.52	1.92e-07	12.199	1.9
136-45-8	251.28	0.073	20.8	1680	8100	1800	900	40.5	0.8826	11	2.12
136-60-7	178.23	3.57	29.52	285	1870	416	208	49.4	21.57	6.63	3.3
136-77-6	194.28	0.00157	201.3	775	3240	720	360	1.24	0.001518	11.415	4.04
136-99-2	268.45	1.26e-05	1.537	732	3240	720	360	2.51	0.002201	12.104	4.78
137-00-8	143.2	0.228	9081	701	3240	720	360	34.1	0.003595	9.142	1.11
137-03-1	182.31	2.38	20.63	421	3240	720	360	13.4	20.97	5.941	4
137-06-4	124.2	61.7	167.9	379	3240	720	360	18.3	45.66	4.858	3.23
137-16-6	293.39	2.93e-11	6490	525	3240	720	360	7.71	1.32e-12	8.622	0.37
137-17-7	135.21	3.09	1009	988	8100	1800	900	1.28	0.4145	6.264	2.72
137-20-2	425.61	7.59e-16	23.61	1160	8100	1800	900	1.16	1.37e-14	12.674	2.29
137-26-8	240.42	0.00145	9064	1040	8100	1800	900	0.709	3.855e-05	6.858	1.7
137-30-4	305.81	1.04e-05	10300	1720	8100	1800	900	1.87	3.08e-07	8.827	1.14
137-32-6	88.15	606	32200	346	3240	720	360	29.9	1.657	4.529	1.26
137-40-6	96.06	4.8e-05	1000000	310	1870	416	208	562	4.61e-09	1.295	-3.23
137-41-7	107.19	130	440400	308	3240	720	360	2.65	0.03161	2.62	0.48
137-66-6	414.54	2.59e-13	0.06038	298	1870	416	208	3.1	1.78e-09	11.242	6
138-22-7	146.19	22.7	52980	262	1870	416	208	36.8	0.06254	4.905	0.8
138-23-8	226.36	2.7	0.582	324	3240	720	360	3.47	1053	6.397	5.55
138-52-3	286.28	5.47e-11	162400	432	1870	416	208	2.8	9.64e-14	13.502	-1.41
138-59-0	174.15	6.67e-07	1000000	414	1870	416	208	1.97	1.16e-10	10.619	-1.34
138-86-3	136.24	193	4.581	123	3240	720	360	0.334	5749	4.265	4.83
138-87-4	154.25	4.16	287.6	825	8100	1800	900	3.3	2.231	6.671	3.41
138-93-2	118.17	1.41	2736	167	3240	720	360	7.9	0.06046	1.809	0.31
139-02-6	116.1	3.47e-06	1000000	513	3240	720	360	11.9	4.02e-10	3.218	-1.17
139-05-9	201.22	3.33e-09	1000000	496	3240	720	360	7.47	6.71e-13	3.525	-2.63
139-07-1	340	2.51e-09	22.47	1190	3240	720	360	6.3	3.79e-08	12.437	2.93
139-08-2	368.05	4.7e-10	2.203	3260	8100	1800	900	5.89	7.86e-08	13.171	3.91
139-33-3	336.21	1.01e-14	1000000	461	1870	416	208	1.49	3.39e-18	9.617	-11.7
139-41-3	185.16	3.33e-12	1000000	363	1870	416	208	2.61	6.17e-16	6.221	-6.06
139-44-6	939.51	1.52e-27	1.21e-17	493	3240	720	360	2.57	10370000	28.28	19.73
139-45-7	260.29	0.481	560.2	769	3240	720	360	26.4	0.2236	8.616	1.84
139-65-1	216.3	0.00146	495.1	1860	8100	1800	900	1.94	0.0006407	11.975	2.46
139-70-8	274.41	0.0101	0.07646	1100	8100	1800	900	0.512	36.32	8.384	6.27
139-85-5	138.12	0.00312	38010	670	3240	720	360	8.91	1.134e-05	12.317	0.75
139-89-9	344.21	1.39e-13	1000000	414	1870	416	208	1.46	4.77e-17	10.442	-11.36
139-96-8	414.58	1.32e-19	844.5	639	3240	720	360	4.32	6.5e-20	18.96	0.55
140-01-2	503.26	3.8e-13	1000000	470	1870	416	208	1.01	1.91e-16	12.074	-16.25
140-03-4	354.53	0.00374	0.002368	486	3240	720	360	1.29	558.9	10.334	7.48
140-04-5	396.62	0.000397	7.219e-05	472	3240	720	360	1.26	2183	11.446	8.96
140-07-8	236.31	6.86e-08	1000000	640	3240	720	360	1.21	1.62e-11	10.511	-3.75
140-10-3	148.16	0.0215	2911	375	1870	416	208	8.05	0.001092	8.285	2.07
140-11-4	150.18	25	1605	446	3240	720	360	40.2	2.333	5.295	2.08
140-25-0	290.45	0.00839	0.01491	542	3240	720	360	13.3	163.4	8.996	6.99
140-26-1	206.29	0.907	16.47	469	3240	720	360	23.5	11.36	6.715	3.97
140-27-2	218.3	0.28	8.282	463	3240	720	360	2.03	7.38	7.256	4.25
140-31-8	129.21	8.84	1000000	1430	8100	1800	900	1.2	0.001142	9	-1.57
140-39-6	150.18	25.6	1195	410	3240	720	360	65.5	3.217	4.644	2.14
140-66-9	206.33	0.0691	4.821	1150	8100	1800	900	6.06	2.956	9.015	5.28
140-67-0	148.21	22	84.55	708	8100	1800	900	3.92	38.56	5.194	3.47
140-88-5	100.12	5120	8717	179	3240	720	360	12	58.8	3.178	1.22
140-95-4	120.11	0.000285	1000000	391	1870	416	208	8.82	3.43e-08	7.267	-3.15
141-02-6	340.51	0.26	0.001167	286	1870	416	208	8.69	75860	11.464	7.94
141-03-7	230.31	0.961	41.65	303	1870	416	208	26.1	5.315	7.257	3.35
141-04-8	258.36	0.75	5.649	471	3240	720	360	20.3	34.33	7.85	4.19
141-05-9	172.18	23.7	800.8	568	3240	720	360	23.2	5.102	7.201	2.2
141-06-0	144.22	235	308.7	172	1870	416	208	24.2	109.6	4.381	2.83
141-08-2	372.55	1.38e-10	0.3178	289	1870	416	208	1.16	1.63e-07	12.155	4.86
141-09-3	184.28	24.4	16.8	249	3240	720	360	3.51	267.6	5.047	4.09
141-10-6	192.3	2.56	7.854	453	3240	720	360	0.168	62.67	6.278	4.43
141-11-7	198.31	10.1	4.872	326	3240	720	360	3.51	411.3	5.732	4.64
141-12-8	196.29	6.17	18.24	380	3240	720	360	0.262	66.43	4.985	4.48
141-13-9	210.36	1.47	0.9069	283	3240	720	360	0.489	343.3	6.484	5.42
141-14-0	212.34	2.74	1.832	362	3240	720	360	0.516	316.8	5.947	5.05
141-15-1	226.36	1.55	0.5036	359	3240	720	360	3.43	701.1	6.467	5.62
141-16-2	226.36	1.1	0.5878	373	3240	720	360	0.514	424.1	6.315	5.54
141-17-3	434.58	0.000107	3.212	757	3240	720	360	3.47	0.01447	14.134	3.24
141-18-4	346.47	0.00477	3.812	460	1870	416	208	5.59	0.4338	11.058	3.78
141-20-8	288.43	0.000189	16.58	758	3240	720	360	7.78	0.003293	11.076	4.04
141-21-9	370.62	5.16e-11	0.06629	809	3240	720	360	2.07	2.89e-07	17.536	5.67
141-22-0	298.47	0.598	0.5198	450	1870	416	208	1.25	343.7	13.364	6.19
141-23-1	314.51	1.12e-05	0.0629	528	3240	720	360	8.37	0.05593	11.302	6.69
141-24-2	312.5	9.13e-06	0.09867	484	3240	720	360	1.25	0.02892	11.148	6.48
141-25-3	156.27	2.71	181.5	399	3240	720	360	3.4	2.342	6.336	3.63
141-27-5	152.24	12.2	84.71	374	3240	720	360	0.468	21.88	5.263	3.45
141-28-6	202.25	4.74	403.8	420	3240	720	360	37.4	2.371	6.199	2.37
141-32-2	128.17	674	902.1	148	1870	416	208	16.7	95.66	3.931	2.2
141-43-5	61.08	54.5	1000000	588	3240	720	360	7.16	0.003331	6.513	-1.61
141-53-7	68.01	1e-05	1000000	340	1870	416	208	100000	6.83e-10	0.242	-4.27
141-57-1	177.53	1790	158.4	142	3240	720	360	99.5	2002	3.405	2.99
141-62-8	310.69	64.8	0.002918	237	8100	1800	900	172	6899000	5.368	8.16
141-78-6	88.11	13100	29930	264	3240	720	360	160	38.58	2.991	0.86
141-79-7	98.15	1640	8035	324	3240	720	360	0.969	20.03	4.194	1.37
141-82-2	104.06	0.134	1000000	401	1870	416	208	164	1.401e-05	7.149	-1.25
141-86-6	109.13	0.0632	66370	1230	8100	1800	900	1.28	0.0001039	10.693	0.25
141-92-4	218.34	0.221	829.5	988	8100	1800	900	11	0.05825	8.514	2.5
141-94-6	339.61	0.00205	2.344	1930	8100	1800	900	0.871	0.2975	11.265	5.26
141-97-9	130.14	124	56170	394	3240	720	360	130	0.287	4.559	-0.2
142-08-5	95.1	0.0422	14600	740	3240	720	360	39.7	0.0002753	8.593	1.07
142-09-6	170.25	39.6	39.97	166	1870	416	208	7.1	168.7	5.342	3.73
142-15-4	412.56	1.71e-14	5.268	497	3240	720	360	1.29	1.34e-12	10.024	3.15
142-16-5	340.51	0.26	0.001167	286	1870	416	208	8.69	75860	11.464	7.94
142-18-7	274.4	5.11e-06	12.67	361	1870	416	208	8.74	0.0001106	10.212	3.67
142-19-8	170.25	30.2	44.64	197	1870	416	208	5.72	115.4	5.081	3.67
142-26-7	103.12	0.0705	1000000	587	3240	720	360	17.7	7.27e-06	8.643	-1.67
142-31-4	232.27	3.36e-09	50570	604	3240	720	360	27.9	1.54e-11	5.345	-0.27
142-47-2	169.11	4.93e-12	1000000	416	1870	416	208	6.43	8.34e-16	5.158	-7.06
142-48-3	355.57	2.89e-07	0.005507	714	3240	720	360	5.84	0.01868	14.566	7.05
142-50-7	222.37	0.0789	1.532	929	8100	1800	900	0.253	11.46	7.811	5.68
142-54-1	257.42	8.39e-07	16.15	770	3240	720	360	7.25	1.337e-05	12.619	3.66
142-55-2	258.4	0.00059	6.301	525	3240	720	360	10.9	0.02417	9.835	4.73
142-58-5	271.45	1.43e-07	4.435	764	3240	720	360	7.61	8.73e-06	13.056	4.22
142-60-9	186.3	11.6	10.87	275	3240	720	360	24	198.1	5.461	4.3
142-62-1	116.16	37.1	5898	275	1870	416	208	46.5	0.73	6.429	2.05
142-75-6	342.57	1.5e-06	0.006205	544	3240	720	360	8.04	0.08244	12.037	7.67
142-77-8	338.58	0.00224	5.717e-05	462	3240	720	360	1.28	13260	9.352	9.49
142-78-9	243.39	8.76e-07	43.9	764	3240	720	360	8.3	4.86e-06	12.321	3.24
142-82-5	100.21	6120	3.554	77	1870	416	208	35.9	172500	2.747	3.78
142-83-6	96.13	172	8135	232	1870	416	208	3.51	2.032	4.768	1.37
142-87-0	260.33	3.4e-10	5133	599	3240	720	360	21.4	1.72e-11	6.077	0.71
142-90-5	254.42	0.189	0.05478	343	3240	720	360	5.75	879.3	7.444	6.68
142-91-6	298.51	0.0274	0.001354	410	3240	720	360	11.6	6026	8.336	8.16
142-92-7	144.22	194	308.7	187	1870	416	208	34.5	90.31	4.494	2.83
142-96-1	130.23	1030	166.5	91.4	1870	416	208	8.91	801.9	3.82	3.01
143-07-7	200.32	0.188	12.76	282	1870	416	208	18.3	2.951	8.02	5
143-08-8	144.26	4.38	156.8	264	1870	416	208	18.4	4.023	6.67	3.3
143-13-5	186.3	29.1	10.87	270	3240	720	360	22	498.1	5.461	4.3
143-14-6	168.28	6.05	22.27	316	3240	720	360	1.22	45.74	5.545	4.04
143-19-1	304.45	1.68e-10	5.209	498	3240	720	360	1.31	9.82e-09	6.655	3.92
143-22-6	206.28	0.0691	126900	640	3240	720	360	4.98	0.0001123	9.036	0.02
143-23-7	215.39	0.0631	10840	797	3240	720	360	1.61	0.001256	11.713	1.8
143-24-8	222.28	1.2	254000	1150	8100	1800	900	4.45	0.001047	7.657	-1.03
143-27-1	241.46	0.0494	0.4823	510	3240	720	360	5	24.76	8.393	6.73
143-28-2	268.49	0.00199	0.02367	455	3240	720	360	1.28	22.53	9.222	7.5
143-74-8	354.38	8.29e-11	58.41	3050	8100	1800	900	3.16	5.03e-10	18.09	3.21
144-15-0	570.81	1.45e-08	7.8e-07	898	3240	720	360	7.67	10.53	16.295	9.96
144-19-4	146.23	0.469	6879	471	3240	720	360	14.6	0.009976	6.969	1.49
144-39-8	210.32	4.25	2.643	472	8100	1800	900	0.494	338.4	5.905	4.88
144-55-8	84.01	4.97e-07	1000000	565	3240	720	360	494	4.18e-11	2.595	-4.01
144-62-7	90.04	0.746	1000000	395	1870	416	208	247	6.722e-05	6.493	-1.74
144-79-6	232.79	0.178	0.8846	1140	8100	1800	900	63.4	46.66	7.293	5.29
147-24-0	291.82	1.59e-08	602.4	1980	8100	1800	900	4.21	7.69e-09	15.611	1.59
147-47-7	173.26	2.05	89.71	1040	8100	1800	900	1.01	3.965	7.2	3.3
147-71-7	150.09	1.29e-05	1000000	123	503	112	55.9	18.5	1.94e-09	7.268	-1
147-85-3	115.13	6.24e-06	131300	374	1870	416	208	3.1	5.47e-09	4.565	-2.15
147-93-3	154.18	0.00762	661.5	682	3240	720	360	54.5	0.001774	8.757	2.22
148-03-8	416.69	3.71e-06	1.07e-06	1650	13000	2880	1440	1.11	1445	15.511	11.63
148-24-3	145.16	0.004	7965	469	3240	720	360	1.29	7.289e-05	6.483	1.66
148-25-4	320.29	1.96e-14	1000000	785	3240	720	360	21.1	6.28e-18	20.395	-1.9
148-75-4	304.29	4.22e-13	714200	782	3240	720	360	67.4	1.8e-16	16.893	-1.42
148-79-8	201.25	8.3e-08	335.2	777	3240	720	360	3.95	4.99e-08	11.532	2
149-30-4	167.24	0.00561	543.4	584	3240	720	360	6.32	0.001727	8.249	2.86
149-39-3	427.62	9.95e-16	15.03	1270	8100	1800	900	5.53	2.83e-14	12.832	2.5
149-44-0	118.08	9.41e-10	1000000	587	3240	720	360	10	1.11e-13	6.654	-6.17
149-57-5	144.22	8.35	1111	271	1870	416	208	31.4	1.083	6.574	2.96
149-74-6	191.13	34.7	25.46	390	3240	720	360	122	260.2	5.172	3.84
149-91-7	170.12	1.07e-06	58950	704	3240	720	360	2.38	3.09e-09	18.002	0.86
150-19-6	124.14	2.15	26410	464	3240	720	360	1.28	0.01009	6.965	1.59
150-30-1	165.19	3.49e-05	9357	720	3240	720	360	5.81	6.17e-07	6.869	-1.28
150-38-9	358.19	1.04e-14	1000000	461	1870	416	208	1.52	3.73e-18	8.167	-13.15
150-39-0	278.26	2.98e-11	431000	414	1870	416	208	1.36	1.92e-14	17.718	-4.09
150-60-7	246.39	0.00363	0.7537	1490	8100	1800	900	1.03	1.185	8.78	5.29
150-68-5	198.65	0.00126	979.8	1520	8100	1800	900	17.6	0.000256	9.571	2.03
150-75-4	123.16	0.41	20580	739	3240	720	360	4.58	0.002449	8.54	0.79
150-76-5	124.14	1.11	16480	459	3240	720	360	8.62	0.008336	7.447	1.59
150-78-7	138.17	11.4	1543	112	3240	720	360	12.7	1.02	5.152	2.15
150-84-5	198.31	7.01	5.686	347	3240	720	360	0.516	244.6	5.581	4.56
150-86-7	296.54	0.00043	0.00327	1050	8100	1800	900	0.5	38.93	9.724	8.32
150-90-3	162.05	1.16e-05	1000000	409	1870	416	208	360	1.88e-09	6.842	-2.81
151-05-3	192.26	2.97	54.93	1030	8100	1800	900	40.3	10.41	6.309	3.44
151-10-0	138.17	19.9	1105	102	3240	720	360	1.27	2.484	5.322	2.15
151-19-9	158.29	8.61	188.9	725	8100	1800	900	17.6	7.217	6.25	3.6
151-21-3	288.38	2.4e-10	616.8	595	3240	720	360	17.3	1.12e-10	6.724	1.69
153-18-4	610.53	8.28e-25	27560	781	3240	720	360	0.279	1.83e-26	34.867	-2.02
154-87-0	425.32	2.74e-09	2613	2860	13000	2880	1440	8.68	4.47e-10	26.461	-0.1
155-04-4	397.86	1.54e-09	0.01275	3780	8100	1800	900	2.84	4.826e-05	20.229	5.02
156-06-9	164.16	0.033	65220	640	3240	720	360	42.3	8.289e-05	8.603	0.46
156-43-4	137.18	2.93	7510	870	8100	1800	900	2.58	0.05358	6.452	1.65
156-57-0	113.61	0.009	1000000	713	3240	720	360	4.92	1.02e-06	9.729	-2.14
156-59-2	96.94	33800	2338	157	8100	1800	900	98.7	1404	2.778	1.98
208-96-8	152.2	0.167	2.487	447	3240	720	360	0.744	10.2	6.272	3.94
261-31-4	198.28	0.00265	1.751	1200	8100	1800	900	8.13	0.3004	7.145	4.55
271-89-6	118.14	172	534.8	388	3240	720	360	6.88	37.99	4.338	2.54
275-51-4	128.18	11.4	50.22	130	3240	720	360	0.944	29.2	2.994	3.38
280-57-9	112.18	6.62	1000000	1300	8100	1800	900	11.7	0.0007418	6.229	-0.49
286-99-7	182.31	14.8	5.198	354	3240	720	360	5.24	519	5.907	4.66
288-32-4	68.08	0.578	159100	390	3240	720	360	7.15	0.0002476	3.733	0.06
288-47-1	85.12	2280	53780	468	3240	720	360	182	3.608	4.245	0.99
289-16-7	124.23	107	6721	427	3240	720	360	0.857	1.971	5.115	1.36
290-37-9	80.09	1290	218100	461	3240	720	360	1120	0.4729	3.663	-0.06
292-46-6	188.35	0.245	532.7	445	3240	720	360	0.325	0.08674	5.69	2.31
293-96-9	140.27	62.7	0.9891	86.4	3240	720	360	18.2	8886	3.63	5.14
298-00-0	263.21	0.0155	29.36	1140	8100	1800	900	4.35	0.1386	8.248	2.75
298-02-2	260.37	0.094	18.87	454	3240	720	360	1.03	1.297	7.308	3.62
298-07-7	322.43	2.4e-05	0.05926	581	3240	720	360	3.93	0.1306	11.845	6.07
298-12-4	74.04	25	1000000	383	1870	416	208	19.5	0.001856	5.514	-1.4
301-00-8	292.47	0.00413	0.05771	503	3240	720	360	0.471	20.95	6.633	7.59
301-02-0	281.49	2.08e-05	0.04591	574	3240	720	360	1.27	0.1275	10.907	6.48
301-10-0	405.13	1.67e-06	20.1	461	3240	720	360	20.2	3.359e-05	3.883	2.52
302-72-7	89.09	3.57e-06	359000	382	1870	416	208	7.29	8.87e-10	4.255	-2.99
302-84-1	105.09	3.96e-06	402000	391	1870	416	208	6.06	1.04e-09	8.581	-3.46
302-95-4	414.57	1.12e-18	215.2	1190	8100	1800	900	4.96	2.15e-18	10.476	1.24
303-43-5	651.12	2.62e-12	1.05e-13	1650	13000	2880	1440	0.661	16200	15.829	17.39
303-98-0	659.01	3.41e-14	5.23e-13	4450	38900	8640	4320	0.0717	42.97	19.489	16.51
304-17-6	189.22	0.000104	427.3	497	3240	720	360	10.7	4.605e-05	8.211	2.42
305-01-1	178.15	7.96e-07	72130	764	3240	720	360	4.81	1.97e-09	12.062	0.55
305-84-0	226.24	3.51e-10	55030	640	3240	720	360	1.61	1.44e-12	16.008	-1.81
306-52-5	229.38	0.000283	3305	1620	13000	2880	1440	160	1.971e-05	12.369	1.13
306-91-2	624.12	42.7	8.7e-06	6640	38900	8640	4320	100000	3069000000	-1.332	7.45
306-94-5	462.08	973	0.003208	6040	38900	8640	4320	100000	140200000	-1.172	5.68
321-14-2	172.57	0.000802	522.2	678	3240	720	360	60.2	0.0002648	9.457	2.89
326-61-4	194.19	0.226	692.8	379	3240	720	360	5.14	0.06316	8.311	2.14
327-62-8	74.08	806	173600	298	1870	416	208	210	0.3436	5.07	0.58
327-97-9	354.32	2.99e-14	404700	640	3240	720	360	2.97	2.63e-17	19.278	-1.01
328-50-7	146.1	0.00957	1000000	414	1870	416	208	55.4	1.4e-06	9.976	-2.08
330-54-1	233.1	0.00062	150.6	1610	8100	1800	900	23.6	0.0009596	10.366	2.67
331-39-5	180.16	3.92e-06	54070	452	1870	416	208	4.94	1.31e-08	15.392	1.11
334-48-5	172.27	1.17	47.89	286	1870	416	208	23	4.211	8.351	4.02
334-50-9	254.63	2.72e-15	139600	1830	8100	1800	900	5.46	4.96e-18	18.78	-0.93
335-27-3	400.06	5640	0.004028	3650	38900	8640	4320	100000	560100000	-0.344	6.02
335-57-9	388.05	11700	0.0132	2710	38900	8640	4320	100000	342600000	-1.097	5.5
350-03-8	121.14	17.5	42670	1270	8100	1800	900	584	0.04958	6.49	0.49
352-87-4	168.12	4780	2921	231	8100	1800	900	8.9	274.7	2.769	2.18
352-93-2	90.18	7000	2687	157	3240	720	360	17.1	234.9	3.113	1.9
353-09-3	131.14	0.0398	1000000	398	1870	416	208	2.67	5.21e-06	12.263	-1.42
355-02-2	350.06	14900	0.1101	1520	38900	8640	4320	100000	47480000	-0.955	4.69
355-42-0	338.04	31900	0.09908	986	38900	8640	4320	100000	108700000	-1.046	4.83
355-93-1	300.15	2860	5.972	444	13000	2880	1440	8.92	144100	3.227	3.88
359-11-5	82.03	1000000	13260	128	3240	720	360	274	626.8	-0.088	1.16
364-76-1	156.12	0.266	2662	2180	13000	2880	1440	80.9	0.01556	8.115	1.67
367-51-1	114.09	5.92e-06	1000000	308	1870	416	208	7.38	6.75e-10	2.318	-3.78
368-47-8	162.19	4680	355.2	188	3240	720	360	132	2137	2.73	2.66
369-77-7	349.14	3.6e-06	0.2183	8270	38900	8640	4320	17.9	0.005757	12.884	5.22
372-75-8	175.19	5.97e-06	12830	640	3240	720	360	5.38	8.16e-08	11.742	-3.93
404-86-4	305.42	1.76e-06	4.409	1980	8100	1800	900	1.09	0.0001219	15.371	4
406-58-6	148.08	59100	26.1	174	13000	2880	1440	29500	335100	0.858	3.2
408-35-5	278.41	1.84e-10	33.32	347	1870	416	208	13.8	1.54e-09	6.076	3.15
409-02-9	126.2	497	1208	351	3240	720	360	4.3	51.81	4.627	2.22
409-21-2	46.14	1320000	16020	142	3240	720	360	1720	291.8	0.541	1.08
420-04-2	42.04	1870	651500	613	3240	720	360	100000	0.1204	7.155	-0.81
420-12-2	60.11	32100	28080	319	3240	720	360	125	68.5	2.659	0.81
423-55-2	498.97	1020	0.0003212	4920	38900	8640	4320	100000	1578000000	0.189	6.57
429-67-4	624.72	0.999	8.05e-09	804	38900	8640	4320	42.9	77530000000	7.258	12.38
431-03-8	86.09	9360	1000000	359	3240	720	360	1080	0.8057	1.925	-1.34
431-89-0	170.03	410000	79.5	175	13000	2880	1440	158000	216700	-0.306	2.51
432-24-6	152.24	29.4	111.2	341	8100	1800	900	0.5	40.34	5.221	3.31
432-25-7	152.24	24.1	86.14	423	8100	1800	900	3.68	42.65	5.552	3.44
434-16-2	384.65	1.07e-07	0.0005022	2430	13000	2880	1440	0.108	0.0822	10.889	8.65
443-79-8	131.18	1.07e-06	22790	377	1870	416	208	6.03	6.16e-09	5.126	-1.59
444-27-9	133.17	0.000138	300800	331	1870	416	208	2.05	6.08e-08	3.614	-3.04
445-03-4	195.57	13	235.4	1550	13000	2880	1440	40.6	10.79	5.979	2.68
446-72-0	270.24	6.91e-10	257.7	1870	8100	1800	900	0.781	7.24e-10	17.519	2.84
458-35-5	180.21	0.00118	17210	726	3240	720	360	1.69	1.234e-05	11.589	1.19
458-36-6	178.19	0.0139	5711	695	3240	720	360	3.91	0.0004326	10.555	1.16
458-37-7	368.39	4.1e-10	7.475	1880	8100	1800	900	1.44	2.02e-08	22.831	3.29
459-80-3	168.24	2.06	108.2	430	3240	720	360	0.434	3.192	7.606	3.7
460-73-1	134.05	59100	291.5	173	8100	1800	900	35300	27160	-0.179	2.04
461-58-5	84.08	0.218	1000000	633	3240	720	360	6.11	1.838e-05	6.886	-1.26
462-18-0	198.35	2.84	4.53	239	1870	416	208	13.5	124.3	6.143	4.68
462-95-3	104.15	9360	21780	272	3240	720	360	15.3	44.75	3.404	0.79
463-40-1	278.44	0.00166	0.1236	491	3240	720	360	0.47	3.754	9.308	7.3
464-07-3	102.18	913	20300	344	3240	720	360	28	4.59	4.623	1.64
464-41-5	172.7	2.57	7.464	268	13000	2880	1440	53.8	59.54	4.649	4.57
464-45-9	154.25	0.0572	1186	833	8100	1800	900	22.5	0.007439	5.939	2.85
464-48-2	152.24	1.42	339.1	744	8100	1800	900	26	0.6405	5.22	3.04
464-49-3	152.24	1.42	339.1	744	8100	1800	900	26	0.6405	5.22	3.04
464-92-6	488.71	1.55e-15	0.05987	2470	13000	2880	1440	1.23	1.27e-11	15.598	5.32
465-30-5	172.7	182	7.464	262	13000	2880	1440	46.3	4226	4.649	4.57
469-61-4	204.36	0.0184	0.1504	305	8100	1800	900	2.76	25	4.838	5.74
470-40-6	204.36	9.37	0.07152	336	13000	2880	1440	0.519	26780	5.218	6.12
470-67-7	154.25	238	211.3	714	8100	1800	900	14.3	173.2	5.049	3.13
470-82-6	154.25	208	332.1	802	8100	1800	900	23.1	96.6	5.087	3.13
470-99-5	140.23	6.22	1014	399	3240	720	360	0.514	0.8592	6.153	2.84
471-53-4	470.7	3.88e-13	0.01138	5720	38900	8640	4320	2.1	1.61e-08	17.994	6.9
472-15-1	456.72	3.88e-11	0.001607	6570	38900	8640	4320	2.5	1.103e-05	15.476	8
472-61-7	596.86	1e-17	7.9e-10	4480	38900	8640	4320	0.277	7.57e-06	15.629	13.27
472-64-0	166.27	11.1	36.54	377	8100	1800	900	0.492	50.54	5.589	3.8
472-66-2	166.27	7.65	28.31	348	8100	1800	900	0.439	44.95	5.647	3.93
472-97-9	222.37	0.0135	18.93	1620	13000	2880	1440	13.1	0.1582	7.702	4.4
473-03-0	428.75	9.79e-09	6.9e-07	4510	38900	8640	4320	0.436	6.093	13.176	11.68
473-54-1	154.25	9.37	863.1	886	8100	1800	900	22.7	1.675	6.412	2.85
473-55-2	138.26	292	4.731	108	8100	1800	900	19.2	8533	3.196	4.35
473-67-6	152.24	1.06	480.4	424	3240	720	360	0.514	0.3346	6.706	2.73
473-98-3	442.73	4.12e-11	0.0001726	6420	38900	8640	4320	2.42	0.0001057	11.841	8.18
475-03-6	174.29	4.28	1.505	854	8100	1800	900	13.1	495.6	5.772	5.38
475-20-7	204.36	2.5	0.2525	260	8100	1800	900	4.46	2018	4.402	5.48
475-71-8	408.42	1.1e-13	0.001598	14800	38900	8640	4320	13.1	2.81e-08	23.153	6
476-32-4	353.38	4.82e-09	196.4	3010	13000	2880	1440	1.12	8.68e-09	18.73	2.91
479-18-5	254.25	3.46e-11	19300	640	3240	720	360	7.33	4.55e-13	13.003	-1.46
479-66-3	308.25	5.1e-11	139300	1150	8100	1800	900	0.562	1.13e-13	20.235	-0.02
480-16-0	302.24	5.45e-13	2192	771	3240	720	360	0.761	7.52e-14	20.109	1.48
480-18-2	304.26	1.79e-11	22030	771	3240	720	360	1.01	2.47e-13	20.661	0.59
480-40-0	254.24	1.1e-08	84	1820	8100	1800	900	0.781	3.35e-08	14.216	3.32
480-41-1	272.26	3.82e-09	475.2	1870	8100	1800	900	1.04	2.19e-09	17.442	2.61
481-53-8	372.38	1.74e-07	8.701	3980	13000	2880	1440	0.772	7.48e-06	15.15	3.18
482-54-2	346.34	3.02e-12	3821	458	1870	416	208	1.16	2.73e-13	19.034	-2.15
482-89-3	262.27	3.13e-09	13.44	1580	8100	1800	900	3.05	6.11e-08	15.409	3.11
483-63-6	203.29	0.0651	195.3	1100	8100	1800	900	5.76	0.06786	7.934	2.73
484-12-8	244.29	0.00092	10.84	1050	8100	1800	900	0.47	0.02073	8.174	3.95
485-47-2	178.15	1.38e-06	15060	1150	8100	1800	900	249	1.62e-08	9.53	0.32
485-72-3	268.27	2.27e-07	157.3	1830	8100	1800	900	0.779	3.89e-07	14.152	3.11
486-25-9	180.21	0.00762	3.737	516	3240	720	360	41.6	0.3678	8.138	3.55
486-35-1	178.15	1.19e-06	72130	764	3240	720	360	4.81	2.93e-09	12.062	0.55
488-10-8	164.25	2.83	60.54	440	3240	720	360	0.352	7.668	5.856	3.55
488-43-7	181.19	2.22e-06	1000000	414	1870	416	208	3.31	4.03e-10	9.469	-3.61
489-40-7	204.36	2.72	0.06382	294	8100	1800	900	0.207	8709	5.207	6.18
489-84-9	198.31	1.42	0.1115	200	3240	720	360	0.568	2513	4.892	5.93
489-86-1	222.37	0.00483	3.61	1010	8100	1800	900	0.205	0.2981	8.098	5.24
490-03-9	168.24	0.00727	139.7	255	3240	720	360	1.4	0.00875	5.461	3.11
490-78-8	152.15	0.00877	15070	740	3240	720	360	12.1	8.857e-05	9.751	1.49
490-79-9	154.12	4.36e-05	9034	690	3240	720	360	27.6	7.44e-07	11.958	1.76
491-04-3	154.25	2.09	360.2	419	3240	720	360	0.508	0.8907	6.49	3.3
491-07-6	154.25	49.4	180.5	385	3240	720	360	9.75	42.16	5.237	2.87
491-09-8	150.22	13.5	164.7	406	3240	720	360	0.436	12.28	5.75	3.12
491-35-0	143.19	1.9	479.2	477	3240	720	360	8.44	0.5697	7.118	2.69
491-70-3	286.24	2.93e-11	387.5	1890	8100	1800	900	0.78	2.16e-11	21.192	2.36
492-37-5	150.18	0.939	4987	605	3240	720	360	37.9	0.02826	7.47	1.85
494-90-6	150.22	10.7	16.36	441	8100	1800	900	1.57	98.55	4.806	4.29
494-99-5	152.19	17.5	1010	142	8100	1800	900	5.1	2.632	5.26	2.19
495-40-9	148.21	11.3	332.9	448	3240	720	360	39.8	5.016	5.92	2.66
495-61-4	204.36	2.93	0.009945	194	8100	1800	900	0.245	60270	5.296	7.12
495-62-5	204.36	1.91	0.008994	449	8100	1800	900	0.116	43320	5.212	7.18
495-69-2	179.18	3.8e-05	30210	640	3240	720	360	24	2.25e-07	10.841	0.46
495-76-1	152.15	0.0384	30470	379	3240	720	360	4.95	0.0001917	9.035	1.14
496-77-5	144.22	2.79	11190	330	3240	720	360	15.2	0.03591	4.485	1.6
497-03-0	84.12	2380	13420	220	3240	720	360	4.45	14.96	3.594	1.15
497-19-8	105.99	1.32e-14	1000000	537	3240	720	360	100000	1.4e-18	0.413	-6.19
497-23-4	84.08	131	417800	353	3240	720	360	20.6	0.02632	2.106	-0.52
497-30-3	231.31	3.85e-11	1000000	648	3240	720	360	3.65	8.91e-15	17.897	-2.04
497-76-7	272.26	3.07e-10	959100	642	3240	720	360	2.82	8.71e-14	15.959	-0.98
498-00-0	154.17	0.00358	103000	668	3240	720	360	6.24	5.37e-06	10.681	0.42
498-02-2	166.18	0.0134	8653	702	3240	720	360	9.39	0.000256	9.627	1.02
498-16-8	154.25	2.61	253.2	392	3240	720	360	0.459	1.584	6.17	3.48
498-36-2	132.16	0.289	165500	268	1870	416	208	23.2	0.000231	5.715	0.75
498-40-8	169.15	1.2e-09	1000000	391	1870	416	208	6.51	2.03e-13	7.782	-6.2
498-66-8	94.16	4260	60.32	75.9	3240	720	360	0.125	6639	3.04	2.85
498-81-7	156.27	6.1	278	828	8100	1800	900	12.2	3.425	6.627	3.42
499-12-7	174.11	0.000111	193800	128	503	112	55.9	10.9	1e-07	15.05	-0.14
499-44-5	164.21	0.0052	1592	331	3240	720	360	1.89	0.0005363	4.804	1.83
499-54-7	170.25	1.21	525.8	336	3240	720	360	18.7	0.392	4.059	2.42
499-69-4	156.27	3.38	298.3	417	3240	720	360	10.7	1.767	6.587	3.38
499-70-7	154.25	37	257.3	386	3240	720	360	11	22.22	5.057	2.87
499-75-2	150.22	3.09	301.1	466	3240	720	360	2.58	1.543	7.799	3.52
499-83-2	167.12	4.46e-05	20790	707	3240	720	360	235	3.59e-07	13.502	0.57
499-89-8	164.21	0.15	298.8	432	3240	720	360	2.24	0.08279	7.768	3.2
500-02-7	138.21	63.8	593.4	390	3240	720	360	3.55	14.84	5.169	2.53
500-22-1	107.11	75.8	62860	423	3240	720	360	15	0.129	5.502	0.52
500-38-9	302.37	1.64e-08	4.969	3410	8100	1800	900	2.09	9.98e-07	21.663	4.64
501-30-4	142.11	0.000102	934600	389	3240	720	360	3.35	1.56e-08	4.37	-1.25
501-36-0	228.25	1.65e-07	275	890	3240	720	360	0.686	1.37e-07	17.325	3.08
501-52-0	150.18	0.119	5046	695	3240	720	360	34.8	0.003531	7.46	2.29
501-92-8	134.18	3.04	1110	467	3240	720	360	3.24	0.3675	7.389	2.91
501-94-0	138.17	0.0183	123800	719	3240	720	360	5.58	2.039e-05	10.001	1.09
502-44-3	114.15	22.6	27860	363	3240	720	360	39.9	0.09232	2.811	0.68
502-47-6	170.25	5.46	89.48	427	3240	720	360	0.518	10.4	7.429	3.78
502-61-4	204.36	3.33	0.01053	425	8100	1800	900	0.199	64690	5.067	7.1
502-65-8	536.89	2.28e-09	1.04e-13	1620	13000	2880	1440	0.134	11800000	13.401	17.64
502-69-2	268.49	0.241	0.02335	765	8100	1800	900	10.6	2775	7.758	6.91
502-72-7	224.39	0.0557	0.5989	971	8100	1800	900	10.3	20.88	7.122	5.55
502-99-8	136.24	320	6.923	94.9	3240	720	360	0.186	6297	3.75	4.88
503-74-2	102.13	152	29240	271	1870	416	208	62.6	0.5309	5.628	1.49
504-53-0	506.95	4.85e-07	3.89e-11	1170	8100	1800	900	5.13	6320000	14.236	15.48
504-63-2	76.1	2.76	1000000	283	1870	416	208	26.4	0.00021	4.108	-0.71
504-85-8	114.15	31.5	6330	239	1870	416	208	0.524	0.5674	6.03	1.89
505-10-2	106.18	37.3	47450	517	3240	720	360	14.8	0.08353	6.124	0.44
505-29-3	120.23	6.23	22040	419	3240	720	360	6.54	0.03396	3.535	1.38
505-32-8	296.54	0.00188	0.003893	1050	8100	1800	900	4.83	143.2	9.778	8.23
505-52-2	244.33	0.000211	46.75	467	1870	416	208	16.6	0.001101	12.218	3.67
505-57-7	98.15	629	5261	208	1870	416	208	5.6	11.74	4.279	1.58
505-73-7	182.21	0.00118	199400	431	1870	416	208	1.08	1.08e-06	11.362	-0.2
505-79-3	147.25	19.3	739.9	409	3240	720	360	18	3.847	4.992	2.37
506-03-6	316.53	2.07e-06	0.04798	509	3240	720	360	5.04	0.01363	11.456	6.22
506-12-7	270.46	0.00379	0.01946	283	1870	416	208	12.2	52.62	10.254	7.45
506-30-9	312.54	0.0193	0.0002999	466	3240	720	360	10.1	20150	11.725	8.93
506-32-1	304.48	0.000369	0.03141	535	3240	720	360	0.355	3.58	9.638	8.07
506-46-7	396.7	3.85e-06	5.78e-07	501	3240	720	360	7.6	2645	13.566	11.87
506-50-3	452.81	2.29e-07	5.41e-09	522	3240	720	360	6.51	19200	15.044	13.84
506-87-6	96.09	8.04e-08	1000000	601	3240	720	360	100000	7.73e-12	15.752	-1.49
507-09-5	76.11	6730	101600	187	3240	720	360	21.4	5.044	2.21	0.14
507-70-0	154.25	0.0572	1186	833	8100	1800	900	22.5	0.007439	5.939	2.85
508-02-1	456.72	2.66e-12	0.001748	6360	38900	8640	4320	1.34	6.93e-07	15.353	7.95
508-32-7	136.24	224	7.484	144	8100	1800	900	89.8	4077	3.331	4.13
510-13-4	346.48	6.47e-08	0.5881	8310	38900	8640	4320	1.25	3.81e-05	15.575	4.74
511-15-9	286.46	0.000138	0.03402	3280	13000	2880	1440	1.93	1.168	11.149	7.28
511-59-1	204.36	4.88	0.02557	213	8100	1800	900	0.46	39000	5.19	6.64
512-13-0	154.25	3.3	461.4	786	8100	1800	900	23.2	1.101	6.116	2.85
512-61-8	204.36	7.56	0.03917	634	8100	1800	900	0.519	39440	5.279	6.43
512-69-6	504.45	4.09e-20	1000000	452	1870	416	208	1.43	2.07e-23	21.016	-6.76
513-44-0	90.18	8150	1723	88.9	3240	720	360	5.7	426.4	2.782	2.18
513-53-1	90.18	9640	1723	89.1	3240	720	360	6.42	504.5	2.708	2.18
513-85-9	90.12	22.9	759300	331	1870	416	208	14.8	0.002722	5.009	-0.36
513-86-0	88.11	266	833300	332	3240	720	360	24.9	0.02819	3.016	-0.36
514-10-3	302.46	4.26e-05	0.0896	1220	8100	1800	900	0.0267	0.1436	10.019	6.46
514-51-2	204.36	3.25	0.1165	279	8100	1800	900	0.452	5706	4.897	5.87
514-78-3	564.86	3.52e-12	2.48e-10	4480	38900	8640	4320	0.217	8.03	17.844	14.1
515-00-4	152.24	1.82	426.9	428	3240	720	360	0.518	0.6514	6.766	2.8
515-03-7	308.51	0.409	0.08174	4080	38900	8640	4320	4.26	1540	9.896	6
515-69-5	222.37	0.0182	1.688	1050	8100	1800	900	0.257	2.389	8.189	5.63
515-98-0	107.11	2.73e-05	1000000	587	3240	720	360	106	2.93e-09	9.812	-3.84
516-06-3	117.15	1.22e-06	74460	375	1870	416	208	6.28	1.92e-09	4.709	-2.08
518-34-3	622.77	6.21e-14	1.356e-05	15100	38900	8640	4320	0.629	2.85e-06	25.31	7.99
518-47-8	376.28	2.15e-15	1247	2510	8100	1800	900	1.91	6.48e-16	13.267	-0.67
518-82-1	270.24	8.91e-10	2.042	2040	8100	1800	900	1.28	1.18e-07	16.602	4.01
519-02-8	248.37	0.00149	831.5	1840	8100	1800	900	2.64	0.000442	10.988	1.71
519-34-6	262.22	2.44e-09	834.5	797	3240	720	360	1.28	7.67e-10	20.114	2.3
520-18-3	286.24	1.4e-11	1191	766	3240	720	360	0.761	3.36e-12	16.546	1.96
520-26-3	610.57	1.64e-24	2125	1860	8100	1800	900	0.698	4.71e-25	30.018	-0.72
520-27-4	608.56	8.42e-25	407.8	1860	8100	1800	900	0.571	1.26e-24	30.635	-0.48
520-33-2	302.29	1.51e-09	272.5	1860	8100	1800	900	1.03	1.69e-09	18.75	2.44
520-36-5	270.24	1.77e-10	182.5	1870	8100	1800	900	0.781	2.63e-10	17.699	2.84
520-45-6	168.15	0.189	13590	636	3240	720	360	2.87	0.002342	8.93	0.78
521-13-1	456.76	6.06e-07	9.34e-07	1850	13000	2880	1440	1.32	296	10.835	10.73
522-51-0	527.59	2.88e-14	0.007969	15100	38900	8640	4320	1.1	1.91e-09	22.923	4.29
522-75-8	296.36	6.61e-09	12.42	1860	8100	1800	900	6.75	1.58e-07	14.259	3.53
525-79-1	215.22	2.34e-07	11240	1860	8100	1800	900	0.83	4.47e-09	12.895	0.6
526-75-0	122.17	3.24	2855	463	3240	720	360	3.2	0.1386	7	2.61
526-95-4	196.16	1.09e-07	1000000	126	503	112	55.9	6.06	2.14e-11	8.843	-1.87
526-99-8	210.14	3.28e-09	1000000	125	503	112	55.9	7.4	6.89e-13	8.387	-2.51
527-07-1	218.14	9.63e-16	1000000	89.3	503	112	55.9	6.73	2.1e-19	4.721	-5.99
527-60-6	136.2	2.73	1539	1050	8100	1800	900	10.5	0.2407	6.703	3.15
527-84-4	134.22	141	16.08	212	3240	720	360	30.1	1180	4.712	4
528-43-8	266.34	4.37e-07	1.244	3160	8100	1800	900	1.9	9.363e-05	14.995	5.58
528-79-0	192.26	3.8	40.9	427	3240	720	360	29.3	17.86	5.835	3.59
529-05-5	184.28	2.19	0.2979	176	3240	720	360	0.332	1353	4.595	5.51
529-20-4	120.15	48.1	1178	353	3240	720	360	13.7	4.909	5.478	2.26
529-33-9	148.21	0.168	5093	504	3240	720	360	14	0.004889	7.099	2.42
529-44-2	318.24	9.12e-15	2234	774	3240	720	360	0.761	1.3e-15	23.972	1.42
530-44-9	225.29	0.00705	46.7	1130	8100	1800	900	1.27	0.03402	9.218	3.32
530-56-3	184.19	0.000757	105000	647	3240	720	360	1.25	1.33e-06	11.74	0.25
530-57-4	198.18	5.33e-05	5783	640	3240	720	360	5.48	1.83e-06	12.832	1.04
530-59-6	224.22	5.23e-05	7082	693	3240	720	360	1.38	1.66e-06	13.955	1.24
531-26-0	268.31	0.000914	2.583	1110	8100	1800	900	3.2	0.095	8.867	4.52
531-75-9	340.29	5.17e-14	206000	640	3240	720	360	2.12	8.55e-17	18.491	-1.71
531-95-3	242.28	1.76e-06	72.3	2050	8100	1800	900	1.18	5.9e-06	14.803	3.67
532-02-5	230.21	4.76e-11	997400	624	3240	720	360	55.6	1.1e-14	6.216	-1.78
532-32-1	144.11	4.89e-07	1000000	576	3240	720	360	144	7.05e-11	3.081	-2.27
532-87-6	272.48	0.0734	4.626e-05	303	8100	1800	900	0.167	432700	6.966	9.42
533-18-6	150.18	32.2	1703	410	3240	720	360	65.5	2.833	4.464	2.14
533-31-3	138.12	0.919	14650	407	3240	720	360	1.27	0.00866	9.144	1.57
533-73-3	126.11	0.00712	122200	771	3240	720	360	1.28	7.35e-06	13.155	0.55
533-74-4	162.27	0.0553	19360	1480	8100	1800	900	0.901	0.0004638	8.321	0.94
533-75-5	122.12	0.08	34760	326	3240	720	360	3.31	0.000281	3.885	0.38
533-96-0	105.99	1.32e-14	1000000	537	3240	720	360	100000	1.4e-18	0.413	-6.19
534-15-6	90.12	23600	80270	268	3240	720	360	28.9	26.49	2.782	0.22
534-22-5	82.1	21500	3410	109	3240	720	360	4.15	516.8	2.465	1.91
536-45-8	152.15	0.0192	1573	555	3240	720	360	27.6	0.001857	8.542	1.96
536-50-5	136.2	3.08	5083	472	3240	720	360	19.2	0.08252	6.925	2.04
536-59-4	152.24	0.638	471	424	3240	720	360	0.458	0.206	6.415	3.36
536-60-7	150.22	0.422	1687	557	3240	720	360	22.3	0.03751	7.292	2.53
536-74-3	102.14	739	796.2	365	3240	720	360	30.7	94.75	4.135	2.26
536-75-4	107.16	226	86460	993	8100	1800	900	127	0.2793	5.11	1.84
536-78-7	107.16	264	84780	987	8100	1800	900	127	0.3337	5.031	1.84
537-32-6	308.29	1.84e-06	1000000	298	1870	416	208	16.4	5.67e-10	0.825	-2.37
537-55-3	223.23	4.55e-07	9383	701	3240	720	360	4.64	1.08e-08	16.1	0.62
538-23-8	470.7	8.91	1.524e-05	412	1870	416	208	8.46	275500000	14.131	9.2
538-24-9	639.02	2.59e-11	1.14e-11	520	3240	720	360	5.43	1449	18.553	15.1
538-43-2	168.19	0.00275	15830	631	3240	720	360	5.96	2.918e-05	8.213	0.86
538-65-8	204.27	0.317	22.29	469	3240	720	360	7.14	2.908	7.232	3.83
538-71-6	414.47	4.09e-09	0.641	2970	8100	1800	900	2.98	2.65e-06	14.955	4.2
538-86-3	122.17	208	2259	393	3240	720	360	22.6	11.25	4.359	1.77
539-30-0	136.2	96.1	1242	450	3240	720	360	15.4	10.54	4.583	2.27
539-32-2	135.21	34.7	6761	470	3240	720	360	53.5	0.6932	5.958	2.83
539-82-2	130.19	640	925.9	190	1870	416	208	54.1	89.98	4.158	2.34
539-88-8	144.17	36	45660	592	3240	720	360	68.4	0.1137	5.36	0.29
539-90-2	144.22	387	356.7	208	3240	720	360	41.2	156.9	4.289	2.76
540-07-8	186.3	13	10.87	203	1870	416	208	24.5	222.1	5.461	4.3
540-10-3	480.87	2e-06	3.13e-10	502	3240	720	360	6.39	3068000	13.186	14.61
540-18-1	158.24	91.5	101.9	188	1870	416	208	33.6	142	4.726	3.32
540-42-1	130.19	972	1070	192	3240	720	360	51.2	118.3	3.834	2.26
540-59-0	96.94	33800	2338	157	8100	1800	900	98.7	1404	2.778	1.98
540-63-6	94.19	643	11220	389	3240	720	360	3.1	5.406	3.509	1.21
540-84-1	114.23	5950	9.91	123	8100	1800	900	69.8	68540	1.996	4.09
540-88-5	116.16	5680	3254	186	3240	720	360	570	202.7	3.213	1.74
540-97-6	444.93	4.74	0.005266	1750	13000	2880	1440	143	399900	8.427	9.08
541-02-6	370.78	29.1	0.01419	732	8100	1800	900	166	759400	6.933	7.93
541-05-9	222.47	439	1.55	216	8100	1800	900	494	62960	5.226	5.64
541-15-1	197.66	4.7e-09	1000000	414	1870	416	208	9.77	9.28e-13	13.607	-5.48
541-31-1	104.21	2090	599.2	91.9	3240	720	360	5.63	361.7	3.149	2.67
541-35-5	87.12	2.58	191100	596	3240	720	360	38.5	0.001179	5.884	-0.18
541-47-9	100.12	19.4	18450	246	1870	416	208	2.56	0.1056	5.938	1.4
541-58-2	113.18	643	1750	469	3240	720	360	54	41.65	5.809	2.09
541-85-5	128.22	458	1371	271	3240	720	360	19.9	42.89	4.229	2.15
541-91-3	238.42	0.0625	0.2213	972	8100	1800	900	8.61	67.37	7.409	5.96
542-28-9	100.12	18.4	232600	356	3240	720	360	51.1	0.007919	1.905	0.19
542-40-5	380.49	2.33e-09	0.005225	1280	3240	720	360	0.375	0.0001699	16.027	7.36
542-46-1	250.43	0.0452	0.09556	1070	8100	1800	900	0.96	118.4	7.694	6.31
542-55-2	102.13	5390	10350	173	3240	720	360	56.3	53.28	2.896	1.23
542-75-6	110.97	2970	1994	144	8100	1800	900	17.6	165.5	2.868	2.29
543-39-5	154.25	12.2	260.9	767	8100	1800	900	2.03	7.204	6.383	3.46
543-49-7	116.21	115	3569	229	1870	416	208	18.1	3.738	4.953	2.24
544-12-7	100.16	125	16000	235	1870	416	208	1.51	0.782	4.808	1.61
544-25-2	92.14	2840	202.6	154	3240	720	360	1.74	1291	3.356	3.02
544-31-0	299.5	1.47e-07	0.4431	770	3240	720	360	7.02	9.913e-05	13.799	5.21
544-35-4	308.51	0.00665	0.0009081	474	3240	720	360	0.69	2260	8.453	8.29
544-40-1	146.29	101	39.35	154	1870	416	208	6.86	375.2	4.625	3.87
544-60-5	299.5	1.01e-06	0.8852	857	3240	720	360	1.31	0.0003424	15.906	4.85
544-62-7	344.58	3.44e-07	0.00473	515	3240	720	360	4.78	0.02506	12.189	7.2
544-63-8	228.38	0.0346	0.4668	300	1870	416	208	15.3	16.96	10.804	5.98
544-76-3	226.45	0.929	0.0009193	191	1870	416	208	10.3	228600	6.914	8.2
545-48-2	442.73	9.7e-11	0.0001877	6220	38900	8640	4320	1.31	0.0002289	11.718	8.13
546-28-1	204.36	6.08	0.1289	262	8100	1800	900	3.49	9639	4.742	5.82
546-49-6	152.24	147	172	613	8100	1800	900	1.45	131	5.305	3.09
546-79-2	154.25	13.2	440.5	904	8100	1800	900	35.4	4.608	6.752	3.19
546-80-5	152.24	59.8	407.7	905	8100	1800	900	50.1	22.35	5.193	2.65
547-57-9	294.28	1.73e-10	4773	1780	8100	1800	900	1.28	1.07e-11	18.207	0.69
547-63-7	102.13	6880	9268	214	3240	720	360	223	75.81	3.178	1.28
547-64-8	104.11	241	1000000	226	1870	416	208	91.7	0.02512	2.159	-0.67
547-65-9	98.1	70.2	96340	320	3240	720	360	8.41	0.07141	2.683	0.1
548-26-5	691.86	3.39e-18	1090	7890	38900	8640	4320	1.4	2.15e-18	15.9	-1.68
551-08-6	188.23	0.0159	353.5	422	3240	720	360	1.18	0.008448	4.795	2.52
551-93-9	135.17	3.44	3555	1130	8100	1800	900	2.61	0.1308	8.478	1.57
552-02-3	222.37	0.0164	11.98	1070	8100	1800	900	14.9	0.3044	7.932	4.63
552-30-7	192.13	7.59e-05	1036	640	3240	720	360	322	1.407e-05	10.231	1.95
552-41-0	166.18	0.145	4965	435	3240	720	360	1.28	0.004819	7.488	2.05
553-60-6	165.19	7.67	3084	644	3240	720	360	68	0.4106	7.035	1.55
553-90-2	118.09	139	142500	384	3240	720	360	590	0.1149	3.75	-0.58
554-12-1	88.11	11700	24110	253	3240	720	360	257	42.83	2.988	0.86
554-14-3	98.16	2890	1212	160	3240	720	360	10.3	234.3	3.336	2.36
554-84-7	139.11	0.157	6290	765	3240	720	360	84.1	0.003479	9.087	1.91
555-10-2	136.24	260	2.452	73.7	3240	720	360	0.764	14450	3.67	4.7
555-43-1	891.51	7.15e-15	6.53e-21	1160	8100	1800	900	3.53	18210000000	25.179	23.94
555-44-2	807.35	0.074	7.96e-18	1060	8100	1800	900	4	13530000	22.967	20.99
555-45-3	723.18	0.074	9.6e-15	463	3240	720	360	4.6	5.58e+15	20.755	18.04
555-96-4	122.17	15.4	24580	718	3240	720	360	3.36	0.07687	7.692	0.71
556-02-5	181.19	2.47e-07	97100	732	3240	720	360	3.21	4.6e-10	10.252	-1.76
556-03-6	181.19	2.47e-07	97100	732	3240	720	360	3.21	4.6e-10	10.252	-1.76
556-24-1	116.16	2440	2892	209	3240	720	360	77.9	98	3.596	1.77
556-50-3	132.12	3.17e-05	1000000	587	3240	720	360	7.05	4.19e-09	9.595	-2.09
556-52-5	74.08	746	1000000	576	3240	720	360	55.1	0.05521	5.672	-1.09
556-61-6	73.11	1620	21130	358	3240	720	360	1890	5.628	3.677	1.3
556-67-2	296.62	158	0.06124	397	8100	1800	900	254	762000	6.06	6.79
556-82-1	86.13	314	40940	331	3240	720	360	0.513	0.6619	4.419	1.17
557-00-6	144.22	406	356.7	208	3240	720	360	41.2	164.4	4.289	2.76
557-48-2	138.21	31.1	318.8	370	3240	720	360	1.18	13.47	4.921	2.84
557-58-4	278.44	8.42e-05	0.04157	487	3240	720	360	2.18	0.5635	10.867	7.01
562-73-2	192.17	2.15e-07	1000000	413	1870	416	208	6.32	4.13e-11	7.058	-2.45
562-74-3	154.25	5.7	386.6	863	8100	1800	900	0.508	2.271	6.45	3.33
562-90-3	264.27	0.186	78570	1280	8100	1800	900	1520	0.0006233	5.651	-0.7
563-80-4	86.13	7260	24360	282	3240	720	360	89.4	25.69	3.24	0.67
564-20-5	250.38	0.00429	11.99	1620	13000	2880	1440	18.5	0.08965	5.472	3.86
564-94-3	150.22	17	215.9	603	8100	1800	900	4.2	11.87	5.521	2.78
565-00-4	136.24	237	6.275	101	8100	1800	900	4.74	5152	3.402	4.35
565-60-6	102.18	430	13800	347	3240	720	360	19.6	3.179	4.823	1.68
565-61-7	100.16	2730	11820	310	3240	720	360	41.2	23.05	3.684	1.16
565-62-8	98.15	2550	8035	280	3240	720	360	0.969	31.11	3.951	1.37
574-93-6	514.55	1.32e-18	1.75e-07	6270	13000	2880	1440	1.39	3.88e-09	29.018	9.85
575-61-1	222.25	0.000601	148.8	474	3240	720	360	0.788	0.0008981	6.816	2.75
576-15-8	159.19	0.227	2275	441	3240	720	360	1.67	0.01586	6.527	1.74
576-26-1	122.17	14	3615	456	3240	720	360	3.9	0.4731	5.926	2.61
576-37-4	194.14	8.81e-08	1000000	126	503	112	55.9	2.74	1.71e-11	12.797	-2.72
577-11-7	444.56	1.63e-12	0.06088	340	1870	416	208	11.2	1.19e-08	13.638	3.95
577-16-2	134.18	23.7	1123	442	3240	720	360	52.6	2.836	5.575	2.22
578-58-5	122.17	199	450.4	131	3240	720	360	9.39	53.88	4.582	2.62
579-07-7	148.16	15.8	8708	593	3240	720	360	137	0.2677	6.906	1.11
579-60-2	164.21	0.673	700.2	484	3240	720	360	1.07	0.1579	8.696	2.99
579-74-8	150.18	10.7	2114	402	3240	720	360	12.5	0.7615	6.445	1.75
579-93-1	241.25	5.82e-07	25.06	1300	8100	1800	900	37.2	5.61e-06	15.538	3.59
581-42-0	156.23	0.327	14.85	946	8100	1800	900	3.7	3.436	5.892	4.26
582-17-2	160.17	0.000114	6193	790	3240	720	360	1.28	2.94e-06	11.533	2.21
583-33-5	168.19	8.91	534.2	265	1870	416	208	14.5	2.808	4.9	2.42
583-39-1	150.2	4.79e-06	2895	476	3240	720	360	1.28	2.48e-07	7.498	1.93
583-58-4	107.16	134	52980	1010	8100	1800	900	176	0.2724	5.72	1.9
583-60-8	112.17	401	5142	376	3240	720	360	18.9	8.754	4.097	1.54
583-61-9	107.16	316	52980	990	8100	1800	900	176	0.6391	5.43	1.9
583-92-6	148.18	0.343	710200	587	3240	720	360	7.89	7.149e-05	8.228	-0.67
584-02-1	88.15	1140	37680	334	3240	720	360	21	2.673	4.302	1.26
584-03-2	90.12	9.97	220400	374	1870	416	208	16.2	0.004078	6.325	-0.29
584-79-2	302.42	0.0047	0.9838	1080	8100	1800	900	0.237	1.447	10.151	5.52
584-84-9	174.16	3.44	37.57	1130	8100	1800	900	36.3	15.95	7.083	3.74
584-85-0	240.26	4.13e-10	15750	653	3240	720	360	1.61	6.31e-12	15.229	-1.26
585-07-9	142.2	823	555.3	161	3240	720	360	8.78	210.6	4.398	2.64
585-24-0	146.19	13.1	61220	288	3240	720	360	36.8	0.03133	3.19	0.73
585-25-1	142.2	57.4	23840	410	3240	720	360	31.4	0.342	5.231	0.63
585-34-2	150.22	1.8	437.4	1050	8100	1800	900	3.47	0.6181	7.405	3.42
585-86-4	344.32	8.73e-14	1000000	128	503	112	55.9	1.56	3.01e-17	13.935	-5.53
585-88-6	344.32	2.99e-15	1000000	129	503	112	55.9	2.15	1.03e-18	13.155	-5.61
585-99-9	342.3	1.2e-12	1000000	414	1870	416	208	1.71	4.11e-16	11.557	-5.3
586-38-9	152.15	0.0986	1398	565	3240	720	360	35.6	0.01072	8.602	1.96
586-62-9	136.24	133	3.838	173	3240	720	360	0.147	4733	4.712	4.88
586-82-3	154.25	4.79	335.7	815	8100	1800	900	0.513	2.199	6.52	3.33
588-67-0	164.25	15	110.1	457	3240	720	360	11.2	22.28	5.426	3.25
588-68-1	208.26	0.0558	5.948	591	3240	720	360	19.5	1.956	7.283	4.48
589-18-4	122.17	1.45	14260	583	3240	720	360	26.3	0.01245	6.588	1.62
589-34-4	100.21	8300	23.22	90.9	3240	720	360	35.9	35790	1.884	3.71
589-35-5	102.18	227	11950	354	3240	720	360	25.7	1.938	4.893	1.75
589-37-7	102.18	366	1000000	681	3240	720	360	3.1	0.03733	6.785	-0.22
[truncated: 5,624 more rows]
