# Supplementary material for: High-throughput screening of chemicals as functional substitutes using structure-based classification models
Source: Royal Society of Chemistry journal article supplement (doi:10.1039/c6gc02744j), 2016-12-20
Supplement: c6gc02744j5.xlsx [file c6gc02744j5.xlsx]

## Sheet: SI Table 4
harmonized_function	true_positives	true_negatives	false_positives	false_negatives	similarity_threshold	bai_75th_percentile
additive	4549	15	2	225	0.363672	0
rubber additive	5572	7	3	224	0.51454	0.306818
adhesion promoter	4659	19	2	111	0.347157	0
antimicrobial	4175	133	42	441	0.514307	0.34375
antioxidant	4072	70	18	631	0.474321	0.242188
antistatic agent	4366	19	0	406	0.239076	0.046875
buffer	4269	30	5	487	0.51384	0.024858
catalyst	4250	104	30	407	0.488399	0.0625
chelator	5417	33	3	353	0.381275	0.0104167
colorant	4063	288	69	371	0.48595	0.125
crosslinker	4315	108	30	338	0.429042	0
emollient	4338	104	22	327	0.367567	0
emulsifier	4368	11	0	412	0.239742	0.15625
emulsion stabilizer	5040	19	2	745	0.33479	0.03125
film forming agent	4251	37	9	494	0.41565	0
flame retardant	4480	62	9	240	0.50682	0.125
flavorant	3968	539	105	1194	0.427786	0
foam boosting agent	5630	19	1	156
foamer	5560	9	2	235	0.477366	0
fragrance	2635	1291	193	672	0.413485	0.03125
hair conditioner	4184	66	11	530	0.421919	0.0625
hair dye	5213	95	9	489	0.363458	0.140625
heat stabilizer	4309	14	5	463	0.514528	0.145833
humectant	5422	7	5	372	0.574958	0
lubricating agent	5248	8	2	548	0.464121	0
monomer	4554	83	5	149	0.398346	0.0625
organic pigment	4502	94	1	194	0.367248	0.0625
oxidizer	5190	11	1	604	0.533822	0
photoinitiator	4537	12	3	239	0.461357	0.125
plasticizer	4355	22	7	407	0.400555	0.0625
preservative	4947	40	8	811	0.453895	0.291667
reducer	5177	25	1	603	0.338997	0.0390625
rheology modifier	5536	7	6	257	0.535517	0.0546875
skin conditioner	4050	117	37	587	0.457309	0.0625
skin protectant	4332	14	7	438	0.459895	0.203125
soluble dye	5447	19	0	340	0.28619	0.09375
surfactant	4333	136	10	312	0.331672	0.125
UV absorber	5093	70	16	627	0.436247	0.125
vinyl	4697	19	0	75	0.357025	0
wetting agent	5645	22	2	137	0.275409	0.0234375
whitener	5640	10	1	155	0.336329	0.34375
