# Supplementary material for: High-throughput screening of chemicals as functional substitutes using structure-based classification models
Source: Royal Society of Chemistry journal article supplement (doi:10.1039/c6gc02744j), 2016-12-20
Supplement: c6gc02744j6.xlsx [file c6gc02744j6.xlsx]

## Sheet: SI Table 5
casrn	harmonized_function	probability	bioactivity_index	prediction_classification
5138-18-1	additive	0.868	0	poor prediction
32449-92-6	additive	0.9234	0.0357143	poor prediction
69-65-8	additive	0.9802	0.0208333	functional substitute
50-70-4	additive	0.9802	0	true positive
608-66-2	additive	0.9802	0	candidate alternative
87-89-8	additive	0.953	0	candidate alternative
147-81-9	additive	0.9159	0	poor prediction
312-84-5	additive	0.8348	0	poor prediction
72-19-5	additive	0.849	0	poor prediction
924-49-2	additive	0.8677	0.0833333	poor prediction
6284-40-8	additive	0.9385	0.03125	functional substitute
7512-17-6	additive	0.8936	0	poor prediction
131-48-6	additive	0.886	0	poor prediction
33996-33-7	additive	0.8679	0.1875	poor prediction
31282-04-9	additive	0.8366	0.0416667	poor prediction
56180-94-0	additive	0.9011	0.125	functional substitute
372-09-8	additive	0.8436	0	poor prediction
625-45-6	additive	0.8048	0	candidate alternative
144-62-7	additive	0.8379	0.03125	functional substitute
110-99-6	additive	0.8279	0	candidate alternative
90-80-2	additive	0.9732	0	true positive
58-86-6	additive	0.9199	0	candidate alternative
1114-34-7	additive	0.9199	0	candidate alternative
87-79-6	additive	0.9471	0	candidate alternative
1562-00-1	additive	0.8045	0.0625	poor prediction
870-72-4	additive	0.8585	0	candidate alternative
56-40-6	additive	0.8252	0	poor prediction
338-69-2	additive	0.8121	0	poor prediction
1783-96-6	additive	0.8027	0	poor prediction
63-42-3	additive	0.9381	0	candidate alternative
585-86-4	additive	0.9415	0.1875	functional substitute
97-30-3	additive	0.9891	0	true positive
50-99-7	additive	0.9842	0	true positive
141-82-2	additive	0.8565	0	candidate alternative
59-23-4	additive	0.9819	0	candidate alternative
4618-18-2	additive	0.9539	0	candidate alternative
96-82-2	additive	0.9341	0	candidate alternative
1772-03-8	additive	0.942	0	candidate alternative
66-84-2	additive	0.942	0.0625	functional substitute
19408-46-9	additive	0.8818	0	poor prediction
134-03-2	additive	0.9162	0	candidate alternative
6381-77-7	additive	0.9126	0	candidate alternative
89-65-6	additive	0.9418	0	candidate alternative
50-81-7	additive	0.9418	0.0333333	true positive
57-50-1	additive	0.9591	0.0227273	true positive
21732-17-2	additive	0.829	0	poor prediction
1811-31-0	additive	0.8921	0	poor prediction
110-17-8	additive	0.8624	0.0625	true positive
124-64-1	additive	0.8313	0	poor prediction
87-99-0	additive	0.8737	0	candidate alternative
149-32-6	additive	0.8912	0	poor prediction
56-81-5	additive	0.8444	0	poor prediction
115-77-5	additive	0.8403	0.0625	poor prediction
110-16-7	additive	0.8624	0.0208333	functional substitute
62-74-8	additive	0.9526	0	poor prediction
7446-81-3	additive	0.8829	0	poor prediction
328-42-7	additive	0.8374	0	poor prediction
113-24-6	additive	0.9029	0	poor prediction
137-40-6	additive	0.8702	0	true positive
1703-58-8	additive	0.8384	0	candidate alternative
4767-03-7	additive	0.8702	0	poor prediction
127-09-3	additive	0.9734	0	true positive
5536-61-8	additive	0.8601	0	poor prediction
107-43-7	additive	0.8635	0	poor prediction
488-82-4	additive	0.8737	0	candidate alternative
526-99-8	additive	0.9657	0	candidate alternative
4408-78-0	additive	0.89	0	poor prediction
50-21-5	additive	0.9214	0.0208333	functional substitute
10326-41-7	additive	0.9214	0.0625	functional substitute
79-14-1	additive	0.8981	0	candidate alternative
133-37-9	additive	0.929	0	candidate alternative
590-47-6	additive	0.8551	0	poor prediction
6915-15-7	additive	0.9549	0	true positive
77-92-9	additive	0.9663	0.0227273	functional substitute
87-69-4	additive	0.929	0	candidate alternative
526-95-4	additive	0.9891	0	true positive
31138-65-5	additive	0.9497	0	candidate alternative
527-07-1	additive	0.9512	0	candidate alternative
7492-31-1	additive	0.9657	0	candidate alternative
461-05-2	additive	0.8829	0	poor prediction
541-05-9	adhesion promoter	0.8151	0	candidate alternative
107-46-0	adhesion promoter	0.802	0.0227273	functional substitute
84962-98-1	adhesion promoter	0.8933	0	poor prediction
1760-24-3	adhesion promoter	0.96	0	candidate alternative
82985-35-1	adhesion promoter	0.9833	0	true positive
919-30-2	adhesion promoter	0.9732	0	candidate alternative
2469-55-8	adhesion promoter	0.8969	0.0625	functional substitute
1185-55-3	adhesion promoter	0.8925	0	candidate alternative
1067-25-0	adhesion promoter	0.8506	0	candidate alternative
15332-99-7	adhesion promoter	0.9479	0	candidate alternative
78-08-0	adhesion promoter	0.9527	0	candidate alternative
4130-08-9	adhesion promoter	0.9304	0	candidate alternative
2627-95-4	adhesion promoter	0.8694	0	candidate alternative
2768-02-7	adhesion promoter	0.9585	0	candidate alternative
1873-88-7	adhesion promoter	0.8027	0	candidate alternative
1067-53-4	adhesion promoter	0.9536	0	candidate alternative
1112-39-6	adhesion promoter	0.8582	0	candidate alternative
107-51-7	adhesion promoter	0.8066	0	candidate alternative
919-31-3	adhesion promoter	0.9636	0	candidate alternative
541-02-6	adhesion promoter	0.813	0	candidate alternative
2530-85-0	adhesion promoter	0.845	0	candidate alternative
2897-60-1	adhesion promoter	0.9539	0	poor prediction
2530-83-8	adhesion promoter	0.9594	0.03125	poor prediction
4253-34-3	adhesion promoter	0.9017	0	candidate alternative
17689-77-9	adhesion promoter	0.9054	0	candidate alternative
2530-87-2	adhesion promoter	0.9428	0	candidate alternative
5089-70-3	adhesion promoter	0.9588	0	candidate alternative
2554-06-5	adhesion promoter	0.8602	0	candidate alternative
2996-92-1	adhesion promoter	0.9162	0	true positive
780-69-8	adhesion promoter	0.9101	0	candidate alternative
4420-74-0	adhesion promoter	0.9287	0	candidate alternative
14814-09-6	adhesion promoter	0.9769	0	true positive
17980-47-1	adhesion promoter	0.8751	0.0625	poor prediction
2761-24-2	adhesion promoter	0.819	0	candidate alternative
556-67-2	adhesion promoter	0.8038	0	candidate alternative
1000-05-1	adhesion promoter	0.8056	0	candidate alternative
3027-21-2	adhesion promoter	0.8738	0	candidate alternative
2031-67-6	adhesion promoter	0.9111	0	candidate alternative
23779-32-0	adhesion promoter	0.9496	0	candidate alternative
23432-62-4	adhesion promoter	0.9689	0	true positive
17945-05-0	adhesion promoter	0.9528	0	candidate alternative
3068-76-6	adhesion promoter	0.9421	0	candidate alternative
78-07-9	adhesion promoter	0.9057	0	candidate alternative
40372-72-3	adhesion promoter	0.8743	0	candidate alternative
26115-70-8	adhesion promoter	0.8322	0	candidate alternative
114369-43-6	antimicrobial	0.9025	0.3125	candidate alternative
88671-89-0	antimicrobial	0.8649	0	candidate alternative
66246-88-6	antimicrobial	0.8084	0.25	candidate alternative
97886-45-8	antimicrobial	0.8138	0	candidate alternative
79241-46-6	antimicrobial	0.8602	0.0625	true positive
69806-50-4	antimicrobial	0.8602	0	candidate alternative
6425-39-4	antimicrobial	0.8154	0	candidate alternative
7779-27-3	antimicrobial	0.8402	0	true positive
55-86-7	antimicrobial	0.8164	0.21875	candidate alternative
869-24-9	antimicrobial	0.8147	0	candidate alternative
4261-68-1	antimicrobial	0.8047	0.0833333	candidate alternative
5407-04-5	antimicrobial	0.805	0.0625	candidate alternative
2675-77-6	antimicrobial	0.8215	0	true positive
5051-62-7	antimicrobial	0.8827	0	poor prediction
637-32-1	antimicrobial	0.8515	0	poor prediction
1918-13-4	antimicrobial	0.8352	0	poor prediction
555-60-2	antimicrobial	0.8628	0.375	poor prediction
2898-13-7	antimicrobial	0.8248	0.0625	poor prediction
2818-69-1	antimicrobial	0.8079	0.0625	poor prediction
210880-92-5	antimicrobial	0.9043	0	candidate alternative
1192-52-5	antimicrobial	0.8047	0.25	true positive
69806-34-4	antimicrobial	0.896	0.1875	candidate alternative
52214-84-3	antimicrobial	0.8268	0.0625	poor prediction
2425-06-1	antimicrobial	0.8499	0.5	functional substitute
299-86-5	antimicrobial	0.8569	0.125	poor prediction
133-06-2	antimicrobial	0.9428	0.295455	true positive
1154-59-2	antimicrobial	0.8715	0.4375	functional substitute
79983-71-4	antimicrobial	0.933	0.3125	candidate alternative
60207-93-4	antimicrobial	0.8948	0.125	poor prediction
60207-90-1	antimicrobial	0.8515	0.28125	candidate alternative
41198-08-7	antimicrobial	0.8415	0.125	poor prediction
3778-73-2	antimicrobial	0.827	0.0208333	poor prediction
35691-65-7	antimicrobial	0.8612	0.3125	true positive
53251-94-8	antimicrobial	0.8398	0.166667	poor prediction
94361-06-5	antimicrobial	0.9551	0.0625	true positive
125225-28-7	antimicrobial	0.8836	0.5	functional substitute
131983-72-7	antimicrobial	0.8537	0.125	candidate alternative
125116-23-6	antimicrobial	0.8262	0.375	functional substitute
38083-17-9	antimicrobial	0.8888	0.0625	true positive
43121-43-3	antimicrobial	0.8466	0.0625	candidate alternative
63284-71-9	antimicrobial	0.8577	0.125	poor prediction
60168-88-9	antimicrobial	0.8726	0.25	poor prediction
17781-31-6	antimicrobial	0.8787	0.1875	poor prediction
86386-73-4	antimicrobial	0.9012	0	candidate alternative
76674-21-0	antimicrobial	0.914	0	candidate alternative
80-06-8	antimicrobial	0.905	0.25	candidate alternative
2642-82-2	antimicrobial	0.8526	0.375	functional substitute
55219-65-3	antimicrobial	0.9248	0	candidate alternative
76738-62-0	antimicrobial	0.919	0	candidate alternative
1777-82-8	antimicrobial	0.8477	0	true positive
19666-30-9	antimicrobial	0.8576	0.25	poor prediction
94-20-2	antimicrobial	0.8344	0	poor prediction
67747-09-5	antimicrobial	0.9079	0.28125	poor prediction
107534-96-3	antimicrobial	0.9315	0.09375	true positive
52645-53-1	antimicrobial	0.8419	0.0227273	true positive
15619-48-4	antimicrobial	0.8262	0.3125	candidate alternative
54-11-5	antimicrobial	0.8149	0.03125	true positive
27314-13-2	antimicrobial	0.8865	0.09375	candidate alternative
2164-17-2	antimicrobial	0.8768	0	candidate alternative
98730-04-2	antimicrobial	0.8401	0.1875	poor prediction
66332-96-5	antimicrobial	0.8542	0.0625	candidate alternative
61213-25-0	antimicrobial	0.8057	0.125	poor prediction
142459-58-3	antimicrobial	0.8972	0.125	candidate alternative
369-77-7	antimicrobial	0.9421	0.375	true positive
363-17-7	antimicrobial	0.8125	0.0625	poor prediction
3736-81-0	antimicrobial	0.8433	0.0625	poor prediction
116714-46-6	antimicrobial	0.8167	0	candidate alternative
64628-44-0	antimicrobial	0.88	0.0625	candidate alternative
75706-12-6	antimicrobial	0.8715	0.125	candidate alternative
154598-52-4	antimicrobial	0.8384	0.375	poor prediction
83164-33-4	antimicrobial	0.8793	0	candidate alternative
636-54-4	antimicrobial	0.84	0	poor prediction
64902-72-3	antimicrobial	0.8621	0.0625	poor prediction
16673-34-0	antimicrobial	0.8201	0	poor prediction
82097-50-5	antimicrobial	0.8139	0	poor prediction
80125-14-0	antimicrobial	0.8471	0	poor prediction
71320-77-9	antimicrobial	0.8462	0.107143	poor prediction
22204-91-7	antimicrobial	0.8393	0	poor prediction
61869-08-7	antimicrobial	0.8301	0.25	poor prediction
110488-70-5	antimicrobial	0.809	0.0625	poor prediction
87-10-5	antimicrobial	0.8397	0.416667	functional substitute
86811-58-7	antimicrobial	0.8122	0	candidate alternative
133-07-3	antimicrobial	0.9288	0.375	true positive
21440-97-1	antimicrobial	0.8432	0	poor prediction
15362-40-0	antimicrobial	0.8539	0.3125	poor prediction
14556-46-8	antimicrobial	0.8682	0	poor prediction
6933-90-0	antimicrobial	0.8043	0	poor prediction
53786-28-0	antimicrobial	0.8431	0	poor prediction
439-14-5	antimicrobial	0.8155	0.0625	poor prediction
2955-38-6	antimicrobial	0.8335	0.142857	poor prediction
50264-69-2	antimicrobial	0.8418	0.1875	poor prediction
22316-47-8	antimicrobial	0.9055	0	poor prediction
23950-58-5	antimicrobial	0.8871	0.03125	candidate alternative
112226-61-6	antimicrobial	0.901	0.0625	poor prediction
83121-18-0	antimicrobial	0.8472	0	candidate alternative
35367-38-5	antimicrobial	0.87	0.0625	candidate alternative
101-20-2	antimicrobial	0.9556	0.416667	true positive
36734-19-7	antimicrobial	0.8368	0.09375	candidate alternative
53786-46-2	antimicrobial	0.8865	0	poor prediction
188425-85-6	antimicrobial	0.8644	0	poor prediction
32809-16-8	antimicrobial	0.8189	0.125	poor prediction
126833-17-8	antimicrobial	0.8031	0.25	poor prediction
68367-52-2	antimicrobial	0.8141	0	poor prediction
175013-18-0	antimicrobial	0.8284	0.375	functional substitute
93-47-0	antimicrobial	0.8046	0	poor prediction
84087-01-4	antimicrobial	0.832	0	candidate alternative
90717-03-6	antimicrobial	0.8303	0	candidate alternative
68157-60-8	antimicrobial	0.8859	0.4375	functional substitute
35575-96-3	antimicrobial	0.8733	0.1875	poor prediction
2310-17-0	antimicrobial	0.8198	0.1875	poor prediction
21564-17-0	antimicrobial	0.8297	0.4375	true positive
3696-28-4	antimicrobial	0.9031	0.5	true positive
102625-70-7	antimicrobial	0.8391	0.0625	poor prediction
50-65-7	antimicrobial	0.8055	0.3125	candidate alternative
521-74-4	antimicrobial	0.9159	0.25	candidate alternative
130-26-7	antimicrobial	0.9156	0.3125	candidate alternative
83-73-8	antimicrobial	0.9044	0.1875	candidate alternative
15599-52-7	antimicrobial	0.9241	0.25	candidate alternative
773-76-2	antimicrobial	0.9025	0.3125	candidate alternative
72-80-0	antimicrobial	0.9133	0.3125	candidate alternative
92-04-6	antimicrobial	0.8228	0.1875	candidate alternative
130-16-5	antimicrobial	0.8855	0.25	candidate alternative
6385-58-6	antimicrobial	0.8429	0.625	functional substitute
97-24-5	antimicrobial	0.9413	0.4375	true positive
844-26-8	antimicrobial	0.8979	0.125	candidate alternative
13181-17-4	antimicrobial	0.8039	0.25	candidate alternative
320-72-9	antimicrobial	0.8457	0	candidate alternative
22494-42-4	antimicrobial	0.8256	0	candidate alternative
97-18-7	antimicrobial	0.8865	0.541667	functional substitute
4638-48-6	antimicrobial	0.8488	0.3125	candidate alternative
137-19-9	antimicrobial	0.88	0	candidate alternative
1689-83-4	antimicrobial	0.8676	0.375	functional substitute
933-78-8	antimicrobial	0.8195	0.3125	candidate alternative
95-95-4	antimicrobial	0.8386	0.0909091	candidate alternative
609-19-8	antimicrobial	0.9026	0.1875	candidate alternative
15950-66-0	antimicrobial	0.8903	0.125	candidate alternative
88-06-2	antimicrobial	0.8193	0	candidate alternative
935-95-5	antimicrobial	0.8773	0.3125	candidate alternative
1689-84-5	antimicrobial	0.8689	0.34375	candidate alternative
4901-51-3	antimicrobial	0.9119	0.4375	functional substitute
136-32-3	antimicrobial	0.92	0.1875	candidate alternative
118-79-6	antimicrobial	0.8477	0.125	candidate alternative
3380-34-5	antimicrobial	0.8742	0.3125	candidate alternative
305-85-1	antimicrobial	0.8032	0.166667	candidate alternative
608-71-9	antimicrobial	0.8572	0.3125	candidate alternative
87-86-5	antimicrobial	0.9269	0.3125	true positive
58-90-2	antimicrobial	0.8631	0.25	candidate alternative
933-75-5	antimicrobial	0.8214	0	candidate alternative
120-32-1	antimicrobial	0.9532	0.270833	true positive
80-00-2	antimicrobial	0.8018	0.0625	poor prediction
7281-04-1	antimicrobial	0.9421	0.5625	functional substitute
139-07-1	antimicrobial	0.8652	0.5	functional substitute
538-71-6	antimicrobial	0.9583	0.5625	true positive
122-19-0	antimicrobial	0.8529	0.6875	functional substitute
122-18-9	antimicrobial	0.9571	0.46875	true positive
140-72-7	antimicrobial	0.8799	0.5625	functional substitute
112-02-7	antimicrobial	0.9378	0.375	true positive
123-03-5	antimicrobial	0.9439	0.625	true positive
2748-88-1	antimicrobial	0.9308	0.416667	functional substitute
7173-51-5	antimicrobial	0.8422	0.625	functional substitute
2390-68-3	antimicrobial	0.8502	0.666667	functional substitute
5538-94-3	antimicrobial	0.9415	0.375	true positive
27668-52-6	antimicrobial	0.9249	0.166667	true positive
68959-20-6	antimicrobial	0.9088	0.25	true positive
1155-74-4	antimicrobial	0.9223	0.625	functional substitute
76-87-9	antimicrobial	0.8758	0.75	true positive
124-03-8	antimicrobial	0.9476	0.6875	true positive
112-03-8	antimicrobial	0.9083	0.6875	functional substitute
80-38-6	antimicrobial	0.8481	0	candidate alternative
18046-21-4	antimicrobial	0.8005	0.225	poor prediction
80-13-7	antimicrobial	0.8026	0.0625	candidate alternative
85264-33-1	antimicrobial	0.8123	0	true positive
2832-19-1	antimicrobial	0.8088	0	candidate alternative
650-51-1	antimicrobial	0.8979	0	true positive
57-09-0	antimicrobial	0.9655	0.46875	true positive
127-20-8	antimicrobial	0.8601	0	candidate alternative
140-95-4	antimicrobial	0.8624	0	true positive
1119-97-7	antimicrobial	0.862	0.5	functional substitute
4574-04-3	antimicrobial	0.8788	0.375	functional substitute
1119-94-4	antimicrobial	0.8376	0.5	functional substitute
112-00-5	antimicrobial	0.8188	0.3125	candidate alternative
2439-10-3	antimicrobial	0.8107	0.0625	true positive
116-25-6	antimicrobial	0.8462	0.0625	true positive
145-94-8	antimicrobial	0.835	0	candidate alternative
13347-42-7	antimicrobial	0.8029	0.0625	candidate alternative
89-68-9	antimicrobial	0.89	0.09375	true positive
1610-18-0	antimicrobial	0.8505	0	true positive
1610-17-9	antimicrobial	0.8069	0	candidate alternative
101-05-3	antimicrobial	0.8852	0	candidate alternative
7287-19-6	antimicrobial	0.8552	0	candidate alternative
834-12-8	antimicrobial	0.8398	0	candidate alternative
886-50-0	antimicrobial	0.8302	0.03125	candidate alternative
32889-48-8	antimicrobial	0.9029	0	candidate alternative
1014-70-6	antimicrobial	0.813	0	candidate alternative
22936-75-0	antimicrobial	0.8048	0	candidate alternative
118-23-0	antimicrobial	0.888	0.25	candidate alternative
848-53-3	antimicrobial	0.9211	0.0625	candidate alternative
23593-75-1	antimicrobial	0.918	0.46875	true positive
791-35-5	antimicrobial	0.8851	0	poor prediction
1215-83-4	antimicrobial	0.8921	0	poor prediction
28159-98-0	antimicrobial	0.8795	0.0625	true positive
17692-39-6	antimicrobial	0.8061	0.0625	candidate alternative
21725-46-2	antimicrobial	0.9173	0	candidate alternative
122-34-9	antimicrobial	0.9427	0	true positive
4776-06-1	antimicrobial	0.9169	0.464286	true positive
115-32-2	antimicrobial	0.8521	0.5	poor prediction
69806-40-2	antimicrobial	0.8209	0.125	candidate alternative
56296-78-7	antimicrobial	0.824	0.5625	poor prediction
54910-89-3	antimicrobial	0.824	0.1875	poor prediction
68694-11-1	antimicrobial	0.8471	0.3125	poor prediction
5915-41-3	antimicrobial	0.9546	0.125	true positive
122453-73-0	antimicrobial	0.8173	0.375	functional substitute
70-30-4	antimicrobial	0.875	0.5625	true positive
97-23-4	antimicrobial	0.9731	0.354167	true positive
79-95-8	antimicrobial	0.8383	0.25	candidate alternative
6170-42-9	antimicrobial	0.8102	0	poor prediction
139-40-2	antimicrobial	0.9403	0	candidate alternative
1912-24-9	antimicrobial	0.9295	0	candidate alternative
2971-36-0	antimicrobial	0.8152	0.40625	functional substitute
350-12-9	antimicrobial	0.8202	0.0833333	poor prediction
60628-96-8	antimicrobial	0.8424	0.25	true positive
2391-03-9	antimicrobial	0.9048	0	poor prediction
117-80-6	antimicrobial	0.8087	0.5625	true positive
119168-77-3	antimicrobial	0.8066	0.4375	poor prediction
66063-05-6	antimicrobial	0.8506	0.3125	candidate alternative
13684-63-4	antimicrobial	0.847	0.125	true positive
121-54-0	antimicrobial	0.9366	0.53125	true positive
2773-92-4	antimicrobial	0.8229	0.0625	candidate alternative
5786-21-0	antimicrobial	0.8021	0	poor prediction
28434-01-7	antimicrobial	0.811	0	candidate alternative
26002-80-2	antimicrobial	0.8157	0	true positive
1244-76-4	antimicrobial	0.8282	0.125	poor prediction
68-88-2	antimicrobial	0.8282	0.125	poor prediction
95-77-2	antimicrobial	0.8564	0.0625	candidate alternative
133-53-9	antimicrobial	0.9402	0.0625	true positive
88-04-0	antimicrobial	0.9035	0	true positive
10453-86-8	antimicrobial	0.811	0.125	true positive
131341-86-1	antimicrobial	0.8263	0.375	functional substitute
103577-45-3	antimicrobial	0.8343	0.1875	poor prediction
61-75-6	antimicrobial	0.9211	0	poor prediction
56343-98-7	antimicrobial	0.9209	0.0625	poor prediction
3505-38-2	antimicrobial	0.9021	0	poor prediction
17780-75-5	antimicrobial	0.8897	0.125	poor prediction
1163-36-6	antimicrobial	0.8772	0.0625	poor prediction
3689-76-7	antimicrobial	0.8659	0.1875	candidate alternative
84-02-6	antimicrobial	0.8011	0.3125	poor prediction
4789-68-8	antimicrobial	0.8667	0.125	poor prediction
2058-52-8	antimicrobial	0.821	0	poor prediction
549-68-8	antimicrobial	0.8117	0.416667	functional substitute
124495-18-7	antimicrobial	0.879	0.1875	poor prediction
28911-01-5	antimicrobial	0.8163	0	poor prediction
1018-71-9	antimicrobial	0.8221	0.416667	poor prediction
79559-97-0	antimicrobial	0.8487	0.25	poor prediction
22916-47-8	antimicrobial	0.845	0	candidate alternative
24169-02-6	antimicrobial	0.8954	0.604167	functional substitute
5598-15-2	antimicrobial	0.8639	0.3125	poor prediction
135410-20-7	antimicrobial	0.8292	0	candidate alternative
709-98-8	antimicrobial	0.8191	0.15625	candidate alternative
2971-90-6	antimicrobial	0.8935	0	candidate alternative
3060-89-7	antimicrobial	0.8809	0.125	candidate alternative
1746-81-2	antimicrobial	0.8121	0.0625	candidate alternative
150-68-5	antimicrobial	0.8543	0.03125	candidate alternative
140-38-5	antimicrobial	0.812	0	candidate alternative
95-25-0	antimicrobial	0.8668	0	candidate alternative
19932-84-4	antimicrobial	0.8106	0	candidate alternative
2008-58-4	antimicrobial	0.8557	0	candidate alternative
1698-60-8	antimicrobial	0.8215	0	poor prediction
129-81-7	antimicrobial	0.8416	0	candidate alternative
3158-91-6	antimicrobial	0.8298	0.25	poor prediction
1982-47-4	antimicrobial	0.9095	0.25	candidate alternative
4093-31-6	antimicrobial	0.8168	0	poor prediction
15310-01-7	antimicrobial	0.8491	0.125	candidate alternative
87-90-1	antimicrobial	0.949	0	candidate alternative
22663-37-2	antimicrobial	0.8366	0	poor prediction
10605-21-7	antimicrobial	0.8615	0.125	true positive
70-07-5	antimicrobial	0.8001	0	candidate alternative
77-65-6	antimicrobial	0.809	0	poor prediction
54-91-1	antimicrobial	0.8233	0	poor prediction
886-74-8	antimicrobial	0.8629	0	candidate alternative
71526-07-3	antimicrobial	0.8016	0	poor prediction
50471-44-8	antimicrobial	0.852	0.21875	poor prediction
2164-09-2	antimicrobial	0.8354	0.21875	candidate alternative
94-75-7	antimicrobial	0.8392	0.03125	candidate alternative
882-09-7	antimicrobial	0.8129	0	candidate alternative
3766-60-7	antimicrobial	0.9082	0.125	candidate alternative
120-36-5	antimicrobial	0.8412	0	candidate alternative
330-54-1	antimicrobial	0.9423	0.104167	true positive
2327-02-8	antimicrobial	0.8445	0	candidate alternative
6515-38-4	antimicrobial	0.8127	0.0625	poor prediction
56-95-1	antimicrobial	0.9783	0.625	true positive
55-56-1	antimicrobial	0.9783	0.479167	true positive
3697-42-5	antimicrobial	0.9783	0.6875	true positive
522-51-0	antimicrobial	0.8494	0.333333	true positive
56-35-9	antimicrobial	0.8473	0.5625	true positive
2155-70-6	antimicrobial	0.8125	0.75	true positive
4342-36-3	antimicrobial	0.8252	0.75	true positive
1941-30-6	antimicrobial	0.8228	0	candidate alternative
85-34-7	antimicrobial	0.8379	0.0625	candidate alternative
34645-84-6	antimicrobial	0.8447	0	candidate alternative
93-65-2	antimicrobial	0.8086	0	candidate alternative
83-05-6	antimicrobial	0.8287	0.125	candidate alternative
94-81-5	antimicrobial	0.8003	0	candidate alternative
126-06-7	antimicrobial	0.9942	0	true positive
16079-88-2	antimicrobial	0.9941	0	true positive
77-48-5	antimicrobial	0.9762	0.125	true positive
118-52-5	antimicrobial	0.9724	0.03125	true positive
51580-86-0	antimicrobial	0.967	0	true positive
2893-78-9	antimicrobial	0.967	0.0227273	true positive
2782-57-2	antimicrobial	0.9441	0	true positive
26172-55-4	antimicrobial	0.9007	0.0357143	true positive
999-81-5	antimicrobial	0.9048	0	true positive
51229-78-8	antimicrobial	0.942	0	true positive
104-29-0	antimicrobial	0.8558	0	true positive
3567-62-2	antimicrobial	0.8654	0.125	candidate alternative
93-76-5	antimicrobial	0.8711	0	candidate alternative
2702-72-9	antimicrobial	0.8348	0.0625	candidate alternative
2008-39-1	antimicrobial	0.9332	0	true positive
133855-98-8	antimicrobial	0.8488	0.1875	poor prediction
80-07-9	antimicrobial	0.8945	0.1875	candidate alternative
80-33-1	antimicrobial	0.9317	0.0625	true positive
116-29-0	antimicrobial	0.8371	0.1875	candidate alternative
13360-45-7	antimicrobial	0.937	0.125	candidate alternative
330-55-2	antimicrobial	0.9221	0.125	candidate alternative
101-27-9	antimicrobial	0.8729	0.3125	poor prediction
4462-55-9	antimicrobial	0.891	0	poor prediction
74115-24-5	antimicrobial	0.9503	0.03125	poor prediction
31036-80-3	antimicrobial	0.9346	0	candidate alternative
60207-31-0	antimicrobial	0.8998	0	poor prediction
25875-51-8	antimicrobial	0.9389	0.125	poor prediction
152-53-4	antimicrobial	0.9537	0.166667	poor prediction
50-31-7	antimicrobial	0.8312	0.0625	candidate alternative
719-32-4	antimicrobial	0.8366	0	candidate alternative
103112-35-2	antimicrobial	0.8412	0.3125	poor prediction
1085-98-9	antimicrobial	0.8429	0.5	poor prediction
731-27-1	antimicrobial	0.8252	0.4375	poor prediction
138261-41-3	antimicrobial	0.9632	0	true positive
111988-49-9	antimicrobial	0.9483	0	candidate alternative
150824-47-8	antimicrobial	0.9115	0	candidate alternative
153719-23-4	antimicrobial	0.9501	0	true positive
75438-57-2	antimicrobial	0.8808	0.0625	poor prediction
85371-64-8	antimicrobial	0.8387	0	poor prediction
93-72-1	antimicrobial	0.8667	0.0625	candidate alternative
116255-48-2	antimicrobial	0.8392	0.1875	poor prediction
119446-68-3	antimicrobial	0.8588	0.375	poor prediction
84392-17-6	antimicrobial	0.8348	0.0625	candidate alternative
29091-09-6	antimicrobial	0.8082	0.4375	functional substitute
10469-09-7	antimicrobial	0.8456	0.0625	poor prediction
1702-17-6	antimicrobial	0.8197	0.09375	poor prediction
17824-83-8	antimicrobial	0.8206	0.375	poor prediction
55335-06-3	antimicrobial	0.8877	0	poor prediction
2759-71-9	antimicrobial	0.8704	0.25	candidate alternative
594-65-0	antimicrobial	0.8139	0.0625	candidate alternative
144-48-9	antimicrobial	0.8078	0	candidate alternative
116-52-9	antimicrobial	0.8687	0	poor prediction
541-79-7	antimicrobial	0.8022	0	poor prediction
671-95-4	antimicrobial	0.8225	0	candidate alternative
98967-40-9	antimicrobial	0.8172	0	poor prediction
145701-23-1	antimicrobial	0.8167	0	poor prediction
145701-21-9	antimicrobial	0.8025	0.0625	poor prediction
10222-01-2	antimicrobial	0.9307	0.0625	true positive
777-11-7	antimicrobial	0.8122	0.333333	candidate alternative
120116-88-3	antimicrobial	0.8824	0.375	poor prediction
122836-35-5	antimicrobial	0.8944	0	poor prediction
169590-42-5	antimicrobial	0.8288	0.25	candidate alternative
120-97-8	antimicrobial	0.8688	0	poor prediction
17692-43-2	antimicrobial	0.8185	0.0833333	poor prediction
26644-46-2	antimicrobial	0.8387	0.0625	poor prediction
54965-21-8	antimicrobial	0.8224	0.09375	candidate alternative
1897-45-6	antimicrobial	0.9141	0.59375	true positive
97-16-5	antimicrobial	0.8964	0.125	candidate alternative
88485-37-4	antimicrobial	0.8098	0	poor prediction
7195-27-9	antimicrobial	0.8261	0	poor prediction
490-46-0	antioxidant	0.8734	0	candidate alternative
117-39-5	antioxidant	0.9859	0.21875	true positive
25973-55-1	antioxidant	0.8268	0	candidate alternative
2107-76-8	antioxidant	0.8423	0.0625	candidate alternative
3147-75-9	antioxidant	0.8641	0.0833333	candidate alternative
90-33-5	antioxidant	0.8306	0.125	candidate alternative
446-72-0	antioxidant	0.9306	0.354167	functional substitute
520-18-3	antioxidant	0.9838	0.28125	true positive
517-28-2	antioxidant	0.8424	0.0625	candidate alternative
32687-77-7	antioxidant	0.8607	0	candidate alternative
82-02-0	antioxidant	0.8215	0.0625	candidate alternative
6683-19-8	antioxidant	0.8041	0.1875	candidate alternative
36443-68-2	antioxidant	0.8053	0	candidate alternative
40601-76-1	antioxidant	0.9135	0.125	candidate alternative
96-69-5	antioxidant	0.9799	0.75	true positive
23288-49-5	antioxidant	0.9419	0	candidate alternative
491-80-5	antioxidant	0.9225	0.34375	functional substitute
70321-86-7	antioxidant	0.8116	0	candidate alternative
6051-87-2	antioxidant	0.8262	0.375	functional substitute
486-66-8	antioxidant	0.9014	0.25	functional substitute
149-91-7	antioxidant	0.875	0.03125	true positive
480-40-0	antioxidant	0.9298	0.4375	functional substitute
89-65-6	antioxidant	0.958	0	true positive
6381-77-7	antioxidant	0.9498	0	true positive
85-60-9	antioxidant	0.9792	0.75	true positive
134-03-2	antioxidant	0.9514	0	true positive
501-30-4	antioxidant	0.8255	0	true positive
645-35-2	antioxidant	0.8047	0	true positive
616-91-1	antioxidant	0.8784	0.03125	true positive
1953-02-2	antioxidant	0.8614	0	candidate alternative
485-72-3	antioxidant	0.8949	0.25	functional substitute
1620-98-0	antioxidant	0.8459	0	candidate alternative
38194-50-2	antioxidant	0.8182	0.0625	true positive
3236-71-3	antioxidant	0.805	0.625	poor prediction
2144-08-3	antioxidant	0.8635	0	candidate alternative
84-17-3	antioxidant	0.8145	0.1875	candidate alternative
4991-65-5	antioxidant	0.8293	0	candidate alternative
99-45-6	antioxidant	0.8064	0	candidate alternative
22888-70-6	antioxidant	0.871	0.09375	candidate alternative
520-36-5	antioxidant	0.9635	0.40625	true positive
89-86-1	antioxidant	0.826	0	candidate alternative
5613-46-7	antioxidant	0.9239	0.5625	functional substitute
90-30-2	antioxidant	0.823	0.28125	true positive
118-82-1	antioxidant	0.9642	0.03125	true positive
135-88-6	antioxidant	0.8528	0.3125	true positive
10081-67-1	antioxidant	0.8554	0.0625	true positive
15721-78-5	antioxidant	0.8003	0	candidate alternative
88107-10-2	antioxidant	0.816	0.125	candidate alternative
60-82-2	antioxidant	0.9063	0.3125	true positive
1421-63-2	antioxidant	0.8046	0	candidate alternative
2295-58-1	antioxidant	0.8073	0.0625	candidate alternative
1948-33-0	antioxidant	0.8511	0.196429	candidate alternative
3896-11-5	antioxidant	0.8112	0	candidate alternative
98-29-3	antioxidant	0.832	0.1875	candidate alternative
88-26-6	antioxidant	0.8334	0.1875	candidate alternative
732-26-3	antioxidant	0.9283	0.0625	true positive
4130-42-1	antioxidant	0.8961	0.03125	true positive
17540-75-9	antioxidant	0.9368	0.0625	true positive
728-40-5	antioxidant	0.8303	0.3125	functional substitute
88-27-7	antioxidant	0.9456	0.0625	true positive
50-81-7	antioxidant	0.958	0.0333333	candidate alternative
1491-59-4	antioxidant	0.9436	0	candidate alternative
88-58-4	antioxidant	0.9612	0.3125	true positive
37693-01-9	antioxidant	0.8818	0.5	functional substitute
93-69-6	antioxidant	0.8286	0	true positive
497-39-2	antioxidant	0.8293	0.5625	functional substitute
88-24-4	antioxidant	0.9845	0.625	true positive
119-47-1	antioxidant	0.9565	0.75	functional substitute
77-40-7	antioxidant	0.8703	0.3125	functional substitute
79-97-0	antioxidant	0.9328	0.3125	functional substitute
80-05-7	antioxidant	0.8695	0.375	functional substitute
6807-17-6	antioxidant	0.8862	0.5	functional substitute
27955-94-8	antioxidant	0.883	0.3125	functional substitute
500-38-9	antioxidant	0.9229	0.375	true positive
27686-84-6	antioxidant	0.9229	0.0833333	candidate alternative
52225-20-4	antioxidant	0.9024	0	candidate alternative
58-95-7	antioxidant	0.9024	0	true positive
43119-47-7	antioxidant	0.845	0	candidate alternative
4345-03-3	antioxidant	0.9217	0.0714286	true positive
54-28-4	antioxidant	0.8428	0	candidate alternative
119-13-1	antioxidant	0.844	0	candidate alternative
59-02-9	antioxidant	0.879	0	candidate alternative
521-35-7	antioxidant	0.86	0.666667	functional substitute
1972-08-3	antioxidant	0.8179	0.166667	candidate alternative
489-01-0	antioxidant	0.8453	0	candidate alternative
2772-45-4	antioxidant	0.907	0.65625	functional substitute
497-76-7	antioxidant	0.8472	0	true positive
79-74-3	antioxidant	0.9313	0.25	true positive
520-26-3	antioxidant	0.8989	0	candidate alternative
531-75-9	antioxidant	0.8172	0.25	functional substitute
10595-72-9	antioxidant	0.8397	0	true positive
84-16-2	antioxidant	0.9115	0.40625	functional substitute
520-27-4	antioxidant	0.9451	0.0625	true positive
153-18-4	antioxidant	0.9519	0.03125	true positive
102-87-4	antistatic agent	0.8993	0	true positive
27668-52-6	antistatic agent	0.805	0.166667	poor prediction
544-62-7	antistatic agent	0.8405	0.0625	functional substitute
25507-04-4	antistatic agent	0.8243	0	poor prediction
124-22-1	antistatic agent	0.8172	0.0625	true positive
112-90-3	antistatic agent	0.8293	0	true positive
112-75-4	antistatic agent	0.8288	0	candidate alternative
7617-74-5	antistatic agent	0.8898	0	candidate alternative
123-94-4	antistatic agent	0.8392	0	true positive
24602-86-6	antistatic agent	0.8841	0	poor prediction
544-31-0	antistatic agent	0.8584	0	candidate alternative
3179-80-4	antistatic agent	0.9894	0.625	true positive
1541-67-9	antistatic agent	0.922	0.5625	functional substitute
18924-66-8	antistatic agent	0.9328	0.5	functional substitute
143-27-1	antistatic agent	0.9331	0	true positive
124-28-7	antistatic agent	0.8888	0	candidate alternative
1541-81-7	antistatic agent	0.8655	0	poor prediction
112-69-6	antistatic agent	0.8856	0	candidate alternative
608-66-2	buffer	0.8396	0	candidate alternative
50-70-4	buffer	0.8396	0	candidate alternative
69-65-8	buffer	0.8396	0.0208333	candidate alternative
96-82-2	buffer	0.8917	0	true positive
56-40-6	buffer	0.811	0	candidate alternative
142-26-7	buffer	0.8499	0.0625	poor prediction
40391-99-9	buffer	0.811	0	poor prediction
25209-66-9	buffer	0.8471	0	poor prediction
5421-46-5	buffer	0.8543	0	poor prediction
156-57-0	buffer	0.8185	0	poor prediction
7529-22-8	buffer	0.8023	0	poor prediction
87-89-8	buffer	0.8191	0	candidate alternative
69-93-2	buffer	0.8318	0	true positive
147-81-9	buffer	0.8239	0	candidate alternative
144-62-7	buffer	0.9037	0.03125	functional substitute
72-19-5	buffer	0.8079	0	candidate alternative
924-49-2	buffer	0.87	0.0833333	functional substitute
6284-40-8	buffer	0.8673	0.03125	poor prediction
7512-17-6	buffer	0.8057	0	candidate alternative
33996-33-7	buffer	0.8459	0.1875	functional substitute
372-09-8	buffer	0.8787	0	poor prediction
625-45-6	buffer	0.8523	0	candidate alternative
110-99-6	buffer	0.8849	0	candidate alternative
54-86-4	buffer	0.8211	0	poor prediction
21732-17-2	buffer	0.8531	0	poor prediction
127-09-3	buffer	0.9203	0	candidate alternative
5138-18-1	buffer	0.8681	0	candidate alternative
4408-78-0	buffer	0.9067	0	poor prediction
50-21-5	buffer	0.9026	0.0208333	candidate alternative
312-84-5	buffer	0.8389	0	candidate alternative
141-82-2	buffer	0.9051	0	candidate alternative
461-58-5	buffer	0.8396	0	poor prediction
628-87-5	buffer	0.8544	0	poor prediction
75-75-2	buffer	0.8258	0	candidate alternative
75-59-2	buffer	0.8826	0.0625	poor prediction
75-57-0	buffer	0.8366	0	poor prediction
926-39-6	buffer	0.8139	0	poor prediction
107-35-7	buffer	0.8214	0.03125	functional substitute
4316-74-9	buffer	0.8254	0	candidate alternative
1562-00-1	buffer	0.8259	0.0625	functional substitute
870-72-4	buffer	0.8276	0	candidate alternative
107-21-1	buffer	0.8216	0.03125	poor prediction
110-65-6	buffer	0.8252	0	poor prediction
1115-70-4	buffer	0.8287	0.0625	functional substitute
657-24-9	buffer	0.8287	0	candidate alternative
306-37-6	buffer	0.8494	0	poor prediction
1937-19-5	buffer	0.8712	0.0625	poor prediction
2398-81-4	buffer	0.8416	0	poor prediction
593-85-1	buffer	0.9013	0	true positive
1762-95-4	buffer	0.8343	0	poor prediction
506-59-2	buffer	0.875	0	poor prediction
660-68-4	buffer	0.858	0	candidate alternative
593-81-7	buffer	0.8866	0	poor prediction
557-30-2	buffer	0.8052	0	poor prediction
79-19-6	buffer	0.8139	0.21875	poor prediction
1934-75-4	buffer	0.8267	0	poor prediction
142-64-3	buffer	0.828	0.0625	poor prediction
112-24-3	buffer	0.8077	0	candidate alternative
111-40-0	buffer	0.841	0.0454545	functional substitute
56-18-8	buffer	0.8646	0.0625	true positive
51-45-6	buffer	0.8358	0	poor prediction
138-92-1	buffer	0.8277	0	poor prediction
1187-42-4	buffer	0.8553	0.0625	poor prediction
1758-73-2	buffer	0.8471	0	poor prediction
111-94-4	buffer	0.807	0	candidate alternative
79-14-1	buffer	0.9511	0	true positive
104-98-3	buffer	0.8228	0.0625	functional substitute
1703-58-8	buffer	0.9109	0	candidate alternative
4767-03-7	buffer	0.8838	0	candidate alternative
502-85-2	buffer	0.8705	0.0833333	functional substitute
1116-54-7	buffer	0.8906	0	poor prediction
594-61-6	buffer	0.8553	0	candidate alternative
123-41-1	buffer	0.9096	0	candidate alternative
67-48-1	buffer	0.8996	0	candidate alternative
1927-06-6	buffer	0.8973	0	candidate alternative
108-01-0	buffer	0.9387	0.0227273	true positive
100-37-8	buffer	0.9632	0	true positive
622-40-2	buffer	0.9296	0.0625	functional substitute
103-76-4	buffer	0.9505	0.03125	functional substitute
110-97-4	buffer	0.8116	0	candidate alternative
122-20-3	buffer	0.8431	0.03125	functional substitute
111-41-1	buffer	0.9493	0	candidate alternative
4985-85-7	buffer	0.9541	0	candidate alternative
102-71-6	buffer	0.9813	0	candidate alternative
56-12-2	buffer	0.813	0	candidate alternative
140-07-8	buffer	0.9723	0.0625	true positive
156-54-7	buffer	0.8479	0	candidate alternative
110-15-6	buffer	0.8389	0.0208333	candidate alternative
124-64-1	buffer	0.8192	0	poor prediction
149-44-0	buffer	0.8255	0.0625	poor prediction
1185-53-1	buffer	0.8921	0	candidate alternative
77-86-1	buffer	0.8821	0	candidate alternative
299-75-2	buffer	0.8052	0	poor prediction
149-32-6	buffer	0.82	0	poor prediction
115-77-5	buffer	0.8072	0.0625	poor prediction
2079-89-2	buffer	0.8534	0	candidate alternative
110-17-8	buffer	0.882	0.0625	functional substitute
110-16-7	buffer	0.882	0.0208333	true positive
109-84-2	buffer	0.9196	0.0625	poor prediction
4023-65-8	buffer	0.8396	0	poor prediction
97-65-4	buffer	0.8061	0	poor prediction
7446-81-3	buffer	0.8741	0	candidate alternative
5536-61-8	buffer	0.8503	0	candidate alternative
328-42-7	buffer	0.822	0	poor prediction
113-24-6	buffer	0.8078	0	poor prediction
137-40-6	buffer	0.8503	0	candidate alternative
1704-62-7	buffer	0.8832	0	candidate alternative
139-87-7	buffer	0.971	0	candidate alternative
105-59-9	buffer	0.9748	0.0625	functional substitute
628-36-4	buffer	0.815	0	poor prediction
139-13-9	buffer	0.8139	0	candidate alternative
590-46-5	buffer	0.8051	0	poor prediction
107-43-7	buffer	0.8461	0	poor prediction
590-47-6	buffer	0.8528	0	poor prediction
526-99-8	buffer	0.9393	0	candidate alternative
7492-31-1	buffer	0.9393	0	candidate alternative
527-07-1	buffer	0.9271	0	candidate alternative
31138-65-5	buffer	0.9094	0	candidate alternative
526-95-4	buffer	0.9376	0	candidate alternative
461-05-2	buffer	0.8909	0	candidate alternative
3012-65-5	buffer	0.9418	0	true positive
77-92-9	buffer	0.9493	0.0227273	candidate alternative
6915-15-7	buffer	0.9486	0	candidate alternative
87-69-4	buffer	0.9625	0	candidate alternative
133-37-9	buffer	0.9625	0	candidate alternative
10326-41-7	buffer	0.9026	0.0625	functional substitute
563-41-7	buffer	0.861	0	poor prediction
546-88-3	buffer	0.8015	0.0625	poor prediction
1111-78-0	buffer	0.9356	0	true positive
97-59-6	buffer	0.8243	0.0416667	functional substitute
102-81-8	buffer	0.8147	0	true positive
102-79-4	buffer	0.9397	0	true positive
5856-63-3	buffer	0.8206	0	candidate alternative
115-70-8	buffer	0.8305	0	candidate alternative
124-68-5	buffer	0.8741	0	candidate alternative
78-96-6	buffer	0.8089	0	candidate alternative
141-43-5	buffer	0.9394	0	candidate alternative
929-06-6	buffer	0.8717	0	candidate alternative
126-11-4	buffer	0.8427	0.03125	poor prediction
4620-70-6	buffer	0.8808	0	candidate alternative
109-83-1	buffer	0.9693	0	true positive
140-95-4	buffer	0.8123	0	poor prediction
62-74-8	buffer	0.8847	0	poor prediction
16045-92-4	buffer	0.8348	0	poor prediction
3926-62-3	buffer	0.8461	0	poor prediction
67-52-7	buffer	0.822	0	candidate alternative
496-46-8	buffer	0.8222	0	poor prediction
14721-76-7	buffer	0.8089	0	poor prediction
110-73-6	buffer	0.9716	0.0625	true positive
111-42-2	buffer	0.9464	0	candidate alternative
76-87-9	catalyst	0.8351	0.75	poor prediction
2638-94-0	catalyst	0.8657	0	true positive
103-83-3	catalyst	0.805	0	true positive
78-67-1	catalyst	0.8462	0	true positive
78-11-5	catalyst	0.8142	0	poor prediction
75-57-0	catalyst	0.807	0	true positive
71-91-0	catalyst	0.896	0	true positive
947-02-4	catalyst	0.8193	0	poor prediction
95-32-9	catalyst	0.8912	0.21875	functional substitute
102-77-2	catalyst	0.9199	0.125	true positive
21564-17-0	catalyst	0.9165	0.4375	functional substitute
95-31-8	catalyst	0.9642	0.125	true positive
120-78-5	catalyst	0.9293	0	true positive
94-37-1	catalyst	0.8192	0.25	functional substitute
614-45-9	catalyst	0.9486	0	true positive
95-33-0	catalyst	0.9489	0.181818	true positive
137-29-1	catalyst	0.9548	0.5	functional substitute
137-30-4	catalyst	0.9733	0.71875	true positive
14324-55-1	catalyst	0.9603	0.6875	true positive
8018-01-7	catalyst	0.8823	0	candidate alternative
12427-38-2	catalyst	0.8823	0	candidate alternative
97-74-5	catalyst	0.9133	0.270833	true positive
137-26-8	catalyst	0.9276	0.291667	true positive
97-77-8	catalyst	0.8176	0.229167	functional substitute
280-57-9	catalyst	0.8119	0	true positive
56-93-9	catalyst	0.848	0.03125	true positive
1949-20-8	catalyst	0.8325	0	candidate alternative
900-95-8	catalyst	0.8483	0.75	functional substitute
4979-32-2	catalyst	0.8956	0	true positive
77-58-7	catalyst	0.8639	0	true positive
80-15-9	catalyst	0.9063	0	true positive
4712-55-4	catalyst	0.858	0.0625	true positive
121-69-7	catalyst	0.8866	0.03125	true positive
91-66-7	catalyst	0.8659	0.03125	true positive
99-97-8	catalyst	0.8497	0.0625	true positive
110-82-7	catalyst	0.814	0	true positive
109-99-9	catalyst	0.8042	0	true positive
110-54-3	catalyst	0.8689	0	true positive
142-82-5	catalyst	0.8209	0.0625	true positive
109-66-0	catalyst	0.8654	0.0357143	true positive
3115-68-2	catalyst	0.849	0.0625	true positive
2304-30-5	catalyst	0.8463	0.0625	true positive
1067-33-0	catalyst	0.8824	0.25	true positive
78-63-7	catalyst	0.985	0	true positive
94-36-0	catalyst	0.9368	0	true positive
13472-08-7	catalyst	0.8712	0	true positive
56375-79-2	catalyst	0.9169	0	true positive
1643-19-2	catalyst	0.8963	0.0625	true positive
1941-30-6	catalyst	0.8659	0	candidate alternative
2094-98-6	catalyst	0.8915	0	true positive
6425-39-4	catalyst	0.8311	0	true positive
533-74-4	catalyst	0.8014	0.15625	poor prediction
791-28-6	catalyst	0.8523	0	candidate alternative
838-85-7	catalyst	0.8455	0	candidate alternative
1571-33-1	catalyst	0.8482	0	true positive
102-06-7	catalyst	0.8956	0.15625	true positive
102-08-9	catalyst	0.909	0.0625	true positive
80-43-3	catalyst	0.9349	0.125	true positive
34443-12-4	catalyst	0.9617	0	true positive
7077-34-1	catalyst	0.8192	0	poor prediction
110-05-4	catalyst	0.9642	0	true positive
62-33-9	chelator	0.999	0	true positive
142-73-4	chelator	0.9071	0	candidate alternative
139-13-9	chelator	0.992	0	candidate alternative
67-42-5	chelator	0.9606	0.125	functional substitute
120066-54-8	chelator	0.899	0.0714286	poor prediction
67-43-6	chelator	0.9978	0.125	true positive
60-00-4	chelator	0.999	0	candidate alternative
526-99-8	chelator	0.8875	0	true positive
7492-31-1	chelator	0.8875	0	candidate alternative
527-07-1	chelator	0.888	0	candidate alternative
31138-65-5	chelator	0.888	0	true positive
526-95-4	chelator	0.888	0	candidate alternative
4408-78-0	chelator	0.9424	0	candidate alternative
72-19-5	chelator	0.8142	0	poor prediction
312-84-5	chelator	0.8115	0	poor prediction
299-27-4	chelator	0.888	0	candidate alternative
407-41-0	chelator	0.8724	0	poor prediction
16672-87-0	chelator	0.8573	0	poor prediction
26016-98-8	chelator	0.8979	0.0833333	poor prediction
1984-15-2	chelator	0.9321	0	candidate alternative
6419-19-8	chelator	0.9718	0	candidate alternative
96-82-2	chelator	0.8475	0	candidate alternative
7414-83-7	chelator	0.9401	0	true positive
2809-21-4	chelator	0.9401	0	candidate alternative
2781-11-5	chelator	0.8387	0	poor prediction
60668-24-8	chelator	0.8402	0	poor prediction
56-40-6	chelator	0.8039	0	poor prediction
338-69-2	chelator	0.8065	0	poor prediction
1783-96-6	chelator	0.8555	0	candidate alternative
40391-99-9	chelator	0.8267	0	poor prediction
633-96-5	colorant	0.9976	0.0625	true positive
96-50-4	colorant	0.8542	0.0357143	true positive
2783-94-0	colorant	0.9999	0.03125	true positive
915-67-3	colorant	0.9989	0.0357143	true positive
1936-15-8	colorant	0.9974	0	true positive
91-68-9	colorant	0.8431	0.125	true positive
62-53-3	colorant	0.9122	0	true positive
371-40-4	colorant	0.96	0	candidate alternative
118-88-7	colorant	0.986	0	candidate alternative
106-40-1	colorant	0.983	0.125	candidate alternative
108-42-9	colorant	0.9951	0	true positive
106-47-8	colorant	0.9951	0.125	true positive
95-76-1	colorant	0.9684	0.0625	candidate alternative
626-43-7	colorant	0.9679	0.03125	candidate alternative
95-82-9	colorant	0.984	0.0625	true positive
554-00-7	colorant	0.9664	0	candidate alternative
5850-86-2	colorant	0.9861	0.0625	candidate alternative
95-51-2	colorant	0.9796	0	candidate alternative
3861-73-2	colorant	0.9883	0.166667	functional substitute
119-40-4	colorant	0.9906	0	true positive
116-81-4	colorant	0.9938	0.0625	true positive
88-51-7	colorant	0.9863	0	candidate alternative
130-17-6	colorant	0.9871	0.25	true positive
81-11-8	colorant	0.9772	0	candidate alternative
63133-82-4	colorant	0.9465	0	candidate alternative
6373-74-6	colorant	0.9733	0	candidate alternative
101-11-1	colorant	0.8941	0	candidate alternative
2353-45-9	colorant	0.9798	0.1875	true positive
3087-16-9	colorant	0.9851	0.166667	true positive
3520-42-1	colorant	0.9601	0.125	true positive
3844-45-9	colorant	0.9824	0.25	true positive
4680-78-8	colorant	0.9724	0	candidate alternative
129-17-9	colorant	0.9811	0.25	true positive
68238-36-8	colorant	0.9811	0	candidate alternative
67786-14-5	colorant	0.9609	0	candidate alternative
992-59-6	colorant	0.9282	0.3125	functional substitute
573-58-0	colorant	0.9375	0.178571	functional substitute
6258-06-6	colorant	0.995	0.0625	true positive
1937-37-7	colorant	0.9203	0.0625	candidate alternative
92-70-6	colorant	0.819	0.15625	true positive
95-69-2	colorant	0.989	0.0625	true positive
95-74-9	colorant	0.9907	0	candidate alternative
2835-95-2	colorant	0.8877	0.0625	true positive
123-30-8	colorant	0.934	0.340909	true positive
95-55-6	colorant	0.9058	0.3125	functional substitute
591-27-5	colorant	0.9427	0	true positive
2840-28-0	colorant	0.9624	0	candidate alternative
133-90-4	colorant	0.9574	0	candidate alternative
6358-07-2	colorant	0.9411	0.0625	candidate alternative
95-85-2	colorant	0.9662	0.1875	true positive
5930-28-9	colorant	0.9345	0.125	candidate alternative
96-91-3	colorant	0.9202	0	candidate alternative
119-34-6	colorant	0.9667	0.0625	candidate alternative
99-57-0	colorant	0.979	0.03125	true positive
121-88-0	colorant	0.9753	0.0625	true positive
22987-10-6	colorant	0.8213	0	true positive
122-80-5	colorant	0.9917	0	true positive
102-28-3	colorant	0.9963	0	true positive
6375-47-9	colorant	0.9927	0.03125	true positive
127-77-5	colorant	0.9486	0	candidate alternative
104-22-3	colorant	0.9318	0	candidate alternative
70693-59-3	colorant	0.9138	0.0625	true positive
547-44-4	colorant	0.9405	0.1875	functional substitute
144-80-9	colorant	0.9417	0	candidate alternative
3337-71-1	colorant	0.9603	0	candidate alternative
2835-99-6	colorant	0.8742	0.1875	functional substitute
127-71-9	colorant	0.9339	0	candidate alternative
2835-68-9	colorant	0.9512	0.0625	candidate alternative
88-68-6	colorant	0.9562	0	candidate alternative
19406-86-1	colorant	0.9481	0	candidate alternative
785-30-8	colorant	0.9216	0	candidate alternative
30391-89-0	colorant	0.8928	0	candidate alternative
17026-81-2	colorant	0.9364	0.0625	candidate alternative
80-74-0	colorant	0.9218	0	candidate alternative
95-84-1	colorant	0.8694	0.25	functional substitute
137-09-7	colorant	0.8421	0	candidate alternative
521-31-3	colorant	0.8139	0	poor prediction
104-94-9	colorant	0.9893	0.0625	true positive
536-90-3	colorant	0.9817	0.0625	candidate alternative
90-04-0	colorant	0.9813	0.03125	true positive
2735-04-8	colorant	0.985	0	true positive
621-33-0	colorant	0.9317	0.0625	candidate alternative
94-70-2	colorant	0.9263	0	candidate alternative
106-49-0	colorant	0.9061	0.03125	true positive
156-43-4	colorant	0.9538	0.0625	true positive
603-83-8	colorant	0.9879	0	candidate alternative
99-55-8	colorant	0.9875	0.0625	true positive
119-32-4	colorant	0.97	0.0625	candidate alternative
89-62-3	colorant	0.9608	0.0625	candidate alternative
578-46-1	colorant	0.9517	0	candidate alternative
87-60-5	colorant	0.9907	0	candidate alternative
99-52-5	colorant	0.9854	0	candidate alternative
95-79-4	colorant	0.9897	0	true positive
108-44-1	colorant	0.8838	0	candidate alternative
102-50-1	colorant	0.9722	0.0625	candidate alternative
535-87-5	colorant	0.9116	0	candidate alternative
619-17-0	colorant	0.9684	0.03125	candidate alternative
150-13-0	colorant	0.814	0	candidate alternative
118-92-3	colorant	0.8102	0	candidate alternative
6219-89-2	colorant	0.8521	0.125	candidate alternative
95-68-1	colorant	0.96	0.0625	true positive
95-53-4	colorant	0.8986	0	true positive
87-62-7	colorant	0.9523	0.03125	candidate alternative
95-64-7	colorant	0.9617	0.0625	candidate alternative
87-59-2	colorant	0.9474	0	candidate alternative
95-78-3	colorant	0.9438	0.0625	candidate alternative
137-17-7	colorant	0.9507	0	true positive
16452-01-0	colorant	0.9656	0.0625	candidate alternative
120-71-8	colorant	0.9709	0.03125	true positive
108-69-0	colorant	0.9413	0.0625	candidate alternative
52298-44-9	colorant	0.9265	0	candidate alternative
16712-64-4	colorant	0.8434	0	true positive
89-57-6	colorant	0.8074	0	candidate alternative
611-06-3	colorant	0.8147	0	candidate alternative
350-30-1	colorant	0.8536	0	candidate alternative
446-35-5	colorant	0.8338	0	candidate alternative
97-00-7	colorant	0.875	0.5625	true positive
70-34-8	colorant	0.8153	0.214286	functional substitute
605-71-0	colorant	0.8001	0	poor prediction
602-38-0	colorant	0.8001	0.125	poor prediction
88-73-3	colorant	0.8354	0	candidate alternative
121-73-3	colorant	0.8479	0	candidate alternative
100-00-5	colorant	0.8317	0	candidate alternative
102-36-3	colorant	0.837	0.125	candidate alternative
104-12-1	colorant	0.9247	0.0625	candidate alternative
89-98-5	colorant	0.807	0	true positive
83-38-5	colorant	0.809	0	true positive
120-82-1	colorant	0.8321	0	true positive
541-73-1	colorant	0.8355	0	candidate alternative
106-46-7	colorant	0.8886	0	true positive
2243-76-7	colorant	0.807	0.3125	functional substitute
129-16-8	colorant	0.8019	0	candidate alternative
16423-68-0	colorant	0.9287	0.0625	true positive
17372-87-1	colorant	0.9144	0.1875	true positive
27072-45-3	colorant	0.8585	0.125	candidate alternative
2321-07-5	colorant	0.9385	0.214286	true positive
99-54-7	colorant	0.8249	0.0625	candidate alternative
518-47-8	colorant	0.9133	0.1875	true positive
51-06-9	colorant	0.8227	0	candidate alternative
540-59-0	colorant	0.8656	0	true positive
156-59-2	colorant	0.8656	0	true positive
156-60-5	colorant	0.8656	0	candidate alternative
460-00-4	colorant	0.829	0.03125	candidate alternative
95-50-1	colorant	0.8994	0	true positive
614-39-1	colorant	0.8379	0	candidate alternative
3209-22-1	colorant	0.8251	0	candidate alternative
6378-25-2	colorant	0.8386	0	candidate alternative
121-60-8	colorant	0.8344	0	poor prediction
90-51-7	colorant	0.9996	0	true positive
483-84-1	colorant	0.9882	0	candidate alternative
2624-44-4	colorant	0.968	0	candidate alternative
98-37-3	colorant	0.99	0	true positive
135-76-2	colorant	0.9862	0	true positive
135-51-3	colorant	0.9984	0	true positive
87-02-5	colorant	0.9996	0.1875	true positive
88-21-1	colorant	0.9869	0	true positive
98-44-2	colorant	0.9926	0	true positive
515-74-2	colorant	0.9601	0.0625	candidate alternative
88-63-1	colorant	0.997	0	true positive
93-00-5	colorant	1	0	true positive
81-16-3	colorant	0.9999	0.125	true positive
88-44-8	colorant	0.986	0	candidate alternative
121-47-1	colorant	0.9869	0	true positive
15905-32-5	colorant	0.9462	0.03125	candidate alternative
5460-09-3	colorant	0.9985	0	true positive
615-28-1	colorant	0.8204	0.1875	functional substitute
93-05-0	colorant	0.8446	0.375	functional substitute
99-98-9	colorant	0.8942	0.375	functional substitute
2198-59-6	colorant	0.8213	0.0625	candidate alternative
6109-97-3	colorant	0.8333	0.125	candidate alternative
61702-44-1	colorant	0.8813	0.28125	functional substitute
20265-96-7	colorant	0.8919	0.09375	candidate alternative
88-23-3	colorant	0.9833	0	candidate alternative
934-32-7	colorant	0.8241	0.0625	candidate alternative
540-23-8	colorant	0.823	0.125	candidate alternative
636-21-5	colorant	0.823	0.0625	candidate alternative
142-04-1	colorant	0.8145	0.0625	candidate alternative
134-29-2	colorant	0.8402	0.0625	candidate alternative
20265-97-8	colorant	0.8417	0.125	candidate alternative
541-69-5	colorant	0.8204	0.0625	candidate alternative
638-03-9	colorant	0.823	0.0625	candidate alternative
6201-87-2	colorant	0.957	0	candidate alternative
15086-94-9	colorant	0.9737	0.1875	true positive
71-67-0	colorant	0.907	0	candidate alternative
831-59-4	colorant	0.9015	0	candidate alternative
120-18-3	colorant	0.8947	0	candidate alternative
27503-81-7	colorant	0.8593	0.09375	candidate alternative
89-02-1	colorant	0.9393	0	candidate alternative
98-66-8	colorant	0.8308	0	candidate alternative
121-03-9	colorant	0.8937	0	candidate alternative
52126-51-9	colorant	0.9578	0	candidate alternative
118-47-8	colorant	0.9766	0	true positive
88-53-9	colorant	0.9862	0	candidate alternative
119-17-5	colorant	0.9783	0	candidate alternative
89-36-1	colorant	0.9783	0	true positive
98-67-9	colorant	0.8821	0.0625	candidate alternative
825-90-1	colorant	0.8935	0	candidate alternative
149-45-1	colorant	0.9596	0	candidate alternative
1008-72-6	colorant	0.8462	0	true positive
89-08-7	colorant	0.9085	0	candidate alternative
6362-79-4	colorant	0.8892	0	candidate alternative
2870-32-8	colorant	0.8491	0	candidate alternative
27344-41-8	colorant	0.8598	0.1875	functional substitute
3709-43-1	colorant	0.9621	0	true positive
6359-82-6	colorant	0.9936	0.0625	true positive
1934-21-0	colorant	0.9848	0	true positive
15301-40-3	colorant	0.8654	0.166667	functional substitute
532-02-5	colorant	0.841	0	candidate alternative
547-91-1	colorant	0.9268	0	candidate alternative
131-08-8	colorant	0.9574	0	candidate alternative
130-37-0	colorant	0.935	0.25	functional substitute
68555-86-2	colorant	0.9548	0.0625	candidate alternative
6359-98-4	colorant	0.9812	0	true positive
6359-90-6	colorant	0.982	0.0625	candidate alternative
3965-55-7	colorant	0.8704	0	candidate alternative
8004-92-0	colorant	0.9619	0	true positive
130-14-3	colorant	0.8414	0	candidate alternative
125-31-5	colorant	0.8219	0.1875	functional substitute
34487-61-1	colorant	0.8161	0	candidate alternative
6459-94-5	colorant	0.966	0.09375	candidate alternative
25956-17-6	colorant	0.9932	0.0625	true positive
4548-53-2	colorant	0.9971	0	true positive
3564-09-8	colorant	0.9867	0	candidate alternative
81-55-0	colorant	0.9369	0.625	true positive
81-64-1	colorant	0.8047	0.0625	candidate alternative
1320-07-6	colorant	0.9821	0.0625	true positive
605-32-3	colorant	0.844	0.1875	functional substitute
72-48-0	colorant	0.913	0.1875	true positive
60200-06-8	colorant	0.8017	0	poor prediction
80-32-0	colorant	0.855	0.0357143	poor prediction
76-60-8	colorant	0.906	0.25	true positive
115-39-9	colorant	0.8372	0.1875	functional substitute
62625-32-5	colorant	0.8952	0.125	poor prediction
117-10-2	colorant	0.8473	0	candidate alternative
13473-26-2	colorant	0.9292	0.15625	true positive
3734-67-6	colorant	0.9956	0	true positive
2610-11-9	colorant	0.963	0.0625	candidate alternative
143-74-8	colorant	0.8119	0.0625	candidate alternative
80-09-1	colorant	0.8729	0.15625	true positive
135-19-3	colorant	0.8166	0.21875	true positive
4065-45-6	colorant	0.8357	0.0208333	candidate alternative
81-49-2	colorant	0.9332	0.0625	true positive
130-20-1	colorant	0.8646	0.0625	true positive
6625-46-3	colorant	0.9852	0.0625	candidate alternative
82-28-0	colorant	0.88	0.1875	functional substitute
117-79-3	colorant	0.9278	0.125	candidate alternative
482-89-3	colorant	0.8548	0.03125	true positive
483-20-5	colorant	0.9785	0.0833333	candidate alternative
860-22-0	colorant	0.9769	0	true positive
131-09-9	colorant	0.8285	0.0625	candidate alternative
84-65-1	colorant	0.8752	0	true positive
128-95-0	colorant	0.9045	0.0625	candidate alternative
526-08-9	colorant	0.9177	0	candidate alternative
90-41-5	colorant	0.9608	0	candidate alternative
57-67-0	colorant	0.9238	0	candidate alternative
60-09-3	colorant	0.9727	0.25	true positive
95-80-7	colorant	0.9568	0.125	true positive
823-40-5	colorant	0.9359	0.0625	candidate alternative
496-72-0	colorant	0.9357	0.25	functional substitute
2687-25-4	colorant	0.936	0.125	candidate alternative
101-77-9	colorant	0.9794	0.0625	true positive
29927-08-0	colorant	0.9449	0.125	candidate alternative
1477-42-5	colorant	0.9619	0.0625	candidate alternative
119-93-7	colorant	0.9276	0.15625	functional substitute
68298-46-4	colorant	0.922	0	candidate alternative
5464-79-9	colorant	0.9762	0.0625	candidate alternative
1747-60-0	colorant	0.9846	0.125	true positive
136-95-8	colorant	0.9763	0.0625	candidate alternative
94-45-1	colorant	0.9235	0.125	candidate alternative
6285-57-0	colorant	0.9814	0.125	true positive
2104-09-8	colorant	0.9483	0.125	candidate alternative
490-55-1	colorant	0.9533	0	candidate alternative
26049-71-8	colorant	0.9405	0.125	candidate alternative
132-32-1	colorant	0.8032	0.0625	candidate alternative
5834-17-3	colorant	0.896	0.125	poor prediction
139-65-1	colorant	0.955	0.1875	true positive
54029-45-7	colorant	0.9494	0.25	functional substitute
7411-49-6	colorant	0.864	0.125	candidate alternative
534-85-0	colorant	0.8857	0.1875	functional substitute
101-54-2	colorant	0.882	0.09375	candidate alternative
4273-98-7	colorant	0.9696	0	true positive
1131-18-6	colorant	0.9841	0	true positive
63-74-1	colorant	0.9077	0.0208333	candidate alternative
514-78-3	colorant	0.8028	0.166667	true positive
51-66-1	colorant	0.8633	0.0625	candidate alternative
89-33-8	colorant	0.8063	0.0625	true positive
89-25-8	colorant	0.8101	0.0833333	true positive
99-59-2	colorant	0.9976	0.0625	true positive
97-52-9	colorant	0.9967	0	true positive
96-96-8	colorant	0.9928	0	candidate alternative
100-01-6	colorant	0.988	0.0625	candidate alternative
99-09-2	colorant	0.9913	0	true positive
97-02-9	colorant	0.993	0	true positive
531-85-1	colorant	0.9282	0	candidate alternative
616-86-4	colorant	0.9647	0	true positive
134-32-7	colorant	0.9857	0.0625	true positive
88-74-4	colorant	0.9743	0	candidate alternative
92-67-1	colorant	0.9646	0.125	true positive
2243-62-1	colorant	0.9627	0.0625	candidate alternative
2243-61-0	colorant	0.9641	0.5	functional substitute
92-87-5	colorant	0.9843	0.09375	true positive
99-56-9	colorant	0.9615	0.125	candidate alternative
5131-58-8	colorant	0.9673	0.0625	candidate alternative
153-78-6	colorant	0.9184	0.1875	functional substitute
613-13-8	colorant	0.9207	0.3125	functional substitute
5467-78-7	colorant	0.9609	0	candidate alternative
91-59-8	colorant	0.989	0.09375	true positive
20325-40-0	colorant	0.966	0.1875	true positive
5307-14-2	colorant	0.9691	0.0625	candidate alternative
54150-69-5	colorant	0.9376	0	candidate alternative
64063-37-2	colorant	0.937	0	candidate alternative
367-25-9	colorant	0.9414	0	candidate alternative
98-16-8	colorant	0.9501	0	candidate alternative
569-61-9	colorant	0.8996	0.4375	functional substitute
632-99-5	colorant	0.9276	0.285714	true positive
84057-84-1	colorant	0.8154	0	poor prediction
538-41-0	colorant	0.9469	0.0625	candidate alternative
94-10-0	colorant	0.8931	0.333333	functional substitute
532-82-1	colorant	0.9148	0.1875	functional substitute
2693-46-1	colorant	0.8928	0.3125	functional substitute
97-56-3	colorant	0.9291	0.34375	true positive
89-63-4	colorant	0.9878	0.0625	candidate alternative
838-88-0	colorant	0.9513	0	true positive
101-14-4	colorant	0.9535	0.25	true positive
784-38-3	colorant	0.873	0	candidate alternative
963-14-4	colorant	0.8628	0	candidate alternative
80-35-3	colorant	0.8596	0	candidate alternative
59-40-5	colorant	0.809	0.03125	candidate alternative
152-47-6	colorant	0.8446	0	candidate alternative
127-69-5	colorant	0.9415	0.0333333	candidate alternative
723-46-6	colorant	0.927	0	candidate alternative
144-82-1	colorant	0.9316	0	candidate alternative
72-14-0	colorant	0.9113	0	candidate alternative
91-95-2	colorant	0.9154	0.0625	candidate alternative
54827-17-7	colorant	0.9071	0.0625	candidate alternative
19952-47-7	colorant	0.9865	0.1875	true positive
515-49-1	colorant	0.9084	0	candidate alternative
101-79-1	colorant	0.8488	0.125	candidate alternative
61-80-3	colorant	0.9662	0.0625	candidate alternative
39156-41-7	colorant	0.9282	0.375	true positive
3165-93-3	colorant	0.8997	0.0625	candidate alternative
21436-96-4	colorant	0.8977	0.0625	candidate alternative
612-82-8	colorant	0.9611	0.1875	true positive
106-50-3	colorant	0.9238	0.125	candidate alternative
108-45-2	colorant	0.9242	0.0625	candidate alternative
599-61-1	colorant	0.9083	0	candidate alternative
80-08-0	colorant	0.9115	0.0208333	candidate alternative
6264-66-0	colorant	0.8683	0.25	functional substitute
101-80-4	colorant	0.8717	0.03125	candidate alternative
119-90-4	colorant	0.9797	0	true positive
99-30-9	colorant	0.9143	0.15625	functional substitute
95-54-5	colorant	0.9566	0.0625	true positive
1817-73-8	colorant	0.9198	0.0625	candidate alternative
324-93-6	colorant	0.9702	0.125	candidate alternative
634-93-5	colorant	0.8933	0	candidate alternative
91-94-1	colorant	0.977	0.375	true positive
609-20-1	colorant	0.9492	0.09375	candidate alternative
612-83-9	colorant	0.9171	0.375	functional substitute
15721-02-5	colorant	0.8226	0.6875	functional substitute
5131-60-2	colorant	0.9565	0.125	candidate alternative
2683-43-4	colorant	0.91	0	candidate alternative
6358-64-1	colorant	0.9857	0.0625	true positive
95-83-0	colorant	0.957	0.1875	functional substitute
2996-92-1	crosslinker	0.9614	0	candidate alternative
5089-70-3	crosslinker	0.9471	0	candidate alternative
2530-87-2	crosslinker	0.9598	0	true positive
17689-77-9	crosslinker	0.991	0	true positive
4253-34-3	crosslinker	0.981	0	true positive
109-55-7	crosslinker	0.8374	0	poor prediction
919-31-3	crosslinker	0.9837	0	candidate alternative
2897-60-1	crosslinker	0.996	0	true positive
26116-12-1	crosslinker	0.8229	0	poor prediction
100-36-7	crosslinker	0.8716	0	candidate alternative
123-00-2	crosslinker	0.8185	0	poor prediction
3027-21-2	crosslinker	0.9363	0	candidate alternative
69852-45-5	crosslinker	0.8139	0	poor prediction
2530-83-8	crosslinker	0.9925	0.03125	true positive
780-69-8	crosslinker	0.9861	0	true positive
541-02-6	crosslinker	0.8777	0	candidate alternative
14814-09-6	crosslinker	0.9758	0	candidate alternative
82985-35-1	crosslinker	0.9238	0	candidate alternative
1760-24-3	crosslinker	0.9883	0	true positive
541-05-9	crosslinker	0.8036	0	candidate alternative
22984-54-9	crosslinker	0.9674	0	true positive
2554-06-5	crosslinker	0.9081	0	candidate alternative
2038-03-1	crosslinker	0.8493	0	candidate alternative
4420-74-0	crosslinker	0.9839	0	true positive
1000-05-1	crosslinker	0.8182	0	candidate alternative
682-01-9	crosslinker	0.9345	0	true positive
2761-24-2	crosslinker	0.9007	0	candidate alternative
17980-47-1	crosslinker	0.9246	0.0625	functional substitute
1067-25-0	crosslinker	0.9739	0	true positive
78-07-9	crosslinker	0.9415	0	candidate alternative
2031-67-6	crosslinker	0.9615	0	true positive
556-67-2	crosslinker	0.8564	0	candidate alternative
10563-29-8	crosslinker	0.8864	0.0625	poor prediction
78-90-0	crosslinker	0.8573	0	candidate alternative
929-59-9	crosslinker	0.9448	0	true positive
21282-97-3	crosslinker	0.8917	0	true positive
123-81-9	crosslinker	0.8855	0	true positive
2358-84-1	crosslinker	0.8517	0	candidate alternative
109-17-1	crosslinker	0.9092	0	true positive
109-16-0	crosslinker	0.9164	0	true positive
3775-90-4	crosslinker	0.8895	0	true positive
143-22-6	crosslinker	0.8417	0	true positive
105-16-8	crosslinker	0.8326	0	candidate alternative
3290-92-4	crosslinker	0.809	0.03125	true positive
2855-13-2	crosslinker	0.8682	0	true positive
80-52-4	crosslinker	0.8279	0.0625	functional substitute
80-08-0	crosslinker	0.8793	0.0208333	true positive
599-61-1	crosslinker	0.8846	0	true positive
919-30-2	crosslinker	0.9981	0	true positive
2867-47-2	crosslinker	0.8811	0	true positive
140-31-8	crosslinker	0.915	0	true positive
143-23-7	crosslinker	0.9118	0	true positive
15520-10-2	crosslinker	0.9021	0	true positive
4246-51-9	crosslinker	0.9332	0	true positive
138-92-1	crosslinker	0.8846	0	candidate alternative
56-18-8	crosslinker	0.9167	0.0625	functional substitute
111-40-0	crosslinker	0.9658	0.0454545	true positive
112-24-3	crosslinker	0.9129	0	true positive
2579-20-6	crosslinker	0.8188	0	candidate alternative
124-09-4	crosslinker	0.8668	0	candidate alternative
694-83-7	crosslinker	0.88	0	true positive
2752-17-2	crosslinker	0.899	0.0625	functional substitute
107-15-3	crosslinker	0.9009	0.0714286	true positive
89-32-7	crosslinker	0.8212	0	true positive
57116-45-7	crosslinker	0.8417	0	true positive
33007-83-9	crosslinker	0.8958	0	true positive
7575-23-7	crosslinker	0.8974	0	true positive
110-85-0	crosslinker	0.8023	0.0227273	true positive
2469-55-8	crosslinker	0.959	0.0625	functional substitute
1071-93-8	crosslinker	0.8287	0	true positive
2943-75-1	crosslinker	0.8145	0	candidate alternative
2873-97-4	crosslinker	0.8202	0	true positive
84962-98-1	crosslinker	0.84	0	poor prediction
122-20-3	crosslinker	0.8153	0.03125	true positive
111-41-1	crosslinker	0.8059	0	candidate alternative
77-99-6	crosslinker	0.8138	0	true positive
552-30-7	crosslinker	0.8145	0	true positive
27955-94-8	crosslinker	0.8478	0.3125	true positive
2421-28-5	crosslinker	0.8005	0	true positive
13680-35-8	crosslinker	0.9318	0.5	true positive
3068-76-6	crosslinker	0.9809	0	true positive
144-79-6	crosslinker	0.9555	0	true positive
80-10-4	crosslinker	0.9592	0	true positive
40372-72-3	crosslinker	0.9215	0	true positive
26115-70-8	crosslinker	0.9137	0	true positive
80-05-7	crosslinker	0.8072	0.375	true positive
17945-05-0	crosslinker	0.9742	0	candidate alternative
1112-39-6	crosslinker	0.828	0	candidate alternative
23432-62-4	crosslinker	0.9635	0	candidate alternative
1185-55-3	crosslinker	0.9677	0	true positive
681-84-5	crosslinker	0.9299	0	true positive
78-10-4	crosslinker	0.9576	0	true positive
15332-99-7	crosslinker	0.9358	0	true positive
1009-93-4	crosslinker	0.8456	0	poor prediction
4130-08-9	crosslinker	0.9909	0	true positive
2768-02-7	crosslinker	0.9758	0	true positive
1067-53-4	crosslinker	0.9643	0	candidate alternative
2530-85-0	crosslinker	0.9904	0	true positive
7351-61-3	crosslinker	0.8399	0	candidate alternative
23779-32-0	crosslinker	0.9818	0	true positive
78-08-0	crosslinker	0.9768	0	true positive
541-02-6	emollient	0.8942	0	true positive
142-18-7	emollient	0.8945	0.0357143	true positive
22047-49-0	emollient	0.9732	0	candidate alternative
79-81-2	emollient	0.8575	0	candidate alternative
10595-72-9	emollient	0.9055	0	candidate alternative
589-68-4	emollient	0.9377	0	true positive
141-23-1	emollient	0.9829	0	true positive
142-91-6	emollient	0.9871	0	candidate alternative
1338-43-8	emollient	0.8367	0	candidate alternative
141-24-2	emollient	0.9683	0	true positive
628-97-7	emollient	0.98	0.0625	functional substitute
112-39-0	emollient	0.9455	0.0625	functional substitute
124-06-1	emollient	0.9244	0	candidate alternative
124-10-7	emollient	0.9138	0	true positive
110-27-0	emollient	0.9593	0.0208333	functional substitute
556-67-2	emollient	0.8242	0	true positive
123-94-4	emollient	0.9443	0	candidate alternative
103-23-1	emollient	0.884	0.03125	functional substitute
33189-72-9	emollient	0.8511	0	candidate alternative
2432-87-3	emollient	0.9775	0	candidate alternative
3319-31-1	emollient	0.8921	0.03125	true positive
111-62-6	emollient	0.9596	0	candidate alternative
112-62-9	emollient	0.9244	0.0625	functional substitute
1191-41-9	emollient	0.9351	0.1875	functional substitute
112-63-0	emollient	0.8799	0.15625	functional substitute
20711-10-8	emollient	0.8511	0	candidate alternative
142-16-5	emollient	0.9605	0.03125	true positive
41395-83-9	emollient	0.974	0	candidate alternative
109-31-9	emollient	0.9719	0	candidate alternative
538-23-8	emollient	0.9547	0	true positive
109-43-3	emollient	0.9381	0	candidate alternative
2917-73-9	emollient	0.874	0	candidate alternative
110-33-8	emollient	0.916	0	true positive
142-77-8	emollient	0.974	0	candidate alternative
122-62-3	emollient	0.9559	0	candidate alternative
103-24-2	emollient	0.9568	0.03125	functional substitute
141-19-5	emollient	0.8146	0	candidate alternative
82469-79-2	emollient	0.9213	0	candidate alternative
555-44-2	emollient	0.9905	0	true positive
111-60-4	emollient	0.9702	0.0833333	true positive
111-60-4	emulsifier	0.9063	0.0833333	candidate alternative
112-92-5	emulsifier	0.8326	0	poor prediction
123-94-4	emulsifier	0.9065	0	poor prediction
661-19-8	emulsifier	0.8754	0	poor prediction
544-62-7	emulsifier	0.8938	0.0625	poor prediction
137-66-6	emulsifier	0.804	0	poor prediction
26266-57-9	emulsifier	0.8256	0	candidate alternative
22047-49-0	emulsifier	0.8063	0	poor prediction
553-08-2	emulsifier	0.8007	0.1875	poor prediction
25507-04-4	emulsifier	0.8513	0	poor prediction
124-03-8	emulsifier	0.8118	0.6875	functional substitute
112-03-8	emulsifier	0.8593	0.6875	functional substitute
24602-86-6	emulsifier	0.8195	0	poor prediction
544-31-0	emulsifier	0.9016	0	candidate alternative
3179-80-4	emulsifier	0.8226	0.625	functional substitute
1120-04-3	emulsifier	0.8504	0.1875	poor prediction
5116-94-9	emulsifier	0.8447	0.25	functional substitute
3055-99-0	emulsifier	0.8923	0.3125	true positive
57-11-4	emulsifier	0.8209	0.0833333	candidate alternative
63-89-8	emulsifier	0.8373	0	poor prediction
18656-38-7	emulsifier	0.8068	0	poor prediction
102-87-4	emulsifier	0.8294	0	candidate alternative
124-28-7	emulsifier	0.947	0	true positive
112-69-6	emulsifier	0.9151	0	true positive
27668-52-6	emulsifier	0.8581	0.166667	poor prediction
666-99-9	emulsifier	0.837	0.25	poor prediction
18924-66-8	emulsifier	0.8817	0.5	functional substitute
143-27-1	emulsion stabilizer	0.8191	0	poor prediction
3825-26-1	emulsion stabilizer	0.8201	0.0625	functional substitute
1120-01-0	emulsion stabilizer	0.832	0	poor prediction
1191-50-0	emulsion stabilizer	0.8054	0.0625	poor prediction
1120-04-3	emulsion stabilizer	0.8622	0.1875	poor prediction
18263-25-7	emulsion stabilizer	0.9005	0.25	functional substitute
3055-99-0	emulsion stabilizer	0.8554	0.3125	poor prediction
4536-30-5	emulsion stabilizer	0.8754	0.1	functional substitute
4568-28-9	emulsion stabilizer	0.9437	0.1875	functional substitute
57-11-4	emulsion stabilizer	0.9437	0.0833333	functional substitute
124-28-7	emulsion stabilizer	0.8524	0	poor prediction
112-69-6	emulsion stabilizer	0.8211	0	poor prediction
666-99-9	emulsion stabilizer	0.94	0.25	functional substitute
106-14-9	emulsion stabilizer	0.8585	0.0625	functional substitute
18924-66-8	emulsion stabilizer	0.889	0.5	functional substitute
1541-67-9	emulsion stabilizer	0.8305	0.5625	functional substitute
544-31-0	emulsion stabilizer	0.8852	0	poor prediction
120-40-1	emulsion stabilizer	0.8498	0.0833333	poor prediction
1119-97-7	emulsion stabilizer	0.8163	0.5	poor prediction
4574-04-3	emulsion stabilizer	0.8163	0.375	poor prediction
112-03-8	emulsion stabilizer	0.8729	0.6875	poor prediction
57-09-0	emulsion stabilizer	0.8429	0.46875	poor prediction
307-24-4	emulsion stabilizer	0.807	0	candidate alternative
375-85-9	emulsion stabilizer	0.8201	0	candidate alternative
335-67-1	emulsion stabilizer	0.8201	0.0625	functional substitute
2058-94-8	emulsion stabilizer	0.8195	0.0625	functional substitute
112-30-1	emulsion stabilizer	0.8136	0	candidate alternative
112-42-5	emulsion stabilizer	0.8136	0	candidate alternative
629-78-7	emulsion stabilizer	0.8684	0.0625	functional substitute
544-76-3	emulsion stabilizer	0.8684	0.0625	functional substitute
629-62-9	emulsion stabilizer	0.8411	0	candidate alternative
629-59-4	emulsion stabilizer	0.8411	0	candidate alternative
124-25-4	emulsion stabilizer	0.8287	0.0625	functional substitute
7320-37-8	emulsion stabilizer	0.8223	0	poor prediction
112-88-9	emulsion stabilizer	0.8077	0	poor prediction
355-42-0	emulsion stabilizer	0.8379	0	candidate alternative
124-03-8	emulsion stabilizer	0.8453	0.6875	poor prediction
678-26-2	emulsion stabilizer	0.8226	0	candidate alternative
754-91-6	emulsion stabilizer	0.8252	0.1875	functional substitute
4151-50-2	emulsion stabilizer	0.8059	0	candidate alternative
678-39-7	emulsion stabilizer	0.842	0	candidate alternative
647-42-7	emulsion stabilizer	0.8423	0	candidate alternative
2795-39-3	emulsion stabilizer	0.8186	0	candidate alternative
1763-23-1	emulsion stabilizer	0.8186	0.0625	functional substitute
3871-99-6	emulsion stabilizer	0.8192	0	candidate alternative
29420-49-3	emulsion stabilizer	0.8047	0	candidate alternative
335-76-2	emulsion stabilizer	0.8195	0.0625	functional substitute
375-95-1	emulsion stabilizer	0.8195	0.0625	functional substitute
423-55-2	emulsion stabilizer	0.8373	0	candidate alternative
112-02-7	emulsion stabilizer	0.8429	0.375	poor prediction
123-03-5	emulsion stabilizer	0.8155	0.625	poor prediction
544-63-8	emulsion stabilizer	0.9017	0	candidate alternative
36653-82-4	emulsion stabilizer	0.9737	0	candidate alternative
112-72-1	emulsion stabilizer	0.9641	0.03125	true positive
112-53-8	emulsion stabilizer	0.9027	0	candidate alternative
112-70-9	emulsion stabilizer	0.9027	0.03125	true positive
1002-84-2	emulsion stabilizer	0.9017	0.0625	functional substitute
57-10-3	emulsion stabilizer	0.9247	0.0625	functional substitute
112-92-5	emulsion stabilizer	0.9869	0	candidate alternative
638-53-9	emulsion stabilizer	0.813	0.125	functional substitute
32360-05-7	emulsion stabilizer	0.8027	0	candidate alternative
7047-84-9	emulsion stabilizer	0.9613	0.0833333	true positive
27668-52-6	emulsion stabilizer	0.84	0.166667	poor prediction
83-46-5	emulsion stabilizer	0.8642	0	true positive
57-88-5	emulsion stabilizer	0.8811	0	true positive
140-72-7	emulsion stabilizer	0.8155	0.5625	poor prediction
143-07-7	emulsion stabilizer	0.813	0.0625	functional substitute
638-65-3	emulsion stabilizer	0.8928	0.0625	functional substitute
629-76-5	emulsion stabilizer	0.9641	0	true positive
112-82-3	emulsion stabilizer	0.8685	0	poor prediction
77-58-7	emulsion stabilizer	0.82	0	poor prediction
22047-49-0	emulsion stabilizer	0.8028	0	candidate alternative
589-68-4	emulsion stabilizer	0.826	0	candidate alternative
544-62-7	emulsion stabilizer	0.9644	0.0625	true positive
661-19-8	emulsion stabilizer	0.9869	0	true positive
3386-33-2	emulsion stabilizer	0.8963	0	poor prediction
111-60-4	emulsion stabilizer	0.8804	0.0833333	functional substitute
505-52-2	emulsion stabilizer	0.813	0.03125	candidate alternative
123-94-4	emulsion stabilizer	0.8752	0	candidate alternative
112-71-0	emulsion stabilizer	0.8428	0	poor prediction
2425-54-9	emulsion stabilizer	0.8425	0	poor prediction
544-77-4	emulsion stabilizer	0.8685	0	poor prediction
4860-03-1	emulsion stabilizer	0.8682	0	poor prediction
3508-00-7	emulsion stabilizer	0.8685	0	poor prediction
629-72-1	emulsion stabilizer	0.8428	0	poor prediction
112-15-2	film forming agent	0.9437	0	true positive
111-15-9	film forming agent	0.8862	0	true positive
112-34-5	film forming agent	0.9203	0	true positive
923-26-2	film forming agent	0.8543	0	candidate alternative
868-77-9	film forming agent	0.9332	0	true positive
2358-84-1	film forming agent	0.8468	0	candidate alternative
21282-97-3	film forming agent	0.8019	0	poor prediction
55934-93-5	film forming agent	0.8117	0	true positive
112-59-4	film forming agent	0.8307	0	candidate alternative
96-05-9	film forming agent	0.8055	0.03125	functional substitute
124-17-4	film forming agent	0.9447	0	true positive
112-07-2	film forming agent	0.9379	0	true positive
18268-70-7	film forming agent	0.8256	0	candidate alternative
94-28-0	film forming agent	0.8594	0	true positive
141-17-3	film forming agent	0.8006	0.03125	functional substitute
1559-35-9	film forming agent	0.8232	0	candidate alternative
29387-86-8	film forming agent	0.8524	0	candidate alternative
111-90-0	film forming agent	0.8436	0	true positive
6881-94-3	film forming agent	0.8114	0	candidate alternative
5131-66-8	film forming agent	0.9158	0	true positive
29911-27-1	film forming agent	0.92	0	true positive
111-76-2	film forming agent	0.9215	0	true positive
4655-34-9	film forming agent	0.8803	0	candidate alternative
80-39-7	film forming agent	0.8128	0	true positive
29911-28-2	film forming agent	0.9263	0	true positive
111-21-7	film forming agent	0.8535	0	candidate alternative
97-88-1	film forming agent	0.9293	0.0625	true positive
142-09-6	film forming agent	0.8108	0	candidate alternative
688-84-6	film forming agent	0.8932	0	true positive
7534-94-3	film forming agent	0.8622	0.03125	true positive
112-25-4	film forming agent	0.887	0	true positive
2455-24-5	film forming agent	0.9242	0	true positive
1189-08-8	film forming agent	0.8192	0	candidate alternative
2274-11-5	film forming agent	0.8129	0.375	functional substitute
2370-63-0	film forming agent	0.9562	0	candidate alternative
97-90-5	film forming agent	0.8566	0	candidate alternative
4074-88-8	film forming agent	0.8664	0.5	functional substitute
106-91-2	film forming agent	0.8961	0	poor prediction
7085-85-0	film forming agent	0.9372	0.03125	true positive
1569-01-3	film forming agent	0.8422	0.0625	true positive
2082-81-7	film forming agent	0.8622	0	true positive
7328-17-8	film forming agent	0.8956	0	candidate alternative
97-86-9	film forming agent	0.9409	0	true positive
719-32-4	flame retardant	0.9332	0	candidate alternative
133-07-3	flame retardant	0.8441	0.375	functional substitute
321-55-1	flame retardant	0.8487	0	poor prediction
27314-13-2	flame retardant	0.8022	0.09375	poor prediction
2164-17-2	flame retardant	0.8015	0	poor prediction
98730-04-2	flame retardant	0.8334	0.1875	poor prediction
61213-25-0	flame retardant	0.8678	0.125	poor prediction
142459-58-3	flame retardant	0.8951	0.125	poor prediction
369-77-7	flame retardant	0.8573	0.375	poor prediction
21440-97-1	flame retardant	0.8379	0	candidate alternative
363-17-7	flame retardant	0.8092	0.0625	poor prediction
50594-66-6	flame retardant	0.8449	0.125	poor prediction
103055-07-8	flame retardant	0.8962	0.03125	poor prediction
86479-06-3	flame retardant	0.8952	0.1875	poor prediction
116714-46-6	flame retardant	0.8728	0	poor prediction
64628-44-0	flame retardant	0.8194	0.0625	poor prediction
101463-69-8	flame retardant	0.8615	0.25	poor prediction
173584-44-6	flame retardant	0.8053	0.25	poor prediction
154598-52-4	flame retardant	0.8365	0.375	poor prediction
3736-81-0	flame retardant	0.8564	0.0625	poor prediction
15362-40-0	flame retardant	0.8851	0.3125	functional substitute
2310-17-0	flame retardant	0.8037	0.1875	poor prediction
35575-96-3	flame retardant	0.8257	0.1875	poor prediction
69806-34-4	flame retardant	0.8161	0.1875	poor prediction
2425-06-1	flame retardant	0.8295	0.5	poor prediction
115-28-6	flame retardant	0.8848	0	candidate alternative
3825-26-1	flame retardant	0.8335	0.0625	candidate alternative
85509-19-9	flame retardant	0.8776	0.28125	poor prediction
85-36-9	flame retardant	0.8184	0	poor prediction
2955-38-6	flame retardant	0.807	0.142857	poor prediction
22316-47-8	flame retardant	0.8249	0	candidate alternative
23950-58-5	flame retardant	0.8384	0.03125	candidate alternative
83121-18-0	flame retardant	0.8977	0	candidate alternative
35367-38-5	flame retardant	0.8376	0.0625	candidate alternative
101-20-2	flame retardant	0.8739	0.416667	functional substitute
88-82-4	flame retardant	0.927	0.125	candidate alternative
36734-19-7	flame retardant	0.9301	0.09375	true positive
4891-15-0	flame retardant	0.8237	0.25	poor prediction
53786-46-2	flame retardant	0.8104	0	poor prediction
32809-16-8	flame retardant	0.8094	0.125	poor prediction
10311-84-9	flame retardant	0.841	0.25	functional substitute
732-11-6	flame retardant	0.8583	0	true positive
86811-58-7	flame retardant	0.8302	0	poor prediction
71422-67-8	flame retardant	0.8382	0.1875	poor prediction
83164-33-4	flame retardant	0.8275	0	poor prediction
64902-72-3	flame retardant	0.8059	0.0625	poor prediction
3278-89-5	flame retardant	0.9621	0	true positive
35554-44-0	flame retardant	0.8058	0.375	poor prediction
470-90-6	flame retardant	0.9115	0.25	poor prediction
961-11-5	flame retardant	0.9355	0.3125	poor prediction
22248-79-9	flame retardant	0.9355	0.3125	poor prediction
57018-04-9	flame retardant	0.8387	0.125	poor prediction
41424-36-6	flame retardant	0.8726	0	candidate alternative
393-75-9	flame retardant	0.8282	0.0625	poor prediction
29091-09-6	flame retardant	0.9049	0.4375	poor prediction
42874-03-3	flame retardant	0.9136	0.09375	poor prediction
15457-05-3	flame retardant	0.8695	0.25	poor prediction
112281-77-3	flame retardant	0.9264	0.375	poor prediction
88485-37-4	flame retardant	0.8132	0	poor prediction
68-36-0	flame retardant	0.8763	0.0625	candidate alternative
13014-18-1	flame retardant	0.8595	0	candidate alternative
13014-24-9	flame retardant	0.8641	0.0625	candidate alternative
523-27-3	flame retardant	0.8978	0.125	poor prediction
5436-43-1	flame retardant	0.9966	0.125	true positive
60348-60-9	flame retardant	0.9977	0	true positive
17824-83-8	flame retardant	0.8327	0.375	functional substitute
143-50-0	flame retardant	0.8478	0.71875	poor prediction
6378-25-2	flame retardant	0.8971	0	candidate alternative
116255-48-2	flame retardant	0.9372	0.1875	functional substitute
72178-02-0	flame retardant	0.8074	0.09375	poor prediction
82097-50-5	flame retardant	0.8234	0	poor prediction
87-10-5	flame retardant	0.818	0.416667	functional substitute
1154-59-2	flame retardant	0.8502	0.4375	functional substitute
4776-06-1	flame retardant	0.8257	0.464286	poor prediction
22662-39-1	flame retardant	0.8257	0.125	candidate alternative
50-31-7	flame retardant	0.8743	0.0625	candidate alternative
152-53-4	flame retardant	0.8005	0.166667	poor prediction
60207-31-0	flame retardant	0.903	0	candidate alternative
31036-80-3	flame retardant	0.8749	0	candidate alternative
74115-24-5	flame retardant	0.8739	0.03125	poor prediction
4462-55-9	flame retardant	0.9045	0	poor prediction
101-27-9	flame retardant	0.9109	0.3125	functional substitute
330-55-2	flame retardant	0.8781	0.125	candidate alternative
13360-45-7	flame retardant	0.9002	0.125	candidate alternative
116-29-0	flame retardant	0.9737	0.1875	functional substitute
80-33-1	flame retardant	0.8777	0.0625	poor prediction
80-07-9	flame retardant	0.8926	0.1875	functional substitute
133855-98-8	flame retardant	0.8627	0.1875	poor prediction
119446-68-3	flame retardant	0.8802	0.375	functional substitute
1861-32-1	flame retardant	0.9348	0.03125	candidate alternative
2385-85-5	flame retardant	0.9521	0	poor prediction
1024-57-3	flame retardant	0.9274	0.0625	candidate alternative
52756-22-6	flame retardant	0.8431	0.3125	poor prediction
19666-30-9	flame retardant	0.8777	0.25	poor prediction
128639-02-1	flame retardant	0.828	0	poor prediction
67747-09-5	flame retardant	0.8472	0.28125	poor prediction
68359-37-5	flame retardant	0.8193	0.0625	candidate alternative
118712-89-3	flame retardant	0.8481	0	candidate alternative
91465-08-6	flame retardant	0.8147	0	poor prediction
79538-32-2	flame retardant	0.8486	0	poor prediction
80-06-8	flame retardant	0.8074	0.25	functional substitute
140-57-8	flame retardant	0.8034	0	poor prediction
153233-91-1	flame retardant	0.8688	0.25	functional substitute
66246-88-6	flame retardant	0.8288	0.25	functional substitute
66230-04-4	flame retardant	0.882	0	candidate alternative
51630-58-1	flame retardant	0.882	0.0625	true positive
70124-77-5	flame retardant	0.829	0	candidate alternative
14929-11-4	flame retardant	0.8021	0	poor prediction
6928-67-2	flame retardant	0.9161	0.0625	candidate alternative
51338-27-3	flame retardant	0.9087	0	candidate alternative
299-86-5	flame retardant	0.8254	0.125	poor prediction
66441-23-4	flame retardant	0.8129	0.125	poor prediction
71283-80-2	flame retardant	0.8129	0.125	poor prediction
129630-19-9	flame retardant	0.8567	0.0625	poor prediction
42576-02-3	flame retardant	0.9081	0.3125	functional substitute
103112-35-2	flame retardant	0.9265	0.3125	poor prediction
1085-98-9	flame retardant	0.8793	0.5	poor prediction
2921-88-2	flame retardant	0.9567	0.0625	true positive
5598-13-0	flame retardant	0.9678	0.1875	true positive
5598-15-2	flame retardant	0.9477	0.3125	functional substitute
2227-13-6	flame retardant	0.9663	0.03125	candidate alternative
1825-19-0	flame retardant	0.9583	0.0625	candidate alternative
2275-14-1	flame retardant	0.8559	0.0625	poor prediction
60207-93-4	flame retardant	0.9026	0.125	candidate alternative
60207-90-1	flame retardant	0.9174	0.28125	true positive
35065-27-1	flame retardant	0.982	0	candidate alternative
41198-08-7	flame retardant	0.9165	0.125	poor prediction
34643-46-4	flame retardant	0.8813	0.125	poor prediction
3778-73-2	flame retardant	0.813	0.0208333	candidate alternative
140-08-9	flame retardant	0.843	0.03125	candidate alternative
3194-55-6	flame retardant	0.9799	0.1875	true positive
3322-93-8	flame retardant	0.8058	0.0625	candidate alternative
105512-06-9	flame retardant	0.8175	0	poor prediction
4938-72-1	flame retardant	0.8792	0	candidate alternative
117718-60-2	flame retardant	0.8051	0	poor prediction
97886-45-8	flame retardant	0.819	0	poor prediction
115-86-6	flame retardant	0.8967	0.0625	true positive
513-92-8	flame retardant	0.845	0.375	poor prediction
319-84-6	flame retardant	0.9458	0	candidate alternative
58-89-9	flame retardant	0.9458	0	true positive
319-85-7	flame retardant	0.9458	0.0625	candidate alternative
608-73-1	flame retardant	0.9458	0.0454545	candidate alternative
75-95-6	flame retardant	0.8595	0.1875	poor prediction
54593-83-8	flame retardant	0.8961	0.0625	poor prediction
3737-41-5	flame retardant	0.8132	0.6875	poor prediction
1929-82-4	flame retardant	0.8294	0	candidate alternative
69045-78-9	flame retardant	0.8294	0	candidate alternative
69045-83-6	flame retardant	0.8705	0	candidate alternative
1134-04-9	flame retardant	0.9515	0.375	functional substitute
1715-40-8	flame retardant	0.9731	0.0625	candidate alternative
57-74-9	flame retardant	0.9863	0.5625	functional substitute
465-73-6	flame retardant	0.934	0	candidate alternative
76-44-8	flame retardant	0.9464	0.21875	true positive
959-98-8	flame retardant	0.9703	0.1875	functional substitute
115-29-7	flame retardant	0.9703	0.4375	true positive
1031-07-8	flame retardant	0.9626	0.25	functional substitute
35948-25-5	flame retardant	0.8149	0	true positive
115-27-5	flame retardant	0.9356	0	candidate alternative
298-00-0	flame retardant	0.8028	0.0625	true positive
1836-75-5	flame retardant	0.9526	0.0625	candidate alternative
546-71-4	flame retardant	0.8194	0.125	candidate alternative
13674-84-5	flame retardant	0.9907	0	true positive
6145-73-9	flame retardant	0.9888	0	true positive
115-96-8	flame retardant	0.9477	0	true positive
13674-87-8	flame retardant	0.9935	0.1875	true positive
126-72-7	flame retardant	0.977	0.28125	functional substitute
300-76-5	flame retardant	0.9148	0.21875	functional substitute
52-68-6	flame retardant	0.9066	0.0625	poor prediction
95-94-3	flame retardant	0.8217	0.03125	candidate alternative
634-66-2	flame retardant	0.8238	0	candidate alternative
608-93-5	flame retardant	0.8778	0	candidate alternative
615-54-3	flame retardant	0.8436	0	candidate alternative
20098-48-0	flame retardant	0.8412	0	candidate alternative
17700-09-3	flame retardant	0.838	0	candidate alternative
89-69-0	flame retardant	0.8495	0	candidate alternative
18708-70-8	flame retardant	0.8173	0	candidate alternative
879-39-0	flame retardant	0.9378	0	candidate alternative
117-18-0	flame retardant	0.9341	0	candidate alternative
82-68-8	flame retardant	0.9607	0.03125	candidate alternative
2463-84-5	flame retardant	0.8475	0	candidate alternative
87-82-1	flame retardant	0.9914	0.0625	candidate alternative
13473-26-2	flame retardant	0.8261	0.15625	poor prediction
1897-45-6	flame retardant	0.9119	0.59375	functional substitute
1018-71-9	flame retardant	0.8537	0.416667	poor prediction
28911-01-5	flame retardant	0.8464	0	poor prediction
57801-81-7	flame retardant	0.8316	0.166667	poor prediction
1746-01-6	flame retardant	0.9158	0.0625	poor prediction
124495-18-7	flame retardant	0.9132	0.1875	poor prediction
117-08-8	flame retardant	0.9442	0	candidate alternative
632-79-1	flame retardant	0.9668	0	true positive
17780-75-5	flame retardant	0.8007	0.125	poor prediction
23593-75-1	flame retardant	0.8191	0.46875	poor prediction
101-05-3	flame retardant	0.8191	0	poor prediction
79-95-8	flame retardant	0.8978	0.25	functional substitute
79-94-7	flame retardant	0.9359	0.333333	true positive
70-30-4	flame retardant	0.8847	0.5625	functional substitute
4162-45-2	flame retardant	0.894	0.5	functional substitute
25327-89-3	flame retardant	0.9567	0	true positive
21850-44-2	flame retardant	0.989	0	true positive
72-55-9	flame retardant	0.8627	0.0625	poor prediction
122453-73-0	flame retardant	0.8803	0.375	poor prediction
69806-40-2	flame retardant	0.8527	0.125	poor prediction
69-27-2	flame retardant	0.8657	0	candidate alternative
22916-47-8	flame retardant	0.8086	0	poor prediction
24169-02-6	flame retardant	0.807	0.604167	poor prediction
131341-86-1	flame retardant	0.8186	0.375	poor prediction
21609-90-5	flame retardant	0.9677	0.125	candidate alternative
60-51-5	flame retardant	0.8193	0	true positive
2781-11-5	flame retardant	0.8003	0	true positive
13181-17-4	flame retardant	0.8599	0.25	functional substitute
844-26-8	flame retardant	0.8606	0.125	candidate alternative
6385-58-6	flame retardant	0.8366	0.625	functional substitute
97-18-7	flame retardant	0.8842	0.541667	functional substitute
15599-52-7	flame retardant	0.8532	0.25	functional substitute
87-86-5	flame retardant	0.9296	0.3125	functional substitute
77501-90-7	flame retardant	0.8133	0.125	poor prediction
608-71-9	flame retardant	0.9622	0.3125	functional substitute
3380-34-5	flame retardant	0.8922	0.3125	functional substitute
118-79-6	flame retardant	0.9438	0.125	true positive
136-32-3	flame retardant	0.8348	0.1875	functional substitute
58-90-2	flame retardant	0.8857	0.25	functional substitute
4901-51-3	flame retardant	0.8915	0.4375	functional substitute
935-95-5	flame retardant	0.8859	0.3125	functional substitute
120068-37-3	flame retardant	0.8335	0.28125	poor prediction
79622-59-6	flame retardant	0.8174	0.8125	poor prediction
62924-70-3	flame retardant	0.812	0.3125	poor prediction
305-85-1	flame retardant	0.9204	0.166667	functional substitute
77501-63-4	flame retardant	0.849	0.15625	poor prediction
1113-02-6	flame retardant	0.8356	0	true positive
72-43-5	flame retardant	0.9431	0.25	true positive
10469-09-7	flame retardant	0.8412	0.0625	candidate alternative
2759-71-9	flame retardant	0.838	0.25	poor prediction
116-52-9	flame retardant	0.8181	0	candidate alternative
541-79-7	flame retardant	0.826	0	candidate alternative
98967-40-9	flame retardant	0.8578	0	poor prediction
145701-23-1	flame retardant	0.8723	0	poor prediction
145701-21-9	flame retardant	0.8759	0.0625	poor prediction
122836-35-5	flame retardant	0.8887	0	poor prediction
120-97-8	flame retardant	0.8689	0	poor prediction
2104-96-3	flame retardant	0.9573	0.1875	functional substitute
299-84-3	flame retardant	0.9661	0.0227273	candidate alternative
18181-70-9	flame retardant	0.9805	0.3125	functional substitute
118-74-1	flame retardant	0.9733	0	true positive
777-11-7	flame retardant	0.9824	0.333333	functional substitute
1825-21-4	flame retardant	0.9514	0	candidate alternative
2050-47-7	flame retardant	0.9355	0	candidate alternative
4824-78-6	flame retardant	0.9662	0.0625	candidate alternative
97-17-6	flame retardant	0.899	0.125	candidate alternative
115-32-2	flame retardant	0.9481	0.5	true positive
2008-39-1	flame retardant	0.8129	0	candidate alternative
2164-09-2	flame retardant	0.8161	0.21875	poor prediction
97-16-5	flame retardant	0.9214	0.125	poor prediction
87674-68-8	flame retardant	0.8434	0.107143	poor prediction
50471-44-8	flame retardant	0.8933	0.21875	functional substitute
72-54-8	flame retardant	0.9452	0.28125	functional substitute
50-29-3	flame retardant	0.9615	0.270833	functional substitute
789-02-6	flame retardant	0.9612	0.3125	functional substitute
16034-77-8	flame retardant	0.8045	0	poor prediction
115-39-9	flame retardant	0.8178	0.1875	functional substitute
26040-51-7	flame retardant	0.9358	0.0625	true positive
99-30-9	flame retardant	0.8888	0.15625	true positive
2683-43-4	flame retardant	0.8792	0	candidate alternative
53-19-0	flame retardant	0.9452	0.375	functional substitute
91-94-1	flame retardant	0.8009	0.375	functional substitute
71526-07-3	flame retardant	0.8213	0	poor prediction
1817-73-8	flame retardant	0.8389	0.0625	candidate alternative
1522-92-5	flame retardant	0.8945	0.0625	true positive
1928-47-8	flame retardant	0.8533	0	candidate alternative
5684-90-2	flame retardant	0.8124	0	poor prediction
1241-94-7	flame retardant	0.8344	0	true positive
15721-02-5	flame retardant	0.8189	0.6875	poor prediction
527-20-8	flame retardant	0.9288	0.0625	candidate alternative
2545-59-7	flame retardant	0.8291	0	poor prediction
141-97-9	flavorant	0.9167	0	candidate alternative
105-45-3	flavorant	0.9235	0	candidate alternative
3848-24-6	flavorant	0.9903	0	candidate alternative
4437-51-8	flavorant	0.9879	0	candidate alternative
78-93-3	flavorant	0.9825	0	candidate alternative
609-14-3	flavorant	0.9324	0	candidate alternative
539-88-8	flavorant	0.9728	0.0625	functional substitute
106-65-0	flavorant	0.9352	0	candidate alternative
623-15-4	flavorant	0.9817	0	true positive
106-31-0	flavorant	0.9232	0	candidate alternative
10420-33-4	flavorant	0.9335	0	candidate alternative
18835-02-4	flavorant	0.9093	0	candidate alternative
13679-70-4	flavorant	0.964	0.0625	functional substitute
623-17-6	flavorant	0.9425	0	candidate alternative
141-79-7	flavorant	0.8652	0	candidate alternative
10599-70-9	flavorant	0.9648	0	candidate alternative
110-13-4	flavorant	0.9825	0	candidate alternative
18640-74-9	flavorant	0.9869	0	candidate alternative
123-62-6	flavorant	0.9015	0	candidate alternative
13706-86-0	flavorant	0.9752	0.0625	true positive
924-16-3	flavorant	0.9144	0	poor prediction
10094-34-5	flavorant	0.825	0	candidate alternative
97-96-1	flavorant	0.8009	0	true positive
15707-23-0	flavorant	0.9956	0.125	functional substitute
96-22-0	flavorant	0.9885	0	candidate alternative
565-61-7	flavorant	0.9888	0.0625	true positive
110-12-3	flavorant	0.9888	0	candidate alternative
110-43-0	flavorant	0.9731	0.03125	functional substitute
106-68-3	flavorant	0.9838	0	candidate alternative
123-18-2	flavorant	0.9566	0	candidate alternative
2050-99-9	flavorant	0.9908	0	candidate alternative
6290-37-5	flavorant	0.898	0	candidate alternative
108-83-8	flavorant	0.9566	0.03125	functional substitute
3777-69-3	flavorant	0.9979	0.125	functional substitute
621-76-1	flavorant	0.9473	0	candidate alternative
24168-70-5	flavorant	0.9268	0	candidate alternative
1629-58-9	flavorant	0.962	0	candidate alternative
4312-99-6	flavorant	0.9689	0	true positive
2497-21-4	flavorant	0.9607	0	true positive
4643-27-0	flavorant	0.9673	0	candidate alternative
103-52-6	flavorant	0.8419	0.0625	functional substitute
103-37-7	flavorant	0.825	0	candidate alternative
646-14-0	flavorant	0.8255	0	candidate alternative
15707-24-1	flavorant	0.9956	0.0625	functional substitute
463-04-7	flavorant	0.9259	0	poor prediction
1124-11-4	flavorant	0.9545	0	candidate alternative
3268-49-3	flavorant	0.9752	0	candidate alternative
109-79-5	flavorant	0.9989	0	true positive
513-53-1	flavorant	0.9961	0	true positive
108-10-1	flavorant	0.9595	0	candidate alternative
111-26-2	flavorant	0.8695	0	true positive
111-68-2	flavorant	0.8695	0	candidate alternative
543-82-8	flavorant	0.9169	0.0625	functional substitute
108-09-8	flavorant	0.9059	0.0625	functional substitute
109-73-9	flavorant	0.9347	0.0625	functional substitute
13952-84-6	flavorant	0.9459	0	candidate alternative
111-36-4	flavorant	0.8118	0	candidate alternative
110-54-3	flavorant	0.8475	0	candidate alternative
142-82-5	flavorant	0.8475	0.0625	functional substitute
109-66-0	flavorant	0.9391	0.0357143	functional substitute
107-83-5	flavorant	0.9161	0	candidate alternative
102-82-9	flavorant	0.8646	0	true positive
5943-30-6	flavorant	0.9958	0	candidate alternative
629-19-6	flavorant	0.9999	0	candidate alternative
589-38-8	flavorant	0.9905	0.0625	functional substitute
931-36-2	flavorant	0.8802	0	candidate alternative
96-29-7	flavorant	0.9455	0.03125	functional substitute
110-69-0	flavorant	0.9391	0	candidate alternative
621-64-7	flavorant	0.9265	0	poor prediction
1883-78-9	flavorant	0.999	0	true positive
65505-17-1	flavorant	0.9991	0	true positive
28588-74-1	flavorant	0.9864	0	candidate alternative
13678-68-7	flavorant	0.9971	0	candidate alternative
1438-94-4	flavorant	0.9648	0	candidate alternative
23747-48-0	flavorant	0.8388	0.0625	functional substitute
4802-20-4	flavorant	0.842	0.125	functional substitute
38462-22-5	flavorant	0.8141	0	candidate alternative
627-05-4	flavorant	0.9104	0	candidate alternative
14667-55-1	flavorant	0.9545	0	candidate alternative
544-16-1	flavorant	0.9259	0	poor prediction
994-05-8	flavorant	0.9473	0.0625	functional substitute
111-43-3	flavorant	0.9473	0	candidate alternative
6863-58-7	flavorant	0.9307	0	candidate alternative
142-96-1	flavorant	0.9527	0	candidate alternative
544-40-1	flavorant	0.9984	0	candidate alternative
872-10-6	flavorant	0.9984	0	true positive
109-46-6	flavorant	0.9244	0.125	functional substitute
998-40-3	flavorant	0.8434	0	poor prediction
110-46-3	flavorant	0.9323	0	poor prediction
108-03-2	flavorant	0.9238	0	candidate alternative
107-87-9	flavorant	0.9864	0	candidate alternative
505-29-3	flavorant	0.9744	0	true positive
65894-82-8	flavorant	0.9917	0	true positive
1679-07-8	flavorant	0.8564	0	true positive
1569-69-3	flavorant	0.8551	0	candidate alternative
35250-53-4	flavorant	0.9953	0.125	true positive
3570-55-6	flavorant	0.994	0	candidate alternative
505-79-3	flavorant	0.9317	0.0625	true positive
298-06-6	flavorant	0.8407	0	poor prediction
67952-65-2	flavorant	0.9882	0.0625	functional substitute
4532-64-3	flavorant	0.9955	0	true positive
2179-57-9	flavorant	0.988	0	candidate alternative
2050-87-5	flavorant	0.9804	0.0833333	true positive
140-90-9	flavorant	0.8675	0.1875	functional substitute
140-89-6	flavorant	0.8675	0.125	functional substitute
140-93-2	flavorant	0.856	0.1875	functional substitute
75-66-1	flavorant	0.9005	0	true positive
100-69-6	flavorant	0.9137	0	candidate alternative
75-33-2	flavorant	0.9924	0	true positive
21948-70-9	flavorant	0.9882	0	true positive
109-06-8	flavorant	0.9681	0	true positive
121-44-8	flavorant	0.802	0	candidate alternative
110-86-1	flavorant	0.9681	0	candidate alternative
10595-95-6	flavorant	0.807	0	poor prediction
55-18-5	flavorant	0.807	0.03125	poor prediction
109-95-5	flavorant	0.8504	0.0833333	true positive
693-95-8	flavorant	0.9738	0	true positive
114-91-0	flavorant	0.912	0	candidate alternative
110-02-1	flavorant	0.979	0	true positive
110-00-9	flavorant	0.9935	0	candidate alternative
534-22-5	flavorant	0.9935	0	true positive
625-86-5	flavorant	0.9935	0	candidate alternative
290-37-9	flavorant	0.9545	0	true positive
108-99-6	flavorant	0.9681	0	true positive
108-89-4	flavorant	0.9681	0	true positive
105-57-7	flavorant	0.8252	0	candidate alternative
105-55-5	flavorant	0.8189	0.03125	poor prediction
420-12-2	flavorant	0.9863	0	true positive
352-93-2	flavorant	0.9995	0.125	true positive
628-13-7	flavorant	0.9681	0	candidate alternative
931-19-1	flavorant	0.9558	0	candidate alternative
1906-79-2	flavorant	0.9695	0.375	functional substitute
51-15-0	flavorant	0.9681	0	candidate alternative
2423-66-7	flavorant	0.9435	0	candidate alternative
13242-44-9	flavorant	0.9022	0	poor prediction
3731-52-0	flavorant	0.9314	0	poor prediction
156-57-0	flavorant	0.912	0	candidate alternative
458-37-7	flavorant	0.8064	0.35	functional substitute
156-06-9	flavorant	0.8785	0	true positive
113-24-6	flavorant	0.8861	0	candidate alternative
127-17-3	flavorant	0.8861	0.03125	functional substitute
328-50-7	flavorant	0.851	0	true positive
123-76-2	flavorant	0.8132	0	candidate alternative
549-68-8	flavorant	0.8082	0.416667	functional substitute
624-92-0	flavorant	0.9898	0	candidate alternative
138-92-1	flavorant	0.8928	0	candidate alternative
22113-87-7	flavorant	0.8352	0	candidate alternative
1646-75-9	flavorant	0.9976	0.0625	functional substitute
930-69-8	flavorant	0.946	0	candidate alternative
108-98-5	flavorant	0.946	0.03125	true positive
1072-71-5	flavorant	0.9954	0.0625	poor prediction
557-30-2	flavorant	0.8291	0	poor prediction
44860-68-6	flavorant	0.838	0	candidate alternative
51-45-6	flavorant	0.8533	0	candidate alternative
111-48-8	flavorant	0.838	0.03125	functional substitute
51481-61-9	flavorant	0.8288	0	poor prediction
76963-41-2	flavorant	0.8555	0	poor prediction
3811-73-2	flavorant	0.9059	0.4375	functional substitute
3696-28-4	flavorant	0.8934	0.5	functional substitute
5332-73-0	flavorant	0.8874	0	candidate alternative
60-23-1	flavorant	0.912	0	candidate alternative
502-55-6	flavorant	0.8911	0	candidate alternative
366-18-7	flavorant	0.9681	0	candidate alternative
553-26-4	flavorant	0.9681	0	candidate alternative
1124-33-0	flavorant	0.8594	0.1875	poor prediction
13194-48-4	flavorant	0.8257	0	candidate alternative
121-75-5	flavorant	0.8328	0	candidate alternative
74051-80-2	flavorant	0.8092	0	poor prediction
109-42-2	flavorant	0.8464	0.0625	functional substitute
41395-83-9	flavorant	0.9208	0	candidate alternative
109-31-9	flavorant	0.988	0	candidate alternative
78-48-8	flavorant	0.8243	0	poor prediction
538-23-8	flavorant	0.9664	0	candidate alternative
2917-73-9	flavorant	0.988	0	candidate alternative
110-33-8	flavorant	0.9859	0	candidate alternative
2432-87-3	flavorant	0.988	0	candidate alternative
82469-79-2	flavorant	0.9859	0	candidate alternative
106-19-4	flavorant	0.9723	0	candidate alternative
6938-94-9	flavorant	0.9452	0	candidate alternative
109-43-3	flavorant	0.988	0	candidate alternative
141-04-8	flavorant	0.9452	0	candidate alternative
15520-10-2	flavorant	0.9169	0	candidate alternative
94317-64-3	flavorant	0.883	0.0625	poor prediction
2179-59-1	flavorant	0.981	0	true positive
111-88-6	flavorant	0.9556	0	candidate alternative
3698-94-0	flavorant	0.9044	0	candidate alternative
1191-62-4	flavorant	0.9556	0.0625	true positive
623-51-8	flavorant	0.872	0	candidate alternative
2935-90-2	flavorant	0.9032	0	candidate alternative
124-09-4	flavorant	0.8695	0	candidate alternative
2365-48-2	flavorant	0.8472	0	candidate alternative
4131-74-2	flavorant	0.981	0.0625	functional substitute
13010-08-7	flavorant	0.9144	0	poor prediction
26576-84-1	flavorant	0.9863	0	candidate alternative
874-80-6	flavorant	0.9863	0	candidate alternative
74440-81-6	flavorant	0.9291	0.25	functional substitute
692-13-7	flavorant	0.8673	0	candidate alternative
16215-21-7	flavorant	0.9201	0.0625	functional substitute
105-99-7	flavorant	0.9723	0	candidate alternative
141-03-7	flavorant	0.9723	0.0625	true positive
110-40-7	flavorant	0.988	0.0625	functional substitute
2550-40-5	flavorant	0.8615	0	true positive
6911-51-9	flavorant	0.9988	0.125	true positive
28588-75-2	flavorant	0.9991	0	true positive
262-20-4	flavorant	0.8563	0.03125	poor prediction
55-38-9	flavorant	0.8754	0.104167	functional substitute
622-20-8	flavorant	0.9232	0.0625	functional substitute
828-26-2	flavorant	0.8562	0	poor prediction
944-22-9	flavorant	0.825	0	poor prediction
14222-60-7	flavorant	0.974	0	candidate alternative
17252-51-6	flavorant	0.9876	0	candidate alternative
13593-03-8	flavorant	0.9263	0.0625	functional substitute
35400-43-2	flavorant	0.8319	0	candidate alternative
3383-96-8	flavorant	0.8947	0.25	poor prediction
555-90-8	flavorant	0.9153	0	poor prediction
536-33-4	flavorant	0.966	0.0416667	functional substitute
298-02-2	flavorant	0.92	0.0625	functional substitute
[truncated: 2,413 more rows]
